# Supplementary material for: Protein composition analysis of human plasma-derived and recombinant human serum albumin preparations based on 4D label-free proteomics
Source: PeerJ. 2025 Jun 30;13:e19624. doi: 10.7717/peerj.19624 (PMC12225626; doi:10.7717/peerj.19624)
Supplement: Supplemental Information 1 [file peerj-13-19624-s001.xlsx]

## Sheet: data
Count	Species	Frequency	MW
1	Yeast	1.92308	0-10
6	Yeast	11.5385	10-20
7	Yeast	13.4615	100-200
10	Yeast	19.2308	20-30
4	Yeast	7.69231	30-40
5	Yeast	9.61538	40-50
8	Yeast	15.3846	50-70
9	Yeast	17.3077	70-100
2	Yeast	3.84615	>200
6	Oryza sativa	3.94737	0-10
34	Oryza sativa	22.3684	10-20
8	Oryza sativa	5.26316	100-200
24	Oryza sativa	15.7895	20-30
21	Oryza sativa	13.8158	30-40
28	Oryza sativa	18.4211	40-50
6	Oryza sativa	3.94737	50-70
23	Oryza sativa	15.1316	70-100
2	Oryza sativa	1.31579	>200
1	Human	0.219298	0-10
54	Human	11.8421	10-20
55	Human	12.0614	100-200
48	Human	10.5263	20-30
48	Human	10.5263	30-40
70	Human	15.3509	40-50
82	Human	17.9825	50-70
67	Human	14.693	70-100
31	Human	6.79825	>200
