# Supplementary material for: Protein composition analysis of human plasma-derived and recombinant human serum albumin preparations based on 4D label-free proteomics
Source: PeerJ. 2025 Jun 30;13:e19624. doi: 10.7717/peerj.19624 (PMC12225626; doi:10.7717/peerj.19624)
Supplement: Supplemental Information 3 [file peerj-13-19624-s003.xlsx]

## Sheet: HP
HP(ug/mL)
	A	B	C	D	E	F	G	H
1	Range?	Range?	240.284	253.072	226.212	291.802	210.01	245.096
2	Range?	Range?	248.674	245.302	248.962	268.786	204.798	270.544
3	Range?	Range?	238.692	228.324	238.544	290.624	198.78	224.832
4	Range?	Range?	256.372	264.546	262.392	312.82	232.366	270.19
5	Range?	Range?	246.006	247.811	244.028	291.008	211.488	252.666

## Sheet: HPX
HPX(ug/mL)
	A	B	C	D	E	F	G	H
1	Range?	Range?	31.4	119.86	171.48	24.78	31.84	113.82
2	Range?	Range?	30.44	111.78	172.4	25.4	30.52	110.3
3	Range?	Range?	29.58	116.46	159.06	24.94	27.66	108.26
4	Range?	Range?	29.9	115.48	188.52	23.66	32.66	106.86
5	Range?	Range?	30.33	115.895	172.865	24.695	30.67	109.81

## Sheet: TTR
TTR(ug/mL)
	A	B	C	D	E	F	G	H
1	Range?	Range?	15.58	15.54	18.7	17.66	11.48	15.94
2	Range?	Range?	15.54	15.56	17.84	14.88	9.86	17.2
3	Range?	Range?	14.5	18.1	17.72	17.14	11.9	14.9
4	Range?	Range?	13.52	16.98	14.44	14.5	14.92	18.82
5	Range?	Range?	14.785	16.545	17.175	16.045	12.04	16.715

## Sheet: TF
TF(ug/mL)
	A	B	C	D	E	F	G	H
1	Range?	Range?	15.51	77.714	65.054	70.596	Range?	87.496
2	Range?	Range?	24.17	83.75	23.538	116.188	Range?	52.56
3	Range?	Range?	66.504	35.324	40.978	110.846	Range?	67.804
4	Range?	Range?	25.08	41.064	40.69	61.682	Range?	80.634
5	Range?	Range?	32.816	59.463	42.565	89.828	Range?	72.1235
