# Supplementary material for: Protein composition analysis of human plasma-derived and recombinant human serum albumin preparations based on 4D label-free proteomics
Source: PeerJ journal article supplement (doi:10.7717/peerj.19624), 2025-06-30
Supplement: Supplementary.zip [file Supplementary.zip]

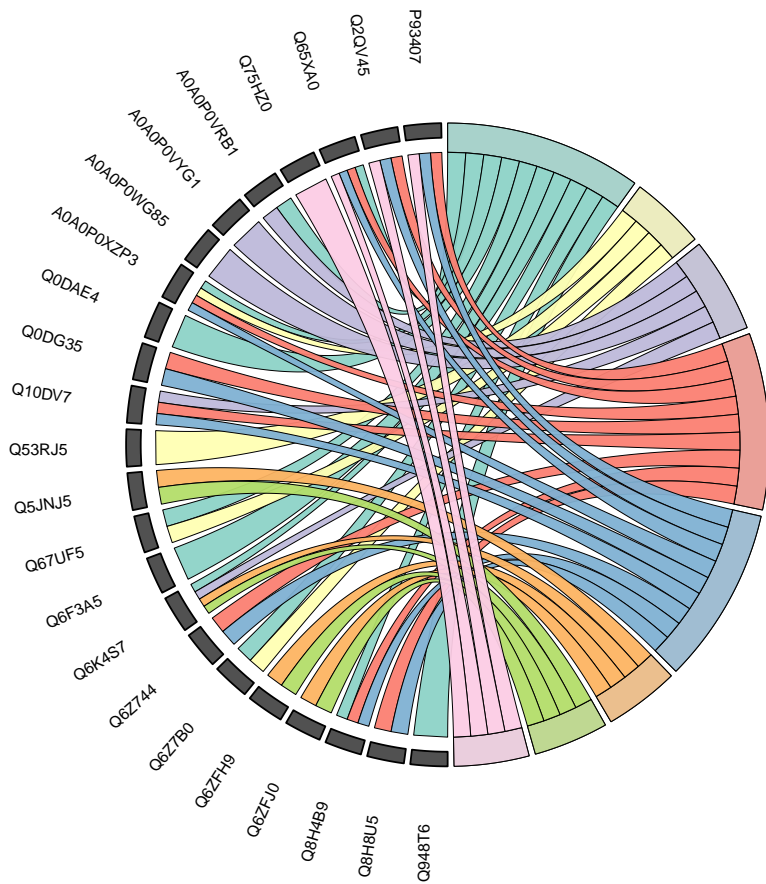

**CC Terms**

- |                                                                                                                            |                                                                                                                                      |
|----------------------------------------------------------------------------------------------------------------------------|--------------------------------------------------------------------------------------------------------------------------------------|
|  GO:0005773 vacuole                     |  GO:0009570 chloroplast stroma                    |
|  GO:0005788 endoplasmic reticulum lumen |  GO:0031225 anchored component of membrane        |
|  GO:0005856 cytoskeleton                |  GO:0046658 anchored component of plasma membrane |
|  GO:0009532 plastid stroma              |  GO:0048046 apoplast                              |
