# Supplementary material for: Protein composition analysis of human plasma-derived and recombinant human serum albumin preparations based on 4D label-free proteomics
Source: PeerJ journal article supplement (doi:10.7717/peerj.19624), 2025-06-30
Supplement: Supplementary.zip [file Supplementary.zip]

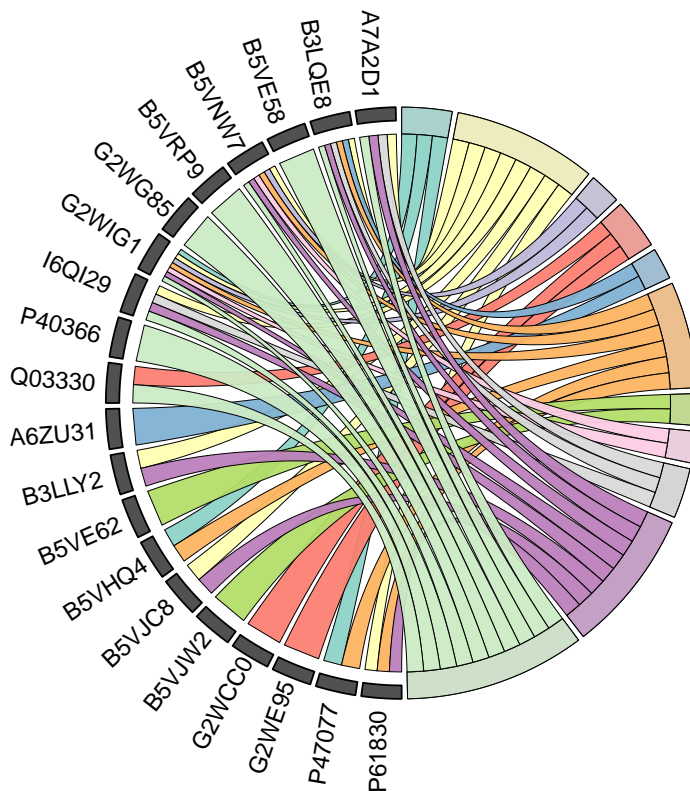

## BP Terms

- |                                                                                                                                                                                                            |                                                                                                                                                                                                         |
|------------------------------------------------------------------------------------------------------------------------------------------------------------------------------------------------------------|---------------------------------------------------------------------------------------------------------------------------------------------------------------------------------------------------------|
| <span style="display: inline-block; width: 15px; height: 15px; background-color: #4682B4; border: 1px solid black; margin-right: 5px;"></span> GO:0000469 cleavage involved in rRNA processing             | <span style="display: inline-block; width: 15px; height: 15px; background-color: #9ACD32; border: 1px solid black; margin-right: 5px;"></span> GO:0031297 replication fork processing                   |
| <span style="display: inline-block; width: 15px; height: 15px; background-color: #FFFF00; border: 1px solid black; margin-right: 5px;"></span> GO:0006351 transcription, DNA-templated                     | <span style="display: inline-block; width: 15px; height: 15px; background-color: #FFB6C1; border: 1px solid black; margin-right: 5px;"></span> GO:0043631 RNA polyadenylation                           |
| <span style="display: inline-block; width: 15px; height: 15px; background-color: #9370DB; border: 1px solid black; margin-right: 5px;"></span> GO:0006378 mRNA polyadenylation                             | <span style="display: inline-block; width: 15px; height: 15px; background-color: #D3D3D3; border: 1px solid black; margin-right: 5px;"></span> GO:0045991 carbon catabolite activation of transcription |
| <span style="display: inline-block; width: 15px; height: 15px; background-color: #FF4500; border: 1px solid black; margin-right: 5px;"></span> GO:0006473 protein acetylation                              | <span style="display: inline-block; width: 15px; height: 15px; background-color: #800080; border: 1px solid black; margin-right: 5px;"></span> GO:0097659 nucleic acid-templated transcription          |
| <span style="display: inline-block; width: 15px; height: 15px; background-color: #4682B4; border: 1px solid black; margin-right: 5px;"></span> GO:0009067 aspartate family amino acid biosynthetic process | <span style="display: inline-block; width: 15px; height: 15px; background-color: #90EE90; border: 1px solid black; margin-right: 5px;"></span> GO:2001141 regulation of RNA biosynthetic process        |
| <span style="display: inline-block; width: 15px; height: 15px; background-color: #FF8C00; border: 1px solid black; margin-right: 5px;"></span> GO:0016072 rRNA metabolic process                           |                                                                                                                                                                                                         |
