# Supplementary material for: Protein composition analysis of human plasma-derived and recombinant human serum albumin preparations based on 4D label-free proteomics
Source: PeerJ journal article supplement (doi:10.7717/peerj.19624), 2025-06-30
Supplement: Supplementary.zip [file Supplementary.zip]

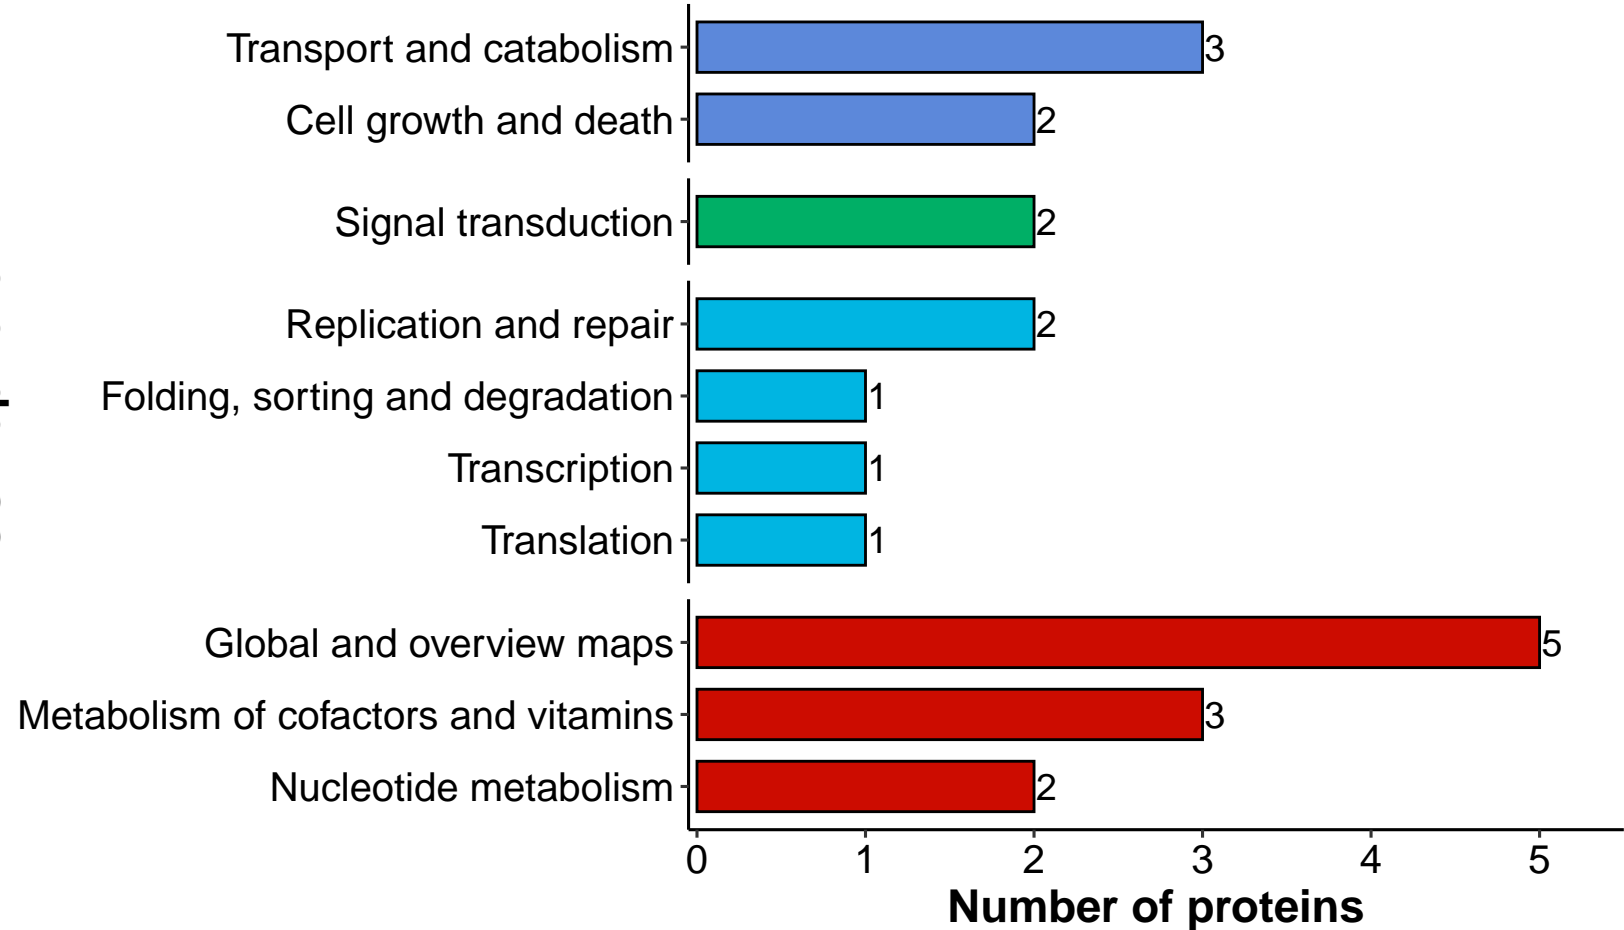

## KEGG Map Level 1

- Cellular Processes
- Environmental Information Processing
- Genetic Information Processing
- Metabolism
