# Supplementary material for: Protein composition analysis of human plasma-derived and recombinant human serum albumin preparations based on 4D label-free proteomics
Source: PeerJ journal article supplement (doi:10.7717/peerj.19624), 2025-06-30
Supplement: Supplementary.zip [file Supplementary.zip]

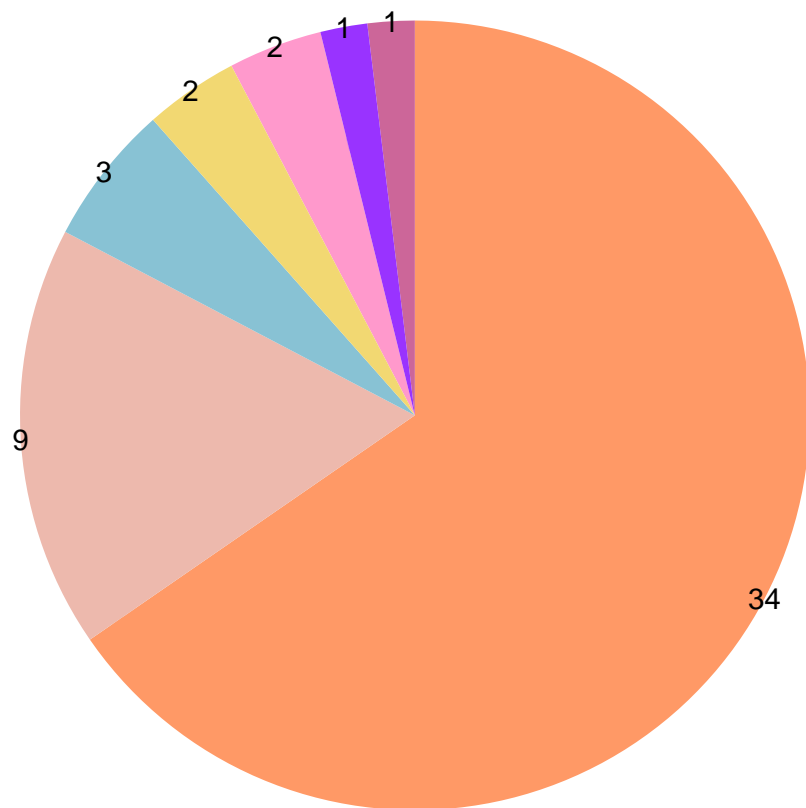

### Subcellular localization

- nucleus 34(65.38%)
- plasma membrane 9(17.31%)
- cytoplasm 3(5.77%)
- cytoplasm,nucleus 2(3.85%)
- mitochondria 2(3.85%)
- cytoskeleton 1(1.92%)
- extracellular 1(1.92%)
