# Supplementary material for: Protein composition analysis of human plasma-derived and recombinant human serum albumin preparations based on 4D label-free proteomics
Source: PeerJ journal article supplement (doi:10.7717/peerj.19624), 2025-06-30
Supplement: Supplementary.zip [file Supplementary.zip]

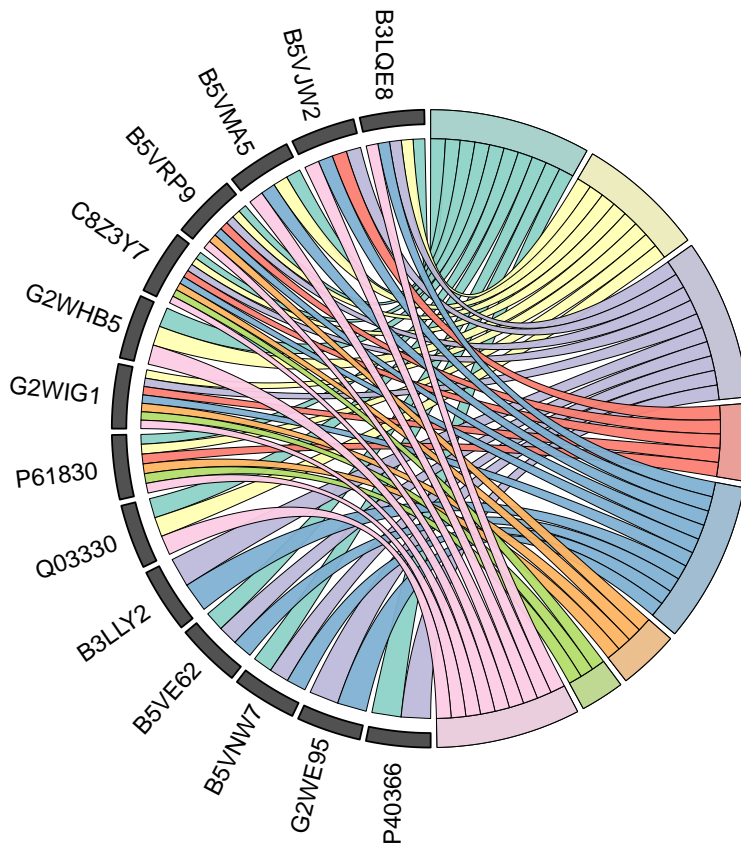

## CC Terms

- |                                                                                                                               |                                                                                                                                   |
|-------------------------------------------------------------------------------------------------------------------------------|-----------------------------------------------------------------------------------------------------------------------------------|
|  GO:0000228 nuclear chromosome             |  GO:0005694 chromosome                         |
|  GO:0000775 chromosome, centromeric region |  GO:0005721 pericentric heterochromatin        |
|  GO:0000785 chromatin                      |  GO:0031934 mating-type region heterochromatin |
|  GO:0000792 heterochromatin                |  GO:0098687 chromosomal region                 |
