# Supplementary material for: Protein composition analysis of human plasma-derived and recombinant human serum albumin preparations based on 4D label-free proteomics
Source: PeerJ journal article supplement (doi:10.7717/peerj.19624), 2025-06-30
Supplement: Supplementary.zip [file Supplementary.zip]

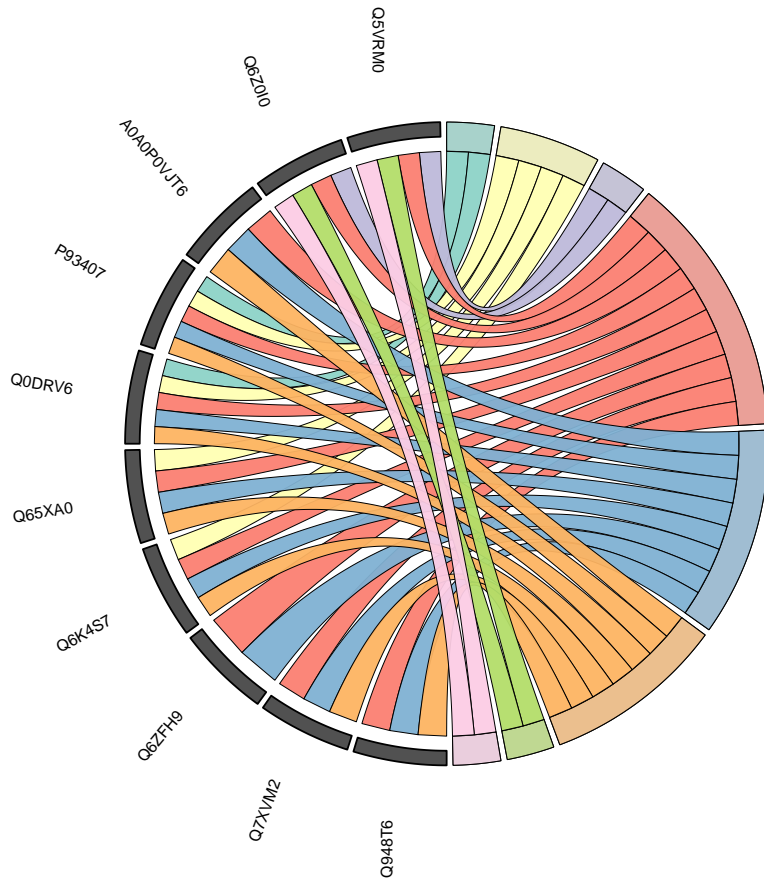

### MF Terms

|                                                                                                                              |                                                                                                                                  |
|------------------------------------------------------------------------------------------------------------------------------|----------------------------------------------------------------------------------------------------------------------------------|
|  GO:0004784 superoxide dismutase activity |  GO:0046872 metal ion binding                 |
|  GO:0005507 copper ion binding            |  GO:0046914 transition metal ion binding      |
|  GO:0031210 phosphatidylcholine binding   |  GO:0050997 quaternary ammonium group binding |
|  GO:0043169 cation binding                |  GO:0070405 ammonium ion binding              |
