# Supplementary material for: Protein composition analysis of human plasma-derived and recombinant human serum albumin preparations based on 4D label-free proteomics
Source: PeerJ journal article supplement (doi:10.7717/peerj.19624), 2025-06-30
Supplement: Supplementary.zip [file Supplementary.zip]

## Sheet: ident
GO Terms Level 1	GO Terms Description	GO Terms Level	GO Terms ID	Mapping	Background	All Mapping	All Background	Fold Enrichment	Fisher's exact test p value	-log10(p value)	Related proteins
Cellular Component	extracellular region	2	GO:0005576	218	2534	418	16541	3.4	6.00523e-71	70.22	A8K2U0 O00391 O15195 O43240 O43707 O75882 O94919 P00441 P00450 P00533 P00558 P00738 P00739 P00742 P00748 P00918 P01008 P01009 P01011 P01019 P01024 P01040 P01042 P01857 P01861 P01871 P02042 P02647 P02652 P02654 P02655 P02656 P02749 P02750 P02753 P02760 P02763 P02765 P02766 P02774 P02787 P02788 P02790 P03952 P04040 P04075 P04080 P04083 P04180 P04217 P04264 P04278 P05089 P05090 P05109 P05120 P05154 …
	extracellular space	2	GO:0005615	161	1490	418	16541	4.28	1.92411e-62	61.72	A8K2U0 O00391 O15195 O75882 P00441 P00450 P00533 P00558 P00738 P00739 P00748 P00918 P01008 P01009 P01011 P01019 P01024 P01040 P01042 P01857 P01861 P01871 P02042 P02647 P02652 P02654 P02655 P02656 P02749 P02750 P02753 P02760 P02763 P02765 P02766 P02774 P02787 P02788 P02790 P03952 P04040 P04075 P04080 P04083 P04180 P04278 P05089 P05090 P05109 P05120 P05154 P05155 P05164 P05362 P05543 P06276 P06396 …
	vesicle lumen	4	GO:0031983	84	448	418	16541	7.42	2.28897e-49	48.64	A8K2U0 O00391 O15195 O43707 P00533 P00738 P00739 P01009 P01011 P01024 P01042 P02042 P02647 P02749 P02750 P02763 P02765 P02766 P02787 P02788 P02790 P04040 P04075 P04080 P04217 P05089 P05109 P05155 P05164 P06396 P06702 P07339 P07355 P08238 P08697 P09211 P0C0L5 P11142 P13639 P14174 P14923 P15144 P18206 P19652 P22735 P28676 P29508 P30740 P31151 P31949 P50395 P53634 P54108 P55072 P59666 P61626 P62937 …
	cytoplasmic vesicle lumen	5	GO:0060205	81	442	418	16541	7.25	9.4121e-47	46.03	A8K2U0 O00391 O15195 O43707 P00738 P00739 P01009 P01011 P01024 P01042 P02042 P02647 P02749 P02750 P02763 P02765 P02766 P02787 P02788 P02790 P04040 P04075 P04080 P04217 P05089 P05109 P05155 P05164 P06396 P06702 P07339 P07355 P08238 P08697 P09211 P0C0L5 P11142 P13639 P14174 P14923 P18206 P19652 P22735 P28676 P29508 P30740 P31151 P31949 P50395 P53634 P54108 P55072 P59666 P61626 P62937 P68104 P68371 …
	secretory granule	8	GO:0030141	123	1133	418	16541	4.3	3.09547e-46	45.51	A8K2U0 O00391 O15144 O15195 O43707 P00441 P00738 P00739 P01009 P01011 P01024 P01042 P02042 P02647 P02749 P02750 P02763 P02765 P02766 P02787 P02788 P04040 P04075 P04080 P04217 P04264 P05089 P05109 P05154 P05155 P05164 P05556 P06396 P06702 P07339 P07355 P07384 P08238 P08571 P08697 P09211 P09525 P0C0L5 P0DMV9 P10809 P11142 P13639 P14151 P14174 P14923 P15144 P15169 P15291 P15309 P15924 P16070 P17931 …
	secretory granule lumen	6	GO:0034774	77	422	418	16541	7.22	3.04183e-44	43.52	A8K2U0 O00391 O15195 O43707 P00738 P00739 P01009 P01011 P01024 P01042 P02647 P02749 P02750 P02763 P02765 P02766 P02787 P02788 P04040 P04075 P04080 P04217 P05089 P05109 P05155 P05164 P06396 P06702 P07339 P07355 P08238 P08697 P09211 P0C0L5 P11142 P13639 P14174 P14923 P18206 P19652 P22735 P28676 P29508 P30740 P31151 P31949 P50395 P53634 P54108 P55072 P59666 P61626 P62937 P68104 P68371 P80188 P80511 …
	secretory vesicle	7	GO:0099503	128	1315	418	16541	3.85	4.87312e-43	42.31	A8K2U0 O00391 O15144 O15195 O43707 P00441 P00738 P00739 P01009 P01011 P01024 P01042 P02042 P02647 P02749 P02750 P02763 P02765 P02766 P02787 P02788 P04040 P04075 P04080 P04217 P04264 P05089 P05109 P05154 P05155 P05164 P05556 P06396 P06702 P07108 P07339 P07355 P07384 P08238 P08571 P08697 P09211 P09525 P0C0L5 P0DMV9 P10809 P11142 P13639 P14151 P14174 P14923 P15144 P15169 P15291 P15309 P15924 P16070 …
	vesicle	4	GO:0031982	173	2822	418	16541	2.43	1.61968e-32	31.79	A8K2U0 O00391 O15144 O15195 O43707 O75369 P00441 P00533 P00738 P00739 P01009 P01011 P01024 P01042 P02042 P02647 P02652 P02655 P02656 P02749 P02750 P02753 P02763 P02765 P02766 P02787 P02788 P02790 P04040 P04075 P04080 P04083 P04217 P04264 P04843 P05089 P05109 P05154 P05155 P05164 P05362 P05556 P06396 P06702 P07108 P07339 P07355 P07384 P07911 P08238 P08571 P08670 P08697 P09211 P09525 P0C0L5 P0C869 …
Molecular Function	endopeptidase inhibitor activity	5	GO:0004866	37	170	391	14642	8.15	1.60249e-23	22.8	A8K2U0 O15195 P01008 P01009 P01011 P01019 P01040 P01042 P02760 P02765 P02787 P02788 P04080 P04406 P05120 P05154 P05155 P05543 P06396 P08185 P08697 P29508 P30740 P31025 P48594 P49662 P51812 Q14624 Q15149 Q96P63 Q9H4A9 Q9UGM5 Q9UIV8 P01033 P01034 P05546 Q13103
	peptidase inhibitor activity	4	GO:0030414	37	174	391	14642	7.96	3.82342e-23	22.42	A8K2U0 O15195 P01008 P01009 P01011 P01019 P01040 P01042 P02760 P02765 P02787 P02788 P04080 P04406 P05120 P05154 P05155 P05543 P06396 P08185 P08697 P29508 P30740 P31025 P48594 P49662 P51812 Q14624 Q15149 Q96P63 Q9H4A9 Q9UGM5 Q9UIV8 P01033 P01034 P05546 Q13103
	endopeptidase regulator activity	4	GO:0061135	37	176	391	14642	7.87	5.85091e-23	22.23	A8K2U0 O15195 P01008 P01009 P01011 P01019 P01040 P01042 P02760 P02765 P02787 P02788 P04080 P04406 P05120 P05154 P05155 P05543 P06396 P08185 P08697 P29508 P30740 P31025 P48594 P49662 P51812 Q14624 Q15149 Q96P63 Q9H4A9 Q9UGM5 Q9UIV8 P01033 P01034 P05546 Q13103
	peptidase regulator activity	3	GO:0061134	40	216	391	14642	6.93	1.44442e-22	21.84	A8K2U0 O15195 P01008 P01009 P01011 P01019 P01040 P01042 P02760 P02765 P02787 P02788 P04080 P04406 P05120 P05154 P05155 P05543 P06396 P08185 P08697 P29508 P30740 P31025 P48594 P49662 P51812 P53634 P55072 P63244 Q14624 Q15149 Q96P63 Q9H4A9 Q9UGM5 Q9UIV8 P01033 P01034 P05546 Q13103
	enzyme inhibitor activity	3	GO:0004857	52	431	391	14642	4.52	3.42273e-20	19.47	A8K2U0 O15195 P01008 P01009 P01011 P01019 P01040 P01042 P02647 P02652 P02654 P02655 P02656 P02760 P02765 P02787 P02788 P04080 P04083 P04406 P04792 P05120 P05154 P05155 P05543 P06396 P07355 P07359 P08185 P08697 P09525 P29508 P30740 P31025 P31947 P48594 P49662 P51812 P61981 P62081 P62258 P63244 Q14624 Q15149 Q96P63 Q9H4A9 Q9UGM5 Q9UIV8 P01033 P01034 P05546 Q13103
	protease binding	4	GO:0002020	31	216	391	14642	5.37	1.69692e-14	13.77	A8K2U0 P01008 P01009 P01040 P01042 P04075 P04080 P05154 P05556 P07355 P08697 P0DMV9 P10809 P14151 P14174 P27487 P28676 P29508 P30740 P48594 P49662 P55072 P80188 Q15149 Q96P63 Q9UIV8 P01033 P01034 Q07954 Q9HC84 P00746
	serine-type endopeptidase inhibitor activity	6	GO:0004867	18	65	391	14642	10.37	5.1109e-14	13.29	A8K2U0 P01008 P01009 P01011 P01019 P02760 P05120 P05154 P05155 P05543 P08185 P08697 P29508 P30740 P48594 Q96P63 Q9UIV8 P05546
	structural constituent of cytoskeleton	2	GO:0005200	23	133	391	14642	6.48	8.38215e-13	12.08	O15144 O15195 O60437 P02533 P02538 P04259 P06396 P08670 P08727 P08779 P13647 P15924 P18206 P19012 P35527 P35908 P46939 P48668 P63261 P68133 Q04695 Q15149 P13646
Biological Process	regulation of proteolysis	6	GO:0030162	83	1010	417	16644	3.28	2.11487e-22	21.67	A8K2U0 O15195 P00748 P01008 P01009 P01011 P01019 P01024 P01040 P01042 P02760 P02765 P02787 P02788 P03952 P04080 P04406 P05109 P05120 P05154 P05155 P05543 P06396 P06702 P06733 P07355 P07384 P08185 P08238 P08697 P0C0L5 P0DMV9 P0DOY3 P10809 P11021 P11142 P12830 Q5VT79 P14735 P15169 P15309 P16070 P19784 P22792 P29508 P30740 P31025 P31947 P35232 P35579 P42224 P48594 P49662 P51812 P53634 P55072 P62081 …
	negative regulation of endopeptidase activity	7	GO:0010951	43	277	417	16644	6.2	4.7595e-22	21.32	A8K2U0 O15195 P01008 P01009 P01011 P01019 P01040 P01042 P02760 P02765 P02787 P02788 P04080 P04406 P05120 P05154 P05155 P05543 P06396 P08185 P08697 P0DMV9 P11021 Q5VT79 P16070 P29508 P30740 P31025 P31947 P48594 P49662 P51812 P62258 Q14624 Q15149 Q96P63 Q9H4A9 Q9UGM5 Q9UIV8 P01033 P01034 P05546 Q13103
	negative regulation of peptidase activity	6	GO:0010466	43	284	417	16644	6.04	1.30038e-21	20.89	A8K2U0 O15195 P01008 P01009 P01011 P01019 P01040 P01042 P02760 P02765 P02787 P02788 P04080 P04406 P05120 P05154 P05155 P05543 P06396 P08185 P08697 P0DMV9 P11021 Q5VT79 P16070 P29508 P30740 P31025 P31947 P48594 P49662 P51812 P62258 Q14624 Q15149 Q96P63 Q9H4A9 Q9UGM5 Q9UIV8 P01033 P01034 P05546 Q13103
	negative regulation of proteolysis	7	GO:0045861	52	454	417	16644	4.57	2.67232e-20	19.57	A8K2U0 O15195 P01008 P01009 P01011 P01019 P01040 P01042 P02760 P02765 P02787 P02788 P04080 P04406 P05120 P05154 P05155 P05543 P06396 P08185 P08238 P08697 P0DMV9 P11021 P12830 Q5VT79 P14735 P15309 P16070 P19784 P29508 P30740 P31025 P31947 P48594 P49662 P51812 P62081 P62258 Q14624 Q15149 Q96IY4 Q96P63 Q9H4A9 Q9UGM5 Q9UIV8 P01033 P01034 P05546 Q13103 Q8TEC5 Q96KB5
	regulation of endopeptidase activity	6	GO:0052548	54	493	417	16644	4.37	3.7335e-20	19.43	A8K2U0 O15195 P01008 P01009 P01011 P01019 P01040 P01042 P02760 P02765 P02787 P02788 P04080 P04406 P05109 P05120 P05154 P05155 P05543 P06396 P06702 P08185 P08697 P0DMV9 P10809 P11021 P12830 Q5VT79 P16070 P29508 P30740 P31025 P31947 P42224 P48594 P49662 P51812 P55072 P62258 P63244 Q14624 Q15149 Q96P63 Q9H4A9 Q9UGM5 Q9UIV8 Q9Y3M8 O75340 P01033 P01034 P05546 Q9BZF9 Q6IQ55 Q13103
	keratinocyte differentiation	6	GO:0030216	39	285	417	16644	5.46	4.10919e-18	17.39	O60437 O75369 P01040 P02533 P02538 P04083 P04259 P04264 P07384 P08727 P08779 P12830 P13645 P13647 P14923 P15924 P19012 P20930 P22735 P31151 P31944 P31947 P35527 P35908 P48668 Q02413 Q04695 Q08188 Q08554 Q13835 Q15517 Q15648 Q7Z794 Q86SG5 Q92817 Q9C075 Q8N1N4 Q14CN4 P13646
	regulation of protein processing	7	GO:0070613	28	215	417	16644	5.2	8.70928e-13	12.06	A8K2U0 O15195 P00748 P01024 P01042 P03952 P05155 P06396 P06733 P07355 P08697 P0C0L5 P0DOY3 P12830 P15169 P15309 P22792 P35232 P35579 P49662 Q04756 Q15149 Q96IY4 Q9UI42 P0CG04 P06681 P0C0L4 P00751
	regulation of protein maturation	6	GO:1903317	28	217	417	16644	5.15	1.09729e-12	11.96	A8K2U0 O15195 P00748 P01024 P01042 P03952 P05155 P06396 P06733 P07355 P08697 P0C0L5 P0DOY3 P12830 P15169 P15309 P22792 P35232 P35579 P49662 Q04756 Q15149 Q96IY4 Q9UI42 P0CG04 P06681 P0C0L4 P00751
	regulation of acute inflammatory response	6	GO:0002673	22	136	417	16644	6.46	3.19647e-12	11.5	A8K2U0 P00748 P01024 P01042 P03952 P05155 P09211 P0C0L5 P0DOY3 P14174 P15169 P22792 P35232 Q04756 Q16853 Q96IY4 Q9UI42 P0CG04 P06681 P0C0L4 P00751 Q99650
	negative regulation of protein metabolic process	6	GO:0051248	81	1532	417	16644	2.11	8.0606e-11	10.09	A8K2U0 O15195 P00533 P01008 P01009 P01011 P01019 P01040 P01042 P02760 P02765 P02787 P02788 P04080 P04406 P04792 P05090 P05120 P05154 P05155 P05543 P06396 P07355 P07359 P07384 P08185 P08238 P08697 P09211 P0DMV9 P11021 P12830 Q5VT79 P14174 P14635 P14735 P15309 P16070 P17813 P19784 P21333 P29508 P30086 P30740 P31025 P31947 P35232 P46939 P47756 P48594 P49662 Q05193 P51812 P52907 P63261 P61981 P62081 …
	blood coagulation, fibrin clot formation	6	GO:0072378	11	34	417	16644	12.91	3.64819e-10	9.44	A8K2U0 P00742 P00748 P01042 P02749 P03952 P05155 P07359 P22735 Q04756 Q9HC84
	protein-lipid complex remodeling	6	GO:0034368	11	34	417	16644	12.91	3.64819e-10	9.44	P01019 P02647 P02652 P02654 P02655 P02656 P04180 P05164 P55058 O95445 P11597
	blood coagulation, intrinsic pathway	6	GO:0007597	9	22	417	16644	16.33	1.33024e-09	8.88	A8K2U0 P00748 P01042 P02749 P03952 P05155 P07359 Q04756 Q9HC84
	negative regulation of programmed cell death	6	GO:0043069	67	1265	417	16644	2.11	5.13608e-09	8.29	O15195 P00441 P00533 P01019 P02545 P02749 P02787 P02788 P04040 P04083 P04406 P04792 P05120 P05164 P05362 P05556 P06396 P06733 P07333 P07384 P08238 P09211 P09525 P09601 P09619 P62987 P0DMV9 P10809 P11021 P11142 P12532 P14174 P16070 P16885 P17931 P18510 P19784 P21333 P26992 P29508 P30530 P30740 P31947 P32119 P35232 P38646 P49662 P51812 P62258 P63104 Q15149 Q15517 Q15648 Q8IUG5 Q8TDY2 Q969H8 Q96EP0 …

## Sheet: ident GO2Protein
GO Terms Level 1	GO Terms ID	GO Terms Level	GO Terms Description	Fold Enrichment	Fisher's exact test p value	Protein accession	Protein description	Gene name	MW [kDa]	Coverage [%]	MS/MS Counts	Peptides	Unique peptides	Razor + unique peptides	Intensity
Biological Process	GO:0071704	2	organic substance metabolic process	1.23	1.07378e-06	P07339	Cathepsin D OS=Homo sapiens OX=9606 GN=CTSD PE=1 SV=1	CTSD	44.552	9.7	4	3	3	3	29548000
Biological Process	GO:1901652	4	response to peptide	1.89	0.000349774	P02753	Retinol-binding protein 4 OS=Homo sapiens OX=9606 GN=RBP4 PE=1 SV=3	RBP4	23.01	47.3	7	7	7	7	728740000
Biological Process	GO:1901652	4	response to peptide	1.89	0.000349774	P02763	Alpha-1-acid glycoprotein 1 OS=Homo sapiens OX=9606 GN=ORM1 PE=1 SV=2	ORM1	23.539	41.8	11	8	6	6	3742300000
Biological Process	GO:1901652	4	response to peptide	1.89	0.000349774	P02765	Alpha-2-HS-glycoprotein OS=Homo sapiens OX=9606 GN=AHSG PE=1 SV=2	AHSG	39.34	23.2	41	7	7	7	4512000000
Biological Process	GO:1901652	4	response to peptide	1.89	0.000349774	P04040	Catalase OS=Homo sapiens OX=9606 GN=CAT PE=1 SV=3	CAT	59.755	8.7	2	2	2	2	7648000
Biological Process	GO:1901652	4	response to peptide	1.89	0.000349774	P04083	Annexin A1 OS=Homo sapiens OX=9606 GN=ANXA1 PE=1 SV=2	ANXA1	38.714	0	0	0	0	0	0
Biological Process	GO:1901652	4	response to peptide	1.89	0.000349774	P04792	Heat shock protein beta-1 OS=Homo sapiens OX=9606 GN=HSPB1 PE=1 SV=2	HSPB1	22.782	7.8	1	1	1	1	1730200
Biological Process	GO:1901652	4	response to peptide	1.89	0.000349774	P05089	Arginase-1 OS=Homo sapiens OX=9606 GN=ARG1 PE=1 SV=2	ARG1	34.735	8.4	5	3	3	3	32997000
Biological Process	GO:1901652	4	response to peptide	1.89	0.000349774	P05362	Intercellular adhesion molecule 1 OS=Homo sapiens OX=9606 GN=ICAM1 PE=1 SV=2	ICAM1	57.825	0	0	0	0	0	0
Biological Process	GO:1901652	4	response to peptide	1.89	0.000349774	P05543	Thyroxine-binding globulin OS=Homo sapiens OX=9606 GN=SERPINA7 PE=1 SV=2	SERPINA7	46.324	13.7	13	6	6	6	768030000
Biological Process	GO:1901652	4	response to peptide	1.89	0.000349774	P09211	Glutathione S-transferase P OS=Homo sapiens OX=9606 GN=GSTP1 PE=1 SV=2	GSTP1	23.356	0	0	0	0	0	0
Biological Process	GO:1901652	4	response to peptide	1.89	0.000349774	P14174	Macrophage migration inhibitory factor OS=Homo sapiens OX=9606 GN=MIF PE=1 SV=4	MIF	12.476	0	0	0	0	0	0
Biological Process	GO:1901652	4	response to peptide	1.89	0.000349774	P14618	Pyruvate kinase PKM OS=Homo sapiens OX=9606 GN=PKM PE=1 SV=4	PKM	57.936	0	0	0	0	0	0
Biological Process	GO:1901652	4	response to peptide	1.89	0.000349774	P14735	Insulin-degrading enzyme OS=Homo sapiens OX=9606 GN=IDE PE=1 SV=4	IDE	117.97	0	0	0	0	0	0
Biological Process	GO:1901652	4	response to peptide	1.89	0.000349774	P16885	1-phosphatidylinositol 4,5-bisphosphate phosphodiesterase gamma-2 OS=Homo sapiens OX=9606 GN=PLCG2 PE=1 SV=4	PLCG2	147.87	0	0	0	0	0	0
Biological Process	GO:1901652	4	response to peptide	1.89	0.000349774	P17174	Aspartate aminotransferase, cytoplasmic OS=Homo sapiens OX=9606 GN=GOT1 PE=1 SV=3	GOT1	46.247	3.6	1	1	1	1	3070800
Biological Process	GO:1901652	4	response to peptide	1.89	0.000349774	P19652	Alpha-1-acid glycoprotein 2 OS=Homo sapiens OX=9606 GN=ORM2 PE=1 SV=2	ORM2	23.602	34.8	25	8	6	8	4912700000
Biological Process	GO:1901652	4	response to peptide	1.89	0.000349774	P21281	V-type proton ATPase subunit B, brain isoform OS=Homo sapiens OX=9606 GN=ATP6V1B2 PE=1 SV=3	ATP6V1B2	56.5	0	0	0	0	0	0
Biological Process	GO:1901652	4	response to peptide	1.89	0.000349774	P42224	Signal transducer and activator of transcription 1-alpha/beta OS=Homo sapiens OX=9606 GN=STAT1 PE=1 SV=2	STAT1	87.334	0	0	0	0	0	0
Biological Process	GO:1901652	4	response to peptide	1.89	0.000349774	P49662	Caspase-4 OS=Homo sapiens OX=9606 GN=CASP4 PE=1 SV=1	CASP4	43.262	4	6	1	1	1	29842000
Biological Process	GO:1901652	4	response to peptide	1.89	0.000349774	Q05193	Dynamin-1 OS=Homo sapiens OX=9606 GN=DNM1 PE=1 SV=2	DNM1	97.407	0	0	0	0	0	0
Biological Process	GO:1901652	4	response to peptide	1.89	0.000349774	P61981	14-3-3 protein gamma OS=Homo sapiens OX=9606 GN=YWHAG PE=1 SV=2	YWHAG	28.302	0	0	0	0	0	0
Biological Process	GO:1901652	4	response to peptide	1.89	0.000349774	P80108	Phosphatidylinositol-glycan-specific phospholipase D OS=Homo sapiens OX=9606 GN=GPLD1 PE=1 SV=3	GPLD1	92.335	7.7	5	5	5	5	109680000
Biological Process	GO:1901652	4	response to peptide	1.89	0.000349774	Q92820	Gamma-glutamyl hydrolase OS=Homo sapiens OX=9606 GN=GGH PE=1 SV=2	GGH	35.964	9.4	4	3	3	3	38423000
Biological Process	GO:1901652	4	response to peptide	1.89	0.000349774	P02656	Apolipoprotein C-III OS=Homo sapiens OX=9606 GN=APOC3 PE=1 SV=1	APOC3	10.852	0	0	0	0	0	0
Biological Process	GO:1901652	4	response to peptide	1.89	0.000349774	Q9Y261	Hepatocyte nuclear factor 3-beta OS=Homo sapiens OX=9606 GN=FOXA2 PE=1 SV=1	FOXA2	48.306	0	0	0	0	0	0
Biological Process	GO:1901652	4	response to peptide	1.89	0.000349774	P01019	Angiotensinogen OS=Homo sapiens OX=9606 GN=AGT PE=1 SV=3	AGT	53.154	7.6	3	3	3	3	91548000
Biological Process	GO:1901652	4	response to peptide	1.89	0.000349774	P01009	Alpha-1-antitrypsin OS=Homo sapiens OX=9606 GN=SERPINA1 PE=1 SV=3	SERPINA1	46.736	38.3	20	13	13	13	1081600000
Biological Process	GO:0023051	3	regulation of signaling	1.29	0.000337386	P13598	Intercellular adhesion molecule 2 OS=Homo sapiens OX=9606 GN=ICAM2 PE=1 SV=2	ICAM2	30.654	0	0	0	0	0	0
Biological Process	GO:0023051	3	regulation of signaling	1.29	0.000337386	P48764	Sodium/hydrogen exchanger 3 OS=Homo sapiens OX=9606 GN=SLC9A3 PE=1 SV=2	SLC9A3	92.853	0	0	0	0	0	0
Biological Process	GO:0023051	3	regulation of signaling	1.29	0.000337386	P52566	Rho GDP-dissociation inhibitor 2 OS=Homo sapiens OX=9606 GN=ARHGDIB PE=1 SV=3	ARHGDIB	22.988	0	0	0	0	0	0
Biological Process	GO:0023051	3	regulation of signaling	1.29	0.000337386	P55290	Cadherin-13 OS=Homo sapiens OX=9606 GN=CDH13 PE=1 SV=1	CDH13	78.286	0	0	0	0	0	0
Biological Process	GO:0023051	3	regulation of signaling	1.29	0.000337386	Q02763	Angiopoietin-1 receptor OS=Homo sapiens OX=9606 GN=TEK PE=1 SV=2	TEK	125.83	0	0	0	0	0	0
Biological Process	GO:0023051	3	regulation of signaling	1.29	0.000337386	Q07954	Prolow-density lipoprotein receptor-related protein 1 OS=Homo sapiens OX=9606 GN=LRP1 PE=1 SV=2	LRP1	504.6	0	0	0	0	0	0
Biological Process	GO:0023051	3	regulation of signaling	1.29	0.000337386	Q13573	SNW domain-containing protein 1 OS=Homo sapiens OX=9606 GN=SNW1 PE=1 SV=1	SNW1	61.494	0	0	0	0	0	0
Biological Process	GO:0023051	3	regulation of signaling	1.29	0.000337386	Q9BZF9	Uveal autoantigen with coiled-coil domains and ankyrin repeats OS=Homo sapiens OX=9606 GN=UACA PE=1 SV=2	UACA	162.5	0	0	0	0	0	0
Biological Process	GO:0023051	3	regulation of signaling	1.29	0.000337386	Q9UIQ6	Leucyl-cystinyl aminopeptidase OS=Homo sapiens OX=9606 GN=LNPEP PE=1 SV=3	LNPEP	117.35	0	0	0	0	0	0
Biological Process	GO:0023051	3	regulation of signaling	1.29	0.000337386	O94759	Transient receptor potential cation channel subfamily M member 2 OS=Homo sapiens OX=9606 GN=TRPM2 PE=1 SV=2	TRPM2	171.2	0	0	0	0	0	0
Biological Process	GO:0023051	3	regulation of signaling	1.29	0.000337386	P00746	Complement factor D OS=Homo sapiens OX=9606 GN=CFD PE=1 SV=5	CFD	27.033	0	0	0	0	0	0
Biological Process	GO:0023051	3	regulation of signaling	1.29	0.000337386	P0C0L4	Complement C4-A OS=Homo sapiens OX=9606 GN=C4A PE=1 SV=2	C4A	192.78	0	0	0	0	0	0
Biological Process	GO:0023051	3	regulation of signaling	1.29	0.000337386	P19022	Cadherin-2 OS=Homo sapiens OX=9606 GN=CDH2 PE=1 SV=4	CDH2	99.808	0	0	0	0	0	0
Biological Process	GO:0023051	3	regulation of signaling	1.29	0.000337386	P98174	FYVE, RhoGEF and PH domain-containing protein 1 OS=Homo sapiens OX=9606 GN=FGD1 PE=1 SV=2	FGD1	106.56	0	0	0	0	0	0
Biological Process	GO:0023051	3	regulation of signaling	1.29	0.000337386	Q6IQ55	Tau-tubulin kinase 2 OS=Homo sapiens OX=9606 GN=TTBK2 PE=1 SV=2	TTBK2	137.41	1.1	1	1	1	1	0
Biological Process	GO:0023051	3	regulation of signaling	1.29	0.000337386	Q8IWV7	E3 ubiquitin-protein ligase UBR1 OS=Homo sapiens OX=9606 GN=UBR1 PE=1 SV=1	UBR1	200.21	0	0	0	0	0	0
Biological Process	GO:0023051	3	regulation of signaling	1.29	0.000337386	Q96KB5	Lymphokine-activated killer T-cell-originated protein kinase OS=Homo sapiens OX=9606 GN=PBK PE=1 SV=3	PBK	36.085	0	0	0	0	0	0
Biological Process	GO:0023051	3	regulation of signaling	1.29	0.000337386	Q9H4G4	Golgi-associated plant pathogenesis-related protein 1 OS=Homo sapiens OX=9606 GN=GLIPR2 PE=1 SV=3	GLIPR2	17.218	0	0	0	0	0	0
Biological Process	GO:0023051	3	regulation of signaling	1.29	0.000337386	Q96QA5	Gasdermin-A OS=Homo sapiens OX=9606 GN=GSDMA PE=1 SV=4	GSDMA	49.364	0	0	0	0	0	0
Biological Process	GO:0023051	3	regulation of signaling	1.29	0.000337386	Q13275	Semaphorin-3F OS=Homo sapiens OX=9606 GN=SEMA3F PE=2 SV=2	SEMA3F	88.38	2.7	1	1	1	1	0
Biological Process	GO:1901652	4	response to peptide	1.89	0.000349774	P00738	Haptoglobin OS=Homo sapiens OX=9606 GN=HP PE=1 SV=1	HP	45.205	53.7	182	24	13	24	96502000000
Biological Process	GO:1901652	4	response to peptide	1.89	0.000349774	P00739	Haptoglobin-related protein OS=Homo sapiens OX=9606 GN=HPR PE=2 SV=2	HPR	39.029	34.2	5	14	3	3	169590000
Biological Process	GO:1901652	4	response to peptide	1.89	0.000349774	P00918	Carbonic anhydrase 2 OS=Homo sapiens OX=9606 GN=CA2 PE=1 SV=2	CA2	29.246	0	0	0	0	0	0
Biological Process	GO:1901652	4	response to peptide	1.89	0.000349774	P01011	Alpha-1-antichymotrypsin OS=Homo sapiens OX=9606 GN=SERPINA3 PE=1 SV=2	SERPINA3	47.65	16.8	5	5	5	5	76232000
Biological Process	GO:0023051	3	regulation of signaling	1.29	0.000337386	P01033	Metalloproteinase inhibitor 1 OS=Homo sapiens OX=9606 GN=TIMP1 PE=1 SV=1	TIMP1	23.171	12.1	1	2	2	2	17139000
Biological Process	GO:1901652	4	response to peptide	1.89	0.000349774	P01033	Metalloproteinase inhibitor 1 OS=Homo sapiens OX=9606 GN=TIMP1 PE=1 SV=1	TIMP1	23.171	12.1	1	2	2	2	17139000
Biological Process	GO:1901652	4	response to peptide	1.89	0.000349774	Q9UIQ6	Leucyl-cystinyl aminopeptidase OS=Homo sapiens OX=9606 GN=LNPEP PE=1 SV=3	LNPEP	117.35	0	0	0	0	0	0
Biological Process	GO:1901565	4	organonitrogen compound catabolic process	1.69	0.000358236	P42357	Histidine ammonia-lyase OS=Homo sapiens OX=9606 GN=HAL PE=1 SV=1	HAL	72.697	0	0	0	0	0	0
Biological Process	GO:1901565	4	organonitrogen compound catabolic process	1.69	0.000358236	P51884	Lumican OS=Homo sapiens OX=9606 GN=LUM PE=1 SV=2	LUM	38.429	0	0	0	0	0	0
Biological Process	GO:1901565	4	organonitrogen compound catabolic process	1.69	0.000358236	P53634	Dipeptidyl peptidase 1 OS=Homo sapiens OX=9606 GN=CTSC PE=1 SV=2	CTSC	51.853	0	0	0	0	0	0
Biological Process	GO:1901565	4	organonitrogen compound catabolic process	1.69	0.000358236	P55072	Transitional endoplasmic reticulum ATPase OS=Homo sapiens OX=9606 GN=VCP PE=1 SV=4	VCP	89.321	0	0	0	0	0	0
Biological Process	GO:1901565	4	organonitrogen compound catabolic process	1.69	0.000358236	P55786	Puromycin-sensitive aminopeptidase OS=Homo sapiens OX=9606 GN=NPEPPS PE=1 SV=2	NPEPPS	103.28	0	0	0	0	0	0
Biological Process	GO:1901565	4	organonitrogen compound catabolic process	1.69	0.000358236	Q01459	Di-N-acetylchitobiase OS=Homo sapiens OX=9606 GN=CTBS PE=1 SV=1	CTBS	43.759	11.2	3	3	3	3	48297000
Biological Process	GO:1901565	4	organonitrogen compound catabolic process	1.69	0.000358236	Q5VTR2	E3 ubiquitin-protein ligase BRE1A OS=Homo sapiens OX=9606 GN=RNF20 PE=1 SV=2	RNF20	113.66	0	0	0	0	0	0
Biological Process	GO:1901565	4	organonitrogen compound catabolic process	1.69	0.000358236	Q8NCI6	Beta-galactosidase-1-like protein 3 OS=Homo sapiens OX=9606 GN=GLB1L3 PE=2 SV=3	GLB1L3	74.822	0	0	0	0	0	0
Biological Process	GO:1901565	4	organonitrogen compound catabolic process	1.69	0.000358236	Q8NCQ7	Protein PROCA1 OS=Homo sapiens OX=9606 GN=PROCA1 PE=1 SV=3	PROCA1	40.506	0	0	0	0	0	0
Biological Process	GO:1901565	4	organonitrogen compound catabolic process	1.69	0.000358236	Q96IY4	Carboxypeptidase B2 OS=Homo sapiens OX=9606 GN=CPB2 PE=1 SV=2	CPB2	48.424	16.3	2	3	3	3	43281000
Biological Process	GO:1901565	4	organonitrogen compound catabolic process	1.69	0.000358236	Q9UI42	Carboxypeptidase A4 OS=Homo sapiens OX=9606 GN=CPA4 PE=1 SV=2	CPA4	47.351	0	0	0	0	0	0
Biological Process	GO:1901565	4	organonitrogen compound catabolic process	1.69	0.000358236	Q9Y646	Carboxypeptidase Q OS=Homo sapiens OX=9606 GN=CPQ PE=1 SV=1	CPQ	51.887	4.7	2	2	2	2	8654900
Biological Process	GO:1901565	4	organonitrogen compound catabolic process	1.69	0.000358236	P48764	Sodium/hydrogen exchanger 3 OS=Homo sapiens OX=9606 GN=SLC9A3 PE=1 SV=2	SLC9A3	92.853	0	0	0	0	0	0
Biological Process	GO:1901565	4	organonitrogen compound catabolic process	1.69	0.000358236	Q9H0E7	Ubiquitin carboxyl-terminal hydrolase 44 OS=Homo sapiens OX=9606 GN=USP44 PE=1 SV=2	USP44	81.184	0	0	0	0	0	0
Biological Process	GO:1901565	4	organonitrogen compound catabolic process	1.69	0.000358236	Q9UIQ6	Leucyl-cystinyl aminopeptidase OS=Homo sapiens OX=9606 GN=LNPEP PE=1 SV=3	LNPEP	117.35	0	0	0	0	0	0
Biological Process	GO:1901565	4	organonitrogen compound catabolic process	1.69	0.000358236	P00746	Complement factor D OS=Homo sapiens OX=9606 GN=CFD PE=1 SV=5	CFD	27.033	0	0	0	0	0	0
Biological Process	GO:1901565	4	organonitrogen compound catabolic process	1.69	0.000358236	P13473	Lysosome-associated membrane glycoprotein 2 OS=Homo sapiens OX=9606 GN=LAMP2 PE=1 SV=2	LAMP2	44.96	0	0	0	0	0	0
Biological Process	GO:1901565	4	organonitrogen compound catabolic process	1.69	0.000358236	P54802	Alpha-N-acetylglucosaminidase OS=Homo sapiens OX=9606 GN=NAGLU PE=1 SV=2	NAGLU	82.265	0	0	0	0	0	0
Biological Process	GO:1901565	4	organonitrogen compound catabolic process	1.69	0.000358236	Q07075	Glutamyl aminopeptidase OS=Homo sapiens OX=9606 GN=ENPEP PE=1 SV=3	ENPEP	109.24	0	0	0	0	0	0
Biological Process	GO:1901565	4	organonitrogen compound catabolic process	1.69	0.000358236	Q8IWV7	E3 ubiquitin-protein ligase UBR1 OS=Homo sapiens OX=9606 GN=UBR1 PE=1 SV=1	UBR1	200.21	0	0	0	0	0	0
Biological Process	GO:1901565	4	organonitrogen compound catabolic process	1.69	0.000358236	Q9Y5Y7	Lymphatic vessel endothelial hyaluronic acid receptor 1 OS=Homo sapiens OX=9606 GN=LYVE1 PE=1 SV=2	LYVE1	35.213	3.4	1	1	1	1	10091000
Biological Process	GO:0009895	5	negative regulation of catabolic process	2.16	0.000362476	O00391	Sulfhydryl oxidase 1 OS=Homo sapiens OX=9606 GN=QSOX1 PE=1 SV=3	QSOX1	82.577	3.2	2	2	2	2	20083000
Biological Process	GO:0009895	5	negative regulation of catabolic process	2.16	0.000362476	P00533	Epidermal growth factor receptor OS=Homo sapiens OX=9606 GN=EGFR PE=1 SV=2	EGFR	134.28	0	0	0	0	0	0
Biological Process	GO:1901565	4	organonitrogen compound catabolic process	1.69	0.000358236	P27487	Dipeptidyl peptidase 4 OS=Homo sapiens OX=9606 GN=DPP4 PE=1 SV=2	DPP4	88.278	15	7	8	8	8	79452000
Biological Process	GO:1901652	4	response to peptide	1.89	0.000349774	Q07954	Prolow-density lipoprotein receptor-related protein 1 OS=Homo sapiens OX=9606 GN=LRP1 PE=1 SV=2	LRP1	504.6	0	0	0	0	0	0
Biological Process	GO:1901565	4	organonitrogen compound catabolic process	1.69	0.000358236	P23526	Adenosylhomocysteinase OS=Homo sapiens OX=9606 GN=AHCY PE=1 SV=4	AHCY	47.716	0	0	0	0	0	0
Biological Process	GO:1901565	4	organonitrogen compound catabolic process	1.69	0.000358236	P17174	Aspartate aminotransferase, cytoplasmic OS=Homo sapiens OX=9606 GN=GOT1 PE=1 SV=3	GOT1	46.247	3.6	1	1	1	1	3070800
Biological Process	GO:1901565	4	organonitrogen compound catabolic process	1.69	0.000358236	O00327	Basic helix-loop-helix ARNT-like protein 1 OS=Homo sapiens OX=9606 GN=BMAL1 PE=1 SV=2	BMAL1	68.761	0	0	0	0	0	0
Biological Process	GO:1901565	4	organonitrogen compound catabolic process	1.69	0.000358236	O14818	Proteasome subunit alpha type-7 OS=Homo sapiens OX=9606 GN=PSMA7 PE=1 SV=1	PSMA7	27.887	0	0	0	0	0	0
Biological Process	GO:1901565	4	organonitrogen compound catabolic process	1.69	0.000358236	O75608	Acyl-protein thioesterase 1 OS=Homo sapiens OX=9606 GN=LYPLA1 PE=1 SV=1	LYPLA1	24.669	0	0	0	0	0	0
Biological Process	GO:1901565	4	organonitrogen compound catabolic process	1.69	0.000358236	P00441	Superoxide dismutase [Cu-Zn] OS=Homo sapiens OX=9606 GN=SOD1 PE=1 SV=2	SOD1	15.936	0	0	0	0	0	0
Biological Process	GO:1901565	4	organonitrogen compound catabolic process	1.69	0.000358236	P00505	Aspartate aminotransferase, mitochondrial OS=Homo sapiens OX=9606 GN=GOT2 PE=1 SV=3	GOT2	47.517	0	0	0	0	0	0
Biological Process	GO:1901565	4	organonitrogen compound catabolic process	1.69	0.000358236	P02760	Protein AMBP OS=Homo sapiens OX=9606 GN=AMBP PE=1 SV=1	AMBP	38.999	31	10	8	8	8	794190000
Biological Process	GO:1901565	4	organonitrogen compound catabolic process	1.69	0.000358236	P05089	Arginase-1 OS=Homo sapiens OX=9606 GN=ARG1 PE=1 SV=2	ARG1	34.735	8.4	5	3	3	3	32997000
Biological Process	GO:1901565	4	organonitrogen compound catabolic process	1.69	0.000358236	P06276	Cholinesterase OS=Homo sapiens OX=9606 GN=BCHE PE=1 SV=1	BCHE	68.417	5.1	2	2	2	2	90413000
Biological Process	GO:1901565	4	organonitrogen compound catabolic process	1.69	0.000358236	P07339	Cathepsin D OS=Homo sapiens OX=9606 GN=CTSD PE=1 SV=1	CTSD	44.552	9.7	4	3	3	3	29548000
Biological Process	GO:1901565	4	organonitrogen compound catabolic process	1.69	0.000358236	P07355	Annexin A2 OS=Homo sapiens OX=9606 GN=ANXA2 PE=1 SV=2	ANXA2	38.604	15.3	4	4	4	4	8350100
Biological Process	GO:1901565	4	organonitrogen compound catabolic process	1.69	0.000358236	P07384	Calpain-1 catalytic subunit OS=Homo sapiens OX=9606 GN=CAPN1 PE=1 SV=1	CAPN1	81.889	0	0	0	0	0	0
Biological Process	GO:1901565	4	organonitrogen compound catabolic process	1.69	0.000358236	P08238	Heat shock protein HSP 90-beta OS=Homo sapiens OX=9606 GN=HSP90AB1 PE=1 SV=4	HSP90AB1	83.263	0	0	0	0	0	0
Biological Process	GO:1901565	4	organonitrogen compound catabolic process	1.69	0.000358236	P09601	Heme oxygenase 1 OS=Homo sapiens OX=9606 GN=HMOX1 PE=1 SV=1	HMOX1	32.818	0	0	0	0	0	0
Biological Process	GO:1901565	4	organonitrogen compound catabolic process	1.69	0.000358236	P62987	Ubiquitin-60S ribosomal protein L40 OS=Homo sapiens OX=9606 GN=UBA52 PE=1 SV=2	UBA52	14.728	39.1	7	6	6	6	90657000
Biological Process	GO:1901565	4	organonitrogen compound catabolic process	1.69	0.000358236	P11021	Endoplasmic reticulum chaperone BiP OS=Homo sapiens OX=9606 GN=HSPA5 PE=1 SV=2	HSPA5	72.332	0	0	0	0	0	0
Biological Process	GO:1901565	4	organonitrogen compound catabolic process	1.69	0.000358236	P11142	Heat shock cognate 71 kDa protein OS=Homo sapiens OX=9606 GN=HSPA8 PE=1 SV=1	HSPA8	70.897	0	0	0	0	0	0
Biological Process	GO:1901565	4	organonitrogen compound catabolic process	1.69	0.000358236	P14635	G2/mitotic-specific cyclin-B1 OS=Homo sapiens OX=9606 GN=CCNB1 PE=1 SV=1	CCNB1	48.337	0	0	0	0	0	0
Biological Process	GO:1901565	4	organonitrogen compound catabolic process	1.69	0.000358236	P14735	Insulin-degrading enzyme OS=Homo sapiens OX=9606 GN=IDE PE=1 SV=4	IDE	117.97	0	0	0	0	0	0
Biological Process	GO:1901565	4	organonitrogen compound catabolic process	1.69	0.000358236	P15104	Glutamine synthetase OS=Homo sapiens OX=9606 GN=GLUL PE=1 SV=4	GLUL	42.064	0	0	0	0	0	0
Biological Process	GO:1901565	4	organonitrogen compound catabolic process	1.69	0.000358236	P15144	Aminopeptidase N OS=Homo sapiens OX=9606 GN=ANPEP PE=1 SV=4	ANPEP	109.54	2.8	2	2	2	2	31204000
Biological Process	GO:1901565	4	organonitrogen compound catabolic process	1.69	0.000358236	P15169	Carboxypeptidase N catalytic chain OS=Homo sapiens OX=9606 GN=CPN1 PE=1 SV=1	CPN1	52.286	0	0	0	0	0	0
Biological Process	GO:1901565	4	organonitrogen compound catabolic process	1.69	0.000358236	P16070	CD44 antigen OS=Homo sapiens OX=9606 GN=CD44 PE=1 SV=3	CD44	81.537	3	2	2	2	2	118550000
Biological Process	GO:1901565	4	organonitrogen compound catabolic process	1.69	0.000358236	P16930	Fumarylacetoacetase OS=Homo sapiens OX=9606 GN=FAH PE=1 SV=2	FAH	46.374	9.3	3	3	3	3	8327800
Biological Process	GO:1901565	4	organonitrogen compound catabolic process	1.69	0.000358236	P19971	Thymidine phosphorylase OS=Homo sapiens OX=9606 GN=TYMP PE=1 SV=2	TYMP	49.955	0	0	0	0	0	0
Biological Process	GO:0009895	5	negative regulation of catabolic process	2.16	0.000362476	P00738	Haptoglobin OS=Homo sapiens OX=9606 GN=HP PE=1 SV=1	HP	45.205	53.7	182	24	13	24	96502000000
Biological Process	GO:0023051	3	regulation of signaling	1.29	0.000337386	O75553	Disabled homolog 1 OS=Homo sapiens OX=9606 GN=DAB1 PE=1 SV=3	DAB1	63.774	0	0	0	0	0	0
Biological Process	GO:0023051	3	regulation of signaling	1.29	0.000337386	Q9Y3M8	StAR-related lipid transfer protein 13 OS=Homo sapiens OX=9606 GN=STARD13 PE=1 SV=2	STARD13	124.97	0	0	0	0	0	0
Biological Process	GO:0023051	3	regulation of signaling	1.29	0.000337386	P09619	Platelet-derived growth factor receptor beta OS=Homo sapiens OX=9606 GN=PDGFRB PE=1 SV=1	PDGFRB	123.97	2.9	3	2	2	2	4182400
Biological Process	GO:0023051	3	regulation of signaling	1.29	0.000337386	P0C0L5	Complement C4-B OS=Homo sapiens OX=9606 GN=C4B_2 PE=1 SV=2	C4B_2	192.75	2.9	4	3	3	3	50961000
Biological Process	GO:0023051	3	regulation of signaling	1.29	0.000337386	P62987	Ubiquitin-60S ribosomal protein L40 OS=Homo sapiens OX=9606 GN=UBA52 PE=1 SV=2	UBA52	14.728	39.1	7	6	6	6	90657000
Biological Process	GO:0023051	3	regulation of signaling	1.29	0.000337386	P0DMV9	Heat shock 70 kDa protein 1B OS=Homo sapiens OX=9606 GN=HSPA1B PE=1 SV=1	HSPA1B	70.051	0	0	0	0	0	0
Biological Process	GO:0023051	3	regulation of signaling	1.29	0.000337386	P10599	Thioredoxin OS=Homo sapiens OX=9606 GN=TXN PE=1 SV=3	TXN	11.737	0	0	0	0	0	0
Biological Process	GO:0023051	3	regulation of signaling	1.29	0.000337386	P11021	Endoplasmic reticulum chaperone BiP OS=Homo sapiens OX=9606 GN=HSPA5 PE=1 SV=2	HSPA5	72.332	0	0	0	0	0	0
Biological Process	GO:0023051	3	regulation of signaling	1.29	0.000337386	P11142	Heat shock cognate 71 kDa protein OS=Homo sapiens OX=9606 GN=HSPA8 PE=1 SV=1	HSPA8	70.897	0	0	0	0	0	0
Biological Process	GO:0023051	3	regulation of signaling	1.29	0.000337386	P12830	Cadherin-1 OS=Homo sapiens OX=9606 GN=CDH1 PE=1 SV=3	CDH1	97.455	1.8	2	2	2	2	7974000
Biological Process	GO:0023051	3	regulation of signaling	1.29	0.000337386	P14174	Macrophage migration inhibitory factor OS=Homo sapiens OX=9606 GN=MIF PE=1 SV=4	MIF	12.476	0	0	0	0	0	0
Biological Process	GO:0023051	3	regulation of signaling	1.29	0.000337386	P14735	Insulin-degrading enzyme OS=Homo sapiens OX=9606 GN=IDE PE=1 SV=4	IDE	117.97	0	0	0	0	0	0
Biological Process	GO:0023051	3	regulation of signaling	1.29	0.000337386	P14923	Junction plakoglobin OS=Homo sapiens OX=9606 GN=JUP PE=1 SV=3	JUP	81.744	7.2	3	3	3	3	11408000
Biological Process	GO:0023051	3	regulation of signaling	1.29	0.000337386	P15104	Glutamine synthetase OS=Homo sapiens OX=9606 GN=GLUL PE=1 SV=4	GLUL	42.064	0	0	0	0	0	0
Biological Process	GO:0023051	3	regulation of signaling	1.29	0.000337386	P15291	Beta-1,4-galactosyltransferase 1 OS=Homo sapiens OX=9606 GN=B4GALT1 PE=1 SV=5	B4GALT1	43.92	0	0	0	0	0	0
Biological Process	GO:0023051	3	regulation of signaling	1.29	0.000337386	P15309	Prostatic acid phosphatase OS=Homo sapiens OX=9606 GN=ACP3 PE=1 SV=3	ACP3	44.566	0	0	0	0	0	0
Biological Process	GO:0023051	3	regulation of signaling	1.29	0.000337386	P16070	CD44 antigen OS=Homo sapiens OX=9606 GN=CD44 PE=1 SV=3	CD44	81.537	3	2	2	2	2	118550000
Biological Process	GO:0023051	3	regulation of signaling	1.29	0.000337386	P16885	1-phosphatidylinositol 4,5-bisphosphate phosphodiesterase gamma-2 OS=Homo sapiens OX=9606 GN=PLCG2 PE=1 SV=4	PLCG2	147.87	0	0	0	0	0	0
Biological Process	GO:0023051	3	regulation of signaling	1.29	0.000337386	P17174	Aspartate aminotransferase, cytoplasmic OS=Homo sapiens OX=9606 GN=GOT1 PE=1 SV=3	GOT1	46.247	3.6	1	1	1	1	3070800
Biological Process	GO:0023051	3	regulation of signaling	1.29	0.000337386	P17813	Endoglin OS=Homo sapiens OX=9606 GN=ENG PE=1 SV=2	ENG	70.577	0	0	0	0	0	0
Biological Process	GO:0023051	3	regulation of signaling	1.29	0.000337386	P17931	Galectin-3 OS=Homo sapiens OX=9606 GN=LGALS3 PE=1 SV=5	LGALS3	26.152	0	0	0	0	0	0
Biological Process	GO:0023051	3	regulation of signaling	1.29	0.000337386	P18510	Interleukin-1 receptor antagonist protein OS=Homo sapiens OX=9606 GN=IL1RN PE=1 SV=1	IL1RN	20.055	0	0	0	0	0	0
Biological Process	GO:0023051	3	regulation of signaling	1.29	0.000337386	P19784	Casein kinase II subunit alpha' OS=Homo sapiens OX=9606 GN=CSNK2A2 PE=1 SV=1	CSNK2A2	41.213	0	0	0	0	0	0
Biological Process	GO:0023051	3	regulation of signaling	1.29	0.000337386	P19971	Thymidine phosphorylase OS=Homo sapiens OX=9606 GN=TYMP PE=1 SV=2	TYMP	49.955	0	0	0	0	0	0
Biological Process	GO:0023051	3	regulation of signaling	1.29	0.000337386	P20020	Plasma membrane calcium-transporting ATPase 1 OS=Homo sapiens OX=9606 GN=ATP2B1 PE=1 SV=4	ATP2B1	134.68	0	0	0	0	0	0
Biological Process	GO:0023051	3	regulation of signaling	1.29	0.000337386	P09601	Heme oxygenase 1 OS=Homo sapiens OX=9606 GN=HMOX1 PE=1 SV=1	HMOX1	32.818	0	0	0	0	0	0
Biological Process	GO:0023051	3	regulation of signaling	1.29	0.000337386	P21333	Filamin-A OS=Homo sapiens OX=9606 GN=FLNA PE=1 SV=4	FLNA	280.74	0	0	0	0	0	0
Biological Process	GO:0023051	3	regulation of signaling	1.29	0.000337386	P09211	Glutathione S-transferase P OS=Homo sapiens OX=9606 GN=GSTP1 PE=1 SV=2	GSTP1	23.356	0	0	0	0	0	0
Biological Process	GO:0023051	3	regulation of signaling	1.29	0.000337386	P08571	Monocyte differentiation antigen CD14 OS=Homo sapiens OX=9606 GN=CD14 PE=1 SV=2	CD14	40.076	6.9	4	2	2	2	41719000
Biological Process	GO:0023051	3	regulation of signaling	1.29	0.000337386	P02760	Protein AMBP OS=Homo sapiens OX=9606 GN=AMBP PE=1 SV=1	AMBP	38.999	31	10	8	8	8	794190000
Biological Process	GO:0023051	3	regulation of signaling	1.29	0.000337386	P02765	Alpha-2-HS-glycoprotein OS=Homo sapiens OX=9606 GN=AHSG PE=1 SV=2	AHSG	39.34	23.2	41	7	7	7	4512000000
Biological Process	GO:0023051	3	regulation of signaling	1.29	0.000337386	P02787	Serotransferrin OS=Homo sapiens OX=9606 GN=TF PE=1 SV=4	TF	77.049	60.5	160	43	43	43	50131000000
Biological Process	GO:0023051	3	regulation of signaling	1.29	0.000337386	P02788	Lactotransferrin OS=Homo sapiens OX=9606 GN=LTF PE=1 SV=6	LTF	78.181	16.3	11	9	9	9	133970000
Biological Process	GO:0023051	3	regulation of signaling	1.29	0.000337386	P02790	Hemopexin OS=Homo sapiens OX=9606 GN=HPX PE=1 SV=2	HPX	51.676	63	99	20	20	20	81563000000
Biological Process	GO:0023051	3	regulation of signaling	1.29	0.000337386	P04040	Catalase OS=Homo sapiens OX=9606 GN=CAT PE=1 SV=3	CAT	59.755	8.7	2	2	2	2	7648000
Biological Process	GO:0023051	3	regulation of signaling	1.29	0.000337386	P04083	Annexin A1 OS=Homo sapiens OX=9606 GN=ANXA1 PE=1 SV=2	ANXA1	38.714	0	0	0	0	0	0
Biological Process	GO:0023051	3	regulation of signaling	1.29	0.000337386	P04792	Heat shock protein beta-1 OS=Homo sapiens OX=9606 GN=HSPB1 PE=1 SV=2	HSPB1	22.782	7.8	1	1	1	1	1730200
Biological Process	GO:0023051	3	regulation of signaling	1.29	0.000337386	P05089	Arginase-1 OS=Homo sapiens OX=9606 GN=ARG1 PE=1 SV=2	ARG1	34.735	8.4	5	3	3	3	32997000
Biological Process	GO:0023051	3	regulation of signaling	1.29	0.000337386	P05090	Apolipoprotein D OS=Homo sapiens OX=9606 GN=APOD PE=1 SV=1	APOD	21.275	25.9	14	4	4	4	463060000
Biological Process	GO:0023051	3	regulation of signaling	1.29	0.000337386	P05109	Protein S100-A8 OS=Homo sapiens OX=9606 GN=S100A8 PE=1 SV=1	S100A8	10.834	0	0	0	0	0	0
Biological Process	GO:0023051	3	regulation of signaling	1.29	0.000337386	P05362	Intercellular adhesion molecule 1 OS=Homo sapiens OX=9606 GN=ICAM1 PE=1 SV=2	ICAM1	57.825	0	0	0	0	0	0
Biological Process	GO:0023051	3	regulation of signaling	1.29	0.000337386	P05556	Integrin beta-1 OS=Homo sapiens OX=9606 GN=ITGB1 PE=1 SV=2	ITGB1	88.414	0	0	0	0	0	0
Biological Process	GO:0023051	3	regulation of signaling	1.29	0.000337386	P06276	Cholinesterase OS=Homo sapiens OX=9606 GN=BCHE PE=1 SV=1	BCHE	68.417	5.1	2	2	2	2	90413000
Biological Process	GO:0023051	3	regulation of signaling	1.29	0.000337386	P06396	Gelsolin OS=Homo sapiens OX=9606 GN=GSN PE=1 SV=1	GSN	85.696	0	0	0	0	0	0
Biological Process	GO:0023051	3	regulation of signaling	1.29	0.000337386	P06702	Protein S100-A9 OS=Homo sapiens OX=9606 GN=S100A9 PE=1 SV=1	S100A9	13.242	43	4	3	3	3	31021000
Biological Process	GO:0023051	3	regulation of signaling	1.29	0.000337386	P06733	Alpha-enolase OS=Homo sapiens OX=9606 GN=ENO1 PE=1 SV=2	ENO1	47.168	4.4	1	1	1	1	3345600
Biological Process	GO:0023051	3	regulation of signaling	1.29	0.000337386	P07108	Acyl-CoA-binding protein OS=Homo sapiens OX=9606 GN=DBI PE=1 SV=2	DBI	10.044	0	0	0	0	0	0
Biological Process	GO:0023051	3	regulation of signaling	1.29	0.000337386	P07333	Macrophage colony-stimulating factor 1 receptor OS=Homo sapiens OX=9606 GN=CSF1R PE=1 SV=2	CSF1R	107.98	2.2	2	2	2	2	24589000
Biological Process	GO:0023051	3	regulation of signaling	1.29	0.000337386	P07355	Annexin A2 OS=Homo sapiens OX=9606 GN=ANXA2 PE=1 SV=2	ANXA2	38.604	15.3	4	4	4	4	8350100
Biological Process	GO:0023051	3	regulation of signaling	1.29	0.000337386	P07359	Platelet glycoprotein Ib alpha chain OS=Homo sapiens OX=9606 GN=GP1BA PE=1 SV=2	GP1BA	71.539	0	0	0	0	0	0
Biological Process	GO:0023051	3	regulation of signaling	1.29	0.000337386	P07384	Calpain-1 catalytic subunit OS=Homo sapiens OX=9606 GN=CAPN1 PE=1 SV=1	CAPN1	81.889	0	0	0	0	0	0
Biological Process	GO:0023051	3	regulation of signaling	1.29	0.000337386	P08238	Heat shock protein HSP 90-beta OS=Homo sapiens OX=9606 GN=HSP90AB1 PE=1 SV=4	HSP90AB1	83.263	0	0	0	0	0	0
Biological Process	GO:0023051	3	regulation of signaling	1.29	0.000337386	P08697	Alpha-2-antiplasmin OS=Homo sapiens OX=9606 GN=SERPINF2 PE=1 SV=3	SERPINF2	54.565	17.9	7	6	6	6	283750000
Biological Process	GO:0023051	3	regulation of signaling	1.29	0.000337386	O75340	Programmed cell death protein 6 OS=Homo sapiens OX=9606 GN=PDCD6 PE=1 SV=1	PDCD6	21.868	0	0	0	0	0	0
Biological Process	GO:0023051	3	regulation of signaling	1.29	0.000337386	P27487	Dipeptidyl peptidase 4 OS=Homo sapiens OX=9606 GN=DPP4 PE=1 SV=2	DPP4	88.278	15	7	8	8	8	79452000
Biological Process	GO:0023051	3	regulation of signaling	1.29	0.000337386	P29508	Serpin B3 OS=Homo sapiens OX=9606 GN=SERPINB3 PE=1 SV=2	SERPINB3	44.564	0	0	0	0	0	0
Biological Process	GO:0023051	3	regulation of signaling	1.29	0.000337386	P80108	Phosphatidylinositol-glycan-specific phospholipase D OS=Homo sapiens OX=9606 GN=GPLD1 PE=1 SV=3	GPLD1	92.335	7.7	5	5	5	5	109680000
Biological Process	GO:0023051	3	regulation of signaling	1.29	0.000337386	P80511	Protein S100-A12 OS=Homo sapiens OX=9606 GN=S100A12 PE=1 SV=2	S100A12	10.575	0	0	0	0	0	0
Biological Process	GO:0023051	3	regulation of signaling	1.29	0.000337386	Q01469	Fatty acid-binding protein 5 OS=Homo sapiens OX=9606 GN=FABP5 PE=1 SV=3	FABP5	15.164	0	0	0	0	0	0
Biological Process	GO:0023051	3	regulation of signaling	1.29	0.000337386	Q06830	Peroxiredoxin-1 OS=Homo sapiens OX=9606 GN=PRDX1 PE=1 SV=1	PRDX1	22.11	9	1	1	1	1	1860400
Biological Process	GO:0023051	3	regulation of signaling	1.29	0.000337386	Q10588	ADP-ribosyl cyclase/cyclic ADP-ribose hydrolase 2 OS=Homo sapiens OX=9606 GN=BST1 PE=1 SV=2	BST1	35.724	7.9	2	2	2	2	26770000
Biological Process	GO:0023051	3	regulation of signaling	1.29	0.000337386	Q12913	Receptor-type tyrosine-protein phosphatase eta OS=Homo sapiens OX=9606 GN=PTPRJ PE=1 SV=3	PTPRJ	145.94	2.7	3	3	3	3	26199000
Biological Process	GO:0023051	3	regulation of signaling	1.29	0.000337386	Q14764	Major vault protein OS=Homo sapiens OX=9606 GN=MVP PE=1 SV=4	MVP	99.326	0	0	0	0	0	0
Biological Process	GO:0023051	3	regulation of signaling	1.29	0.000337386	Q15149	Plectin OS=Homo sapiens OX=9606 GN=PLEC PE=1 SV=3	PLEC	531.78	0	0	0	0	0	0
Biological Process	GO:0023051	3	regulation of signaling	1.29	0.000337386	Q15648	Mediator of RNA polymerase II transcription subunit 1 OS=Homo sapiens OX=9606 GN=MED1 PE=1 SV=4	MED1	168.48	0	0	0	0	0	0
Biological Process	GO:0023051	3	regulation of signaling	1.29	0.000337386	Q66K66	Transmembrane protein 198 OS=Homo sapiens OX=9606 GN=TMEM198 PE=1 SV=1	TMEM198	39.474	2.5	8	2	2	2	3627900000
Biological Process	GO:0023051	3	regulation of signaling	1.29	0.000337386	Q6EMK4	Vasorin OS=Homo sapiens OX=9606 GN=VASN PE=1 SV=1	VASN	71.712	9.5	5	5	5	5	43527000
Biological Process	GO:0023051	3	regulation of signaling	1.29	0.000337386	Q86SG5	Protein S100-A7A OS=Homo sapiens OX=9606 GN=S100A7A PE=1 SV=3	S100A7A	11.305	0	0	0	0	0	0
Biological Process	GO:0023051	3	regulation of signaling	1.29	0.000337386	Q8NEV4	Myosin-IIIa OS=Homo sapiens OX=9606 GN=MYO3A PE=1 SV=2	MYO3A	186.21	0	0	0	0	0	0
Biological Process	GO:0023051	3	regulation of signaling	1.29	0.000337386	Q8TDY2	RB1-inducible coiled-coil protein 1 OS=Homo sapiens OX=9606 GN=RB1CC1 PE=1 SV=3	RB1CC1	183.09	0	0	0	0	0	0
Biological Process	GO:0023051	3	regulation of signaling	1.29	0.000337386	Q92876	Kallikrein-6 OS=Homo sapiens OX=9606 GN=KLK6 PE=1 SV=1	KLK6	26.855	0	0	0	0	0	0
Biological Process	GO:0023051	3	regulation of signaling	1.29	0.000337386	Q969H8	Myeloid-derived growth factor OS=Homo sapiens OX=9606 GN=MYDGF PE=1 SV=1	MYDGF	18.795	0	0	0	0	0	0
Biological Process	GO:0023051	3	regulation of signaling	1.29	0.000337386	Q96EP0	E3 ubiquitin-protein ligase RNF31 OS=Homo sapiens OX=9606 GN=RNF31 PE=1 SV=1	RNF31	119.65	0	0	0	0	0	0
Biological Process	GO:0023051	3	regulation of signaling	1.29	0.000337386	Q96P63	Serpin B12 OS=Homo sapiens OX=9606 GN=SERPINB12 PE=1 SV=1	SERPINB12	46.276	3	1	1	1	1	3836800
Biological Process	GO:0023051	3	regulation of signaling	1.29	0.000337386	Q9HCD5	Nuclear receptor coactivator 5 OS=Homo sapiens OX=9606 GN=NCOA5 PE=1 SV=2	NCOA5	65.536	0	0	0	0	0	0
Biological Process	GO:0023051	3	regulation of signaling	1.29	0.000337386	Q9NZH8	Interleukin-36 gamma OS=Homo sapiens OX=9606 GN=IL36G PE=1 SV=1	IL36G	18.721	10.7	1	1	1	1	0
Biological Process	GO:0023051	3	regulation of signaling	1.29	0.000337386	Q9UHA4	Ragulator complex protein LAMTOR3 OS=Homo sapiens OX=9606 GN=LAMTOR3 PE=1 SV=1	LAMTOR3	13.623	0	0	0	0	0	0
Biological Process	GO:0023051	3	regulation of signaling	1.29	0.000337386	Q9UIV8	Serpin B13 OS=Homo sapiens OX=9606 GN=SERPINB13 PE=1 SV=2	SERPINB13	44.276	0	0	0	0	0	0
Biological Process	GO:0023051	3	regulation of signaling	1.29	0.000337386	Q9Y261	Hepatocyte nuclear factor 3-beta OS=Homo sapiens OX=9606 GN=FOXA2 PE=1 SV=1	FOXA2	48.306	0	0	0	0	0	0
Biological Process	GO:0023051	3	regulation of signaling	1.29	0.000337386	P78417	Glutathione S-transferase omega-1 OS=Homo sapiens OX=9606 GN=GSTO1 PE=1 SV=2	GSTO1	27.566	0	0	0	0	0	0
Biological Process	GO:0023051	3	regulation of signaling	1.29	0.000337386	P28676	Grancalcin OS=Homo sapiens OX=9606 GN=GCA PE=1 SV=2	GCA	24.01	0	0	0	0	0	0
Biological Process	GO:0023051	3	regulation of signaling	1.29	0.000337386	P63244	Receptor of activated protein C kinase 1 OS=Homo sapiens OX=9606 GN=RACK1 PE=1 SV=3	RACK1	35.076	0	0	0	0	0	0
Biological Process	GO:0023051	3	regulation of signaling	1.29	0.000337386	P62258	14-3-3 protein epsilon OS=Homo sapiens OX=9606 GN=YWHAE PE=1 SV=1	YWHAE	29.174	0	0	0	0	0	0
Biological Process	GO:0023051	3	regulation of signaling	1.29	0.000337386	P30086	Phosphatidylethanolamine-binding protein 1 OS=Homo sapiens OX=9606 GN=PEBP1 PE=1 SV=3	PEBP1	21.057	0	0	0	0	0	0
Biological Process	GO:0023051	3	regulation of signaling	1.29	0.000337386	P30101	Protein disulfide-isomerase A3 OS=Homo sapiens OX=9606 GN=PDIA3 PE=1 SV=4	PDIA3	56.782	0	0	0	0	0	0
Biological Process	GO:0023051	3	regulation of signaling	1.29	0.000337386	P30530	Tyrosine-protein kinase receptor UFO OS=Homo sapiens OX=9606 GN=AXL PE=1 SV=4	AXL	98.336	0	0	0	0	0	0
Biological Process	GO:0023051	3	regulation of signaling	1.29	0.000337386	P30740	Leukocyte elastase inhibitor OS=Homo sapiens OX=9606 GN=SERPINB1 PE=1 SV=1	SERPINB1	42.741	0	0	0	0	0	0
Biological Process	GO:0023051	3	regulation of signaling	1.29	0.000337386	P31151	Protein S100-A7 OS=Homo sapiens OX=9606 GN=S100A7 PE=1 SV=4	S100A7	11.471	14.9	5	3	3	3	18159000
Biological Process	GO:0023051	3	regulation of signaling	1.29	0.000337386	P31947	14-3-3 protein sigma OS=Homo sapiens OX=9606 GN=SFN PE=1 SV=1	SFN	27.774	0	0	0	0	0	0
Biological Process	GO:0023051	3	regulation of signaling	1.29	0.000337386	P32119	Peroxiredoxin-2 OS=Homo sapiens OX=9606 GN=PRDX2 PE=1 SV=5	PRDX2	21.892	0	0	0	0	0	0
Biological Process	GO:0023051	3	regulation of signaling	1.29	0.000337386	P35232	Prohibitin 1 OS=Homo sapiens OX=9606 GN=PHB1 PE=1 SV=1	PHB1	29.804	0	0	0	0	0	0
Biological Process	GO:0023051	3	regulation of signaling	1.29	0.000337386	P35542	Serum amyloid A-4 protein OS=Homo sapiens OX=9606 GN=SAA4 PE=1 SV=2	SAA4	14.746	20	2	2	2	2	19153000
Biological Process	GO:0023051	3	regulation of signaling	1.29	0.000337386	P35579	Myosin-9 OS=Homo sapiens OX=9606 GN=MYH9 PE=1 SV=4	MYH9	226.53	1.8	2	2	2	2	2939500
Biological Process	GO:0023051	3	regulation of signaling	1.29	0.000337386	P42224	Signal transducer and activator of transcription 1-alpha/beta OS=Homo sapiens OX=9606 GN=STAT1 PE=1 SV=2	STAT1	87.334	0	0	0	0	0	0
Biological Process	GO:0023051	3	regulation of signaling	1.29	0.000337386	P43490	Nicotinamide phosphoribosyltransferase OS=Homo sapiens OX=9606 GN=NAMPT PE=1 SV=1	NAMPT	55.52	0	0	0	0	0	0
Biological Process	GO:0023051	3	regulation of signaling	1.29	0.000337386	P46939	Utrophin OS=Homo sapiens OX=9606 GN=UTRN PE=1 SV=2	UTRN	394.46	0.5	1	1	1	1	0
Biological Process	GO:0023051	3	regulation of signaling	1.29	0.000337386	P47756	F-actin-capping protein subunit beta OS=Homo sapiens OX=9606 GN=CAPZB PE=1 SV=5	CAPZB	30.628	0	0	0	0	0	0
Biological Process	GO:0023051	3	regulation of signaling	1.29	0.000337386	P49662	Caspase-4 OS=Homo sapiens OX=9606 GN=CASP4 PE=1 SV=1	CASP4	43.262	4	6	1	1	1	29842000
Biological Process	GO:0023051	3	regulation of signaling	1.29	0.000337386	P50395	Rab GDP dissociation inhibitor beta OS=Homo sapiens OX=9606 GN=GDI2 PE=1 SV=2	GDI2	50.663	0	0	0	0	0	0
Biological Process	GO:0023051	3	regulation of signaling	1.29	0.000337386	Q05193	Dynamin-1 OS=Homo sapiens OX=9606 GN=DNM1 PE=1 SV=2	DNM1	97.407	0	0	0	0	0	0
Biological Process	GO:0023051	3	regulation of signaling	1.29	0.000337386	P51812	Ribosomal protein S6 kinase alpha-3 OS=Homo sapiens OX=9606 GN=RPS6KA3 PE=1 SV=1	RPS6KA3	83.735	1.2	1	1	1	1	0
Biological Process	GO:0023051	3	regulation of signaling	1.29	0.000337386	P52907	F-actin-capping protein subunit alpha-1 OS=Homo sapiens OX=9606 GN=CAPZA1 PE=1 SV=3	CAPZA1	32.922	0	0	0	0	0	0
Biological Process	GO:0023051	3	regulation of signaling	1.29	0.000337386	P53634	Dipeptidyl peptidase 1 OS=Homo sapiens OX=9606 GN=CTSC PE=1 SV=2	CTSC	51.853	0	0	0	0	0	0
Biological Process	GO:0023051	3	regulation of signaling	1.29	0.000337386	P55072	Transitional endoplasmic reticulum ATPase OS=Homo sapiens OX=9606 GN=VCP PE=1 SV=4	VCP	89.321	0	0	0	0	0	0
Biological Process	GO:0023051	3	regulation of signaling	1.29	0.000337386	P61981	14-3-3 protein gamma OS=Homo sapiens OX=9606 GN=YWHAG PE=1 SV=2	YWHAG	28.302	0	0	0	0	0	0
Biological Process	GO:0023051	3	regulation of signaling	1.29	0.000337386	P62081	40S ribosomal protein S7 OS=Homo sapiens OX=9606 GN=RPS7 PE=1 SV=1	RPS7	22.127	0	0	0	0	0	0
Biological Process	GO:0023051	3	regulation of signaling	1.29	0.000337386	P63104	14-3-3 protein zeta/delta OS=Homo sapiens OX=9606 GN=YWHAZ PE=1 SV=1	YWHAZ	27.745	0	0	0	0	0	0
Biological Process	GO:0009895	5	negative regulation of catabolic process	2.16	0.000362476	P00739	Haptoglobin-related protein OS=Homo sapiens OX=9606 GN=HPR PE=2 SV=2	HPR	39.029	34.2	5	14	3	3	169590000
Biological Process	GO:0009895	5	negative regulation of catabolic process	2.16	0.000362476	P02652	Apolipoprotein A-II OS=Homo sapiens OX=9606 GN=APOA2 PE=1 SV=1	APOA2	11.175	19	7	3	3	3	7512000000
Biological Process	GO:0009895	5	negative regulation of catabolic process	2.16	0.000362476	P02654	Apolipoprotein C-I OS=Homo sapiens OX=9606 GN=APOC1 PE=1 SV=1	APOC1	9.3318	34.9	3	3	3	3	164400000
Biological Process	GO:0033189	5	response to vitamin A	6.14	0.000386279	P04040	Catalase OS=Homo sapiens OX=9606 GN=CAT PE=1 SV=3	CAT	59.755	8.7	2	2	2	2	7648000
Biological Process	GO:0033189	5	response to vitamin A	6.14	0.000386279	P05089	Arginase-1 OS=Homo sapiens OX=9606 GN=ARG1 PE=1 SV=2	ARG1	34.735	8.4	5	3	3	3	32997000
Biological Process	GO:0033189	5	response to vitamin A	6.14	0.000386279	P05543	Thyroxine-binding globulin OS=Homo sapiens OX=9606 GN=SERPINA7 PE=1 SV=2	SERPINA7	46.324	13.7	13	6	6	6	768030000
Biological Process	GO:0033189	5	response to vitamin A	6.14	0.000386279	P16070	CD44 antigen OS=Homo sapiens OX=9606 GN=CD44 PE=1 SV=3	CD44	81.537	3	2	2	2	2	118550000
Biological Process	GO:0007159	4	leukocyte cell-cell adhesion	4.5	0.000388578	P05109	Protein S100-A8 OS=Homo sapiens OX=9606 GN=S100A8 PE=1 SV=1	S100A8	10.834	0	0	0	0	0	0
Biological Process	GO:0007159	4	leukocyte cell-cell adhesion	4.5	0.000388578	P05362	Intercellular adhesion molecule 1 OS=Homo sapiens OX=9606 GN=ICAM1 PE=1 SV=2	ICAM1	57.825	0	0	0	0	0	0
Biological Process	GO:0007159	4	leukocyte cell-cell adhesion	4.5	0.000388578	P05556	Integrin beta-1 OS=Homo sapiens OX=9606 GN=ITGB1 PE=1 SV=2	ITGB1	88.414	0	0	0	0	0	0
Biological Process	GO:0007159	4	leukocyte cell-cell adhesion	4.5	0.000388578	P06702	Protein S100-A9 OS=Homo sapiens OX=9606 GN=S100A9 PE=1 SV=1	S100A9	13.242	43	4	3	3	3	31021000
Biological Process	GO:0007159	4	leukocyte cell-cell adhesion	4.5	0.000388578	P07911	Uromodulin OS=Homo sapiens OX=9606 GN=UMOD PE=1 SV=1	UMOD	69.76	0	0	0	0	0	0
Biological Process	GO:0007159	4	leukocyte cell-cell adhesion	4.5	0.000388578	P14151	L-selectin OS=Homo sapiens OX=9606 GN=SELL PE=1 SV=2	SELL	42.187	3	1	1	1	1	59859000
Biological Process	GO:0007159	4	leukocyte cell-cell adhesion	4.5	0.000388578	P16070	CD44 antigen OS=Homo sapiens OX=9606 GN=CD44 PE=1 SV=3	CD44	81.537	3	2	2	2	2	118550000
Biological Process	GO:0007159	4	leukocyte cell-cell adhesion	4.5	0.000388578	P13598	Intercellular adhesion molecule 2 OS=Homo sapiens OX=9606 GN=ICAM2 PE=1 SV=2	ICAM2	30.654	0	0	0	0	0	0
Biological Process	GO:0043065	7	positive regulation of apoptotic process	1.78	0.000393224	O15195	Villin-like protein OS=Homo sapiens OX=9606 GN=VILL PE=1 SV=3	VILL	95.906	3.4	2	2	2	2	17286000
Biological Process	GO:0043065	7	positive regulation of apoptotic process	1.78	0.000393224	O75460	Serine/threonine-protein kinase/endoribonuclease IRE1 OS=Homo sapiens OX=9606 GN=ERN1 PE=1 SV=2	ERN1	109.73	0.9	2	1	1	1	118360000
Biological Process	GO:0043065	7	positive regulation of apoptotic process	1.78	0.000393224	P00338	L-lactate dehydrogenase A chain OS=Homo sapiens OX=9606 GN=LDHA PE=1 SV=2	LDHA	36.688	0	0	0	0	0	0
Biological Process	GO:0043065	7	positive regulation of apoptotic process	1.78	0.000393224	P00441	Superoxide dismutase [Cu-Zn] OS=Homo sapiens OX=9606 GN=SOD1 PE=1 SV=2	SOD1	15.936	0	0	0	0	0	0
Biological Process	GO:0043065	7	positive regulation of apoptotic process	1.78	0.000393224	P01019	Angiotensinogen OS=Homo sapiens OX=9606 GN=AGT PE=1 SV=3	AGT	53.154	7.6	3	3	3	3	91548000
Biological Process	GO:0043065	7	positive regulation of apoptotic process	1.78	0.000393224	P01042	Kininogen-1 OS=Homo sapiens OX=9606 GN=KNG1 PE=1 SV=2	KNG1	71.957	16.8	10	9	9	9	1803300000
Biological Process	GO:0043065	7	positive regulation of apoptotic process	1.78	0.000393224	P04083	Annexin A1 OS=Homo sapiens OX=9606 GN=ANXA1 PE=1 SV=2	ANXA1	38.714	0	0	0	0	0	0
Biological Process	GO:0043065	7	positive regulation of apoptotic process	1.78	0.000393224	P04406	Glyceraldehyde-3-phosphate dehydrogenase OS=Homo sapiens OX=9606 GN=GAPDH PE=1 SV=3	GAPDH	36.053	28.7	5	6	6	6	28325000
Biological Process	GO:0043065	7	positive regulation of apoptotic process	1.78	0.000393224	P05109	Protein S100-A8 OS=Homo sapiens OX=9606 GN=S100A8 PE=1 SV=1	S100A8	10.834	0	0	0	0	0	0
Biological Process	GO:0043065	7	positive regulation of apoptotic process	1.78	0.000393224	P05556	Integrin beta-1 OS=Homo sapiens OX=9606 GN=ITGB1 PE=1 SV=2	ITGB1	88.414	0	0	0	0	0	0
Biological Process	GO:0043065	7	positive regulation of apoptotic process	1.78	0.000393224	P06396	Gelsolin OS=Homo sapiens OX=9606 GN=GSN PE=1 SV=1	GSN	85.696	0	0	0	0	0	0
Biological Process	GO:0033189	5	response to vitamin A	6.14	0.000386279	P02753	Retinol-binding protein 4 OS=Homo sapiens OX=9606 GN=RBP4 PE=1 SV=3	RBP4	23.01	47.3	7	7	7	7	728740000
Biological Process	GO:0043065	7	positive regulation of apoptotic process	1.78	0.000393224	P06702	Protein S100-A9 OS=Homo sapiens OX=9606 GN=S100A9 PE=1 SV=1	S100A9	13.242	43	4	3	3	3	31021000
Biological Process	GO:0033189	5	response to vitamin A	6.14	0.000386279	P02656	Apolipoprotein C-III OS=Homo sapiens OX=9606 GN=APOC3 PE=1 SV=1	APOC3	10.852	0	0	0	0	0	0
Biological Process	GO:0031581	7	hemidesmosome assembly	6.14	0.000386279	P48668	Keratin, type II cytoskeletal 6C OS=Homo sapiens OX=9606 GN=KRT6C PE=1 SV=3	KRT6C	60.024	42.4	16	25	0	11	157050000
Biological Process	GO:0042325	7	regulation of phosphorylation	1.48	0.000383974	Q02763	Angiopoietin-1 receptor OS=Homo sapiens OX=9606 GN=TEK PE=1 SV=2	TEK	125.83	0	0	0	0	0	0
Biological Process	GO:0042325	7	regulation of phosphorylation	1.48	0.000383974	P00746	Complement factor D OS=Homo sapiens OX=9606 GN=CFD PE=1 SV=5	CFD	27.033	0	0	0	0	0	0
Biological Process	GO:0042325	7	regulation of phosphorylation	1.48	0.000383974	P0C0L4	Complement C4-A OS=Homo sapiens OX=9606 GN=C4A PE=1 SV=2	C4A	192.78	0	0	0	0	0	0
Biological Process	GO:0042325	7	regulation of phosphorylation	1.48	0.000383974	P19022	Cadherin-2 OS=Homo sapiens OX=9606 GN=CDH2 PE=1 SV=4	CDH2	99.808	0	0	0	0	0	0
Biological Process	GO:0042325	7	regulation of phosphorylation	1.48	0.000383974	Q01101	Insulinoma-associated protein 1 OS=Homo sapiens OX=9606 GN=INSM1 PE=1 SV=1	INSM1	52.923	0	0	0	0	0	0
Biological Process	GO:0042325	7	regulation of phosphorylation	1.48	0.000383974	Q6IQ55	Tau-tubulin kinase 2 OS=Homo sapiens OX=9606 GN=TTBK2 PE=1 SV=2	TTBK2	137.41	1.1	1	1	1	1	0
Biological Process	GO:0042325	7	regulation of phosphorylation	1.48	0.000383974	Q96KB5	Lymphokine-activated killer T-cell-originated protein kinase OS=Homo sapiens OX=9606 GN=PBK PE=1 SV=3	PBK	36.085	0	0	0	0	0	0
Biological Process	GO:0042325	7	regulation of phosphorylation	1.48	0.000383974	Q9H4G4	Golgi-associated plant pathogenesis-related protein 1 OS=Homo sapiens OX=9606 GN=GLIPR2 PE=1 SV=3	GLIPR2	17.218	0	0	0	0	0	0
Biological Process	GO:0042325	7	regulation of phosphorylation	1.48	0.000383974	Q99996	A-kinase anchor protein 9 OS=Homo sapiens OX=9606 GN=AKAP9 PE=1 SV=4	AKAP9	452.98	0	0	0	0	0	0
Biological Process	GO:0042325	7	regulation of phosphorylation	1.48	0.000383974	Q8N1I0	Dedicator of cytokinesis protein 4 OS=Homo sapiens OX=9606 GN=DOCK4 PE=1 SV=3	DOCK4	225.2	0.5	1	1	1	1	0
Biological Process	GO:0055072	9	iron ion homeostasis	4.04	0.000386252	P00441	Superoxide dismutase [Cu-Zn] OS=Homo sapiens OX=9606 GN=SOD1 PE=1 SV=2	SOD1	15.936	0	0	0	0	0	0
Biological Process	GO:0055072	9	iron ion homeostasis	4.04	0.000386252	P00450	Ceruloplasmin OS=Homo sapiens OX=9606 GN=CP PE=1 SV=1	CP	122.2	22.9	25	17	17	17	892180000
Biological Process	GO:0055072	9	iron ion homeostasis	4.04	0.000386252	P02787	Serotransferrin OS=Homo sapiens OX=9606 GN=TF PE=1 SV=4	TF	77.049	60.5	160	43	43	43	50131000000
Biological Process	GO:0055072	9	iron ion homeostasis	4.04	0.000386252	P02788	Lactotransferrin OS=Homo sapiens OX=9606 GN=LTF PE=1 SV=6	LTF	78.181	16.3	11	9	9	9	133970000
Biological Process	GO:0055072	9	iron ion homeostasis	4.04	0.000386252	P02790	Hemopexin OS=Homo sapiens OX=9606 GN=HPX PE=1 SV=2	HPX	51.676	63	99	20	20	20	81563000000
Biological Process	GO:0055072	9	iron ion homeostasis	4.04	0.000386252	P09601	Heme oxygenase 1 OS=Homo sapiens OX=9606 GN=HMOX1 PE=1 SV=1	HMOX1	32.818	0	0	0	0	0	0
Biological Process	GO:0055072	9	iron ion homeostasis	4.04	0.000386252	P28676	Grancalcin OS=Homo sapiens OX=9606 GN=GCA PE=1 SV=2	GCA	24.01	0	0	0	0	0	0
Biological Process	GO:0055072	9	iron ion homeostasis	4.04	0.000386252	P80188	Neutrophil gelatinase-associated lipocalin OS=Homo sapiens OX=9606 GN=LCN2 PE=1 SV=2	LCN2	22.588	0	0	0	0	0	0
Biological Process	GO:0055072	9	iron ion homeostasis	4.04	0.000386252	P61769	Beta-2-microglobulin OS=Homo sapiens OX=9606 GN=B2M PE=1 SV=1	B2M	13.714	8.4	1	1	1	1	13665000
Biological Process	GO:0031581	7	hemidesmosome assembly	6.14	0.000386279	P02533	Keratin, type I cytoskeletal 14 OS=Homo sapiens OX=9606 GN=KRT14 PE=1 SV=4	KRT14	51.561	43	23	18	6	14	387220000
Biological Process	GO:0031581	7	hemidesmosome assembly	6.14	0.000386279	P02538	Keratin, type II cytoskeletal 6A OS=Homo sapiens OX=9606 GN=KRT6A PE=1 SV=3	KRT6A	60.044	42.4	3	24	2	2	61562000
Biological Process	GO:0031581	7	hemidesmosome assembly	6.14	0.000386279	P04259	Keratin, type II cytoskeletal 6B OS=Homo sapiens OX=9606 GN=KRT6B PE=1 SV=5	KRT6B	60.066	36.3	3	23	2	2	10185000
Biological Process	GO:0031581	7	hemidesmosome assembly	6.14	0.000386279	P13647	Keratin, type II cytoskeletal 5 OS=Homo sapiens OX=9606 GN=KRT5 PE=1 SV=3	KRT5	62.378	41.4	43	29	16	22	662780000
Biological Process	GO:0031581	7	hemidesmosome assembly	6.14	0.000386279	Q15149	Plectin OS=Homo sapiens OX=9606 GN=PLEC PE=1 SV=3	PLEC	531.78	0	0	0	0	0	0
Biological Process	GO:0042325	7	regulation of phosphorylation	1.48	0.000383974	P13598	Intercellular adhesion molecule 2 OS=Homo sapiens OX=9606 GN=ICAM2 PE=1 SV=2	ICAM2	30.654	0	0	0	0	0	0
Biological Process	GO:0043065	7	positive regulation of apoptotic process	1.78	0.000393224	P09619	Platelet-derived growth factor receptor beta OS=Homo sapiens OX=9606 GN=PDGFRB PE=1 SV=1	PDGFRB	123.97	2.9	3	2	2	2	4182400
Biological Process	GO:0043065	7	positive regulation of apoptotic process	1.78	0.000393224	P10809	60 kDa heat shock protein, mitochondrial OS=Homo sapiens OX=9606 GN=HSPD1 PE=1 SV=2	HSPD1	61.054	0	0	0	0	0	0
Biological Process	GO:1903036	5	positive regulation of response to wounding	3.19	0.000400573	P02749	Beta-2-glycoprotein 1 OS=Homo sapiens OX=9606 GN=APOH PE=1 SV=3	APOH	38.298	30.4	26	10	10	10	5331200000
Biological Process	GO:1903036	5	positive regulation of response to wounding	3.19	0.000400573	P04083	Annexin A1 OS=Homo sapiens OX=9606 GN=ANXA1 PE=1 SV=2	ANXA1	38.714	0	0	0	0	0	0
Biological Process	GO:1903036	5	positive regulation of response to wounding	3.19	0.000400573	P06702	Protein S100-A9 OS=Homo sapiens OX=9606 GN=S100A9 PE=1 SV=1	S100A9	13.242	43	4	3	3	3	31021000
Biological Process	GO:1903036	5	positive regulation of response to wounding	3.19	0.000400573	P07384	Calpain-1 catalytic subunit OS=Homo sapiens OX=9606 GN=CAPN1 PE=1 SV=1	CAPN1	81.889	0	0	0	0	0	0
Biological Process	GO:1903036	5	positive regulation of response to wounding	3.19	0.000400573	P08697	Alpha-2-antiplasmin OS=Homo sapiens OX=9606 GN=SERPINF2 PE=1 SV=3	SERPINF2	54.565	17.9	7	6	6	6	283750000
Biological Process	GO:1903036	5	positive regulation of response to wounding	3.19	0.000400573	P14174	Macrophage migration inhibitory factor OS=Homo sapiens OX=9606 GN=MIF PE=1 SV=4	MIF	12.476	0	0	0	0	0	0
Biological Process	GO:1903036	5	positive regulation of response to wounding	3.19	0.000400573	P32119	Peroxiredoxin-2 OS=Homo sapiens OX=9606 GN=PRDX2 PE=1 SV=5	PRDX2	21.892	0	0	0	0	0	0
Biological Process	GO:1903036	5	positive regulation of response to wounding	3.19	0.000400573	Q04756	Hepatocyte growth factor activator OS=Homo sapiens OX=9606 GN=HGFAC PE=1 SV=1	HGFAC	70.681	4.7	2	2	2	2	11616000
Biological Process	GO:1903036	5	positive regulation of response to wounding	3.19	0.000400573	Q12913	Receptor-type tyrosine-protein phosphatase eta OS=Homo sapiens OX=9606 GN=PTPRJ PE=1 SV=3	PTPRJ	145.94	2.7	3	3	3	3	26199000
Biological Process	GO:1903036	5	positive regulation of response to wounding	3.19	0.000400573	Q96IY4	Carboxypeptidase B2 OS=Homo sapiens OX=9606 GN=CPB2 PE=1 SV=2	CPB2	48.424	16.3	2	3	3	3	43281000
Biological Process	GO:0051341	4	regulation of oxidoreductase activity	3.4	0.000402999	O75608	Acyl-protein thioesterase 1 OS=Homo sapiens OX=9606 GN=LYPLA1 PE=1 SV=1	LYPLA1	24.669	0	0	0	0	0	0
Biological Process	GO:0051341	4	regulation of oxidoreductase activity	3.4	0.000402999	P00533	Epidermal growth factor receptor OS=Homo sapiens OX=9606 GN=EGFR PE=1 SV=2	EGFR	134.28	0	0	0	0	0	0
Biological Process	GO:0051341	4	regulation of oxidoreductase activity	3.4	0.000402999	P00738	Haptoglobin OS=Homo sapiens OX=9606 GN=HP PE=1 SV=1	HP	45.205	53.7	182	24	13	24	96502000000
Biological Process	GO:0051341	4	regulation of oxidoreductase activity	3.4	0.000402999	P00739	Haptoglobin-related protein OS=Homo sapiens OX=9606 GN=HPR PE=2 SV=2	HPR	39.029	34.2	5	14	3	3	169590000
Biological Process	GO:0051341	4	regulation of oxidoreductase activity	3.4	0.000402999	P01019	Angiotensinogen OS=Homo sapiens OX=9606 GN=AGT PE=1 SV=3	AGT	53.154	7.6	3	3	3	3	91548000
Biological Process	GO:0051341	4	regulation of oxidoreductase activity	3.4	0.000402999	P08238	Heat shock protein HSP 90-beta OS=Homo sapiens OX=9606 GN=HSP90AB1 PE=1 SV=4	HSP90AB1	83.263	0	0	0	0	0	0
Biological Process	GO:0051341	4	regulation of oxidoreductase activity	3.4	0.000402999	P09211	Glutathione S-transferase P OS=Homo sapiens OX=9606 GN=GSTP1 PE=1 SV=2	GSTP1	23.356	0	0	0	0	0	0
Biological Process	GO:0051341	4	regulation of oxidoreductase activity	3.4	0.000402999	P12830	Cadherin-1 OS=Homo sapiens OX=9606 GN=CDH1 PE=1 SV=3	CDH1	97.455	1.8	2	2	2	2	7974000
Biological Process	GO:0051341	4	regulation of oxidoreductase activity	3.4	0.000402999	P17813	Endoglin OS=Homo sapiens OX=9606 GN=ENG PE=1 SV=2	ENG	70.577	0	0	0	0	0	0
Biological Process	GO:0051341	4	regulation of oxidoreductase activity	3.4	0.000402999	Q05193	Dynamin-1 OS=Homo sapiens OX=9606 GN=DNM1 PE=1 SV=2	DNM1	97.407	0	0	0	0	0	0
Biological Process	GO:0051341	4	regulation of oxidoreductase activity	3.4	0.000402999	Q16853	Membrane primary amine oxidase OS=Homo sapiens OX=9606 GN=AOC3 PE=1 SV=3	AOC3	84.621	6.3	3	3	3	3	29657000
Biological Process	GO:0051851	4	modulation by host of symbiont process	3.66	0.000410095	P02787	Serotransferrin OS=Homo sapiens OX=9606 GN=TF PE=1 SV=4	TF	77.049	60.5	160	43	43	43	50131000000
Biological Process	GO:0051851	4	modulation by host of symbiont process	3.66	0.000410095	P02788	Lactotransferrin OS=Homo sapiens OX=9606 GN=LTF PE=1 SV=6	LTF	78.181	16.3	11	9	9	9	133970000
Biological Process	GO:1903036	5	positive regulation of response to wounding	3.19	0.000400573	P00748	Coagulation factor XII OS=Homo sapiens OX=9606 GN=F12 PE=1 SV=3	F12	67.791	2.9	1	1	1	1	1355400
Biological Process	GO:0043065	7	positive regulation of apoptotic process	1.78	0.000393224	P62987	Ubiquitin-60S ribosomal protein L40 OS=Homo sapiens OX=9606 GN=UBA52 PE=1 SV=2	UBA52	14.728	39.1	7	6	6	6	90657000
Biological Process	GO:1903036	5	positive regulation of response to wounding	3.19	0.000400573	P00533	Epidermal growth factor receptor OS=Homo sapiens OX=9606 GN=EGFR PE=1 SV=2	EGFR	134.28	0	0	0	0	0	0
Biological Process	GO:0043065	7	positive regulation of apoptotic process	1.78	0.000393224	P98174	FYVE, RhoGEF and PH domain-containing protein 1 OS=Homo sapiens OX=9606 GN=FGD1 PE=1 SV=2	FGD1	106.56	0	0	0	0	0	0
Biological Process	GO:0043065	7	positive regulation of apoptotic process	1.78	0.000393224	P11388	DNA topoisomerase 2-alpha OS=Homo sapiens OX=9606 GN=TOP2A PE=1 SV=3	TOP2A	174.38	0	0	0	0	0	0
Biological Process	GO:0043065	7	positive regulation of apoptotic process	1.78	0.000393224	P15291	Beta-1,4-galactosyltransferase 1 OS=Homo sapiens OX=9606 GN=B4GALT1 PE=1 SV=5	B4GALT1	43.92	0	0	0	0	0	0
Biological Process	GO:0043065	7	positive regulation of apoptotic process	1.78	0.000393224	P16070	CD44 antigen OS=Homo sapiens OX=9606 GN=CD44 PE=1 SV=3	CD44	81.537	3	2	2	2	2	118550000
Biological Process	GO:0043065	7	positive regulation of apoptotic process	1.78	0.000393224	P16885	1-phosphatidylinositol 4,5-bisphosphate phosphodiesterase gamma-2 OS=Homo sapiens OX=9606 GN=PLCG2 PE=1 SV=4	PLCG2	147.87	0	0	0	0	0	0
Biological Process	GO:0043065	7	positive regulation of apoptotic process	1.78	0.000393224	P27487	Dipeptidyl peptidase 4 OS=Homo sapiens OX=9606 GN=DPP4 PE=1 SV=2	DPP4	88.278	15	7	8	8	8	79452000
Biological Process	GO:0043065	7	positive regulation of apoptotic process	1.78	0.000393224	P30101	Protein disulfide-isomerase A3 OS=Homo sapiens OX=9606 GN=PDIA3 PE=1 SV=4	PDIA3	56.782	0	0	0	0	0	0
Biological Process	GO:0043065	7	positive regulation of apoptotic process	1.78	0.000393224	P31947	14-3-3 protein sigma OS=Homo sapiens OX=9606 GN=SFN PE=1 SV=1	SFN	27.774	0	0	0	0	0	0
Biological Process	GO:0043065	7	positive regulation of apoptotic process	1.78	0.000393224	P42224	Signal transducer and activator of transcription 1-alpha/beta OS=Homo sapiens OX=9606 GN=STAT1 PE=1 SV=2	STAT1	87.334	0	0	0	0	0	0
Biological Process	GO:0043065	7	positive regulation of apoptotic process	1.78	0.000393224	P49662	Caspase-4 OS=Homo sapiens OX=9606 GN=CASP4 PE=1 SV=1	CASP4	43.262	4	6	1	1	1	29842000
Biological Process	GO:0043065	7	positive regulation of apoptotic process	1.78	0.000393224	Q05193	Dynamin-1 OS=Homo sapiens OX=9606 GN=DNM1 PE=1 SV=2	DNM1	97.407	0	0	0	0	0	0
Biological Process	GO:0043065	7	positive regulation of apoptotic process	1.78	0.000393224	P53634	Dipeptidyl peptidase 1 OS=Homo sapiens OX=9606 GN=CTSC PE=1 SV=2	CTSC	51.853	0	0	0	0	0	0
Biological Process	GO:0043065	7	positive regulation of apoptotic process	1.78	0.000393224	P55072	Transitional endoplasmic reticulum ATPase OS=Homo sapiens OX=9606 GN=VCP PE=1 SV=4	VCP	89.321	0	0	0	0	0	0
Biological Process	GO:0043065	7	positive regulation of apoptotic process	1.78	0.000393224	P61981	14-3-3 protein gamma OS=Homo sapiens OX=9606 GN=YWHAG PE=1 SV=2	YWHAG	28.302	0	0	0	0	0	0
Biological Process	GO:0043065	7	positive regulation of apoptotic process	1.78	0.000393224	P62081	40S ribosomal protein S7 OS=Homo sapiens OX=9606 GN=RPS7 PE=1 SV=1	RPS7	22.127	0	0	0	0	0	0
Biological Process	GO:0043065	7	positive regulation of apoptotic process	1.78	0.000393224	P62258	14-3-3 protein epsilon OS=Homo sapiens OX=9606 GN=YWHAE PE=1 SV=1	YWHAE	29.174	0	0	0	0	0	0
Biological Process	GO:0043065	7	positive regulation of apoptotic process	1.78	0.000393224	P63104	14-3-3 protein zeta/delta OS=Homo sapiens OX=9606 GN=YWHAZ PE=1 SV=1	YWHAZ	27.745	0	0	0	0	0	0
Biological Process	GO:0043065	7	positive regulation of apoptotic process	1.78	0.000393224	P63244	Receptor of activated protein C kinase 1 OS=Homo sapiens OX=9606 GN=RACK1 PE=1 SV=3	RACK1	35.076	0	0	0	0	0	0
Biological Process	GO:0043065	7	positive regulation of apoptotic process	1.78	0.000393224	P80108	Phosphatidylinositol-glycan-specific phospholipase D OS=Homo sapiens OX=9606 GN=GPLD1 PE=1 SV=3	GPLD1	92.335	7.7	5	5	5	5	109680000
Biological Process	GO:0043065	7	positive regulation of apoptotic process	1.78	0.000393224	Q15149	Plectin OS=Homo sapiens OX=9606 GN=PLEC PE=1 SV=3	PLEC	531.78	0	0	0	0	0	0
Biological Process	GO:0043065	7	positive regulation of apoptotic process	1.78	0.000393224	Q9Y261	Hepatocyte nuclear factor 3-beta OS=Homo sapiens OX=9606 GN=FOXA2 PE=1 SV=1	FOXA2	48.306	0	0	0	0	0	0
Biological Process	GO:0043065	7	positive regulation of apoptotic process	1.78	0.000393224	Q9Y3M8	StAR-related lipid transfer protein 13 OS=Homo sapiens OX=9606 GN=STARD13 PE=1 SV=2	STARD13	124.97	0	0	0	0	0	0
Biological Process	GO:0043065	7	positive regulation of apoptotic process	1.78	0.000393224	O75340	Programmed cell death protein 6 OS=Homo sapiens OX=9606 GN=PDCD6 PE=1 SV=1	PDCD6	21.868	0	0	0	0	0	0
Biological Process	GO:0043065	7	positive regulation of apoptotic process	1.78	0.000393224	Q9BZF9	Uveal autoantigen with coiled-coil domains and ankyrin repeats OS=Homo sapiens OX=9606 GN=UACA PE=1 SV=2	UACA	162.5	0	0	0	0	0	0
Biological Process	GO:0043065	7	positive regulation of apoptotic process	1.78	0.000393224	Q96QA5	Gasdermin-A OS=Homo sapiens OX=9606 GN=GSDMA PE=1 SV=4	GSDMA	49.364	0	0	0	0	0	0
Biological Process	GO:0042325	7	regulation of phosphorylation	1.48	0.000383974	O75553	Disabled homolog 1 OS=Homo sapiens OX=9606 GN=DAB1 PE=1 SV=3	DAB1	63.774	0	0	0	0	0	0
Biological Process	GO:0042325	7	regulation of phosphorylation	1.48	0.000383974	O75340	Programmed cell death protein 6 OS=Homo sapiens OX=9606 GN=PDCD6 PE=1 SV=1	PDCD6	21.868	0	0	0	0	0	0
Biological Process	GO:0042325	7	regulation of phosphorylation	1.48	0.000383974	Q9Y261	Hepatocyte nuclear factor 3-beta OS=Homo sapiens OX=9606 GN=FOXA2 PE=1 SV=1	FOXA2	48.306	0	0	0	0	0	0
Biological Process	GO:0016485	5	protein processing	2.66	0.000377215	P53634	Dipeptidyl peptidase 1 OS=Homo sapiens OX=9606 GN=CTSC PE=1 SV=2	CTSC	51.853	0	0	0	0	0	0
Biological Process	GO:0016485	5	protein processing	2.66	0.000377215	Q04756	Hepatocyte growth factor activator OS=Homo sapiens OX=9606 GN=HGFAC PE=1 SV=1	HGFAC	70.681	4.7	2	2	2	2	11616000
Biological Process	GO:0016485	5	protein processing	2.66	0.000377215	Q53RT3	Retroviral-like aspartic protease 1 OS=Homo sapiens OX=9606 GN=ASPRV1 PE=1 SV=1	ASPRV1	36.991	0	0	0	0	0	0
Biological Process	GO:0016485	5	protein processing	2.66	0.000377215	Q92876	Kallikrein-6 OS=Homo sapiens OX=9606 GN=KLK6 PE=1 SV=1	KLK6	26.855	0	0	0	0	0	0
Biological Process	GO:0016485	5	protein processing	2.66	0.000377215	Q96IY4	Carboxypeptidase B2 OS=Homo sapiens OX=9606 GN=CPB2 PE=1 SV=2	CPB2	48.424	16.3	2	3	3	3	43281000
Biological Process	GO:0016485	5	protein processing	2.66	0.000377215	Q9UI42	Carboxypeptidase A4 OS=Homo sapiens OX=9606 GN=CPA4 PE=1 SV=2	CPA4	47.351	0	0	0	0	0	0
Biological Process	GO:0016485	5	protein processing	2.66	0.000377215	Q9UIQ6	Leucyl-cystinyl aminopeptidase OS=Homo sapiens OX=9606 GN=LNPEP PE=1 SV=3	LNPEP	117.35	0	0	0	0	0	0
Biological Process	GO:0016485	5	protein processing	2.66	0.000377215	Q07075	Glutamyl aminopeptidase OS=Homo sapiens OX=9606 GN=ENPEP PE=1 SV=3	ENPEP	109.24	0	0	0	0	0	0
Biological Process	GO:0017001	3	antibiotic catabolic process	5.17	0.000377803	P02042	Hemoglobin subunit delta OS=Homo sapiens OX=9606 GN=HBD PE=1 SV=2	HBD	16.055	41.5	2	6	1	1	26357000
Biological Process	GO:0017001	3	antibiotic catabolic process	5.17	0.000377803	P04040	Catalase OS=Homo sapiens OX=9606 GN=CAT PE=1 SV=3	CAT	59.755	8.7	2	2	2	2	7648000
Biological Process	GO:0017001	3	antibiotic catabolic process	5.17	0.000377803	P05164	Myeloperoxidase OS=Homo sapiens OX=9606 GN=MPO PE=1 SV=1	MPO	83.868	2.7	1	1	1	1	1665100
Biological Process	GO:0017001	3	antibiotic catabolic process	5.17	0.000377803	P32119	Peroxiredoxin-2 OS=Homo sapiens OX=9606 GN=PRDX2 PE=1 SV=5	PRDX2	21.892	0	0	0	0	0	0
Biological Process	GO:0017001	3	antibiotic catabolic process	5.17	0.000377803	P68871	Hemoglobin subunit beta OS=Homo sapiens OX=9606 GN=HBB PE=1 SV=2	HBB	15.998	71.4	22	9	4	9	3143200000
Biological Process	GO:0017001	3	antibiotic catabolic process	5.17	0.000377803	P69905	Hemoglobin subunit alpha OS=Homo sapiens OX=9606 GN=HBA2 PE=1 SV=2	HBA2	15.257	57.7	20	6	6	6	1898500000
Biological Process	GO:0017001	3	antibiotic catabolic process	5.17	0.000377803	Q06830	Peroxiredoxin-1 OS=Homo sapiens OX=9606 GN=PRDX1 PE=1 SV=1	PRDX1	22.11	9	1	1	1	1	1860400
Biological Process	GO:0042325	7	regulation of phosphorylation	1.48	0.000383974	O43432	Eukaryotic translation initiation factor 4 gamma 3 OS=Homo sapiens OX=9606 GN=EIF4G3 PE=1 SV=2	EIF4G3	176.65	0.8	2	1	1	1	686540000
Biological Process	GO:0042325	7	regulation of phosphorylation	1.48	0.000383974	O75460	Serine/threonine-protein kinase/endoribonuclease IRE1 OS=Homo sapiens OX=9606 GN=ERN1 PE=1 SV=2	ERN1	109.73	0.9	2	1	1	1	118360000
Biological Process	GO:0042325	7	regulation of phosphorylation	1.48	0.000383974	P00441	Superoxide dismutase [Cu-Zn] OS=Homo sapiens OX=9606 GN=SOD1 PE=1 SV=2	SOD1	15.936	0	0	0	0	0	0
Biological Process	GO:0042325	7	regulation of phosphorylation	1.48	0.000383974	P00533	Epidermal growth factor receptor OS=Homo sapiens OX=9606 GN=EGFR PE=1 SV=2	EGFR	134.28	0	0	0	0	0	0
Biological Process	GO:0042325	7	regulation of phosphorylation	1.48	0.000383974	P01019	Angiotensinogen OS=Homo sapiens OX=9606 GN=AGT PE=1 SV=3	AGT	53.154	7.6	3	3	3	3	91548000
Biological Process	GO:0042325	7	regulation of phosphorylation	1.48	0.000383974	P01024	Complement C3 OS=Homo sapiens OX=9606 GN=C3 PE=1 SV=2	C3	187.15	0	0	0	0	0	0
Biological Process	GO:0042325	7	regulation of phosphorylation	1.48	0.000383974	P01042	Kininogen-1 OS=Homo sapiens OX=9606 GN=KNG1 PE=1 SV=2	KNG1	71.957	16.8	10	9	9	9	1803300000
Biological Process	GO:0042325	7	regulation of phosphorylation	1.48	0.000383974	P02042	Hemoglobin subunit delta OS=Homo sapiens OX=9606 GN=HBD PE=1 SV=2	HBD	16.055	41.5	2	6	1	1	26357000
Biological Process	GO:0016485	5	protein processing	2.66	0.000377215	P49662	Caspase-4 OS=Homo sapiens OX=9606 GN=CASP4 PE=1 SV=1	CASP4	43.262	4	6	1	1	1	29842000
Biological Process	GO:0042325	7	regulation of phosphorylation	1.48	0.000383974	P02647	Apolipoprotein A-I OS=Homo sapiens OX=9606 GN=APOA1 PE=1 SV=1	APOA1	30.777	20.6	5	5	5	5	76295000
Biological Process	GO:0016485	5	protein processing	2.66	0.000377215	P31930	Cytochrome b-c1 complex subunit 1, mitochondrial OS=Homo sapiens OX=9606 GN=UQCRC1 PE=1 SV=3	UQCRC1	52.645	0	0	0	0	0	0
Biological Process	GO:0016485	5	protein processing	2.66	0.000377215	P07384	Calpain-1 catalytic subunit OS=Homo sapiens OX=9606 GN=CAPN1 PE=1 SV=1	CAPN1	81.889	0	0	0	0	0	0
Biological Process	GO:0009895	5	negative regulation of catabolic process	2.16	0.000362476	P02656	Apolipoprotein C-III OS=Homo sapiens OX=9606 GN=APOC3 PE=1 SV=1	APOC3	10.852	0	0	0	0	0	0
Biological Process	GO:0009895	5	negative regulation of catabolic process	2.16	0.000362476	P07108	Acyl-CoA-binding protein OS=Homo sapiens OX=9606 GN=DBI PE=1 SV=2	DBI	10.044	0	0	0	0	0	0
Biological Process	GO:0009895	5	negative regulation of catabolic process	2.16	0.000362476	P07355	Annexin A2 OS=Homo sapiens OX=9606 GN=ANXA2 PE=1 SV=2	ANXA2	38.604	15.3	4	4	4	4	8350100
Biological Process	GO:0009895	5	negative regulation of catabolic process	2.16	0.000362476	P08238	Heat shock protein HSP 90-beta OS=Homo sapiens OX=9606 GN=HSP90AB1 PE=1 SV=4	HSP90AB1	83.263	0	0	0	0	0	0
Biological Process	GO:0009895	5	negative regulation of catabolic process	2.16	0.000362476	P19784	Casein kinase II subunit alpha' OS=Homo sapiens OX=9606 GN=CSNK2A2 PE=1 SV=1	CSNK2A2	41.213	0	0	0	0	0	0
Biological Process	GO:0009895	5	negative regulation of catabolic process	2.16	0.000362476	P21333	Filamin-A OS=Homo sapiens OX=9606 GN=FLNA PE=1 SV=4	FLNA	280.74	0	0	0	0	0	0
Biological Process	GO:0009895	5	negative regulation of catabolic process	2.16	0.000362476	P29508	Serpin B3 OS=Homo sapiens OX=9606 GN=SERPINB3 PE=1 SV=2	SERPINB3	44.564	0	0	0	0	0	0
Biological Process	GO:0009895	5	negative regulation of catabolic process	2.16	0.000362476	P30740	Leukocyte elastase inhibitor OS=Homo sapiens OX=9606 GN=SERPINB1 PE=1 SV=1	SERPINB1	42.741	0	0	0	0	0	0
Biological Process	GO:0009895	5	negative regulation of catabolic process	2.16	0.000362476	P35232	Prohibitin 1 OS=Homo sapiens OX=9606 GN=PHB1 PE=1 SV=1	PHB1	29.804	0	0	0	0	0	0
Biological Process	GO:0009895	5	negative regulation of catabolic process	2.16	0.000362476	P62081	40S ribosomal protein S7 OS=Homo sapiens OX=9606 GN=RPS7 PE=1 SV=1	RPS7	22.127	0	0	0	0	0	0
Biological Process	GO:0009895	5	negative regulation of catabolic process	2.16	0.000362476	P80108	Phosphatidylinositol-glycan-specific phospholipase D OS=Homo sapiens OX=9606 GN=GPLD1 PE=1 SV=3	GPLD1	92.335	7.7	5	5	5	5	109680000
Biological Process	GO:0009895	5	negative regulation of catabolic process	2.16	0.000362476	Q13835	Plakophilin-1 OS=Homo sapiens OX=9606 GN=PKP1 PE=1 SV=2	PKP1	82.86	0	0	0	0	0	0
Biological Process	GO:0009895	5	negative regulation of catabolic process	2.16	0.000362476	Q8N9W4	Golgin subfamily A member 6-like protein 2 OS=Homo sapiens OX=9606 GN=GOLGA6L2 PE=1 SV=3	GOLGA6L2	100.61	0	0	0	0	0	0
Biological Process	GO:0009895	5	negative regulation of catabolic process	2.16	0.000362476	Q96P63	Serpin B12 OS=Homo sapiens OX=9606 GN=SERPINB12 PE=1 SV=1	SERPINB12	46.276	3	1	1	1	1	3836800
Biological Process	GO:0009895	5	negative regulation of catabolic process	2.16	0.000362476	Q9UIV8	Serpin B13 OS=Homo sapiens OX=9606 GN=SERPINB13 PE=1 SV=2	SERPINB13	44.276	0	0	0	0	0	0
Biological Process	GO:0009895	5	negative regulation of catabolic process	2.16	0.000362476	P01033	Metalloproteinase inhibitor 1 OS=Homo sapiens OX=9606 GN=TIMP1 PE=1 SV=1	TIMP1	23.171	12.1	1	2	2	2	17139000
Biological Process	GO:0009895	5	negative regulation of catabolic process	2.16	0.000362476	P01034	Cystatin-C OS=Homo sapiens OX=9606 GN=CST3 PE=1 SV=1	CST3	15.799	23.3	3	3	3	3	14030000
Biological Process	GO:0009895	5	negative regulation of catabolic process	2.16	0.000362476	Q8TEC5	E3 ubiquitin-protein ligase SH3RF2 OS=Homo sapiens OX=9606 GN=SH3RF2 PE=1 SV=3	SH3RF2	79.319	0	0	0	0	0	0
Biological Process	GO:0009895	5	negative regulation of catabolic process	2.16	0.000362476	Q96KB5	Lymphokine-activated killer T-cell-originated protein kinase OS=Homo sapiens OX=9606 GN=PBK PE=1 SV=3	PBK	36.085	0	0	0	0	0	0
Biological Process	GO:0016485	5	protein processing	2.66	0.000377215	P00558	Phosphoglycerate kinase 1 OS=Homo sapiens OX=9606 GN=PGK1 PE=1 SV=3	PGK1	44.614	0	0	0	0	0	0
Biological Process	GO:0016485	5	protein processing	2.66	0.000377215	P00748	Coagulation factor XII OS=Homo sapiens OX=9606 GN=F12 PE=1 SV=3	F12	67.791	2.9	1	1	1	1	1355400
Biological Process	GO:0016485	5	protein processing	2.66	0.000377215	P02749	Beta-2-glycoprotein 1 OS=Homo sapiens OX=9606 GN=APOH PE=1 SV=3	APOH	38.298	30.4	26	10	10	10	5331200000
Biological Process	GO:0016485	5	protein processing	2.66	0.000377215	P03952	Plasma kallikrein OS=Homo sapiens OX=9606 GN=KLKB1 PE=1 SV=1	KLKB1	71.369	3.6	2	2	2	2	42984000
Biological Process	GO:0016485	5	protein processing	2.66	0.000377215	P15169	Carboxypeptidase N catalytic chain OS=Homo sapiens OX=9606 GN=CPN1 PE=1 SV=1	CPN1	52.286	0	0	0	0	0	0
Biological Process	GO:0042325	7	regulation of phosphorylation	1.48	0.000383974	P02656	Apolipoprotein C-III OS=Homo sapiens OX=9606 GN=APOC3 PE=1 SV=1	APOC3	10.852	0	0	0	0	0	0
Biological Process	GO:0042325	7	regulation of phosphorylation	1.48	0.000383974	P02760	Protein AMBP OS=Homo sapiens OX=9606 GN=AMBP PE=1 SV=1	AMBP	38.999	31	10	8	8	8	794190000
Biological Process	GO:0042325	7	regulation of phosphorylation	1.48	0.000383974	P02765	Alpha-2-HS-glycoprotein OS=Homo sapiens OX=9606 GN=AHSG PE=1 SV=2	AHSG	39.34	23.2	41	7	7	7	4512000000
Biological Process	GO:0042325	7	regulation of phosphorylation	1.48	0.000383974	P35232	Prohibitin 1 OS=Homo sapiens OX=9606 GN=PHB1 PE=1 SV=1	PHB1	29.804	0	0	0	0	0	0
Biological Process	GO:0042325	7	regulation of phosphorylation	1.48	0.000383974	P35579	Myosin-9 OS=Homo sapiens OX=9606 GN=MYH9 PE=1 SV=4	MYH9	226.53	1.8	2	2	2	2	2939500
Biological Process	GO:0042325	7	regulation of phosphorylation	1.48	0.000383974	P46939	Utrophin OS=Homo sapiens OX=9606 GN=UTRN PE=1 SV=2	UTRN	394.46	0.5	1	1	1	1	0
Biological Process	GO:0042325	7	regulation of phosphorylation	1.48	0.000383974	P47756	F-actin-capping protein subunit beta OS=Homo sapiens OX=9606 GN=CAPZB PE=1 SV=5	CAPZB	30.628	0	0	0	0	0	0
Biological Process	GO:0042325	7	regulation of phosphorylation	1.48	0.000383974	Q05193	Dynamin-1 OS=Homo sapiens OX=9606 GN=DNM1 PE=1 SV=2	DNM1	97.407	0	0	0	0	0	0
Biological Process	GO:0042325	7	regulation of phosphorylation	1.48	0.000383974	P52907	F-actin-capping protein subunit alpha-1 OS=Homo sapiens OX=9606 GN=CAPZA1 PE=1 SV=3	CAPZA1	32.922	0	0	0	0	0	0
Biological Process	GO:0042325	7	regulation of phosphorylation	1.48	0.000383974	P55072	Transitional endoplasmic reticulum ATPase OS=Homo sapiens OX=9606 GN=VCP PE=1 SV=4	VCP	89.321	0	0	0	0	0	0
Biological Process	GO:0042325	7	regulation of phosphorylation	1.48	0.000383974	P63261	Actin, cytoplasmic 2 OS=Homo sapiens OX=9606 GN=ACTG1 PE=1 SV=1	ACTG1	41.792	9.3	1	3	3	3	4758900
Biological Process	GO:0042325	7	regulation of phosphorylation	1.48	0.000383974	P61981	14-3-3 protein gamma OS=Homo sapiens OX=9606 GN=YWHAG PE=1 SV=2	YWHAG	28.302	0	0	0	0	0	0
Biological Process	GO:0042325	7	regulation of phosphorylation	1.48	0.000383974	P62258	14-3-3 protein epsilon OS=Homo sapiens OX=9606 GN=YWHAE PE=1 SV=1	YWHAE	29.174	0	0	0	0	0	0
Biological Process	GO:0042325	7	regulation of phosphorylation	1.48	0.000383974	P63244	Receptor of activated protein C kinase 1 OS=Homo sapiens OX=9606 GN=RACK1 PE=1 SV=3	RACK1	35.076	0	0	0	0	0	0
Biological Process	GO:0042325	7	regulation of phosphorylation	1.48	0.000383974	P68871	Hemoglobin subunit beta OS=Homo sapiens OX=9606 GN=HBB PE=1 SV=2	HBB	15.998	71.4	22	9	4	9	3143200000
Biological Process	GO:0042325	7	regulation of phosphorylation	1.48	0.000383974	P80511	Protein S100-A12 OS=Homo sapiens OX=9606 GN=S100A12 PE=1 SV=2	S100A12	10.575	0	0	0	0	0	0
Biological Process	GO:0042325	7	regulation of phosphorylation	1.48	0.000383974	Q06830	Peroxiredoxin-1 OS=Homo sapiens OX=9606 GN=PRDX1 PE=1 SV=1	PRDX1	22.11	9	1	1	1	1	1860400
Biological Process	GO:0042325	7	regulation of phosphorylation	1.48	0.000383974	Q10588	ADP-ribosyl cyclase/cyclic ADP-ribose hydrolase 2 OS=Homo sapiens OX=9606 GN=BST1 PE=1 SV=2	BST1	35.724	7.9	2	2	2	2	26770000
Biological Process	GO:0042325	7	regulation of phosphorylation	1.48	0.000383974	Q12913	Receptor-type tyrosine-protein phosphatase eta OS=Homo sapiens OX=9606 GN=PTPRJ PE=1 SV=3	PTPRJ	145.94	2.7	3	3	3	3	26199000
Biological Process	GO:0042325	7	regulation of phosphorylation	1.48	0.000383974	Q14764	Major vault protein OS=Homo sapiens OX=9606 GN=MVP PE=1 SV=4	MVP	99.326	0	0	0	0	0	0
Biological Process	GO:0042325	7	regulation of phosphorylation	1.48	0.000383974	Q86SG5	Protein S100-A7A OS=Homo sapiens OX=9606 GN=S100A7A PE=1 SV=3	S100A7A	11.305	0	0	0	0	0	0
Biological Process	GO:0042325	7	regulation of phosphorylation	1.48	0.000383974	Q8TDY2	RB1-inducible coiled-coil protein 1 OS=Homo sapiens OX=9606 GN=RB1CC1 PE=1 SV=3	RB1CC1	183.09	0	0	0	0	0	0
Biological Process	GO:0042325	7	regulation of phosphorylation	1.48	0.000383974	Q969H8	Myeloid-derived growth factor OS=Homo sapiens OX=9606 GN=MYDGF PE=1 SV=1	MYDGF	18.795	0	0	0	0	0	0
Biological Process	GO:0042325	7	regulation of phosphorylation	1.48	0.000383974	Q96P63	Serpin B12 OS=Homo sapiens OX=9606 GN=SERPINB12 PE=1 SV=1	SERPINB12	46.276	3	1	1	1	1	3836800
Biological Process	GO:0042325	7	regulation of phosphorylation	1.48	0.000383974	Q9UHA4	Ragulator complex protein LAMTOR3 OS=Homo sapiens OX=9606 GN=LAMTOR3 PE=1 SV=1	LAMTOR3	13.623	0	0	0	0	0	0
Biological Process	GO:0042325	7	regulation of phosphorylation	1.48	0.000383974	Q9UIV8	Serpin B13 OS=Homo sapiens OX=9606 GN=SERPINB13 PE=1 SV=2	SERPINB13	44.276	0	0	0	0	0	0
Biological Process	GO:0042325	7	regulation of phosphorylation	1.48	0.000383974	P32119	Peroxiredoxin-2 OS=Homo sapiens OX=9606 GN=PRDX2 PE=1 SV=5	PRDX2	21.892	0	0	0	0	0	0
Biological Process	GO:0042325	7	regulation of phosphorylation	1.48	0.000383974	P31947	14-3-3 protein sigma OS=Homo sapiens OX=9606 GN=SFN PE=1 SV=1	SFN	27.774	0	0	0	0	0	0
Biological Process	GO:0042325	7	regulation of phosphorylation	1.48	0.000383974	P31151	Protein S100-A7 OS=Homo sapiens OX=9606 GN=S100A7 PE=1 SV=4	S100A7	11.471	14.9	5	3	3	3	18159000
Biological Process	GO:0042325	7	regulation of phosphorylation	1.48	0.000383974	P30740	Leukocyte elastase inhibitor OS=Homo sapiens OX=9606 GN=SERPINB1 PE=1 SV=1	SERPINB1	42.741	0	0	0	0	0	0
Biological Process	GO:0042325	7	regulation of phosphorylation	1.48	0.000383974	P02787	Serotransferrin OS=Homo sapiens OX=9606 GN=TF PE=1 SV=4	TF	77.049	60.5	160	43	43	43	50131000000
Biological Process	GO:0042325	7	regulation of phosphorylation	1.48	0.000383974	P02788	Lactotransferrin OS=Homo sapiens OX=9606 GN=LTF PE=1 SV=6	LTF	78.181	16.3	11	9	9	9	133970000
Biological Process	GO:0042325	7	regulation of phosphorylation	1.48	0.000383974	P02790	Hemopexin OS=Homo sapiens OX=9606 GN=HPX PE=1 SV=2	HPX	51.676	63	99	20	20	20	81563000000
Biological Process	GO:0042325	7	regulation of phosphorylation	1.48	0.000383974	P04792	Heat shock protein beta-1 OS=Homo sapiens OX=9606 GN=HSPB1 PE=1 SV=2	HSPB1	22.782	7.8	1	1	1	1	1730200
Biological Process	GO:0042325	7	regulation of phosphorylation	1.48	0.000383974	P05362	Intercellular adhesion molecule 1 OS=Homo sapiens OX=9606 GN=ICAM1 PE=1 SV=2	ICAM1	57.825	0	0	0	0	0	0
Biological Process	GO:0042325	7	regulation of phosphorylation	1.48	0.000383974	P05556	Integrin beta-1 OS=Homo sapiens OX=9606 GN=ITGB1 PE=1 SV=2	ITGB1	88.414	0	0	0	0	0	0
Biological Process	GO:0042325	7	regulation of phosphorylation	1.48	0.000383974	P07333	Macrophage colony-stimulating factor 1 receptor OS=Homo sapiens OX=9606 GN=CSF1R PE=1 SV=2	CSF1R	107.98	2.2	2	2	2	2	24589000
Biological Process	GO:0042325	7	regulation of phosphorylation	1.48	0.000383974	P07355	Annexin A2 OS=Homo sapiens OX=9606 GN=ANXA2 PE=1 SV=2	ANXA2	38.604	15.3	4	4	4	4	8350100
Biological Process	GO:0042325	7	regulation of phosphorylation	1.48	0.000383974	P07359	Platelet glycoprotein Ib alpha chain OS=Homo sapiens OX=9606 GN=GP1BA PE=1 SV=2	GP1BA	71.539	0	0	0	0	0	0
Biological Process	GO:0042325	7	regulation of phosphorylation	1.48	0.000383974	P08238	Heat shock protein HSP 90-beta OS=Homo sapiens OX=9606 GN=HSP90AB1 PE=1 SV=4	HSP90AB1	83.263	0	0	0	0	0	0
Biological Process	GO:0042325	7	regulation of phosphorylation	1.48	0.000383974	P08697	Alpha-2-antiplasmin OS=Homo sapiens OX=9606 GN=SERPINF2 PE=1 SV=3	SERPINF2	54.565	17.9	7	6	6	6	283750000
Biological Process	GO:0023051	3	regulation of signaling	1.29	0.000337386	P02753	Retinol-binding protein 4 OS=Homo sapiens OX=9606 GN=RBP4 PE=1 SV=3	RBP4	23.01	47.3	7	7	7	7	728740000
Biological Process	GO:0042325	7	regulation of phosphorylation	1.48	0.000383974	P09211	Glutathione S-transferase P OS=Homo sapiens OX=9606 GN=GSTP1 PE=1 SV=2	GSTP1	23.356	0	0	0	0	0	0
Biological Process	GO:0042325	7	regulation of phosphorylation	1.48	0.000383974	P0C0L5	Complement C4-B OS=Homo sapiens OX=9606 GN=C4B_2 PE=1 SV=2	C4B_2	192.75	2.9	4	3	3	3	50961000
Biological Process	GO:0042325	7	regulation of phosphorylation	1.48	0.000383974	P62987	Ubiquitin-60S ribosomal protein L40 OS=Homo sapiens OX=9606 GN=UBA52 PE=1 SV=2	UBA52	14.728	39.1	7	6	6	6	90657000
Biological Process	GO:0042325	7	regulation of phosphorylation	1.48	0.000383974	P10599	Thioredoxin OS=Homo sapiens OX=9606 GN=TXN PE=1 SV=3	TXN	11.737	0	0	0	0	0	0
Biological Process	GO:0042325	7	regulation of phosphorylation	1.48	0.000383974	P14174	Macrophage migration inhibitory factor OS=Homo sapiens OX=9606 GN=MIF PE=1 SV=4	MIF	12.476	0	0	0	0	0	0
Biological Process	GO:0042325	7	regulation of phosphorylation	1.48	0.000383974	P14635	G2/mitotic-specific cyclin-B1 OS=Homo sapiens OX=9606 GN=CCNB1 PE=1 SV=1	CCNB1	48.337	0	0	0	0	0	0
Biological Process	GO:0042325	7	regulation of phosphorylation	1.48	0.000383974	P15309	Prostatic acid phosphatase OS=Homo sapiens OX=9606 GN=ACP3 PE=1 SV=3	ACP3	44.566	0	0	0	0	0	0
Biological Process	GO:0042325	7	regulation of phosphorylation	1.48	0.000383974	P16070	CD44 antigen OS=Homo sapiens OX=9606 GN=CD44 PE=1 SV=3	CD44	81.537	3	2	2	2	2	118550000
Biological Process	GO:0042325	7	regulation of phosphorylation	1.48	0.000383974	P17813	Endoglin OS=Homo sapiens OX=9606 GN=ENG PE=1 SV=2	ENG	70.577	0	0	0	0	0	0
Biological Process	GO:0042325	7	regulation of phosphorylation	1.48	0.000383974	P18510	Interleukin-1 receptor antagonist protein OS=Homo sapiens OX=9606 GN=IL1RN PE=1 SV=1	IL1RN	20.055	0	0	0	0	0	0
Biological Process	GO:0042325	7	regulation of phosphorylation	1.48	0.000383974	P29508	Serpin B3 OS=Homo sapiens OX=9606 GN=SERPINB3 PE=1 SV=2	SERPINB3	44.564	0	0	0	0	0	0
Biological Process	GO:0042325	7	regulation of phosphorylation	1.48	0.000383974	P30086	Phosphatidylethanolamine-binding protein 1 OS=Homo sapiens OX=9606 GN=PEBP1 PE=1 SV=3	PEBP1	21.057	0	0	0	0	0	0
Biological Process	GO:0042325	7	regulation of phosphorylation	1.48	0.000383974	P09619	Platelet-derived growth factor receptor beta OS=Homo sapiens OX=9606 GN=PDGFRB PE=1 SV=1	PDGFRB	123.97	2.9	3	2	2	2	4182400
Biological Process	GO:0023051	3	regulation of signaling	1.29	0.000337386	P02656	Apolipoprotein C-III OS=Homo sapiens OX=9606 GN=APOC3 PE=1 SV=1	APOC3	10.852	0	0	0	0	0	0
Biological Process	GO:0023051	3	regulation of signaling	1.29	0.000337386	P02647	Apolipoprotein A-I OS=Homo sapiens OX=9606 GN=APOA1 PE=1 SV=1	APOA1	30.777	20.6	5	5	5	5	76295000
Biological Process	GO:0023051	3	regulation of signaling	1.29	0.000337386	P02545	Prelamin-A/C OS=Homo sapiens OX=9606 GN=LMNA PE=1 SV=1	LMNA	74.139	0	0	0	0	0	0
Biological Process	GO:0009141	5	nucleoside triphosphate metabolic process	2.53	0.000307916	P25705	ATP synthase subunit alpha, mitochondrial OS=Homo sapiens OX=9606 GN=ATP5F1A PE=1 SV=1	ATP5F1A	59.75	0	0	0	0	0	0
Biological Process	GO:0009141	5	nucleoside triphosphate metabolic process	2.53	0.000307916	P31930	Cytochrome b-c1 complex subunit 1, mitochondrial OS=Homo sapiens OX=9606 GN=UQCRC1 PE=1 SV=3	UQCRC1	52.645	0	0	0	0	0	0
Biological Process	GO:0009141	5	nucleoside triphosphate metabolic process	2.53	0.000307916	P55072	Transitional endoplasmic reticulum ATPase OS=Homo sapiens OX=9606 GN=VCP PE=1 SV=4	VCP	89.321	0	0	0	0	0	0
Biological Process	GO:0009141	5	nucleoside triphosphate metabolic process	2.53	0.000307916	P60174	Triosephosphate isomerase OS=Homo sapiens OX=9606 GN=TPI1 PE=1 SV=4	TPI1	26.669	0	0	0	0	0	0
Biological Process	GO:0009141	5	nucleoside triphosphate metabolic process	2.53	0.000307916	P62826	GTP-binding nuclear protein Ran OS=Homo sapiens OX=9606 GN=RAN PE=1 SV=3	RAN	24.423	0	0	0	0	0	0
Biological Process	GO:0009141	5	nucleoside triphosphate metabolic process	2.53	0.000307916	Q8NCQ7	Protein PROCA1 OS=Homo sapiens OX=9606 GN=PROCA1 PE=1 SV=3	PROCA1	40.506	0	0	0	0	0	0
Biological Process	GO:0009141	5	nucleoside triphosphate metabolic process	2.53	0.000307916	O60282	Kinesin heavy chain isoform 5C OS=Homo sapiens OX=9606 GN=KIF5C PE=1 SV=1	KIF5C	109.49	0.8	9	1	1	1	2190000000
Biological Process	GO:0009141	5	nucleoside triphosphate metabolic process	2.53	0.000307916	P07738	Bisphosphoglycerate mutase OS=Homo sapiens OX=9606 GN=BPGM PE=1 SV=2	BPGM	30.005	0	0	0	0	0	0
Biological Process	GO:0050793	3	regulation of developmental process	1.33	0.00030891	O00204	Sulfotransferase 2B1 OS=Homo sapiens OX=9606 GN=SULT2B1 PE=1 SV=2	SULT2B1	41.307	0	0	0	0	0	0
Biological Process	GO:0050793	3	regulation of developmental process	1.33	0.00030891	O00327	Basic helix-loop-helix ARNT-like protein 1 OS=Homo sapiens OX=9606 GN=BMAL1 PE=1 SV=2	BMAL1	68.761	0	0	0	0	0	0
Biological Process	GO:0050793	3	regulation of developmental process	1.33	0.00030891	O15144	Actin-related protein 2/3 complex subunit 2 OS=Homo sapiens OX=9606 GN=ARPC2 PE=1 SV=1	ARPC2	34.333	0	0	0	0	0	0
Biological Process	GO:0050793	3	regulation of developmental process	1.33	0.00030891	O15195	Villin-like protein OS=Homo sapiens OX=9606 GN=VILL PE=1 SV=3	VILL	95.906	3.4	2	2	2	2	17286000
Biological Process	GO:0050793	3	regulation of developmental process	1.33	0.00030891	O43707	Alpha-actinin-4 OS=Homo sapiens OX=9606 GN=ACTN4 PE=1 SV=2	ACTN4	104.85	0	0	0	0	0	0
Biological Process	GO:0050793	3	regulation of developmental process	1.33	0.00030891	O75882	Attractin OS=Homo sapiens OX=9606 GN=ATRN PE=1 SV=2	ATRN	158.54	17.3	30	20	20	20	1296100000
Biological Process	GO:0050793	3	regulation of developmental process	1.33	0.00030891	P00441	Superoxide dismutase [Cu-Zn] OS=Homo sapiens OX=9606 GN=SOD1 PE=1 SV=2	SOD1	15.936	0	0	0	0	0	0
Biological Process	GO:0050793	3	regulation of developmental process	1.33	0.00030891	P00533	Epidermal growth factor receptor OS=Homo sapiens OX=9606 GN=EGFR PE=1 SV=2	EGFR	134.28	0	0	0	0	0	0
Biological Process	GO:0050793	3	regulation of developmental process	1.33	0.00030891	P00558	Phosphoglycerate kinase 1 OS=Homo sapiens OX=9606 GN=PGK1 PE=1 SV=3	PGK1	44.614	0	0	0	0	0	0
Biological Process	GO:0050793	3	regulation of developmental process	1.33	0.00030891	P00918	Carbonic anhydrase 2 OS=Homo sapiens OX=9606 GN=CA2 PE=1 SV=2	CA2	29.246	0	0	0	0	0	0
Biological Process	GO:0050793	3	regulation of developmental process	1.33	0.00030891	P01019	Angiotensinogen OS=Homo sapiens OX=9606 GN=AGT PE=1 SV=3	AGT	53.154	7.6	3	3	3	3	91548000
Biological Process	GO:0050793	3	regulation of developmental process	1.33	0.00030891	P01024	Complement C3 OS=Homo sapiens OX=9606 GN=C3 PE=1 SV=2	C3	187.15	0	0	0	0	0	0
Biological Process	GO:0050793	3	regulation of developmental process	1.33	0.00030891	P02545	Prelamin-A/C OS=Homo sapiens OX=9606 GN=LMNA PE=1 SV=1	LMNA	74.139	0	0	0	0	0	0
Biological Process	GO:0050793	3	regulation of developmental process	1.33	0.00030891	P02647	Apolipoprotein A-I OS=Homo sapiens OX=9606 GN=APOA1 PE=1 SV=1	APOA1	30.777	20.6	5	5	5	5	76295000
Biological Process	GO:0050793	3	regulation of developmental process	1.33	0.00030891	P02749	Beta-2-glycoprotein 1 OS=Homo sapiens OX=9606 GN=APOH PE=1 SV=3	APOH	38.298	30.4	26	10	10	10	5331200000
Biological Process	GO:0009141	5	nucleoside triphosphate metabolic process	2.53	0.000307916	P15259	Phosphoglycerate mutase 2 OS=Homo sapiens OX=9606 GN=PGAM2 PE=1 SV=3	PGAM2	28.766	0	0	0	0	0	0
Biological Process	GO:0050793	3	regulation of developmental process	1.33	0.00030891	P02753	Retinol-binding protein 4 OS=Homo sapiens OX=9606 GN=RBP4 PE=1 SV=3	RBP4	23.01	47.3	7	7	7	7	728740000
Biological Process	GO:0009141	5	nucleoside triphosphate metabolic process	2.53	0.000307916	P14618	Pyruvate kinase PKM OS=Homo sapiens OX=9606 GN=PKM PE=1 SV=4	PKM	57.936	0	0	0	0	0	0
Biological Process	GO:0009141	5	nucleoside triphosphate metabolic process	2.53	0.000307916	P0DMV9	Heat shock 70 kDa protein 1B OS=Homo sapiens OX=9606 GN=HSPA1B PE=1 SV=1	HSPA1B	70.051	0	0	0	0	0	0
Biological Process	GO:0043434	4	response to peptide hormone	2.01	0.000294202	Q9Y261	Hepatocyte nuclear factor 3-beta OS=Homo sapiens OX=9606 GN=FOXA2 PE=1 SV=1	FOXA2	48.306	0	0	0	0	0	0
Biological Process	GO:0043434	4	response to peptide hormone	2.01	0.000294202	P01033	Metalloproteinase inhibitor 1 OS=Homo sapiens OX=9606 GN=TIMP1 PE=1 SV=1	TIMP1	23.171	12.1	1	2	2	2	17139000
Biological Process	GO:0043434	4	response to peptide hormone	2.01	0.000294202	Q9UIQ6	Leucyl-cystinyl aminopeptidase OS=Homo sapiens OX=9606 GN=LNPEP PE=1 SV=3	LNPEP	117.35	0	0	0	0	0	0
Biological Process	GO:0042381	3	hemolymph coagulation	19.96	0.000295191	O75223	Gamma-glutamylcyclotransferase OS=Homo sapiens OX=9606 GN=GGCT PE=1 SV=1	GGCT	21.007	0	0	0	0	0	0
Biological Process	GO:0042381	3	hemolymph coagulation	19.96	0.000295191	P22735	Protein-glutamine gamma-glutamyltransferase K OS=Homo sapiens OX=9606 GN=TGM1 PE=1 SV=4	TGM1	89.786	3.3	2	2	2	2	11308000
Biological Process	GO:0042381	3	hemolymph coagulation	19.96	0.000295191	Q9HC84	Mucin-5B OS=Homo sapiens OX=9606 GN=MUC5B PE=1 SV=3	MUC5B	596.33	0	0	0	0	0	0
Biological Process	GO:0009124	6	nucleoside monophosphate biosynthetic process	3.51	0.000307061	P00338	L-lactate dehydrogenase A chain OS=Homo sapiens OX=9606 GN=LDHA PE=1 SV=2	LDHA	36.688	0	0	0	0	0	0
Biological Process	GO:0009124	6	nucleoside monophosphate biosynthetic process	3.51	0.000307061	P00558	Phosphoglycerate kinase 1 OS=Homo sapiens OX=9606 GN=PGK1 PE=1 SV=3	PGK1	44.614	0	0	0	0	0	0
Biological Process	GO:0009124	6	nucleoside monophosphate biosynthetic process	3.51	0.000307061	P04075	Fructose-bisphosphate aldolase A OS=Homo sapiens OX=9606 GN=ALDOA PE=1 SV=2	ALDOA	39.42	4.9	1	1	1	1	12992000
Biological Process	GO:0009124	6	nucleoside monophosphate biosynthetic process	3.51	0.000307061	P04406	Glyceraldehyde-3-phosphate dehydrogenase OS=Homo sapiens OX=9606 GN=GAPDH PE=1 SV=3	GAPDH	36.053	28.7	5	6	6	6	28325000
Biological Process	GO:0009124	6	nucleoside monophosphate biosynthetic process	3.51	0.000307061	P06576	ATP synthase subunit beta, mitochondrial OS=Homo sapiens OX=9606 GN=ATP5F1B PE=1 SV=3	ATP5F1B	56.559	0	0	0	0	0	0
Biological Process	GO:0009124	6	nucleoside monophosphate biosynthetic process	3.51	0.000307061	P06733	Alpha-enolase OS=Homo sapiens OX=9606 GN=ENO1 PE=1 SV=2	ENO1	47.168	4.4	1	1	1	1	3345600
Biological Process	GO:0009124	6	nucleoside monophosphate biosynthetic process	3.51	0.000307061	P14618	Pyruvate kinase PKM OS=Homo sapiens OX=9606 GN=PKM PE=1 SV=4	PKM	57.936	0	0	0	0	0	0
Biological Process	GO:0009124	6	nucleoside monophosphate biosynthetic process	3.51	0.000307061	P15259	Phosphoglycerate mutase 2 OS=Homo sapiens OX=9606 GN=PGAM2 PE=1 SV=3	PGAM2	28.766	0	0	0	0	0	0
Biological Process	GO:0009124	6	nucleoside monophosphate biosynthetic process	3.51	0.000307061	P25705	ATP synthase subunit alpha, mitochondrial OS=Homo sapiens OX=9606 GN=ATP5F1A PE=1 SV=1	ATP5F1A	59.75	0	0	0	0	0	0
Biological Process	GO:0009124	6	nucleoside monophosphate biosynthetic process	3.51	0.000307061	P60174	Triosephosphate isomerase OS=Homo sapiens OX=9606 GN=TPI1 PE=1 SV=4	TPI1	26.669	0	0	0	0	0	0
Biological Process	GO:0009124	6	nucleoside monophosphate biosynthetic process	3.51	0.000307061	P07738	Bisphosphoglycerate mutase OS=Homo sapiens OX=9606 GN=BPGM PE=1 SV=2	BPGM	30.005	0	0	0	0	0	0
Biological Process	GO:0009141	5	nucleoside triphosphate metabolic process	2.53	0.000307916	P00338	L-lactate dehydrogenase A chain OS=Homo sapiens OX=9606 GN=LDHA PE=1 SV=2	LDHA	36.688	0	0	0	0	0	0
Biological Process	GO:0009141	5	nucleoside triphosphate metabolic process	2.53	0.000307916	P00558	Phosphoglycerate kinase 1 OS=Homo sapiens OX=9606 GN=PGK1 PE=1 SV=3	PGK1	44.614	0	0	0	0	0	0
Biological Process	GO:0009141	5	nucleoside triphosphate metabolic process	2.53	0.000307916	P04075	Fructose-bisphosphate aldolase A OS=Homo sapiens OX=9606 GN=ALDOA PE=1 SV=2	ALDOA	39.42	4.9	1	1	1	1	12992000
Biological Process	GO:0009141	5	nucleoside triphosphate metabolic process	2.53	0.000307916	P04406	Glyceraldehyde-3-phosphate dehydrogenase OS=Homo sapiens OX=9606 GN=GAPDH PE=1 SV=3	GAPDH	36.053	28.7	5	6	6	6	28325000
Biological Process	GO:0009141	5	nucleoside triphosphate metabolic process	2.53	0.000307916	P06576	ATP synthase subunit beta, mitochondrial OS=Homo sapiens OX=9606 GN=ATP5F1B PE=1 SV=3	ATP5F1B	56.559	0	0	0	0	0	0
Biological Process	GO:0009141	5	nucleoside triphosphate metabolic process	2.53	0.000307916	P06733	Alpha-enolase OS=Homo sapiens OX=9606 GN=ENO1 PE=1 SV=2	ENO1	47.168	4.4	1	1	1	1	3345600
Biological Process	GO:0009141	5	nucleoside triphosphate metabolic process	2.53	0.000307916	P11142	Heat shock cognate 71 kDa protein OS=Homo sapiens OX=9606 GN=HSPA8 PE=1 SV=1	HSPA8	70.897	0	0	0	0	0	0
Biological Process	GO:0043434	4	response to peptide hormone	2.01	0.000294202	Q92820	Gamma-glutamyl hydrolase OS=Homo sapiens OX=9606 GN=GGH PE=1 SV=2	GGH	35.964	9.4	4	3	3	3	38423000
Biological Process	GO:0050793	3	regulation of developmental process	1.33	0.00030891	P02765	Alpha-2-HS-glycoprotein OS=Homo sapiens OX=9606 GN=AHSG PE=1 SV=2	AHSG	39.34	23.2	41	7	7	7	4512000000
Biological Process	GO:0050793	3	regulation of developmental process	1.33	0.00030891	P02788	Lactotransferrin OS=Homo sapiens OX=9606 GN=LTF PE=1 SV=6	LTF	78.181	16.3	11	9	9	9	133970000
Biological Process	GO:0050793	3	regulation of developmental process	1.33	0.00030891	P15291	Beta-1,4-galactosyltransferase 1 OS=Homo sapiens OX=9606 GN=B4GALT1 PE=1 SV=5	B4GALT1	43.92	0	0	0	0	0	0
Biological Process	GO:0050793	3	regulation of developmental process	1.33	0.00030891	P15309	Prostatic acid phosphatase OS=Homo sapiens OX=9606 GN=ACP3 PE=1 SV=3	ACP3	44.566	0	0	0	0	0	0
Biological Process	GO:0050793	3	regulation of developmental process	1.33	0.00030891	P16070	CD44 antigen OS=Homo sapiens OX=9606 GN=CD44 PE=1 SV=3	CD44	81.537	3	2	2	2	2	118550000
Biological Process	GO:0050793	3	regulation of developmental process	1.33	0.00030891	P16885	1-phosphatidylinositol 4,5-bisphosphate phosphodiesterase gamma-2 OS=Homo sapiens OX=9606 GN=PLCG2 PE=1 SV=4	PLCG2	147.87	0	0	0	0	0	0
Biological Process	GO:0050793	3	regulation of developmental process	1.33	0.00030891	P17813	Endoglin OS=Homo sapiens OX=9606 GN=ENG PE=1 SV=2	ENG	70.577	0	0	0	0	0	0
Biological Process	GO:0050793	3	regulation of developmental process	1.33	0.00030891	P17931	Galectin-3 OS=Homo sapiens OX=9606 GN=LGALS3 PE=1 SV=5	LGALS3	26.152	0	0	0	0	0	0
Biological Process	GO:0050793	3	regulation of developmental process	1.33	0.00030891	P18510	Interleukin-1 receptor antagonist protein OS=Homo sapiens OX=9606 GN=IL1RN PE=1 SV=1	IL1RN	20.055	0	0	0	0	0	0
Biological Process	GO:0050793	3	regulation of developmental process	1.33	0.00030891	P19012	Keratin, type I cytoskeletal 15 OS=Homo sapiens OX=9606 GN=KRT15 PE=1 SV=3	KRT15	49.211	0	0	0	0	0	0
Biological Process	GO:0050793	3	regulation of developmental process	1.33	0.00030891	P19971	Thymidine phosphorylase OS=Homo sapiens OX=9606 GN=TYMP PE=1 SV=2	TYMP	49.955	0	0	0	0	0	0
Biological Process	GO:0050793	3	regulation of developmental process	1.33	0.00030891	P20073	Annexin A7 OS=Homo sapiens OX=9606 GN=ANXA7 PE=1 SV=3	ANXA7	52.739	0	0	0	0	0	0
Biological Process	GO:0050793	3	regulation of developmental process	1.33	0.00030891	P21281	V-type proton ATPase subunit B, brain isoform OS=Homo sapiens OX=9606 GN=ATP6V1B2 PE=1 SV=3	ATP6V1B2	56.5	0	0	0	0	0	0
Biological Process	GO:0050793	3	regulation of developmental process	1.33	0.00030891	P21333	Filamin-A OS=Homo sapiens OX=9606 GN=FLNA PE=1 SV=4	FLNA	280.74	0	0	0	0	0	0
Biological Process	GO:0050793	3	regulation of developmental process	1.33	0.00030891	P23470	Receptor-type tyrosine-protein phosphatase gamma OS=Homo sapiens OX=9606 GN=PTPRG PE=1 SV=4	PTPRG	162	1	1	1	1	1	5890900
Biological Process	GO:0050793	3	regulation of developmental process	1.33	0.00030891	P25311	Zinc-alpha-2-glycoprotein OS=Homo sapiens OX=9606 GN=AZGP1 PE=1 SV=2	AZGP1	34.258	36.2	19	11	11	11	3450300000
Biological Process	GO:0050793	3	regulation of developmental process	1.33	0.00030891	P29508	Serpin B3 OS=Homo sapiens OX=9606 GN=SERPINB3 PE=1 SV=2	SERPINB3	44.564	0	0	0	0	0	0
Biological Process	GO:0050793	3	regulation of developmental process	1.33	0.00030891	P30101	Protein disulfide-isomerase A3 OS=Homo sapiens OX=9606 GN=PDIA3 PE=1 SV=4	PDIA3	56.782	0	0	0	0	0	0
Biological Process	GO:0050793	3	regulation of developmental process	1.33	0.00030891	P30530	Tyrosine-protein kinase receptor UFO OS=Homo sapiens OX=9606 GN=AXL PE=1 SV=4	AXL	98.336	0	0	0	0	0	0
Biological Process	GO:0050793	3	regulation of developmental process	1.33	0.00030891	P30740	Leukocyte elastase inhibitor OS=Homo sapiens OX=9606 GN=SERPINB1 PE=1 SV=1	SERPINB1	42.741	0	0	0	0	0	0
Biological Process	GO:0050793	3	regulation of developmental process	1.33	0.00030891	P31947	14-3-3 protein sigma OS=Homo sapiens OX=9606 GN=SFN PE=1 SV=1	SFN	27.774	0	0	0	0	0	0
Biological Process	GO:0050793	3	regulation of developmental process	1.33	0.00030891	P32119	Peroxiredoxin-2 OS=Homo sapiens OX=9606 GN=PRDX2 PE=1 SV=5	PRDX2	21.892	0	0	0	0	0	0
Biological Process	GO:0050793	3	regulation of developmental process	1.33	0.00030891	P35527	Keratin, type I cytoskeletal 9 OS=Homo sapiens OX=9606 GN=KRT9 PE=1 SV=3	KRT9	62.064	63.6	163	44	44	44	9025200000
Biological Process	GO:0050793	3	regulation of developmental process	1.33	0.00030891	P35579	Myosin-9 OS=Homo sapiens OX=9606 GN=MYH9 PE=1 SV=4	MYH9	226.53	1.8	2	2	2	2	2939500
Biological Process	GO:0050793	3	regulation of developmental process	1.33	0.00030891	P35908	Keratin, type II cytoskeletal 2 epidermal OS=Homo sapiens OX=9606 GN=KRT2 PE=1 SV=2	KRT2	65.432	76.8	101	48	35	44	4005200000
Biological Process	GO:0050793	3	regulation of developmental process	1.33	0.00030891	P14923	Junction plakoglobin OS=Homo sapiens OX=9606 GN=JUP PE=1 SV=3	JUP	81.744	7.2	3	3	3	3	11408000
Biological Process	GO:0050793	3	regulation of developmental process	1.33	0.00030891	P02787	Serotransferrin OS=Homo sapiens OX=9606 GN=TF PE=1 SV=4	TF	77.049	60.5	160	43	43	43	50131000000
Biological Process	GO:0050793	3	regulation of developmental process	1.33	0.00030891	P14735	Insulin-degrading enzyme OS=Homo sapiens OX=9606 GN=IDE PE=1 SV=4	IDE	117.97	0	0	0	0	0	0
Biological Process	GO:0050793	3	regulation of developmental process	1.33	0.00030891	P14174	Macrophage migration inhibitory factor OS=Homo sapiens OX=9606 GN=MIF PE=1 SV=4	MIF	12.476	0	0	0	0	0	0
Biological Process	GO:0050793	3	regulation of developmental process	1.33	0.00030891	P04040	Catalase OS=Homo sapiens OX=9606 GN=CAT PE=1 SV=3	CAT	59.755	8.7	2	2	2	2	7648000
Biological Process	GO:0050793	3	regulation of developmental process	1.33	0.00030891	P04075	Fructose-bisphosphate aldolase A OS=Homo sapiens OX=9606 GN=ALDOA PE=1 SV=2	ALDOA	39.42	4.9	1	1	1	1	12992000
Biological Process	GO:0050793	3	regulation of developmental process	1.33	0.00030891	P04083	Annexin A1 OS=Homo sapiens OX=9606 GN=ANXA1 PE=1 SV=2	ANXA1	38.714	0	0	0	0	0	0
Biological Process	GO:0050793	3	regulation of developmental process	1.33	0.00030891	P04264	Keratin, type II cytoskeletal 1 OS=Homo sapiens OX=9606 GN=KRT1 PE=1 SV=6	KRT1	66.038	73.1	166	58	52	58	20880000000
Biological Process	GO:0050793	3	regulation of developmental process	1.33	0.00030891	P04792	Heat shock protein beta-1 OS=Homo sapiens OX=9606 GN=HSPB1 PE=1 SV=2	HSPB1	22.782	7.8	1	1	1	1	1730200
Biological Process	GO:0050793	3	regulation of developmental process	1.33	0.00030891	P05362	Intercellular adhesion molecule 1 OS=Homo sapiens OX=9606 GN=ICAM1 PE=1 SV=2	ICAM1	57.825	0	0	0	0	0	0
Biological Process	GO:0050793	3	regulation of developmental process	1.33	0.00030891	P05556	Integrin beta-1 OS=Homo sapiens OX=9606 GN=ITGB1 PE=1 SV=2	ITGB1	88.414	0	0	0	0	0	0
Biological Process	GO:0050793	3	regulation of developmental process	1.33	0.00030891	P06396	Gelsolin OS=Homo sapiens OX=9606 GN=GSN PE=1 SV=1	GSN	85.696	0	0	0	0	0	0
Biological Process	GO:0050793	3	regulation of developmental process	1.33	0.00030891	P06702	Protein S100-A9 OS=Homo sapiens OX=9606 GN=S100A9 PE=1 SV=1	S100A9	13.242	43	4	3	3	3	31021000
Biological Process	GO:0050793	3	regulation of developmental process	1.33	0.00030891	P07333	Macrophage colony-stimulating factor 1 receptor OS=Homo sapiens OX=9606 GN=CSF1R PE=1 SV=2	CSF1R	107.98	2.2	2	2	2	2	24589000
Biological Process	GO:0050793	3	regulation of developmental process	1.33	0.00030891	P07355	Annexin A2 OS=Homo sapiens OX=9606 GN=ANXA2 PE=1 SV=2	ANXA2	38.604	15.3	4	4	4	4	8350100
Biological Process	GO:0050793	3	regulation of developmental process	1.33	0.00030891	P07359	Platelet glycoprotein Ib alpha chain OS=Homo sapiens OX=9606 GN=GP1BA PE=1 SV=2	GP1BA	71.539	0	0	0	0	0	0
Biological Process	GO:0050793	3	regulation of developmental process	1.33	0.00030891	P07384	Calpain-1 catalytic subunit OS=Homo sapiens OX=9606 GN=CAPN1 PE=1 SV=1	CAPN1	81.889	0	0	0	0	0	0
Biological Process	GO:0050793	3	regulation of developmental process	1.33	0.00030891	P08238	Heat shock protein HSP 90-beta OS=Homo sapiens OX=9606 GN=HSP90AB1 PE=1 SV=4	HSP90AB1	83.263	0	0	0	0	0	0
Biological Process	GO:0050793	3	regulation of developmental process	1.33	0.00030891	P08670	Vimentin OS=Homo sapiens OX=9606 GN=VIM PE=1 SV=4	VIM	53.651	0	0	0	0	0	0
Biological Process	GO:0050793	3	regulation of developmental process	1.33	0.00030891	P08697	Alpha-2-antiplasmin OS=Homo sapiens OX=9606 GN=SERPINF2 PE=1 SV=3	SERPINF2	54.565	17.9	7	6	6	6	283750000
Biological Process	GO:0050793	3	regulation of developmental process	1.33	0.00030891	P08779	Keratin, type I cytoskeletal 16 OS=Homo sapiens OX=9606 GN=KRT16 PE=1 SV=4	KRT16	51.267	33	9	16	7	7	65846000
Biological Process	GO:0050793	3	regulation of developmental process	1.33	0.00030891	P09601	Heme oxygenase 1 OS=Homo sapiens OX=9606 GN=HMOX1 PE=1 SV=1	HMOX1	32.818	0	0	0	0	0	0
Biological Process	GO:0050793	3	regulation of developmental process	1.33	0.00030891	P09619	Platelet-derived growth factor receptor beta OS=Homo sapiens OX=9606 GN=PDGFRB PE=1 SV=1	PDGFRB	123.97	2.9	3	2	2	2	4182400
Biological Process	GO:0050793	3	regulation of developmental process	1.33	0.00030891	P0DMV9	Heat shock 70 kDa protein 1B OS=Homo sapiens OX=9606 GN=HSPA1B PE=1 SV=1	HSPA1B	70.051	0	0	0	0	0	0
Biological Process	GO:0050793	3	regulation of developmental process	1.33	0.00030891	P11021	Endoplasmic reticulum chaperone BiP OS=Homo sapiens OX=9606 GN=HSPA5 PE=1 SV=2	HSPA5	72.332	0	0	0	0	0	0
Biological Process	GO:0050793	3	regulation of developmental process	1.33	0.00030891	P12830	Cadherin-1 OS=Homo sapiens OX=9606 GN=CDH1 PE=1 SV=3	CDH1	97.455	1.8	2	2	2	2	7974000
Biological Process	GO:0050793	3	regulation of developmental process	1.33	0.00030891	P13645	Keratin, type I cytoskeletal 10 OS=Homo sapiens OX=9606 GN=KRT10 PE=1 SV=6	KRT10	58.826	45.7	108	38	34	38	5389000000
Biological Process	GO:0050793	3	regulation of developmental process	1.33	0.00030891	P14635	G2/mitotic-specific cyclin-B1 OS=Homo sapiens OX=9606 GN=CCNB1 PE=1 SV=1	CCNB1	48.337	0	0	0	0	0	0
Biological Process	GO:0043434	4	response to peptide hormone	2.01	0.000294202	P80108	Phosphatidylinositol-glycan-specific phospholipase D OS=Homo sapiens OX=9606 GN=GPLD1 PE=1 SV=3	GPLD1	92.335	7.7	5	5	5	5	109680000
Biological Process	GO:0043434	4	response to peptide hormone	2.01	0.000294202	P61981	14-3-3 protein gamma OS=Homo sapiens OX=9606 GN=YWHAG PE=1 SV=2	YWHAG	28.302	0	0	0	0	0	0
Biological Process	GO:0043434	4	response to peptide hormone	2.01	0.000294202	P42224	Signal transducer and activator of transcription 1-alpha/beta OS=Homo sapiens OX=9606 GN=STAT1 PE=1 SV=2	STAT1	87.334	0	0	0	0	0	0
Biological Process	GO:0022404	2	molting cycle process	3.35	0.000258098	P14174	Macrophage migration inhibitory factor OS=Homo sapiens OX=9606 GN=MIF PE=1 SV=4	MIF	12.476	0	0	0	0	0	0
Biological Process	GO:0022404	2	molting cycle process	3.35	0.000258098	P19012	Keratin, type I cytoskeletal 15 OS=Homo sapiens OX=9606 GN=KRT15 PE=1 SV=3	KRT15	49.211	0	0	0	0	0	0
Biological Process	GO:0022404	2	molting cycle process	3.35	0.000258098	P35527	Keratin, type I cytoskeletal 9 OS=Homo sapiens OX=9606 GN=KRT9 PE=1 SV=3	KRT9	62.064	63.6	163	44	44	44	9025200000
Biological Process	GO:0022404	2	molting cycle process	3.35	0.000258098	P35908	Keratin, type II cytoskeletal 2 epidermal OS=Homo sapiens OX=9606 GN=KRT2 PE=1 SV=2	KRT2	65.432	76.8	101	48	35	44	4005200000
Biological Process	GO:0022404	2	molting cycle process	3.35	0.000258098	Q04695	Keratin, type I cytoskeletal 17 OS=Homo sapiens OX=9606 GN=KRT17 PE=1 SV=2	KRT17	48.105	32.6	5	10	5	5	28013000
Biological Process	GO:0022404	2	molting cycle process	3.35	0.000258098	Q08188	Protein-glutamine gamma-glutamyltransferase E OS=Homo sapiens OX=9606 GN=TGM3 PE=1 SV=4	TGM3	76.631	0	0	0	0	0	0
Biological Process	GO:0022404	2	molting cycle process	3.35	0.000258098	Q96QA5	Gasdermin-A OS=Homo sapiens OX=9606 GN=GSDMA PE=1 SV=4	GSDMA	49.364	0	0	0	0	0	0
Biological Process	GO:0022404	2	molting cycle process	3.35	0.000258098	P13646	Keratin, type I cytoskeletal 13 OS=Homo sapiens OX=9606 GN=KRT13 PE=1 SV=4	KRT13	49.588	6.6	1	2	1	1	681050
Biological Process	GO:0048871	2	multicellular organismal homeostasis	2.1	0.000269926	P00441	Superoxide dismutase [Cu-Zn] OS=Homo sapiens OX=9606 GN=SOD1 PE=1 SV=2	SOD1	15.936	0	0	0	0	0	0
Biological Process	GO:0048871	2	multicellular organismal homeostasis	2.1	0.000269926	P00533	Epidermal growth factor receptor OS=Homo sapiens OX=9606 GN=EGFR PE=1 SV=2	EGFR	134.28	0	0	0	0	0	0
Biological Process	GO:0048871	2	multicellular organismal homeostasis	2.1	0.000269926	P01011	Alpha-1-antichymotrypsin OS=Homo sapiens OX=9606 GN=SERPINA3 PE=1 SV=2	SERPINA3	47.65	16.8	5	5	5	5	76232000
Biological Process	GO:0048871	2	multicellular organismal homeostasis	2.1	0.000269926	P02753	Retinol-binding protein 4 OS=Homo sapiens OX=9606 GN=RBP4 PE=1 SV=3	RBP4	23.01	47.3	7	7	7	7	728740000
Biological Process	GO:0048871	2	multicellular organismal homeostasis	2.1	0.000269926	P04264	Keratin, type II cytoskeletal 1 OS=Homo sapiens OX=9606 GN=KRT1 PE=1 SV=6	KRT1	66.038	73.1	166	58	52	58	20880000000
Biological Process	GO:0048871	2	multicellular organismal homeostasis	2.1	0.000269926	P05556	Integrin beta-1 OS=Homo sapiens OX=9606 GN=ITGB1 PE=1 SV=2	ITGB1	88.414	0	0	0	0	0	0
Biological Process	GO:0048871	2	multicellular organismal homeostasis	2.1	0.000269926	P07339	Cathepsin D OS=Homo sapiens OX=9606 GN=CTSD PE=1 SV=1	CTSD	44.552	9.7	4	3	3	3	29548000
Biological Process	GO:0048871	2	multicellular organismal homeostasis	2.1	0.000269926	P08779	Keratin, type I cytoskeletal 16 OS=Homo sapiens OX=9606 GN=KRT16 PE=1 SV=4	KRT16	51.267	33	9	16	7	7	65846000
Biological Process	GO:0048871	2	multicellular organismal homeostasis	2.1	0.000269926	P09619	Platelet-derived growth factor receptor beta OS=Homo sapiens OX=9606 GN=PDGFRB PE=1 SV=1	PDGFRB	123.97	2.9	3	2	2	2	4182400
Biological Process	GO:0048871	2	multicellular organismal homeostasis	2.1	0.000269926	P12830	Cadherin-1 OS=Homo sapiens OX=9606 GN=CDH1 PE=1 SV=3	CDH1	97.455	1.8	2	2	2	2	7974000
Biological Process	GO:0048871	2	multicellular organismal homeostasis	2.1	0.000269926	P18510	Interleukin-1 receptor antagonist protein OS=Homo sapiens OX=9606 GN=IL1RN PE=1 SV=1	IL1RN	20.055	0	0	0	0	0	0
Biological Process	GO:0048871	2	multicellular organismal homeostasis	2.1	0.000269926	P19012	Keratin, type I cytoskeletal 15 OS=Homo sapiens OX=9606 GN=KRT15 PE=1 SV=3	KRT15	49.211	0	0	0	0	0	0
Biological Process	GO:0048871	2	multicellular organismal homeostasis	2.1	0.000269926	P20930	Filaggrin OS=Homo sapiens OX=9606 GN=FLG PE=1 SV=3	FLG	435.16	5.3	5	5	5	5	3948300
Biological Process	GO:0048871	2	multicellular organismal homeostasis	2.1	0.000269926	P31947	14-3-3 protein sigma OS=Homo sapiens OX=9606 GN=SFN PE=1 SV=1	SFN	27.774	0	0	0	0	0	0
Biological Process	GO:0048871	2	multicellular organismal homeostasis	2.1	0.000269926	P35527	Keratin, type I cytoskeletal 9 OS=Homo sapiens OX=9606 GN=KRT9 PE=1 SV=3	KRT9	62.064	63.6	163	44	44	44	9025200000
Biological Process	GO:0022404	2	molting cycle process	3.35	0.000258098	P12830	Cadherin-1 OS=Homo sapiens OX=9606 GN=CDH1 PE=1 SV=3	CDH1	97.455	1.8	2	2	2	2	7974000
Biological Process	GO:0048871	2	multicellular organismal homeostasis	2.1	0.000269926	P35579	Myosin-9 OS=Homo sapiens OX=9606 GN=MYH9 PE=1 SV=4	MYH9	226.53	1.8	2	2	2	2	2939500
Biological Process	GO:0022404	2	molting cycle process	3.35	0.000258098	P08779	Keratin, type I cytoskeletal 16 OS=Homo sapiens OX=9606 GN=KRT16 PE=1 SV=4	KRT16	51.267	33	9	16	7	7	65846000
Biological Process	GO:0022404	2	molting cycle process	3.35	0.000258098	P00533	Epidermal growth factor receptor OS=Homo sapiens OX=9606 GN=EGFR PE=1 SV=2	EGFR	134.28	0	0	0	0	0	0
Biological Process	GO:0045918	5	negative regulation of cytolysis	12.28	0.000232046	P13647	Keratin, type II cytoskeletal 5 OS=Homo sapiens OX=9606 GN=KRT5 PE=1 SV=3	KRT5	62.378	41.4	43	29	16	22	662780000
Biological Process	GO:0045918	5	negative regulation of cytolysis	12.28	0.000232046	P48668	Keratin, type II cytoskeletal 6C OS=Homo sapiens OX=9606 GN=KRT6C PE=1 SV=3	KRT6C	60.024	42.4	16	25	0	11	157050000
Biological Process	GO:2000535	5	regulation of entry of bacterium into host cell	12.28	0.000232046	P02538	Keratin, type II cytoskeletal 6A OS=Homo sapiens OX=9606 GN=KRT6A PE=1 SV=3	KRT6A	60.044	42.4	3	24	2	2	61562000
Biological Process	GO:2000535	5	regulation of entry of bacterium into host cell	12.28	0.000232046	P04259	Keratin, type II cytoskeletal 6B OS=Homo sapiens OX=9606 GN=KRT6B PE=1 SV=5	KRT6B	60.066	36.3	3	23	2	2	10185000
Biological Process	GO:2000535	5	regulation of entry of bacterium into host cell	12.28	0.000232046	P13647	Keratin, type II cytoskeletal 5 OS=Homo sapiens OX=9606 GN=KRT5 PE=1 SV=3	KRT5	62.378	41.4	43	29	16	22	662780000
Biological Process	GO:2000535	5	regulation of entry of bacterium into host cell	12.28	0.000232046	P48668	Keratin, type II cytoskeletal 6C OS=Homo sapiens OX=9606 GN=KRT6C PE=1 SV=3	KRT6C	60.024	42.4	16	25	0	11	157050000
Biological Process	GO:0010712	4	regulation of collagen metabolic process	4.84	0.000233873	P05556	Integrin beta-1 OS=Homo sapiens OX=9606 GN=ITGB1 PE=1 SV=2	ITGB1	88.414	0	0	0	0	0	0
Biological Process	GO:0010712	4	regulation of collagen metabolic process	4.84	0.000233873	P08670	Vimentin OS=Homo sapiens OX=9606 GN=VIM PE=1 SV=4	VIM	53.651	0	0	0	0	0	0
Biological Process	GO:0010712	4	regulation of collagen metabolic process	4.84	0.000233873	P08697	Alpha-2-antiplasmin OS=Homo sapiens OX=9606 GN=SERPINF2 PE=1 SV=3	SERPINF2	54.565	17.9	7	6	6	6	283750000
Biological Process	GO:0010712	4	regulation of collagen metabolic process	4.84	0.000233873	P09619	Platelet-derived growth factor receptor beta OS=Homo sapiens OX=9606 GN=PDGFRB PE=1 SV=1	PDGFRB	123.97	2.9	3	2	2	2	4182400
Biological Process	GO:0010712	4	regulation of collagen metabolic process	4.84	0.000233873	P17174	Aspartate aminotransferase, cytoplasmic OS=Homo sapiens OX=9606 GN=GOT1 PE=1 SV=3	GOT1	46.247	3.6	1	1	1	1	3070800
Biological Process	GO:0010712	4	regulation of collagen metabolic process	4.84	0.000233873	P17813	Endoglin OS=Homo sapiens OX=9606 GN=ENG PE=1 SV=2	ENG	70.577	0	0	0	0	0	0
Biological Process	GO:0010712	4	regulation of collagen metabolic process	4.84	0.000233873	P27487	Dipeptidyl peptidase 4 OS=Homo sapiens OX=9606 GN=DPP4 PE=1 SV=2	DPP4	88.278	15	7	8	8	8	79452000
Biological Process	GO:0010712	4	regulation of collagen metabolic process	4.84	0.000233873	P01034	Cystatin-C OS=Homo sapiens OX=9606 GN=CST3 PE=1 SV=1	CST3	15.799	23.3	3	3	3	3	14030000
Biological Process	GO:0009185	6	ribonucleoside diphosphate metabolic process	4.28	0.000249667	P00338	L-lactate dehydrogenase A chain OS=Homo sapiens OX=9606 GN=LDHA PE=1 SV=2	LDHA	36.688	0	0	0	0	0	0
Biological Process	GO:0009185	6	ribonucleoside diphosphate metabolic process	4.28	0.000249667	P00558	Phosphoglycerate kinase 1 OS=Homo sapiens OX=9606 GN=PGK1 PE=1 SV=3	PGK1	44.614	0	0	0	0	0	0
Biological Process	GO:0009185	6	ribonucleoside diphosphate metabolic process	4.28	0.000249667	P04075	Fructose-bisphosphate aldolase A OS=Homo sapiens OX=9606 GN=ALDOA PE=1 SV=2	ALDOA	39.42	4.9	1	1	1	1	12992000
Biological Process	GO:0009185	6	ribonucleoside diphosphate metabolic process	4.28	0.000249667	P04406	Glyceraldehyde-3-phosphate dehydrogenase OS=Homo sapiens OX=9606 GN=GAPDH PE=1 SV=3	GAPDH	36.053	28.7	5	6	6	6	28325000
Biological Process	GO:0009185	6	ribonucleoside diphosphate metabolic process	4.28	0.000249667	P06733	Alpha-enolase OS=Homo sapiens OX=9606 GN=ENO1 PE=1 SV=2	ENO1	47.168	4.4	1	1	1	1	3345600
Biological Process	GO:0009185	6	ribonucleoside diphosphate metabolic process	4.28	0.000249667	P14618	Pyruvate kinase PKM OS=Homo sapiens OX=9606 GN=PKM PE=1 SV=4	PKM	57.936	0	0	0	0	0	0
Biological Process	GO:0009185	6	ribonucleoside diphosphate metabolic process	4.28	0.000249667	P15259	Phosphoglycerate mutase 2 OS=Homo sapiens OX=9606 GN=PGAM2 PE=1 SV=3	PGAM2	28.766	0	0	0	0	0	0
Biological Process	GO:0009185	6	ribonucleoside diphosphate metabolic process	4.28	0.000249667	P60174	Triosephosphate isomerase OS=Homo sapiens OX=9606 GN=TPI1 PE=1 SV=4	TPI1	26.669	0	0	0	0	0	0
Biological Process	GO:0009185	6	ribonucleoside diphosphate metabolic process	4.28	0.000249667	P07738	Bisphosphoglycerate mutase OS=Homo sapiens OX=9606 GN=BPGM PE=1 SV=2	BPGM	30.005	0	0	0	0	0	0
Biological Process	GO:0022404	2	molting cycle process	3.35	0.000258098	P07108	Acyl-CoA-binding protein OS=Homo sapiens OX=9606 GN=DBI PE=1 SV=2	DBI	10.044	0	0	0	0	0	0
Biological Process	GO:0048871	2	multicellular organismal homeostasis	2.1	0.000269926	P35908	Keratin, type II cytoskeletal 2 epidermal OS=Homo sapiens OX=9606 GN=KRT2 PE=1 SV=2	KRT2	65.432	76.8	101	48	35	44	4005200000
Biological Process	GO:0048871	2	multicellular organismal homeostasis	2.1	0.000269926	Q04695	Keratin, type I cytoskeletal 17 OS=Homo sapiens OX=9606 GN=KRT17 PE=1 SV=2	KRT17	48.105	32.6	5	10	5	5	28013000
Biological Process	GO:0048871	2	multicellular organismal homeostasis	2.1	0.000269926	Q05707	Collagen alpha-1(XIV) chain OS=Homo sapiens OX=9606 GN=COL14A1 PE=1 SV=3	COL14A1	193.51	0	0	0	0	0	0
Biological Process	GO:0043434	4	response to peptide hormone	2.01	0.000294202	P00739	Haptoglobin-related protein OS=Homo sapiens OX=9606 GN=HPR PE=2 SV=2	HPR	39.029	34.2	5	14	3	3	169590000
Biological Process	GO:0043434	4	response to peptide hormone	2.01	0.000294202	P00918	Carbonic anhydrase 2 OS=Homo sapiens OX=9606 GN=CA2 PE=1 SV=2	CA2	29.246	0	0	0	0	0	0
Biological Process	GO:0043434	4	response to peptide hormone	2.01	0.000294202	P01009	Alpha-1-antitrypsin OS=Homo sapiens OX=9606 GN=SERPINA1 PE=1 SV=3	SERPINA1	46.736	38.3	20	13	13	13	1081600000
Biological Process	GO:0043434	4	response to peptide hormone	2.01	0.000294202	P01011	Alpha-1-antichymotrypsin OS=Homo sapiens OX=9606 GN=SERPINA3 PE=1 SV=2	SERPINA3	47.65	16.8	5	5	5	5	76232000
Biological Process	GO:0043434	4	response to peptide hormone	2.01	0.000294202	P01019	Angiotensinogen OS=Homo sapiens OX=9606 GN=AGT PE=1 SV=3	AGT	53.154	7.6	3	3	3	3	91548000
Biological Process	GO:0043434	4	response to peptide hormone	2.01	0.000294202	P02656	Apolipoprotein C-III OS=Homo sapiens OX=9606 GN=APOC3 PE=1 SV=1	APOC3	10.852	0	0	0	0	0	0
Biological Process	GO:0043434	4	response to peptide hormone	2.01	0.000294202	P02753	Retinol-binding protein 4 OS=Homo sapiens OX=9606 GN=RBP4 PE=1 SV=3	RBP4	23.01	47.3	7	7	7	7	728740000
Biological Process	GO:0043434	4	response to peptide hormone	2.01	0.000294202	P02763	Alpha-1-acid glycoprotein 1 OS=Homo sapiens OX=9606 GN=ORM1 PE=1 SV=2	ORM1	23.539	41.8	11	8	6	6	3742300000
Biological Process	GO:0043434	4	response to peptide hormone	2.01	0.000294202	P02765	Alpha-2-HS-glycoprotein OS=Homo sapiens OX=9606 GN=AHSG PE=1 SV=2	AHSG	39.34	23.2	41	7	7	7	4512000000
Biological Process	GO:0043434	4	response to peptide hormone	2.01	0.000294202	P04040	Catalase OS=Homo sapiens OX=9606 GN=CAT PE=1 SV=3	CAT	59.755	8.7	2	2	2	2	7648000
Biological Process	GO:0043434	4	response to peptide hormone	2.01	0.000294202	P04083	Annexin A1 OS=Homo sapiens OX=9606 GN=ANXA1 PE=1 SV=2	ANXA1	38.714	0	0	0	0	0	0
Biological Process	GO:0043434	4	response to peptide hormone	2.01	0.000294202	P04792	Heat shock protein beta-1 OS=Homo sapiens OX=9606 GN=HSPB1 PE=1 SV=2	HSPB1	22.782	7.8	1	1	1	1	1730200
Biological Process	GO:0043434	4	response to peptide hormone	2.01	0.000294202	P05089	Arginase-1 OS=Homo sapiens OX=9606 GN=ARG1 PE=1 SV=2	ARG1	34.735	8.4	5	3	3	3	32997000
Biological Process	GO:0043434	4	response to peptide hormone	2.01	0.000294202	P05362	Intercellular adhesion molecule 1 OS=Homo sapiens OX=9606 GN=ICAM1 PE=1 SV=2	ICAM1	57.825	0	0	0	0	0	0
Biological Process	GO:0043434	4	response to peptide hormone	2.01	0.000294202	P05543	Thyroxine-binding globulin OS=Homo sapiens OX=9606 GN=SERPINA7 PE=1 SV=2	SERPINA7	46.324	13.7	13	6	6	6	768030000
Biological Process	GO:0043434	4	response to peptide hormone	2.01	0.000294202	P09211	Glutathione S-transferase P OS=Homo sapiens OX=9606 GN=GSTP1 PE=1 SV=2	GSTP1	23.356	0	0	0	0	0	0
Biological Process	GO:0043434	4	response to peptide hormone	2.01	0.000294202	P14174	Macrophage migration inhibitory factor OS=Homo sapiens OX=9606 GN=MIF PE=1 SV=4	MIF	12.476	0	0	0	0	0	0
Biological Process	GO:0043434	4	response to peptide hormone	2.01	0.000294202	P14618	Pyruvate kinase PKM OS=Homo sapiens OX=9606 GN=PKM PE=1 SV=4	PKM	57.936	0	0	0	0	0	0
Biological Process	GO:0043434	4	response to peptide hormone	2.01	0.000294202	P14735	Insulin-degrading enzyme OS=Homo sapiens OX=9606 GN=IDE PE=1 SV=4	IDE	117.97	0	0	0	0	0	0
Biological Process	GO:0043434	4	response to peptide hormone	2.01	0.000294202	P16885	1-phosphatidylinositol 4,5-bisphosphate phosphodiesterase gamma-2 OS=Homo sapiens OX=9606 GN=PLCG2 PE=1 SV=4	PLCG2	147.87	0	0	0	0	0	0
Biological Process	GO:0043434	4	response to peptide hormone	2.01	0.000294202	P17174	Aspartate aminotransferase, cytoplasmic OS=Homo sapiens OX=9606 GN=GOT1 PE=1 SV=3	GOT1	46.247	3.6	1	1	1	1	3070800
Biological Process	GO:0043434	4	response to peptide hormone	2.01	0.000294202	P19652	Alpha-1-acid glycoprotein 2 OS=Homo sapiens OX=9606 GN=ORM2 PE=1 SV=2	ORM2	23.602	34.8	25	8	6	8	4912700000
Biological Process	GO:0043434	4	response to peptide hormone	2.01	0.000294202	P21281	V-type proton ATPase subunit B, brain isoform OS=Homo sapiens OX=9606 GN=ATP6V1B2 PE=1 SV=3	ATP6V1B2	56.5	0	0	0	0	0	0
Biological Process	GO:0043434	4	response to peptide hormone	2.01	0.000294202	P00738	Haptoglobin OS=Homo sapiens OX=9606 GN=HP PE=1 SV=1	HP	45.205	53.7	182	24	13	24	96502000000
Biological Process	GO:0006879	8	cellular iron ion homeostasis	4.7	0.000288178	P80188	Neutrophil gelatinase-associated lipocalin OS=Homo sapiens OX=9606 GN=LCN2 PE=1 SV=2	LCN2	22.588	0	0	0	0	0	0
Biological Process	GO:0006879	8	cellular iron ion homeostasis	4.7	0.000288178	P28676	Grancalcin OS=Homo sapiens OX=9606 GN=GCA PE=1 SV=2	GCA	24.01	0	0	0	0	0	0
Biological Process	GO:0006879	8	cellular iron ion homeostasis	4.7	0.000288178	P09601	Heme oxygenase 1 OS=Homo sapiens OX=9606 GN=HMOX1 PE=1 SV=1	HMOX1	32.818	0	0	0	0	0	0
Biological Process	GO:0048871	2	multicellular organismal homeostasis	2.1	0.000269926	Q5D862	Filaggrin-2 OS=Homo sapiens OX=9606 GN=FLG2 PE=1 SV=1	FLG2	248.07	7.8	12	7	7	7	82713000
Biological Process	GO:0048871	2	multicellular organismal homeostasis	2.1	0.000269926	Q86YZ3	Hornerin OS=Homo sapiens OX=9606 GN=HRNR PE=1 SV=2	HRNR	282.39	32.3	116	39	39	39	1976500000
Biological Process	GO:0048871	2	multicellular organismal homeostasis	2.1	0.000269926	Q8IZF2	Adhesion G protein-coupled receptor F5 OS=Homo sapiens OX=9606 GN=ADGRF5 PE=1 SV=3	ADGRF5	149.46	0	0	0	0	0	0
Biological Process	GO:0048871	2	multicellular organismal homeostasis	2.1	0.000269926	Q8NEV4	Myosin-IIIa OS=Homo sapiens OX=9606 GN=MYO3A PE=1 SV=2	MYO3A	186.21	0	0	0	0	0	0
Biological Process	GO:0048871	2	multicellular organismal homeostasis	2.1	0.000269926	Q8TDY2	RB1-inducible coiled-coil protein 1 OS=Homo sapiens OX=9606 GN=RB1CC1 PE=1 SV=3	RB1CC1	183.09	0	0	0	0	0	0
Biological Process	GO:0048871	2	multicellular organismal homeostasis	2.1	0.000269926	Q9Y3M8	StAR-related lipid transfer protein 13 OS=Homo sapiens OX=9606 GN=STARD13 PE=1 SV=2	STARD13	124.97	0	0	0	0	0	0
Biological Process	GO:0048871	2	multicellular organismal homeostasis	2.1	0.000269926	O94759	Transient receptor potential cation channel subfamily M member 2 OS=Homo sapiens OX=9606 GN=TRPM2 PE=1 SV=2	TRPM2	171.2	0	0	0	0	0	0
Biological Process	GO:0048871	2	multicellular organismal homeostasis	2.1	0.000269926	P13646	Keratin, type I cytoskeletal 13 OS=Homo sapiens OX=9606 GN=KRT13 PE=1 SV=4	KRT13	49.588	6.6	1	2	1	1	681050
Biological Process	GO:0010984	4	regulation of lipoprotein particle clearance	8.32	0.000276356	P02654	Apolipoprotein C-I OS=Homo sapiens OX=9606 GN=APOC1 PE=1 SV=1	APOC1	9.3318	34.9	3	3	3	3	164400000
Biological Process	GO:0010984	4	regulation of lipoprotein particle clearance	8.32	0.000276356	P02655	Apolipoprotein C-II OS=Homo sapiens OX=9606 GN=APOC2 PE=1 SV=1	APOC2	11.284	19.8	3	2	2	2	111850000
Biological Process	GO:0010984	4	regulation of lipoprotein particle clearance	8.32	0.000276356	P02656	Apolipoprotein C-III OS=Homo sapiens OX=9606 GN=APOC3 PE=1 SV=1	APOC3	10.852	0	0	0	0	0	0
Biological Process	GO:0050793	3	regulation of developmental process	1.33	0.00030891	P38646	Stress-70 protein, mitochondrial OS=Homo sapiens OX=9606 GN=HSPA9 PE=1 SV=2	HSPA9	73.68	0	0	0	0	0	0
Biological Process	GO:0010984	4	regulation of lipoprotein particle clearance	8.32	0.000276356	P07355	Annexin A2 OS=Homo sapiens OX=9606 GN=ANXA2 PE=1 SV=2	ANXA2	38.604	15.3	4	4	4	4	8350100
Biological Process	GO:0014002	5	astrocyte development	6.47	0.000287113	P00533	Epidermal growth factor receptor OS=Homo sapiens OX=9606 GN=EGFR PE=1 SV=2	EGFR	134.28	0	0	0	0	0	0
Biological Process	GO:0014002	5	astrocyte development	6.47	0.000287113	P01019	Angiotensinogen OS=Homo sapiens OX=9606 GN=AGT PE=1 SV=3	AGT	53.154	7.6	3	3	3	3	91548000
Biological Process	GO:0014002	5	astrocyte development	6.47	0.000287113	P05109	Protein S100-A8 OS=Homo sapiens OX=9606 GN=S100A8 PE=1 SV=1	S100A8	10.834	0	0	0	0	0	0
Biological Process	GO:0014002	5	astrocyte development	6.47	0.000287113	P06702	Protein S100-A9 OS=Homo sapiens OX=9606 GN=S100A9 PE=1 SV=1	S100A9	13.242	43	4	3	3	3	31021000
Biological Process	GO:0014002	5	astrocyte development	6.47	0.000287113	P08670	Vimentin OS=Homo sapiens OX=9606 GN=VIM PE=1 SV=4	VIM	53.651	0	0	0	0	0	0
Biological Process	GO:0014002	5	astrocyte development	6.47	0.000287113	Q07954	Prolow-density lipoprotein receptor-related protein 1 OS=Homo sapiens OX=9606 GN=LRP1 PE=1 SV=2	LRP1	504.6	0	0	0	0	0	0
Biological Process	GO:0006879	8	cellular iron ion homeostasis	4.7	0.000288178	P00441	Superoxide dismutase [Cu-Zn] OS=Homo sapiens OX=9606 GN=SOD1 PE=1 SV=2	SOD1	15.936	0	0	0	0	0	0
Biological Process	GO:0006879	8	cellular iron ion homeostasis	4.7	0.000288178	P00450	Ceruloplasmin OS=Homo sapiens OX=9606 GN=CP PE=1 SV=1	CP	122.2	22.9	25	17	17	17	892180000
Biological Process	GO:0006879	8	cellular iron ion homeostasis	4.7	0.000288178	P02787	Serotransferrin OS=Homo sapiens OX=9606 GN=TF PE=1 SV=4	TF	77.049	60.5	160	43	43	43	50131000000
Biological Process	GO:0006879	8	cellular iron ion homeostasis	4.7	0.000288178	P02788	Lactotransferrin OS=Homo sapiens OX=9606 GN=LTF PE=1 SV=6	LTF	78.181	16.3	11	9	9	9	133970000
Biological Process	GO:0006879	8	cellular iron ion homeostasis	4.7	0.000288178	P02790	Hemopexin OS=Homo sapiens OX=9606 GN=HPX PE=1 SV=2	HPX	51.676	63	99	20	20	20	81563000000
Biological Process	GO:0010984	4	regulation of lipoprotein particle clearance	8.32	0.000276356	P80108	Phosphatidylinositol-glycan-specific phospholipase D OS=Homo sapiens OX=9606 GN=GPLD1 PE=1 SV=3	GPLD1	92.335	7.7	5	5	5	5	109680000
Biological Process	GO:0051851	4	modulation by host of symbiont process	3.66	0.000410095	P04406	Glyceraldehyde-3-phosphate dehydrogenase OS=Homo sapiens OX=9606 GN=GAPDH PE=1 SV=3	GAPDH	36.053	28.7	5	6	6	6	28325000
Biological Process	GO:0050793	3	regulation of developmental process	1.33	0.00030891	P42224	Signal transducer and activator of transcription 1-alpha/beta OS=Homo sapiens OX=9606 GN=STAT1 PE=1 SV=2	STAT1	87.334	0	0	0	0	0	0
Biological Process	GO:0050793	3	regulation of developmental process	1.33	0.00030891	P47756	F-actin-capping protein subunit beta OS=Homo sapiens OX=9606 GN=CAPZB PE=1 SV=5	CAPZB	30.628	0	0	0	0	0	0
Biological Process	GO:1902531	5	regulation of intracellular signal transduction	1.44	0.000321499	Q8TDY2	RB1-inducible coiled-coil protein 1 OS=Homo sapiens OX=9606 GN=RB1CC1 PE=1 SV=3	RB1CC1	183.09	0	0	0	0	0	0
Biological Process	GO:1902531	5	regulation of intracellular signal transduction	1.44	0.000321499	Q969H8	Myeloid-derived growth factor OS=Homo sapiens OX=9606 GN=MYDGF PE=1 SV=1	MYDGF	18.795	0	0	0	0	0	0
Biological Process	GO:1902531	5	regulation of intracellular signal transduction	1.44	0.000321499	Q96EP0	E3 ubiquitin-protein ligase RNF31 OS=Homo sapiens OX=9606 GN=RNF31 PE=1 SV=1	RNF31	119.65	0	0	0	0	0	0
Biological Process	GO:1902531	5	regulation of intracellular signal transduction	1.44	0.000321499	Q96P63	Serpin B12 OS=Homo sapiens OX=9606 GN=SERPINB12 PE=1 SV=1	SERPINB12	46.276	3	1	1	1	1	3836800
Biological Process	GO:1902531	5	regulation of intracellular signal transduction	1.44	0.000321499	Q9UHA4	Ragulator complex protein LAMTOR3 OS=Homo sapiens OX=9606 GN=LAMTOR3 PE=1 SV=1	LAMTOR3	13.623	0	0	0	0	0	0
Biological Process	GO:1902531	5	regulation of intracellular signal transduction	1.44	0.000321499	Q9UIV8	Serpin B13 OS=Homo sapiens OX=9606 GN=SERPINB13 PE=1 SV=2	SERPINB13	44.276	0	0	0	0	0	0
Biological Process	GO:1902531	5	regulation of intracellular signal transduction	1.44	0.000321499	Q9Y3M8	StAR-related lipid transfer protein 13 OS=Homo sapiens OX=9606 GN=STARD13 PE=1 SV=2	STARD13	124.97	0	0	0	0	0	0
Biological Process	GO:1902531	5	regulation of intracellular signal transduction	1.44	0.000321499	O75340	Programmed cell death protein 6 OS=Homo sapiens OX=9606 GN=PDCD6 PE=1 SV=1	PDCD6	21.868	0	0	0	0	0	0
Biological Process	GO:1902531	5	regulation of intracellular signal transduction	1.44	0.000321499	O75553	Disabled homolog 1 OS=Homo sapiens OX=9606 GN=DAB1 PE=1 SV=3	DAB1	63.774	0	0	0	0	0	0
Biological Process	GO:1902531	5	regulation of intracellular signal transduction	1.44	0.000321499	P13598	Intercellular adhesion molecule 2 OS=Homo sapiens OX=9606 GN=ICAM2 PE=1 SV=2	ICAM2	30.654	0	0	0	0	0	0
Biological Process	GO:1902531	5	regulation of intracellular signal transduction	1.44	0.000321499	P48764	Sodium/hydrogen exchanger 3 OS=Homo sapiens OX=9606 GN=SLC9A3 PE=1 SV=2	SLC9A3	92.853	0	0	0	0	0	0
Biological Process	GO:1902531	5	regulation of intracellular signal transduction	1.44	0.000321499	P52566	Rho GDP-dissociation inhibitor 2 OS=Homo sapiens OX=9606 GN=ARHGDIB PE=1 SV=3	ARHGDIB	22.988	0	0	0	0	0	0
Biological Process	GO:1902531	5	regulation of intracellular signal transduction	1.44	0.000321499	P55290	Cadherin-13 OS=Homo sapiens OX=9606 GN=CDH13 PE=1 SV=1	CDH13	78.286	0	0	0	0	0	0
Biological Process	GO:1902531	5	regulation of intracellular signal transduction	1.44	0.000321499	Q02763	Angiopoietin-1 receptor OS=Homo sapiens OX=9606 GN=TEK PE=1 SV=2	TEK	125.83	0	0	0	0	0	0
Biological Process	GO:1902531	5	regulation of intracellular signal transduction	1.44	0.000321499	Q9BZF9	Uveal autoantigen with coiled-coil domains and ankyrin repeats OS=Homo sapiens OX=9606 GN=UACA PE=1 SV=2	UACA	162.5	0	0	0	0	0	0
Biological Process	GO:1902531	5	regulation of intracellular signal transduction	1.44	0.000321499	P00746	Complement factor D OS=Homo sapiens OX=9606 GN=CFD PE=1 SV=5	CFD	27.033	0	0	0	0	0	0
Biological Process	GO:1902531	5	regulation of intracellular signal transduction	1.44	0.000321499	P0C0L4	Complement C4-A OS=Homo sapiens OX=9606 GN=C4A PE=1 SV=2	C4A	192.78	0	0	0	0	0	0
Biological Process	GO:1902531	5	regulation of intracellular signal transduction	1.44	0.000321499	P19022	Cadherin-2 OS=Homo sapiens OX=9606 GN=CDH2 PE=1 SV=4	CDH2	99.808	0	0	0	0	0	0
Biological Process	GO:1902531	5	regulation of intracellular signal transduction	1.44	0.000321499	P98174	FYVE, RhoGEF and PH domain-containing protein 1 OS=Homo sapiens OX=9606 GN=FGD1 PE=1 SV=2	FGD1	106.56	0	0	0	0	0	0
Biological Process	GO:1902531	5	regulation of intracellular signal transduction	1.44	0.000321499	Q8IWV7	E3 ubiquitin-protein ligase UBR1 OS=Homo sapiens OX=9606 GN=UBR1 PE=1 SV=1	UBR1	200.21	0	0	0	0	0	0
Biological Process	GO:1902531	5	regulation of intracellular signal transduction	1.44	0.000321499	Q96KB5	Lymphokine-activated killer T-cell-originated protein kinase OS=Homo sapiens OX=9606 GN=PBK PE=1 SV=3	PBK	36.085	0	0	0	0	0	0
Biological Process	GO:1902531	5	regulation of intracellular signal transduction	1.44	0.000321499	Q9H4G4	Golgi-associated plant pathogenesis-related protein 1 OS=Homo sapiens OX=9606 GN=GLIPR2 PE=1 SV=3	GLIPR2	17.218	0	0	0	0	0	0
Biological Process	GO:0046470	4	phosphatidylcholine metabolic process	4.13	0.000325673	P02647	Apolipoprotein A-I OS=Homo sapiens OX=9606 GN=APOA1 PE=1 SV=1	APOA1	30.777	20.6	5	5	5	5	76295000
Biological Process	GO:1902531	5	regulation of intracellular signal transduction	1.44	0.000321499	Q86SG5	Protein S100-A7A OS=Homo sapiens OX=9606 GN=S100A7A PE=1 SV=3	S100A7A	11.305	0	0	0	0	0	0
Biological Process	GO:0046470	4	phosphatidylcholine metabolic process	4.13	0.000325673	P02652	Apolipoprotein A-II OS=Homo sapiens OX=9606 GN=APOA2 PE=1 SV=1	APOA2	11.175	19	7	3	3	3	7512000000
Biological Process	GO:1902531	5	regulation of intracellular signal transduction	1.44	0.000321499	Q12913	Receptor-type tyrosine-protein phosphatase eta OS=Homo sapiens OX=9606 GN=PTPRJ PE=1 SV=3	PTPRJ	145.94	2.7	3	3	3	3	26199000
Biological Process	GO:1902531	5	regulation of intracellular signal transduction	1.44	0.000321499	Q06830	Peroxiredoxin-1 OS=Homo sapiens OX=9606 GN=PRDX1 PE=1 SV=1	PRDX1	22.11	9	1	1	1	1	1860400
Biological Process	GO:1902531	5	regulation of intracellular signal transduction	1.44	0.000321499	P18510	Interleukin-1 receptor antagonist protein OS=Homo sapiens OX=9606 GN=IL1RN PE=1 SV=1	IL1RN	20.055	0	0	0	0	0	0
Biological Process	GO:1902531	5	regulation of intracellular signal transduction	1.44	0.000321499	P19784	Casein kinase II subunit alpha' OS=Homo sapiens OX=9606 GN=CSNK2A2 PE=1 SV=1	CSNK2A2	41.213	0	0	0	0	0	0
Biological Process	GO:1902531	5	regulation of intracellular signal transduction	1.44	0.000321499	P21333	Filamin-A OS=Homo sapiens OX=9606 GN=FLNA PE=1 SV=4	FLNA	280.74	0	0	0	0	0	0
Biological Process	GO:1902531	5	regulation of intracellular signal transduction	1.44	0.000321499	P28676	Grancalcin OS=Homo sapiens OX=9606 GN=GCA PE=1 SV=2	GCA	24.01	0	0	0	0	0	0
Biological Process	GO:1902531	5	regulation of intracellular signal transduction	1.44	0.000321499	P29508	Serpin B3 OS=Homo sapiens OX=9606 GN=SERPINB3 PE=1 SV=2	SERPINB3	44.564	0	0	0	0	0	0
Biological Process	GO:1902531	5	regulation of intracellular signal transduction	1.44	0.000321499	P30086	Phosphatidylethanolamine-binding protein 1 OS=Homo sapiens OX=9606 GN=PEBP1 PE=1 SV=3	PEBP1	21.057	0	0	0	0	0	0
Biological Process	GO:1902531	5	regulation of intracellular signal transduction	1.44	0.000321499	P30530	Tyrosine-protein kinase receptor UFO OS=Homo sapiens OX=9606 GN=AXL PE=1 SV=4	AXL	98.336	0	0	0	0	0	0
Biological Process	GO:1902531	5	regulation of intracellular signal transduction	1.44	0.000321499	P30740	Leukocyte elastase inhibitor OS=Homo sapiens OX=9606 GN=SERPINB1 PE=1 SV=1	SERPINB1	42.741	0	0	0	0	0	0
Biological Process	GO:1902531	5	regulation of intracellular signal transduction	1.44	0.000321499	P31151	Protein S100-A7 OS=Homo sapiens OX=9606 GN=S100A7 PE=1 SV=4	S100A7	11.471	14.9	5	3	3	3	18159000
Biological Process	GO:1902531	5	regulation of intracellular signal transduction	1.44	0.000321499	P32119	Peroxiredoxin-2 OS=Homo sapiens OX=9606 GN=PRDX2 PE=1 SV=5	PRDX2	21.892	0	0	0	0	0	0
Biological Process	GO:1902531	5	regulation of intracellular signal transduction	1.44	0.000321499	P35232	Prohibitin 1 OS=Homo sapiens OX=9606 GN=PHB1 PE=1 SV=1	PHB1	29.804	0	0	0	0	0	0
Biological Process	GO:1902531	5	regulation of intracellular signal transduction	1.44	0.000321499	P35579	Myosin-9 OS=Homo sapiens OX=9606 GN=MYH9 PE=1 SV=4	MYH9	226.53	1.8	2	2	2	2	2939500
Biological Process	GO:1902531	5	regulation of intracellular signal transduction	1.44	0.000321499	P42224	Signal transducer and activator of transcription 1-alpha/beta OS=Homo sapiens OX=9606 GN=STAT1 PE=1 SV=2	STAT1	87.334	0	0	0	0	0	0
Biological Process	GO:1902531	5	regulation of intracellular signal transduction	1.44	0.000321499	P46939	Utrophin OS=Homo sapiens OX=9606 GN=UTRN PE=1 SV=2	UTRN	394.46	0.5	1	1	1	1	0
Biological Process	GO:1902531	5	regulation of intracellular signal transduction	1.44	0.000321499	P47756	F-actin-capping protein subunit beta OS=Homo sapiens OX=9606 GN=CAPZB PE=1 SV=5	CAPZB	30.628	0	0	0	0	0	0
Biological Process	GO:1902531	5	regulation of intracellular signal transduction	1.44	0.000321499	P49662	Caspase-4 OS=Homo sapiens OX=9606 GN=CASP4 PE=1 SV=1	CASP4	43.262	4	6	1	1	1	29842000
Biological Process	GO:1902531	5	regulation of intracellular signal transduction	1.44	0.000321499	P50395	Rab GDP dissociation inhibitor beta OS=Homo sapiens OX=9606 GN=GDI2 PE=1 SV=2	GDI2	50.663	0	0	0	0	0	0
Biological Process	GO:1902531	5	regulation of intracellular signal transduction	1.44	0.000321499	P51812	Ribosomal protein S6 kinase alpha-3 OS=Homo sapiens OX=9606 GN=RPS6KA3 PE=1 SV=1	RPS6KA3	83.735	1.2	1	1	1	1	0
Biological Process	GO:1902531	5	regulation of intracellular signal transduction	1.44	0.000321499	P52907	F-actin-capping protein subunit alpha-1 OS=Homo sapiens OX=9606 GN=CAPZA1 PE=1 SV=3	CAPZA1	32.922	0	0	0	0	0	0
Biological Process	GO:1902531	5	regulation of intracellular signal transduction	1.44	0.000321499	P62081	40S ribosomal protein S7 OS=Homo sapiens OX=9606 GN=RPS7 PE=1 SV=1	RPS7	22.127	0	0	0	0	0	0
Biological Process	GO:1902531	5	regulation of intracellular signal transduction	1.44	0.000321499	P63244	Receptor of activated protein C kinase 1 OS=Homo sapiens OX=9606 GN=RACK1 PE=1 SV=3	RACK1	35.076	0	0	0	0	0	0
Biological Process	GO:1902531	5	regulation of intracellular signal transduction	1.44	0.000321499	P78417	Glutathione S-transferase omega-1 OS=Homo sapiens OX=9606 GN=GSTO1 PE=1 SV=2	GSTO1	27.566	0	0	0	0	0	0
Biological Process	GO:1902531	5	regulation of intracellular signal transduction	1.44	0.000321499	P80511	Protein S100-A12 OS=Homo sapiens OX=9606 GN=S100A12 PE=1 SV=2	S100A12	10.575	0	0	0	0	0	0
Biological Process	GO:1902531	5	regulation of intracellular signal transduction	1.44	0.000321499	Q10588	ADP-ribosyl cyclase/cyclic ADP-ribose hydrolase 2 OS=Homo sapiens OX=9606 GN=BST1 PE=1 SV=2	BST1	35.724	7.9	2	2	2	2	26770000
Biological Process	GO:1902531	5	regulation of intracellular signal transduction	1.44	0.000321499	P17813	Endoglin OS=Homo sapiens OX=9606 GN=ENG PE=1 SV=2	ENG	70.577	0	0	0	0	0	0
Biological Process	GO:0046470	4	phosphatidylcholine metabolic process	4.13	0.000325673	P04180	Phosphatidylcholine-sterol acyltransferase OS=Homo sapiens OX=9606 GN=LCAT PE=1 SV=1	LCAT	49.577	23.9	9	7	7	7	281860000
Biological Process	GO:0046470	4	phosphatidylcholine metabolic process	4.13	0.000325673	P07108	Acyl-CoA-binding protein OS=Homo sapiens OX=9606 GN=DBI PE=1 SV=2	DBI	10.044	0	0	0	0	0	0
Biological Process	GO:0010758	6	regulation of macrophage chemotaxis	6.3	0.000333823	P0C0L5	Complement C4-B OS=Homo sapiens OX=9606 GN=C4B_2 PE=1 SV=2	C4B_2	192.75	2.9	4	3	3	3	50961000
Biological Process	GO:0010758	6	regulation of macrophage chemotaxis	6.3	0.000333823	P14174	Macrophage migration inhibitory factor OS=Homo sapiens OX=9606 GN=MIF PE=1 SV=4	MIF	12.476	0	0	0	0	0	0
Biological Process	GO:0010758	6	regulation of macrophage chemotaxis	6.3	0.000333823	Q12913	Receptor-type tyrosine-protein phosphatase eta OS=Homo sapiens OX=9606 GN=PTPRJ PE=1 SV=3	PTPRJ	145.94	2.7	3	3	3	3	26199000
Biological Process	GO:0010758	6	regulation of macrophage chemotaxis	6.3	0.000333823	P0C0L4	Complement C4-A OS=Homo sapiens OX=9606 GN=C4A PE=1 SV=2	C4A	192.78	0	0	0	0	0	0
Biological Process	GO:0006910	3	phagocytosis, recognition	6.3	0.000333823	P01857	Immunoglobulin heavy constant gamma 1 OS=Homo sapiens OX=9606 GN=IGHG1 PE=1 SV=1	IGHG1	36.105	20.3	2	4	2	2	31089000
Biological Process	GO:0006910	3	phagocytosis, recognition	6.3	0.000333823	P01861	Immunoglobulin heavy constant gamma 4 OS=Homo sapiens OX=9606 GN=IGHG4 PE=1 SV=1	IGHG4	35.94	17.4	3	4	1	2	27336000
Biological Process	GO:0006910	3	phagocytosis, recognition	6.3	0.000333823	P0DOY3	Immunoglobulin lambda constant 3 OS=Homo sapiens OX=9606 GN=IGLC3 PE=1 SV=1	IGLC3	11.265	37.7	8	3	1	3	530400000
Biological Process	GO:0006910	3	phagocytosis, recognition	6.3	0.000333823	P0CG04	Immunoglobulin lambda constant 1 OS=Homo sapiens OX=9606 GN=IGLC1 PE=1 SV=1	IGLC1	11.348	37.7	1	3	1	1	11841000
Biological Process	GO:0006910	3	phagocytosis, recognition	6.3	0.000333823	P01859	Immunoglobulin heavy constant gamma 2 OS=Homo sapiens OX=9606 GN=IGHG2 PE=1 SV=2	IGHG2	35.9	24.5	4	4	2	4	304010000
Biological Process	GO:0006910	3	phagocytosis, recognition	6.3	0.000333823	P01860	Immunoglobulin heavy constant gamma 3 OS=Homo sapiens OX=9606 GN=IGHG3 PE=1 SV=2	IGHG3	41.287	7.4	1	2	1	1	17716000
Biological Process	GO:0023051	3	regulation of signaling	1.29	0.000337386	A8K2U0	Alpha-2-macroglobulin-like protein 1 OS=Homo sapiens OX=9606 GN=A2ML1 PE=1 SV=3	A2ML1	161.1	0	0	0	0	0	0
Biological Process	GO:0023051	3	regulation of signaling	1.29	0.000337386	O00303	Eukaryotic translation initiation factor 3 subunit F OS=Homo sapiens OX=9606 GN=EIF3F PE=1 SV=1	EIF3F	37.563	0	0	0	0	0	0
Biological Process	GO:0023051	3	regulation of signaling	1.29	0.000337386	O00327	Basic helix-loop-helix ARNT-like protein 1 OS=Homo sapiens OX=9606 GN=BMAL1 PE=1 SV=2	BMAL1	68.761	0	0	0	0	0	0
Biological Process	GO:0023051	3	regulation of signaling	1.29	0.000337386	O15195	Villin-like protein OS=Homo sapiens OX=9606 GN=VILL PE=1 SV=3	VILL	95.906	3.4	2	2	2	2	17286000
Biological Process	GO:0023051	3	regulation of signaling	1.29	0.000337386	O43707	Alpha-actinin-4 OS=Homo sapiens OX=9606 GN=ACTN4 PE=1 SV=2	ACTN4	104.85	0	0	0	0	0	0
Biological Process	GO:0023051	3	regulation of signaling	1.29	0.000337386	O75460	Serine/threonine-protein kinase/endoribonuclease IRE1 OS=Homo sapiens OX=9606 GN=ERN1 PE=1 SV=2	ERN1	109.73	0.9	2	1	1	1	118360000
Biological Process	GO:0023051	3	regulation of signaling	1.29	0.000337386	P00441	Superoxide dismutase [Cu-Zn] OS=Homo sapiens OX=9606 GN=SOD1 PE=1 SV=2	SOD1	15.936	0	0	0	0	0	0
Biological Process	GO:0023051	3	regulation of signaling	1.29	0.000337386	P00533	Epidermal growth factor receptor OS=Homo sapiens OX=9606 GN=EGFR PE=1 SV=2	EGFR	134.28	0	0	0	0	0	0
Biological Process	GO:0023051	3	regulation of signaling	1.29	0.000337386	P00742	Coagulation factor X OS=Homo sapiens OX=9606 GN=F10 PE=1 SV=2	F10	54.731	0	0	0	0	0	0
Biological Process	GO:0023051	3	regulation of signaling	1.29	0.000337386	P00918	Carbonic anhydrase 2 OS=Homo sapiens OX=9606 GN=CA2 PE=1 SV=2	CA2	29.246	0	0	0	0	0	0
Biological Process	GO:0023051	3	regulation of signaling	1.29	0.000337386	P01019	Angiotensinogen OS=Homo sapiens OX=9606 GN=AGT PE=1 SV=3	AGT	53.154	7.6	3	3	3	3	91548000
Biological Process	GO:0023051	3	regulation of signaling	1.29	0.000337386	P01024	Complement C3 OS=Homo sapiens OX=9606 GN=C3 PE=1 SV=2	C3	187.15	0	0	0	0	0	0
Biological Process	GO:0023051	3	regulation of signaling	1.29	0.000337386	P01042	Kininogen-1 OS=Homo sapiens OX=9606 GN=KNG1 PE=1 SV=2	KNG1	71.957	16.8	10	9	9	9	1803300000
Biological Process	GO:0010758	6	regulation of macrophage chemotaxis	6.3	0.000333823	P07333	Macrophage colony-stimulating factor 1 receptor OS=Homo sapiens OX=9606 GN=CSF1R PE=1 SV=2	CSF1R	107.98	2.2	2	2	2	2	24589000
Biological Process	GO:0046470	4	phosphatidylcholine metabolic process	4.13	0.000325673	P06276	Cholinesterase OS=Homo sapiens OX=9606 GN=BCHE PE=1 SV=1	BCHE	68.417	5.1	2	2	2	2	90413000
Biological Process	GO:0010758	6	regulation of macrophage chemotaxis	6.3	0.000333823	P01024	Complement C3 OS=Homo sapiens OX=9606 GN=C3 PE=1 SV=2	C3	187.15	0	0	0	0	0	0
Biological Process	GO:0055076	8	transition metal ion homeostasis	3.26	0.000332991	P80188	Neutrophil gelatinase-associated lipocalin OS=Homo sapiens OX=9606 GN=LCN2 PE=1 SV=2	LCN2	22.588	0	0	0	0	0	0
Biological Process	GO:0046470	4	phosphatidylcholine metabolic process	4.13	0.000325673	P0C869	Cytosolic phospholipase A2 beta OS=Homo sapiens OX=9606 GN=PLA2G4B PE=1 SV=2	PLA2G4B	87.977	0	0	0	0	0	0
Biological Process	GO:0046470	4	phosphatidylcholine metabolic process	4.13	0.000325673	P80108	Phosphatidylinositol-glycan-specific phospholipase D OS=Homo sapiens OX=9606 GN=GPLD1 PE=1 SV=3	GPLD1	92.335	7.7	5	5	5	5	109680000
Biological Process	GO:0046470	4	phosphatidylcholine metabolic process	4.13	0.000325673	Q01469	Fatty acid-binding protein 5 OS=Homo sapiens OX=9606 GN=FABP5 PE=1 SV=3	FABP5	15.164	0	0	0	0	0	0
Biological Process	GO:0046470	4	phosphatidylcholine metabolic process	4.13	0.000325673	P11597	Cholesteryl ester transfer protein OS=Homo sapiens OX=9606 GN=CETP PE=1 SV=2	CETP	54.756	0	0	0	0	0	0
Biological Process	GO:0006090	7	pyruvate metabolic process	4.13	0.000325673	P00338	L-lactate dehydrogenase A chain OS=Homo sapiens OX=9606 GN=LDHA PE=1 SV=2	LDHA	36.688	0	0	0	0	0	0
Biological Process	GO:0006090	7	pyruvate metabolic process	4.13	0.000325673	P00558	Phosphoglycerate kinase 1 OS=Homo sapiens OX=9606 GN=PGK1 PE=1 SV=3	PGK1	44.614	0	0	0	0	0	0
Biological Process	GO:0006090	7	pyruvate metabolic process	4.13	0.000325673	P04075	Fructose-bisphosphate aldolase A OS=Homo sapiens OX=9606 GN=ALDOA PE=1 SV=2	ALDOA	39.42	4.9	1	1	1	1	12992000
Biological Process	GO:0006090	7	pyruvate metabolic process	4.13	0.000325673	P04406	Glyceraldehyde-3-phosphate dehydrogenase OS=Homo sapiens OX=9606 GN=GAPDH PE=1 SV=3	GAPDH	36.053	28.7	5	6	6	6	28325000
Biological Process	GO:0006090	7	pyruvate metabolic process	4.13	0.000325673	P06733	Alpha-enolase OS=Homo sapiens OX=9606 GN=ENO1 PE=1 SV=2	ENO1	47.168	4.4	1	1	1	1	3345600
Biological Process	GO:0006090	7	pyruvate metabolic process	4.13	0.000325673	P14618	Pyruvate kinase PKM OS=Homo sapiens OX=9606 GN=PKM PE=1 SV=4	PKM	57.936	0	0	0	0	0	0
Biological Process	GO:0006090	7	pyruvate metabolic process	4.13	0.000325673	P15259	Phosphoglycerate mutase 2 OS=Homo sapiens OX=9606 GN=PGAM2 PE=1 SV=3	PGAM2	28.766	0	0	0	0	0	0
Biological Process	GO:0006090	7	pyruvate metabolic process	4.13	0.000325673	P60174	Triosephosphate isomerase OS=Homo sapiens OX=9606 GN=TPI1 PE=1 SV=4	TPI1	26.669	0	0	0	0	0	0
Biological Process	GO:0006090	7	pyruvate metabolic process	4.13	0.000325673	P07738	Bisphosphoglycerate mutase OS=Homo sapiens OX=9606 GN=BPGM PE=1 SV=2	BPGM	30.005	0	0	0	0	0	0
Biological Process	GO:0055076	8	transition metal ion homeostasis	3.26	0.000332991	P00441	Superoxide dismutase [Cu-Zn] OS=Homo sapiens OX=9606 GN=SOD1 PE=1 SV=2	SOD1	15.936	0	0	0	0	0	0
Biological Process	GO:0055076	8	transition metal ion homeostasis	3.26	0.000332991	P00450	Ceruloplasmin OS=Homo sapiens OX=9606 GN=CP PE=1 SV=1	CP	122.2	22.9	25	17	17	17	892180000
Biological Process	GO:0055076	8	transition metal ion homeostasis	3.26	0.000332991	P02787	Serotransferrin OS=Homo sapiens OX=9606 GN=TF PE=1 SV=4	TF	77.049	60.5	160	43	43	43	50131000000
Biological Process	GO:0055076	8	transition metal ion homeostasis	3.26	0.000332991	P02788	Lactotransferrin OS=Homo sapiens OX=9606 GN=LTF PE=1 SV=6	LTF	78.181	16.3	11	9	9	9	133970000
Biological Process	GO:0055076	8	transition metal ion homeostasis	3.26	0.000332991	P02790	Hemopexin OS=Homo sapiens OX=9606 GN=HPX PE=1 SV=2	HPX	51.676	63	99	20	20	20	81563000000
Biological Process	GO:0055076	8	transition metal ion homeostasis	3.26	0.000332991	P05109	Protein S100-A8 OS=Homo sapiens OX=9606 GN=S100A8 PE=1 SV=1	S100A8	10.834	0	0	0	0	0	0
Biological Process	GO:0055076	8	transition metal ion homeostasis	3.26	0.000332991	P06702	Protein S100-A9 OS=Homo sapiens OX=9606 GN=S100A9 PE=1 SV=1	S100A9	13.242	43	4	3	3	3	31021000
Biological Process	GO:0055076	8	transition metal ion homeostasis	3.26	0.000332991	P09601	Heme oxygenase 1 OS=Homo sapiens OX=9606 GN=HMOX1 PE=1 SV=1	HMOX1	32.818	0	0	0	0	0	0
Biological Process	GO:0055076	8	transition metal ion homeostasis	3.26	0.000332991	P28676	Grancalcin OS=Homo sapiens OX=9606 GN=GCA PE=1 SV=2	GCA	24.01	0	0	0	0	0	0
Biological Process	GO:0055076	8	transition metal ion homeostasis	3.26	0.000332991	P42357	Histidine ammonia-lyase OS=Homo sapiens OX=9606 GN=HAL PE=1 SV=1	HAL	72.697	0	0	0	0	0	0
Biological Process	GO:0055076	8	transition metal ion homeostasis	3.26	0.000332991	P61769	Beta-2-microglobulin OS=Homo sapiens OX=9606 GN=B2M PE=1 SV=1	B2M	13.714	8.4	1	1	1	1	13665000
Biological Process	GO:1902531	5	regulation of intracellular signal transduction	1.44	0.000321499	P16070	CD44 antigen OS=Homo sapiens OX=9606 GN=CD44 PE=1 SV=3	CD44	81.537	3	2	2	2	2	118550000
Biological Process	GO:1902531	5	regulation of intracellular signal transduction	1.44	0.000321499	P14735	Insulin-degrading enzyme OS=Homo sapiens OX=9606 GN=IDE PE=1 SV=4	IDE	117.97	0	0	0	0	0	0
Biological Process	GO:1902531	5	regulation of intracellular signal transduction	1.44	0.000321499	P14174	Macrophage migration inhibitory factor OS=Homo sapiens OX=9606 GN=MIF PE=1 SV=4	MIF	12.476	0	0	0	0	0	0
Biological Process	GO:0050793	3	regulation of developmental process	1.33	0.00030891	Q9Y261	Hepatocyte nuclear factor 3-beta OS=Homo sapiens OX=9606 GN=FOXA2 PE=1 SV=1	FOXA2	48.306	0	0	0	0	0	0
Biological Process	GO:0050793	3	regulation of developmental process	1.33	0.00030891	Q9Y3M8	StAR-related lipid transfer protein 13 OS=Homo sapiens OX=9606 GN=STARD13 PE=1 SV=2	STARD13	124.97	0	0	0	0	0	0
Biological Process	GO:0050793	3	regulation of developmental process	1.33	0.00030891	O60282	Kinesin heavy chain isoform 5C OS=Homo sapiens OX=9606 GN=KIF5C PE=1 SV=1	KIF5C	109.49	0.8	9	1	1	1	2190000000
Biological Process	GO:0050793	3	regulation of developmental process	1.33	0.00030891	O75340	Programmed cell death protein 6 OS=Homo sapiens OX=9606 GN=PDCD6 PE=1 SV=1	PDCD6	21.868	0	0	0	0	0	0
Biological Process	GO:0050793	3	regulation of developmental process	1.33	0.00030891	O75553	Disabled homolog 1 OS=Homo sapiens OX=9606 GN=DAB1 PE=1 SV=3	DAB1	63.774	0	0	0	0	0	0
Biological Process	GO:0050793	3	regulation of developmental process	1.33	0.00030891	P01033	Metalloproteinase inhibitor 1 OS=Homo sapiens OX=9606 GN=TIMP1 PE=1 SV=1	TIMP1	23.171	12.1	1	2	2	2	17139000
Biological Process	GO:0050793	3	regulation of developmental process	1.33	0.00030891	P01034	Cystatin-C OS=Homo sapiens OX=9606 GN=CST3 PE=1 SV=1	CST3	15.799	23.3	3	3	3	3	14030000
Biological Process	GO:0050793	3	regulation of developmental process	1.33	0.00030891	P52566	Rho GDP-dissociation inhibitor 2 OS=Homo sapiens OX=9606 GN=ARHGDIB PE=1 SV=3	ARHGDIB	22.988	0	0	0	0	0	0
Biological Process	GO:0050793	3	regulation of developmental process	1.33	0.00030891	P61769	Beta-2-microglobulin OS=Homo sapiens OX=9606 GN=B2M PE=1 SV=1	B2M	13.714	8.4	1	1	1	1	13665000
Biological Process	GO:0050793	3	regulation of developmental process	1.33	0.00030891	Q02763	Angiopoietin-1 receptor OS=Homo sapiens OX=9606 GN=TEK PE=1 SV=2	TEK	125.83	0	0	0	0	0	0
Biological Process	GO:0050793	3	regulation of developmental process	1.33	0.00030891	Q07954	Prolow-density lipoprotein receptor-related protein 1 OS=Homo sapiens OX=9606 GN=LRP1 PE=1 SV=2	LRP1	504.6	0	0	0	0	0	0
Biological Process	GO:0050793	3	regulation of developmental process	1.33	0.00030891	Q13573	SNW domain-containing protein 1 OS=Homo sapiens OX=9606 GN=SNW1 PE=1 SV=1	SNW1	61.494	0	0	0	0	0	0
Biological Process	GO:0050793	3	regulation of developmental process	1.33	0.00030891	Q01628	Interferon-induced transmembrane protein 3 OS=Homo sapiens OX=9606 GN=IFITM3 PE=1 SV=2	IFITM3	14.632	0	0	0	0	0	0
Biological Process	GO:0050793	3	regulation of developmental process	1.33	0.00030891	P19022	Cadherin-2 OS=Homo sapiens OX=9606 GN=CDH2 PE=1 SV=4	CDH2	99.808	0	0	0	0	0	0
Biological Process	GO:0050793	3	regulation of developmental process	1.33	0.00030891	P98174	FYVE, RhoGEF and PH domain-containing protein 1 OS=Homo sapiens OX=9606 GN=FGD1 PE=1 SV=2	FGD1	106.56	0	0	0	0	0	0
Biological Process	GO:0050793	3	regulation of developmental process	1.33	0.00030891	Q01101	Insulinoma-associated protein 1 OS=Homo sapiens OX=9606 GN=INSM1 PE=1 SV=1	INSM1	52.923	0	0	0	0	0	0
Biological Process	GO:0050793	3	regulation of developmental process	1.33	0.00030891	Q15223	Nectin-1 OS=Homo sapiens OX=9606 GN=NECTIN1 PE=1 SV=3	NECTIN1	57.157	0	0	0	0	0	0
Biological Process	GO:0050793	3	regulation of developmental process	1.33	0.00030891	Q6IQ55	Tau-tubulin kinase 2 OS=Homo sapiens OX=9606 GN=TTBK2 PE=1 SV=2	TTBK2	137.41	1.1	1	1	1	1	0
Biological Process	GO:0050793	3	regulation of developmental process	1.33	0.00030891	P11597	Cholesteryl ester transfer protein OS=Homo sapiens OX=9606 GN=CETP PE=1 SV=2	CETP	54.756	0	0	0	0	0	0
Biological Process	GO:0050793	3	regulation of developmental process	1.33	0.00030891	Q9H4G4	Golgi-associated plant pathogenesis-related protein 1 OS=Homo sapiens OX=9606 GN=GLIPR2 PE=1 SV=3	GLIPR2	17.218	0	0	0	0	0	0
Biological Process	GO:0050793	3	regulation of developmental process	1.33	0.00030891	Q70JA7	Chondroitin sulfate synthase 3 OS=Homo sapiens OX=9606 GN=CHSY3 PE=2 SV=3	CHSY3	100.28	0	0	0	0	0	0
Biological Process	GO:0050793	3	regulation of developmental process	1.33	0.00030891	Q96QA5	Gasdermin-A OS=Homo sapiens OX=9606 GN=GSDMA PE=1 SV=4	GSDMA	49.364	0	0	0	0	0	0
Biological Process	GO:0050793	3	regulation of developmental process	1.33	0.00030891	O15409	Forkhead box protein P2 OS=Homo sapiens OX=9606 GN=FOXP2 PE=1 SV=2	FOXP2	79.918	1.5	1	1	1	1	0
Biological Process	GO:0050793	3	regulation of developmental process	1.33	0.00030891	Q9UIV8	Serpin B13 OS=Homo sapiens OX=9606 GN=SERPINB13 PE=1 SV=2	SERPINB13	44.276	0	0	0	0	0	0
Biological Process	GO:0050793	3	regulation of developmental process	1.33	0.00030891	P13646	Keratin, type I cytoskeletal 13 OS=Homo sapiens OX=9606 GN=KRT13 PE=1 SV=4	KRT13	49.588	6.6	1	2	1	1	681050
Biological Process	GO:0050793	3	regulation of developmental process	1.33	0.00030891	Q9NZH8	Interleukin-36 gamma OS=Homo sapiens OX=9606 GN=IL36G PE=1 SV=1	IL36G	18.721	10.7	1	1	1	1	0
Biological Process	GO:0050793	3	regulation of developmental process	1.33	0.00030891	Q9HD67	Unconventional myosin-X OS=Homo sapiens OX=9606 GN=MYO10 PE=1 SV=3	MYO10	237.34	0	0	0	0	0	0
Biological Process	GO:0050793	3	regulation of developmental process	1.33	0.00030891	Q05193	Dynamin-1 OS=Homo sapiens OX=9606 GN=DNM1 PE=1 SV=2	DNM1	97.407	0	0	0	0	0	0
Biological Process	GO:0050793	3	regulation of developmental process	1.33	0.00030891	P51659	Peroxisomal multifunctional enzyme type 2 OS=Homo sapiens OX=9606 GN=HSD17B4 PE=1 SV=3	HSD17B4	79.685	0	0	0	0	0	0
Biological Process	GO:0050793	3	regulation of developmental process	1.33	0.00030891	P51812	Ribosomal protein S6 kinase alpha-3 OS=Homo sapiens OX=9606 GN=RPS6KA3 PE=1 SV=1	RPS6KA3	83.735	1.2	1	1	1	1	0
Biological Process	GO:0050793	3	regulation of developmental process	1.33	0.00030891	P55072	Transitional endoplasmic reticulum ATPase OS=Homo sapiens OX=9606 GN=VCP PE=1 SV=4	VCP	89.321	0	0	0	0	0	0
Biological Process	GO:0050793	3	regulation of developmental process	1.33	0.00030891	P55786	Puromycin-sensitive aminopeptidase OS=Homo sapiens OX=9606 GN=NPEPPS PE=1 SV=2	NPEPPS	103.28	0	0	0	0	0	0
Biological Process	GO:0050793	3	regulation of developmental process	1.33	0.00030891	P61981	14-3-3 protein gamma OS=Homo sapiens OX=9606 GN=YWHAG PE=1 SV=2	YWHAG	28.302	0	0	0	0	0	0
Biological Process	GO:0050793	3	regulation of developmental process	1.33	0.00030891	P63244	Receptor of activated protein C kinase 1 OS=Homo sapiens OX=9606 GN=RACK1 PE=1 SV=3	RACK1	35.076	0	0	0	0	0	0
Biological Process	GO:0050793	3	regulation of developmental process	1.33	0.00030891	Q04695	Keratin, type I cytoskeletal 17 OS=Homo sapiens OX=9606 GN=KRT17 PE=1 SV=2	KRT17	48.105	32.6	5	10	5	5	28013000
Biological Process	GO:0050793	3	regulation of developmental process	1.33	0.00030891	Q05707	Collagen alpha-1(XIV) chain OS=Homo sapiens OX=9606 GN=COL14A1 PE=1 SV=3	COL14A1	193.51	0	0	0	0	0	0
Biological Process	GO:0050793	3	regulation of developmental process	1.33	0.00030891	Q12805	EGF-containing fibulin-like extracellular matrix protein 1 OS=Homo sapiens OX=9606 GN=EFEMP1 PE=1 SV=2	EFEMP1	54.64	0	0	0	0	0	0
Biological Process	GO:0050793	3	regulation of developmental process	1.33	0.00030891	Q13740	CD166 antigen OS=Homo sapiens OX=9606 GN=ALCAM PE=1 SV=2	ALCAM	65.102	11.1	4	4	4	4	34555000
Biological Process	GO:0050793	3	regulation of developmental process	1.33	0.00030891	Q15149	Plectin OS=Homo sapiens OX=9606 GN=PLEC PE=1 SV=3	PLEC	531.78	0	0	0	0	0	0
Biological Process	GO:0050793	3	regulation of developmental process	1.33	0.00030891	Q15517	Corneodesmosin OS=Homo sapiens OX=9606 GN=CDSN PE=1 SV=3	CDSN	51.522	6.4	4	2	2	2	21976000
Biological Process	GO:0050793	3	regulation of developmental process	1.33	0.00030891	Q15648	Mediator of RNA polymerase II transcription subunit 1 OS=Homo sapiens OX=9606 GN=MED1 PE=1 SV=4	MED1	168.48	0	0	0	0	0	0
Biological Process	GO:0050793	3	regulation of developmental process	1.33	0.00030891	Q6EMK4	Vasorin OS=Homo sapiens OX=9606 GN=VASN PE=1 SV=1	VASN	71.712	9.5	5	5	5	5	43527000
Biological Process	GO:0050793	3	regulation of developmental process	1.33	0.00030891	Q8N9W4	Golgin subfamily A member 6-like protein 2 OS=Homo sapiens OX=9606 GN=GOLGA6L2 PE=1 SV=3	GOLGA6L2	100.61	0	0	0	0	0	0
Biological Process	GO:0050793	3	regulation of developmental process	1.33	0.00030891	Q92876	Kallikrein-6 OS=Homo sapiens OX=9606 GN=KLK6 PE=1 SV=1	KLK6	26.855	0	0	0	0	0	0
Biological Process	GO:0050793	3	regulation of developmental process	1.33	0.00030891	Q969H8	Myeloid-derived growth factor OS=Homo sapiens OX=9606 GN=MYDGF PE=1 SV=1	MYDGF	18.795	0	0	0	0	0	0
Biological Process	GO:0050793	3	regulation of developmental process	1.33	0.00030891	Q96DZ9	CKLF-like MARVEL transmembrane domain-containing protein 5 OS=Homo sapiens OX=9606 GN=CMTM5 PE=1 SV=2	CMTM5	24.652	0	0	0	0	0	0
Biological Process	GO:0050793	3	regulation of developmental process	1.33	0.00030891	Q96IY4	Carboxypeptidase B2 OS=Homo sapiens OX=9606 GN=CPB2 PE=1 SV=2	CPB2	48.424	16.3	2	3	3	3	43281000
Biological Process	GO:0050793	3	regulation of developmental process	1.33	0.00030891	Q96K17	Transcription factor BTF3 homolog 4 OS=Homo sapiens OX=9606 GN=BTF3L4 PE=1 SV=1	BTF3L4	17.27	0	0	0	0	0	0
Biological Process	GO:0050793	3	regulation of developmental process	1.33	0.00030891	Q96P63	Serpin B12 OS=Homo sapiens OX=9606 GN=SERPINB12 PE=1 SV=1	SERPINB12	46.276	3	1	1	1	1	3836800
Biological Process	GO:0050793	3	regulation of developmental process	1.33	0.00030891	Q96PD5	N-acetylmuramoyl-L-alanine amidase OS=Homo sapiens OX=9606 GN=PGLYRP2 PE=1 SV=1	PGLYRP2	62.216	30.6	21	11	11	11	3810900000
Biological Process	GO:0050793	3	regulation of developmental process	1.33	0.00030891	Q9NPH3	Interleukin-1 receptor accessory protein OS=Homo sapiens OX=9606 GN=IL1RAP PE=1 SV=2	IL1RAP	65.418	5.3	2	2	2	2	10635000
Biological Process	GO:0050793	3	regulation of developmental process	1.33	0.00030891	Q13275	Semaphorin-3F OS=Homo sapiens OX=9606 GN=SEMA3F PE=2 SV=2	SEMA3F	88.38	2.7	1	1	1	1	0
Biological Process	GO:0050793	3	regulation of developmental process	1.33	0.00030891	Q8N1I0	Dedicator of cytokinesis protein 4 OS=Homo sapiens OX=9606 GN=DOCK4 PE=1 SV=3	DOCK4	225.2	0.5	1	1	1	1	0
Biological Process	GO:0050793	3	regulation of developmental process	1.33	0.00030891	Q9Y4C1	Lysine-specific demethylase 3A OS=Homo sapiens OX=9606 GN=KDM3A PE=1 SV=4	KDM3A	147.34	1	1	1	1	1	33437000
Biological Process	GO:1902531	5	regulation of intracellular signal transduction	1.44	0.000321499	P02760	Protein AMBP OS=Homo sapiens OX=9606 GN=AMBP PE=1 SV=1	AMBP	38.999	31	10	8	8	8	794190000
Biological Process	GO:1902531	5	regulation of intracellular signal transduction	1.44	0.000321499	P02787	Serotransferrin OS=Homo sapiens OX=9606 GN=TF PE=1 SV=4	TF	77.049	60.5	160	43	43	43	50131000000
Biological Process	GO:1902531	5	regulation of intracellular signal transduction	1.44	0.000321499	P02788	Lactotransferrin OS=Homo sapiens OX=9606 GN=LTF PE=1 SV=6	LTF	78.181	16.3	11	9	9	9	133970000
Biological Process	GO:1902531	5	regulation of intracellular signal transduction	1.44	0.000321499	P02790	Hemopexin OS=Homo sapiens OX=9606 GN=HPX PE=1 SV=2	HPX	51.676	63	99	20	20	20	81563000000
Biological Process	GO:1902531	5	regulation of intracellular signal transduction	1.44	0.000321499	P04040	Catalase OS=Homo sapiens OX=9606 GN=CAT PE=1 SV=3	CAT	59.755	8.7	2	2	2	2	7648000
Biological Process	GO:1902531	5	regulation of intracellular signal transduction	1.44	0.000321499	P04792	Heat shock protein beta-1 OS=Homo sapiens OX=9606 GN=HSPB1 PE=1 SV=2	HSPB1	22.782	7.8	1	1	1	1	1730200
Biological Process	GO:1902531	5	regulation of intracellular signal transduction	1.44	0.000321499	P05109	Protein S100-A8 OS=Homo sapiens OX=9606 GN=S100A8 PE=1 SV=1	S100A8	10.834	0	0	0	0	0	0
Biological Process	GO:1902531	5	regulation of intracellular signal transduction	1.44	0.000321499	P05362	Intercellular adhesion molecule 1 OS=Homo sapiens OX=9606 GN=ICAM1 PE=1 SV=2	ICAM1	57.825	0	0	0	0	0	0
Biological Process	GO:1902531	5	regulation of intracellular signal transduction	1.44	0.000321499	P05556	Integrin beta-1 OS=Homo sapiens OX=9606 GN=ITGB1 PE=1 SV=2	ITGB1	88.414	0	0	0	0	0	0
Biological Process	GO:1902531	5	regulation of intracellular signal transduction	1.44	0.000321499	P06702	Protein S100-A9 OS=Homo sapiens OX=9606 GN=S100A9 PE=1 SV=1	S100A9	13.242	43	4	3	3	3	31021000
Biological Process	GO:1902531	5	regulation of intracellular signal transduction	1.44	0.000321499	P06733	Alpha-enolase OS=Homo sapiens OX=9606 GN=ENO1 PE=1 SV=2	ENO1	47.168	4.4	1	1	1	1	3345600
Biological Process	GO:1902531	5	regulation of intracellular signal transduction	1.44	0.000321499	P07333	Macrophage colony-stimulating factor 1 receptor OS=Homo sapiens OX=9606 GN=CSF1R PE=1 SV=2	CSF1R	107.98	2.2	2	2	2	2	24589000
Biological Process	GO:1902531	5	regulation of intracellular signal transduction	1.44	0.000321499	P07359	Platelet glycoprotein Ib alpha chain OS=Homo sapiens OX=9606 GN=GP1BA PE=1 SV=2	GP1BA	71.539	0	0	0	0	0	0
Biological Process	GO:1902531	5	regulation of intracellular signal transduction	1.44	0.000321499	P07384	Calpain-1 catalytic subunit OS=Homo sapiens OX=9606 GN=CAPN1 PE=1 SV=1	CAPN1	81.889	0	0	0	0	0	0
Biological Process	GO:1902531	5	regulation of intracellular signal transduction	1.44	0.000321499	P08238	Heat shock protein HSP 90-beta OS=Homo sapiens OX=9606 GN=HSP90AB1 PE=1 SV=4	HSP90AB1	83.263	0	0	0	0	0	0
Biological Process	GO:1902531	5	regulation of intracellular signal transduction	1.44	0.000321499	P08571	Monocyte differentiation antigen CD14 OS=Homo sapiens OX=9606 GN=CD14 PE=1 SV=2	CD14	40.076	6.9	4	2	2	2	41719000
Biological Process	GO:1902531	5	regulation of intracellular signal transduction	1.44	0.000321499	P08697	Alpha-2-antiplasmin OS=Homo sapiens OX=9606 GN=SERPINF2 PE=1 SV=3	SERPINF2	54.565	17.9	7	6	6	6	283750000
Biological Process	GO:1902531	5	regulation of intracellular signal transduction	1.44	0.000321499	P09211	Glutathione S-transferase P OS=Homo sapiens OX=9606 GN=GSTP1 PE=1 SV=2	GSTP1	23.356	0	0	0	0	0	0
Biological Process	GO:1902531	5	regulation of intracellular signal transduction	1.44	0.000321499	P09619	Platelet-derived growth factor receptor beta OS=Homo sapiens OX=9606 GN=PDGFRB PE=1 SV=1	PDGFRB	123.97	2.9	3	2	2	2	4182400
Biological Process	GO:1902531	5	regulation of intracellular signal transduction	1.44	0.000321499	P0C0L5	Complement C4-B OS=Homo sapiens OX=9606 GN=C4B_2 PE=1 SV=2	C4B_2	192.75	2.9	4	3	3	3	50961000
Biological Process	GO:1902531	5	regulation of intracellular signal transduction	1.44	0.000321499	P62987	Ubiquitin-60S ribosomal protein L40 OS=Homo sapiens OX=9606 GN=UBA52 PE=1 SV=2	UBA52	14.728	39.1	7	6	6	6	90657000
Biological Process	GO:1902531	5	regulation of intracellular signal transduction	1.44	0.000321499	P0DMV9	Heat shock 70 kDa protein 1B OS=Homo sapiens OX=9606 GN=HSPA1B PE=1 SV=1	HSPA1B	70.051	0	0	0	0	0	0
Biological Process	GO:1902531	5	regulation of intracellular signal transduction	1.44	0.000321499	P10599	Thioredoxin OS=Homo sapiens OX=9606 GN=TXN PE=1 SV=3	TXN	11.737	0	0	0	0	0	0
Biological Process	GO:1902531	5	regulation of intracellular signal transduction	1.44	0.000321499	P02656	Apolipoprotein C-III OS=Homo sapiens OX=9606 GN=APOC3 PE=1 SV=1	APOC3	10.852	0	0	0	0	0	0
Biological Process	GO:1902531	5	regulation of intracellular signal transduction	1.44	0.000321499	P02647	Apolipoprotein A-I OS=Homo sapiens OX=9606 GN=APOA1 PE=1 SV=1	APOA1	30.777	20.6	5	5	5	5	76295000
Biological Process	GO:1902531	5	regulation of intracellular signal transduction	1.44	0.000321499	P01042	Kininogen-1 OS=Homo sapiens OX=9606 GN=KNG1 PE=1 SV=2	KNG1	71.957	16.8	10	9	9	9	1803300000
Biological Process	GO:1902531	5	regulation of intracellular signal transduction	1.44	0.000321499	P01024	Complement C3 OS=Homo sapiens OX=9606 GN=C3 PE=1 SV=2	C3	187.15	0	0	0	0	0	0
Biological Process	GO:0002262	2	myeloid cell homeostasis	3.28	0.000312729	P00441	Superoxide dismutase [Cu-Zn] OS=Homo sapiens OX=9606 GN=SOD1 PE=1 SV=2	SOD1	15.936	0	0	0	0	0	0
Biological Process	GO:0002262	2	myeloid cell homeostasis	3.28	0.000312729	P02042	Hemoglobin subunit delta OS=Homo sapiens OX=9606 GN=HBD PE=1 SV=2	HBD	16.055	41.5	2	6	1	1	26357000
Biological Process	GO:0002262	2	myeloid cell homeostasis	3.28	0.000312729	P04083	Annexin A1 OS=Homo sapiens OX=9606 GN=ANXA1 PE=1 SV=2	ANXA1	38.714	0	0	0	0	0	0
Biological Process	GO:0002262	2	myeloid cell homeostasis	3.28	0.000312729	P09601	Heme oxygenase 1 OS=Homo sapiens OX=9606 GN=HMOX1 PE=1 SV=1	HMOX1	32.818	0	0	0	0	0	0
Biological Process	GO:0002262	2	myeloid cell homeostasis	3.28	0.000312729	P30530	Tyrosine-protein kinase receptor UFO OS=Homo sapiens OX=9606 GN=AXL PE=1 SV=4	AXL	98.336	0	0	0	0	0	0
Biological Process	GO:0002262	2	myeloid cell homeostasis	3.28	0.000312729	P38646	Stress-70 protein, mitochondrial OS=Homo sapiens OX=9606 GN=HSPA9 PE=1 SV=2	HSPA9	73.68	0	0	0	0	0	0
Biological Process	GO:0002262	2	myeloid cell homeostasis	3.28	0.000312729	P68871	Hemoglobin subunit beta OS=Homo sapiens OX=9606 GN=HBB PE=1 SV=2	HBB	15.998	71.4	22	9	4	9	3143200000
Biological Process	GO:0002262	2	myeloid cell homeostasis	3.28	0.000312729	P69905	Hemoglobin subunit alpha OS=Homo sapiens OX=9606 GN=HBA2 PE=1 SV=2	HBA2	15.257	57.7	20	6	6	6	1898500000
Biological Process	GO:0002262	2	myeloid cell homeostasis	3.28	0.000312729	Q06830	Peroxiredoxin-1 OS=Homo sapiens OX=9606 GN=PRDX1 PE=1 SV=1	PRDX1	22.11	9	1	1	1	1	1860400
Biological Process	GO:0002262	2	myeloid cell homeostasis	3.28	0.000312729	Q15648	Mediator of RNA polymerase II transcription subunit 1 OS=Homo sapiens OX=9606 GN=MED1 PE=1 SV=4	MED1	168.48	0	0	0	0	0	0
Biological Process	GO:0002262	2	myeloid cell homeostasis	3.28	0.000312729	Q8IZF2	Adhesion G protein-coupled receptor F5 OS=Homo sapiens OX=9606 GN=ADGRF5 PE=1 SV=3	ADGRF5	149.46	0	0	0	0	0	0
Biological Process	GO:0050793	3	regulation of developmental process	1.33	0.00030891	P46939	Utrophin OS=Homo sapiens OX=9606 GN=UTRN PE=1 SV=2	UTRN	394.46	0.5	1	1	1	1	0
Biological Process	GO:0002262	2	myeloid cell homeostasis	3.28	0.000312729	P07738	Bisphosphoglycerate mutase OS=Homo sapiens OX=9606 GN=BPGM PE=1 SV=2	BPGM	30.005	0	0	0	0	0	0
Biological Process	GO:0003334	5	keratinocyte development	11.4	0.000318461	P31947	14-3-3 protein sigma OS=Homo sapiens OX=9606 GN=SFN PE=1 SV=1	SFN	27.774	0	0	0	0	0	0
Biological Process	GO:0003334	5	keratinocyte development	11.4	0.000318461	P35908	Keratin, type II cytoskeletal 2 epidermal OS=Homo sapiens OX=9606 GN=KRT2 PE=1 SV=2	KRT2	65.432	76.8	101	48	35	44	4005200000
Biological Process	GO:0003334	5	keratinocyte development	11.4	0.000318461	Q15517	Corneodesmosin OS=Homo sapiens OX=9606 GN=CDSN PE=1 SV=3	CDSN	51.522	6.4	4	2	2	2	21976000
Biological Process	GO:1902531	5	regulation of intracellular signal transduction	1.44	0.000321499	A8K2U0	Alpha-2-macroglobulin-like protein 1 OS=Homo sapiens OX=9606 GN=A2ML1 PE=1 SV=3	A2ML1	161.1	0	0	0	0	0	0
Biological Process	GO:1902531	5	regulation of intracellular signal transduction	1.44	0.000321499	O00327	Basic helix-loop-helix ARNT-like protein 1 OS=Homo sapiens OX=9606 GN=BMAL1 PE=1 SV=2	BMAL1	68.761	0	0	0	0	0	0
Biological Process	GO:1902531	5	regulation of intracellular signal transduction	1.44	0.000321499	O43707	Alpha-actinin-4 OS=Homo sapiens OX=9606 GN=ACTN4 PE=1 SV=2	ACTN4	104.85	0	0	0	0	0	0
Biological Process	GO:1902531	5	regulation of intracellular signal transduction	1.44	0.000321499	O75460	Serine/threonine-protein kinase/endoribonuclease IRE1 OS=Homo sapiens OX=9606 GN=ERN1 PE=1 SV=2	ERN1	109.73	0.9	2	1	1	1	118360000
Biological Process	GO:1902531	5	regulation of intracellular signal transduction	1.44	0.000321499	P00441	Superoxide dismutase [Cu-Zn] OS=Homo sapiens OX=9606 GN=SOD1 PE=1 SV=2	SOD1	15.936	0	0	0	0	0	0
Biological Process	GO:1902531	5	regulation of intracellular signal transduction	1.44	0.000321499	P00533	Epidermal growth factor receptor OS=Homo sapiens OX=9606 GN=EGFR PE=1 SV=2	EGFR	134.28	0	0	0	0	0	0
Biological Process	GO:1902531	5	regulation of intracellular signal transduction	1.44	0.000321499	P00742	Coagulation factor X OS=Homo sapiens OX=9606 GN=F10 PE=1 SV=2	F10	54.731	0	0	0	0	0	0
Biological Process	GO:1902531	5	regulation of intracellular signal transduction	1.44	0.000321499	P01019	Angiotensinogen OS=Homo sapiens OX=9606 GN=AGT PE=1 SV=3	AGT	53.154	7.6	3	3	3	3	91548000
Biological Process	GO:0003334	5	keratinocyte development	11.4	0.000318461	O75369	Filamin-B OS=Homo sapiens OX=9606 GN=FLNB PE=1 SV=2	FLNB	278.16	0	0	0	0	0	0
Biological Process	GO:0045918	5	negative regulation of cytolysis	12.28	0.000232046	P04259	Keratin, type II cytoskeletal 6B OS=Homo sapiens OX=9606 GN=KRT6B PE=1 SV=5	KRT6B	60.066	36.3	3	23	2	2	10185000
Biological Process	GO:0051851	4	modulation by host of symbiont process	3.66	0.000410095	P07355	Annexin A2 OS=Homo sapiens OX=9606 GN=ANXA2 PE=1 SV=2	ANXA2	38.604	15.3	4	4	4	4	8350100
Biological Process	GO:0051851	4	modulation by host of symbiont process	3.66	0.000410095	P11142	Heat shock cognate 71 kDa protein OS=Homo sapiens OX=9606 GN=HSPA8 PE=1 SV=1	HSPA8	70.897	0	0	0	0	0	0
Biological Process	GO:0009966	4	regulation of signal transduction	1.31	0.000596041	P05556	Integrin beta-1 OS=Homo sapiens OX=9606 GN=ITGB1 PE=1 SV=2	ITGB1	88.414	0	0	0	0	0	0
Biological Process	GO:0009966	4	regulation of signal transduction	1.31	0.000596041	P06396	Gelsolin OS=Homo sapiens OX=9606 GN=GSN PE=1 SV=1	GSN	85.696	0	0	0	0	0	0
Biological Process	GO:0009966	4	regulation of signal transduction	1.31	0.000596041	P06702	Protein S100-A9 OS=Homo sapiens OX=9606 GN=S100A9 PE=1 SV=1	S100A9	13.242	43	4	3	3	3	31021000
Biological Process	GO:0009966	4	regulation of signal transduction	1.31	0.000596041	P06733	Alpha-enolase OS=Homo sapiens OX=9606 GN=ENO1 PE=1 SV=2	ENO1	47.168	4.4	1	1	1	1	3345600
Biological Process	GO:0009966	4	regulation of signal transduction	1.31	0.000596041	P07333	Macrophage colony-stimulating factor 1 receptor OS=Homo sapiens OX=9606 GN=CSF1R PE=1 SV=2	CSF1R	107.98	2.2	2	2	2	2	24589000
Biological Process	GO:0009966	4	regulation of signal transduction	1.31	0.000596041	P07359	Platelet glycoprotein Ib alpha chain OS=Homo sapiens OX=9606 GN=GP1BA PE=1 SV=2	GP1BA	71.539	0	0	0	0	0	0
Biological Process	GO:0009966	4	regulation of signal transduction	1.31	0.000596041	P07384	Calpain-1 catalytic subunit OS=Homo sapiens OX=9606 GN=CAPN1 PE=1 SV=1	CAPN1	81.889	0	0	0	0	0	0
Biological Process	GO:0009966	4	regulation of signal transduction	1.31	0.000596041	P08238	Heat shock protein HSP 90-beta OS=Homo sapiens OX=9606 GN=HSP90AB1 PE=1 SV=4	HSP90AB1	83.263	0	0	0	0	0	0
Biological Process	GO:0009966	4	regulation of signal transduction	1.31	0.000596041	P08571	Monocyte differentiation antigen CD14 OS=Homo sapiens OX=9606 GN=CD14 PE=1 SV=2	CD14	40.076	6.9	4	2	2	2	41719000
Biological Process	GO:0009966	4	regulation of signal transduction	1.31	0.000596041	P08697	Alpha-2-antiplasmin OS=Homo sapiens OX=9606 GN=SERPINF2 PE=1 SV=3	SERPINF2	54.565	17.9	7	6	6	6	283750000
Biological Process	GO:0009966	4	regulation of signal transduction	1.31	0.000596041	P09211	Glutathione S-transferase P OS=Homo sapiens OX=9606 GN=GSTP1 PE=1 SV=2	GSTP1	23.356	0	0	0	0	0	0
Biological Process	GO:0009966	4	regulation of signal transduction	1.31	0.000596041	P09601	Heme oxygenase 1 OS=Homo sapiens OX=9606 GN=HMOX1 PE=1 SV=1	HMOX1	32.818	0	0	0	0	0	0
Biological Process	GO:0009966	4	regulation of signal transduction	1.31	0.000596041	P09619	Platelet-derived growth factor receptor beta OS=Homo sapiens OX=9606 GN=PDGFRB PE=1 SV=1	PDGFRB	123.97	2.9	3	2	2	2	4182400
Biological Process	GO:0009966	4	regulation of signal transduction	1.31	0.000596041	P0C0L5	Complement C4-B OS=Homo sapiens OX=9606 GN=C4B_2 PE=1 SV=2	C4B_2	192.75	2.9	4	3	3	3	50961000
Biological Process	GO:0009966	4	regulation of signal transduction	1.31	0.000596041	P62987	Ubiquitin-60S ribosomal protein L40 OS=Homo sapiens OX=9606 GN=UBA52 PE=1 SV=2	UBA52	14.728	39.1	7	6	6	6	90657000
Biological Process	GO:0009966	4	regulation of signal transduction	1.31	0.000596041	P0DMV9	Heat shock 70 kDa protein 1B OS=Homo sapiens OX=9606 GN=HSPA1B PE=1 SV=1	HSPA1B	70.051	0	0	0	0	0	0
Biological Process	GO:0009966	4	regulation of signal transduction	1.31	0.000596041	P10599	Thioredoxin OS=Homo sapiens OX=9606 GN=TXN PE=1 SV=3	TXN	11.737	0	0	0	0	0	0
Biological Process	GO:0009966	4	regulation of signal transduction	1.31	0.000596041	P11021	Endoplasmic reticulum chaperone BiP OS=Homo sapiens OX=9606 GN=HSPA5 PE=1 SV=2	HSPA5	72.332	0	0	0	0	0	0
Biological Process	GO:0009966	4	regulation of signal transduction	1.31	0.000596041	P11142	Heat shock cognate 71 kDa protein OS=Homo sapiens OX=9606 GN=HSPA8 PE=1 SV=1	HSPA8	70.897	0	0	0	0	0	0
Biological Process	GO:0009966	4	regulation of signal transduction	1.31	0.000596041	P12830	Cadherin-1 OS=Homo sapiens OX=9606 GN=CDH1 PE=1 SV=3	CDH1	97.455	1.8	2	2	2	2	7974000
Biological Process	GO:0009966	4	regulation of signal transduction	1.31	0.000596041	P14174	Macrophage migration inhibitory factor OS=Homo sapiens OX=9606 GN=MIF PE=1 SV=4	MIF	12.476	0	0	0	0	0	0
Biological Process	GO:0009966	4	regulation of signal transduction	1.31	0.000596041	P14735	Insulin-degrading enzyme OS=Homo sapiens OX=9606 GN=IDE PE=1 SV=4	IDE	117.97	0	0	0	0	0	0
Biological Process	GO:0009966	4	regulation of signal transduction	1.31	0.000596041	P14923	Junction plakoglobin OS=Homo sapiens OX=9606 GN=JUP PE=1 SV=3	JUP	81.744	7.2	3	3	3	3	11408000
Biological Process	GO:0009966	4	regulation of signal transduction	1.31	0.000596041	P05362	Intercellular adhesion molecule 1 OS=Homo sapiens OX=9606 GN=ICAM1 PE=1 SV=2	ICAM1	57.825	0	0	0	0	0	0
Biological Process	GO:0009966	4	regulation of signal transduction	1.31	0.000596041	P15291	Beta-1,4-galactosyltransferase 1 OS=Homo sapiens OX=9606 GN=B4GALT1 PE=1 SV=5	B4GALT1	43.92	0	0	0	0	0	0
Biological Process	GO:0009966	4	regulation of signal transduction	1.31	0.000596041	P05109	Protein S100-A8 OS=Homo sapiens OX=9606 GN=S100A8 PE=1 SV=1	S100A8	10.834	0	0	0	0	0	0
Biological Process	GO:0009966	4	regulation of signal transduction	1.31	0.000596041	P05089	Arginase-1 OS=Homo sapiens OX=9606 GN=ARG1 PE=1 SV=2	ARG1	34.735	8.4	5	3	3	3	32997000
Biological Process	GO:0042063	5	gliogenesis	2.32	0.000594995	P19022	Cadherin-2 OS=Homo sapiens OX=9606 GN=CDH2 PE=1 SV=4	CDH2	99.808	0	0	0	0	0	0
Biological Process	GO:0009966	4	regulation of signal transduction	1.31	0.000596041	A8K2U0	Alpha-2-macroglobulin-like protein 1 OS=Homo sapiens OX=9606 GN=A2ML1 PE=1 SV=3	A2ML1	161.1	0	0	0	0	0	0
Biological Process	GO:0009966	4	regulation of signal transduction	1.31	0.000596041	O00303	Eukaryotic translation initiation factor 3 subunit F OS=Homo sapiens OX=9606 GN=EIF3F PE=1 SV=1	EIF3F	37.563	0	0	0	0	0	0
Biological Process	GO:0009966	4	regulation of signal transduction	1.31	0.000596041	O00327	Basic helix-loop-helix ARNT-like protein 1 OS=Homo sapiens OX=9606 GN=BMAL1 PE=1 SV=2	BMAL1	68.761	0	0	0	0	0	0
Biological Process	GO:0009966	4	regulation of signal transduction	1.31	0.000596041	O15195	Villin-like protein OS=Homo sapiens OX=9606 GN=VILL PE=1 SV=3	VILL	95.906	3.4	2	2	2	2	17286000
Biological Process	GO:0009966	4	regulation of signal transduction	1.31	0.000596041	O43707	Alpha-actinin-4 OS=Homo sapiens OX=9606 GN=ACTN4 PE=1 SV=2	ACTN4	104.85	0	0	0	0	0	0
Biological Process	GO:0009966	4	regulation of signal transduction	1.31	0.000596041	O75460	Serine/threonine-protein kinase/endoribonuclease IRE1 OS=Homo sapiens OX=9606 GN=ERN1 PE=1 SV=2	ERN1	109.73	0.9	2	1	1	1	118360000
Biological Process	GO:0009966	4	regulation of signal transduction	1.31	0.000596041	P00441	Superoxide dismutase [Cu-Zn] OS=Homo sapiens OX=9606 GN=SOD1 PE=1 SV=2	SOD1	15.936	0	0	0	0	0	0
Biological Process	GO:0009966	4	regulation of signal transduction	1.31	0.000596041	P00533	Epidermal growth factor receptor OS=Homo sapiens OX=9606 GN=EGFR PE=1 SV=2	EGFR	134.28	0	0	0	0	0	0
Biological Process	GO:0009966	4	regulation of signal transduction	1.31	0.000596041	P00742	Coagulation factor X OS=Homo sapiens OX=9606 GN=F10 PE=1 SV=2	F10	54.731	0	0	0	0	0	0
Biological Process	GO:0009966	4	regulation of signal transduction	1.31	0.000596041	P01019	Angiotensinogen OS=Homo sapiens OX=9606 GN=AGT PE=1 SV=3	AGT	53.154	7.6	3	3	3	3	91548000
Biological Process	GO:0009966	4	regulation of signal transduction	1.31	0.000596041	P01024	Complement C3 OS=Homo sapiens OX=9606 GN=C3 PE=1 SV=2	C3	187.15	0	0	0	0	0	0
Biological Process	GO:0009966	4	regulation of signal transduction	1.31	0.000596041	P01042	Kininogen-1 OS=Homo sapiens OX=9606 GN=KNG1 PE=1 SV=2	KNG1	71.957	16.8	10	9	9	9	1803300000
Biological Process	GO:0009966	4	regulation of signal transduction	1.31	0.000596041	P02545	Prelamin-A/C OS=Homo sapiens OX=9606 GN=LMNA PE=1 SV=1	LMNA	74.139	0	0	0	0	0	0
Biological Process	GO:0009966	4	regulation of signal transduction	1.31	0.000596041	P02647	Apolipoprotein A-I OS=Homo sapiens OX=9606 GN=APOA1 PE=1 SV=1	APOA1	30.777	20.6	5	5	5	5	76295000
Biological Process	GO:0009966	4	regulation of signal transduction	1.31	0.000596041	P02656	Apolipoprotein C-III OS=Homo sapiens OX=9606 GN=APOC3 PE=1 SV=1	APOC3	10.852	0	0	0	0	0	0
Biological Process	GO:0009966	4	regulation of signal transduction	1.31	0.000596041	P02760	Protein AMBP OS=Homo sapiens OX=9606 GN=AMBP PE=1 SV=1	AMBP	38.999	31	10	8	8	8	794190000
Biological Process	GO:0009966	4	regulation of signal transduction	1.31	0.000596041	P02765	Alpha-2-HS-glycoprotein OS=Homo sapiens OX=9606 GN=AHSG PE=1 SV=2	AHSG	39.34	23.2	41	7	7	7	4512000000
Biological Process	GO:0009966	4	regulation of signal transduction	1.31	0.000596041	P02787	Serotransferrin OS=Homo sapiens OX=9606 GN=TF PE=1 SV=4	TF	77.049	60.5	160	43	43	43	50131000000
Biological Process	GO:0009966	4	regulation of signal transduction	1.31	0.000596041	P02788	Lactotransferrin OS=Homo sapiens OX=9606 GN=LTF PE=1 SV=6	LTF	78.181	16.3	11	9	9	9	133970000
Biological Process	GO:0009966	4	regulation of signal transduction	1.31	0.000596041	P02790	Hemopexin OS=Homo sapiens OX=9606 GN=HPX PE=1 SV=2	HPX	51.676	63	99	20	20	20	81563000000
Biological Process	GO:0009966	4	regulation of signal transduction	1.31	0.000596041	P04040	Catalase OS=Homo sapiens OX=9606 GN=CAT PE=1 SV=3	CAT	59.755	8.7	2	2	2	2	7648000
Biological Process	GO:0009966	4	regulation of signal transduction	1.31	0.000596041	P04792	Heat shock protein beta-1 OS=Homo sapiens OX=9606 GN=HSPB1 PE=1 SV=2	HSPB1	22.782	7.8	1	1	1	1	1730200
Biological Process	GO:0009966	4	regulation of signal transduction	1.31	0.000596041	P05090	Apolipoprotein D OS=Homo sapiens OX=9606 GN=APOD PE=1 SV=1	APOD	21.275	25.9	14	4	4	4	463060000
Biological Process	GO:0042063	5	gliogenesis	2.32	0.000594995	Q07954	Prolow-density lipoprotein receptor-related protein 1 OS=Homo sapiens OX=9606 GN=LRP1 PE=1 SV=2	LRP1	504.6	0	0	0	0	0	0
Biological Process	GO:0009966	4	regulation of signal transduction	1.31	0.000596041	P15309	Prostatic acid phosphatase OS=Homo sapiens OX=9606 GN=ACP3 PE=1 SV=3	ACP3	44.566	0	0	0	0	0	0
Biological Process	GO:0009966	4	regulation of signal transduction	1.31	0.000596041	P16885	1-phosphatidylinositol 4,5-bisphosphate phosphodiesterase gamma-2 OS=Homo sapiens OX=9606 GN=PLCG2 PE=1 SV=4	PLCG2	147.87	0	0	0	0	0	0
Biological Process	GO:0009966	4	regulation of signal transduction	1.31	0.000596041	P53634	Dipeptidyl peptidase 1 OS=Homo sapiens OX=9606 GN=CTSC PE=1 SV=2	CTSC	51.853	0	0	0	0	0	0
Biological Process	GO:0009966	4	regulation of signal transduction	1.31	0.000596041	P55072	Transitional endoplasmic reticulum ATPase OS=Homo sapiens OX=9606 GN=VCP PE=1 SV=4	VCP	89.321	0	0	0	0	0	0
Biological Process	GO:0009966	4	regulation of signal transduction	1.31	0.000596041	P61981	14-3-3 protein gamma OS=Homo sapiens OX=9606 GN=YWHAG PE=1 SV=2	YWHAG	28.302	0	0	0	0	0	0
Biological Process	GO:0009966	4	regulation of signal transduction	1.31	0.000596041	P62081	40S ribosomal protein S7 OS=Homo sapiens OX=9606 GN=RPS7 PE=1 SV=1	RPS7	22.127	0	0	0	0	0	0
Biological Process	GO:0009966	4	regulation of signal transduction	1.31	0.000596041	P62258	14-3-3 protein epsilon OS=Homo sapiens OX=9606 GN=YWHAE PE=1 SV=1	YWHAE	29.174	0	0	0	0	0	0
Biological Process	GO:0009966	4	regulation of signal transduction	1.31	0.000596041	P63104	14-3-3 protein zeta/delta OS=Homo sapiens OX=9606 GN=YWHAZ PE=1 SV=1	YWHAZ	27.745	0	0	0	0	0	0
Biological Process	GO:0009966	4	regulation of signal transduction	1.31	0.000596041	P63244	Receptor of activated protein C kinase 1 OS=Homo sapiens OX=9606 GN=RACK1 PE=1 SV=3	RACK1	35.076	0	0	0	0	0	0
Biological Process	GO:0009966	4	regulation of signal transduction	1.31	0.000596041	P78417	Glutathione S-transferase omega-1 OS=Homo sapiens OX=9606 GN=GSTO1 PE=1 SV=2	GSTO1	27.566	0	0	0	0	0	0
Biological Process	GO:0009966	4	regulation of signal transduction	1.31	0.000596041	P80511	Protein S100-A12 OS=Homo sapiens OX=9606 GN=S100A12 PE=1 SV=2	S100A12	10.575	0	0	0	0	0	0
Biological Process	GO:0009966	4	regulation of signal transduction	1.31	0.000596041	Q01469	Fatty acid-binding protein 5 OS=Homo sapiens OX=9606 GN=FABP5 PE=1 SV=3	FABP5	15.164	0	0	0	0	0	0
Biological Process	GO:0009966	4	regulation of signal transduction	1.31	0.000596041	Q06830	Peroxiredoxin-1 OS=Homo sapiens OX=9606 GN=PRDX1 PE=1 SV=1	PRDX1	22.11	9	1	1	1	1	1860400
Biological Process	GO:0009966	4	regulation of signal transduction	1.31	0.000596041	Q10588	ADP-ribosyl cyclase/cyclic ADP-ribose hydrolase 2 OS=Homo sapiens OX=9606 GN=BST1 PE=1 SV=2	BST1	35.724	7.9	2	2	2	2	26770000
Biological Process	GO:0009966	4	regulation of signal transduction	1.31	0.000596041	Q12913	Receptor-type tyrosine-protein phosphatase eta OS=Homo sapiens OX=9606 GN=PTPRJ PE=1 SV=3	PTPRJ	145.94	2.7	3	3	3	3	26199000
Biological Process	GO:0009966	4	regulation of signal transduction	1.31	0.000596041	Q15149	Plectin OS=Homo sapiens OX=9606 GN=PLEC PE=1 SV=3	PLEC	531.78	0	0	0	0	0	0
Biological Process	GO:0009966	4	regulation of signal transduction	1.31	0.000596041	Q15648	Mediator of RNA polymerase II transcription subunit 1 OS=Homo sapiens OX=9606 GN=MED1 PE=1 SV=4	MED1	168.48	0	0	0	0	0	0
Biological Process	GO:0009966	4	regulation of signal transduction	1.31	0.000596041	Q66K66	Transmembrane protein 198 OS=Homo sapiens OX=9606 GN=TMEM198 PE=1 SV=1	TMEM198	39.474	2.5	8	2	2	2	3627900000
Biological Process	GO:0009966	4	regulation of signal transduction	1.31	0.000596041	Q6EMK4	Vasorin OS=Homo sapiens OX=9606 GN=VASN PE=1 SV=1	VASN	71.712	9.5	5	5	5	5	43527000
Biological Process	GO:0009966	4	regulation of signal transduction	1.31	0.000596041	Q86SG5	Protein S100-A7A OS=Homo sapiens OX=9606 GN=S100A7A PE=1 SV=3	S100A7A	11.305	0	0	0	0	0	0
Biological Process	GO:0009966	4	regulation of signal transduction	1.31	0.000596041	Q8NEV4	Myosin-IIIa OS=Homo sapiens OX=9606 GN=MYO3A PE=1 SV=2	MYO3A	186.21	0	0	0	0	0	0
Biological Process	GO:0009966	4	regulation of signal transduction	1.31	0.000596041	Q8TDY2	RB1-inducible coiled-coil protein 1 OS=Homo sapiens OX=9606 GN=RB1CC1 PE=1 SV=3	RB1CC1	183.09	0	0	0	0	0	0
Biological Process	GO:0009966	4	regulation of signal transduction	1.31	0.000596041	Q92876	Kallikrein-6 OS=Homo sapiens OX=9606 GN=KLK6 PE=1 SV=1	KLK6	26.855	0	0	0	0	0	0
Biological Process	GO:0009966	4	regulation of signal transduction	1.31	0.000596041	Q969H8	Myeloid-derived growth factor OS=Homo sapiens OX=9606 GN=MYDGF PE=1 SV=1	MYDGF	18.795	0	0	0	0	0	0
Biological Process	GO:0009966	4	regulation of signal transduction	1.31	0.000596041	Q96EP0	E3 ubiquitin-protein ligase RNF31 OS=Homo sapiens OX=9606 GN=RNF31 PE=1 SV=1	RNF31	119.65	0	0	0	0	0	0
Biological Process	GO:0009966	4	regulation of signal transduction	1.31	0.000596041	P52907	F-actin-capping protein subunit alpha-1 OS=Homo sapiens OX=9606 GN=CAPZA1 PE=1 SV=3	CAPZA1	32.922	0	0	0	0	0	0
Biological Process	GO:0009966	4	regulation of signal transduction	1.31	0.000596041	P16070	CD44 antigen OS=Homo sapiens OX=9606 GN=CD44 PE=1 SV=3	CD44	81.537	3	2	2	2	2	118550000
Biological Process	GO:0009966	4	regulation of signal transduction	1.31	0.000596041	P51812	Ribosomal protein S6 kinase alpha-3 OS=Homo sapiens OX=9606 GN=RPS6KA3 PE=1 SV=1	RPS6KA3	83.735	1.2	1	1	1	1	0
Biological Process	GO:0009966	4	regulation of signal transduction	1.31	0.000596041	P50395	Rab GDP dissociation inhibitor beta OS=Homo sapiens OX=9606 GN=GDI2 PE=1 SV=2	GDI2	50.663	0	0	0	0	0	0
Biological Process	GO:0009966	4	regulation of signal transduction	1.31	0.000596041	P17174	Aspartate aminotransferase, cytoplasmic OS=Homo sapiens OX=9606 GN=GOT1 PE=1 SV=3	GOT1	46.247	3.6	1	1	1	1	3070800
Biological Process	GO:0009966	4	regulation of signal transduction	1.31	0.000596041	P17813	Endoglin OS=Homo sapiens OX=9606 GN=ENG PE=1 SV=2	ENG	70.577	0	0	0	0	0	0
Biological Process	GO:0009966	4	regulation of signal transduction	1.31	0.000596041	P17931	Galectin-3 OS=Homo sapiens OX=9606 GN=LGALS3 PE=1 SV=5	LGALS3	26.152	0	0	0	0	0	0
Biological Process	GO:0009966	4	regulation of signal transduction	1.31	0.000596041	P18510	Interleukin-1 receptor antagonist protein OS=Homo sapiens OX=9606 GN=IL1RN PE=1 SV=1	IL1RN	20.055	0	0	0	0	0	0
Biological Process	GO:0009966	4	regulation of signal transduction	1.31	0.000596041	P19784	Casein kinase II subunit alpha' OS=Homo sapiens OX=9606 GN=CSNK2A2 PE=1 SV=1	CSNK2A2	41.213	0	0	0	0	0	0
Biological Process	GO:0009966	4	regulation of signal transduction	1.31	0.000596041	P21333	Filamin-A OS=Homo sapiens OX=9606 GN=FLNA PE=1 SV=4	FLNA	280.74	0	0	0	0	0	0
Biological Process	GO:0009966	4	regulation of signal transduction	1.31	0.000596041	P28676	Grancalcin OS=Homo sapiens OX=9606 GN=GCA PE=1 SV=2	GCA	24.01	0	0	0	0	0	0
Biological Process	GO:0009966	4	regulation of signal transduction	1.31	0.000596041	P29508	Serpin B3 OS=Homo sapiens OX=9606 GN=SERPINB3 PE=1 SV=2	SERPINB3	44.564	0	0	0	0	0	0
Biological Process	GO:0009966	4	regulation of signal transduction	1.31	0.000596041	P30086	Phosphatidylethanolamine-binding protein 1 OS=Homo sapiens OX=9606 GN=PEBP1 PE=1 SV=3	PEBP1	21.057	0	0	0	0	0	0
Biological Process	GO:0009966	4	regulation of signal transduction	1.31	0.000596041	P30101	Protein disulfide-isomerase A3 OS=Homo sapiens OX=9606 GN=PDIA3 PE=1 SV=4	PDIA3	56.782	0	0	0	0	0	0
Biological Process	GO:0009966	4	regulation of signal transduction	1.31	0.000596041	P30530	Tyrosine-protein kinase receptor UFO OS=Homo sapiens OX=9606 GN=AXL PE=1 SV=4	AXL	98.336	0	0	0	0	0	0
Biological Process	GO:0009966	4	regulation of signal transduction	1.31	0.000596041	P30740	Leukocyte elastase inhibitor OS=Homo sapiens OX=9606 GN=SERPINB1 PE=1 SV=1	SERPINB1	42.741	0	0	0	0	0	0
Biological Process	GO:0009966	4	regulation of signal transduction	1.31	0.000596041	P31151	Protein S100-A7 OS=Homo sapiens OX=9606 GN=S100A7 PE=1 SV=4	S100A7	11.471	14.9	5	3	3	3	18159000
Biological Process	GO:0009966	4	regulation of signal transduction	1.31	0.000596041	P31947	14-3-3 protein sigma OS=Homo sapiens OX=9606 GN=SFN PE=1 SV=1	SFN	27.774	0	0	0	0	0	0
Biological Process	GO:0009966	4	regulation of signal transduction	1.31	0.000596041	P32119	Peroxiredoxin-2 OS=Homo sapiens OX=9606 GN=PRDX2 PE=1 SV=5	PRDX2	21.892	0	0	0	0	0	0
Biological Process	GO:0009966	4	regulation of signal transduction	1.31	0.000596041	P35232	Prohibitin 1 OS=Homo sapiens OX=9606 GN=PHB1 PE=1 SV=1	PHB1	29.804	0	0	0	0	0	0
Biological Process	GO:0009966	4	regulation of signal transduction	1.31	0.000596041	P35542	Serum amyloid A-4 protein OS=Homo sapiens OX=9606 GN=SAA4 PE=1 SV=2	SAA4	14.746	20	2	2	2	2	19153000
Biological Process	GO:0009966	4	regulation of signal transduction	1.31	0.000596041	P35579	Myosin-9 OS=Homo sapiens OX=9606 GN=MYH9 PE=1 SV=4	MYH9	226.53	1.8	2	2	2	2	2939500
Biological Process	GO:0009966	4	regulation of signal transduction	1.31	0.000596041	P42224	Signal transducer and activator of transcription 1-alpha/beta OS=Homo sapiens OX=9606 GN=STAT1 PE=1 SV=2	STAT1	87.334	0	0	0	0	0	0
Biological Process	GO:0009966	4	regulation of signal transduction	1.31	0.000596041	P43490	Nicotinamide phosphoribosyltransferase OS=Homo sapiens OX=9606 GN=NAMPT PE=1 SV=1	NAMPT	55.52	0	0	0	0	0	0
Biological Process	GO:0009966	4	regulation of signal transduction	1.31	0.000596041	P46939	Utrophin OS=Homo sapiens OX=9606 GN=UTRN PE=1 SV=2	UTRN	394.46	0.5	1	1	1	1	0
Biological Process	GO:0009966	4	regulation of signal transduction	1.31	0.000596041	P47756	F-actin-capping protein subunit beta OS=Homo sapiens OX=9606 GN=CAPZB PE=1 SV=5	CAPZB	30.628	0	0	0	0	0	0
Biological Process	GO:0009966	4	regulation of signal transduction	1.31	0.000596041	P49662	Caspase-4 OS=Homo sapiens OX=9606 GN=CASP4 PE=1 SV=1	CASP4	43.262	4	6	1	1	1	29842000
Biological Process	GO:0009966	4	regulation of signal transduction	1.31	0.000596041	Q05193	Dynamin-1 OS=Homo sapiens OX=9606 GN=DNM1 PE=1 SV=2	DNM1	97.407	0	0	0	0	0	0
Biological Process	GO:0009966	4	regulation of signal transduction	1.31	0.000596041	Q96P63	Serpin B12 OS=Homo sapiens OX=9606 GN=SERPINB12 PE=1 SV=1	SERPINB12	46.276	3	1	1	1	1	3836800
Biological Process	GO:0042063	5	gliogenesis	2.32	0.000594995	O75553	Disabled homolog 1 OS=Homo sapiens OX=9606 GN=DAB1 PE=1 SV=3	DAB1	63.774	0	0	0	0	0	0
Biological Process	GO:0042063	5	gliogenesis	2.32	0.000594995	Q9BXM0	Periaxin OS=Homo sapiens OX=9606 GN=PRX PE=1 SV=2	PRX	154.9	0	0	0	0	0	0
Biological Process	GO:0034097	4	response to cytokine	1.59	0.0005847	P04792	Heat shock protein beta-1 OS=Homo sapiens OX=9606 GN=HSPB1 PE=1 SV=2	HSPB1	22.782	7.8	1	1	1	1	1730200
Biological Process	GO:0034097	4	response to cytokine	1.59	0.0005847	P05089	Arginase-1 OS=Homo sapiens OX=9606 GN=ARG1 PE=1 SV=2	ARG1	34.735	8.4	5	3	3	3	32997000
Biological Process	GO:0034097	4	response to cytokine	1.59	0.0005847	P05120	Plasminogen activator inhibitor 2 OS=Homo sapiens OX=9606 GN=SERPINB2 PE=1 SV=2	SERPINB2	46.596	0	0	0	0	0	0
Biological Process	GO:0034097	4	response to cytokine	1.59	0.0005847	P05362	Intercellular adhesion molecule 1 OS=Homo sapiens OX=9606 GN=ICAM1 PE=1 SV=2	ICAM1	57.825	0	0	0	0	0	0
Biological Process	GO:0034097	4	response to cytokine	1.59	0.0005847	P05556	Integrin beta-1 OS=Homo sapiens OX=9606 GN=ITGB1 PE=1 SV=2	ITGB1	88.414	0	0	0	0	0	0
Biological Process	GO:0034097	4	response to cytokine	1.59	0.0005847	P06396	Gelsolin OS=Homo sapiens OX=9606 GN=GSN PE=1 SV=1	GSN	85.696	0	0	0	0	0	0
Biological Process	GO:0034097	4	response to cytokine	1.59	0.0005847	P07333	Macrophage colony-stimulating factor 1 receptor OS=Homo sapiens OX=9606 GN=CSF1R PE=1 SV=2	CSF1R	107.98	2.2	2	2	2	2	24589000
Biological Process	GO:0034097	4	response to cytokine	1.59	0.0005847	P07355	Annexin A2 OS=Homo sapiens OX=9606 GN=ANXA2 PE=1 SV=2	ANXA2	38.604	15.3	4	4	4	4	8350100
Biological Process	GO:0034097	4	response to cytokine	1.59	0.0005847	P07359	Platelet glycoprotein Ib alpha chain OS=Homo sapiens OX=9606 GN=GP1BA PE=1 SV=2	GP1BA	71.539	0	0	0	0	0	0
Biological Process	GO:0034097	4	response to cytokine	1.59	0.0005847	P08238	Heat shock protein HSP 90-beta OS=Homo sapiens OX=9606 GN=HSP90AB1 PE=1 SV=4	HSP90AB1	83.263	0	0	0	0	0	0
Biological Process	GO:0034097	4	response to cytokine	1.59	0.0005847	P08571	Monocyte differentiation antigen CD14 OS=Homo sapiens OX=9606 GN=CD14 PE=1 SV=2	CD14	40.076	6.9	4	2	2	2	41719000
Biological Process	GO:0034097	4	response to cytokine	1.59	0.0005847	P08670	Vimentin OS=Homo sapiens OX=9606 GN=VIM PE=1 SV=4	VIM	53.651	0	0	0	0	0	0
Biological Process	GO:0034097	4	response to cytokine	1.59	0.0005847	P09601	Heme oxygenase 1 OS=Homo sapiens OX=9606 GN=HMOX1 PE=1 SV=1	HMOX1	32.818	0	0	0	0	0	0
Biological Process	GO:0034097	4	response to cytokine	1.59	0.0005847	P62987	Ubiquitin-60S ribosomal protein L40 OS=Homo sapiens OX=9606 GN=UBA52 PE=1 SV=2	UBA52	14.728	39.1	7	6	6	6	90657000
Biological Process	GO:0034097	4	response to cytokine	1.59	0.0005847	P11021	Endoplasmic reticulum chaperone BiP OS=Homo sapiens OX=9606 GN=HSPA5 PE=1 SV=2	HSPA5	72.332	0	0	0	0	0	0
Biological Process	GO:0034097	4	response to cytokine	1.59	0.0005847	P11142	Heat shock cognate 71 kDa protein OS=Homo sapiens OX=9606 GN=HSPA8 PE=1 SV=1	HSPA8	70.897	0	0	0	0	0	0
Biological Process	GO:0034097	4	response to cytokine	1.59	0.0005847	P14174	Macrophage migration inhibitory factor OS=Homo sapiens OX=9606 GN=MIF PE=1 SV=4	MIF	12.476	0	0	0	0	0	0
Biological Process	GO:0034097	4	response to cytokine	1.59	0.0005847	P16070	CD44 antigen OS=Homo sapiens OX=9606 GN=CD44 PE=1 SV=3	CD44	81.537	3	2	2	2	2	118550000
Biological Process	GO:0034097	4	response to cytokine	1.59	0.0005847	P18510	Interleukin-1 receptor antagonist protein OS=Homo sapiens OX=9606 GN=IL1RN PE=1 SV=1	IL1RN	20.055	0	0	0	0	0	0
Biological Process	GO:0034097	4	response to cytokine	1.59	0.0005847	P22735	Protein-glutamine gamma-glutamyltransferase K OS=Homo sapiens OX=9606 GN=TGM1 PE=1 SV=4	TGM1	89.786	3.3	2	2	2	2	11308000
Biological Process	GO:0034097	4	response to cytokine	1.59	0.0005847	P23470	Receptor-type tyrosine-protein phosphatase gamma OS=Homo sapiens OX=9606 GN=PTPRG PE=1 SV=4	PTPRG	162	1	1	1	1	1	5890900
Biological Process	GO:0034097	4	response to cytokine	1.59	0.0005847	P26992	Ciliary neurotrophic factor receptor subunit alpha OS=Homo sapiens OX=9606 GN=CNTFR PE=1 SV=2	CNTFR	40.633	3.5	1	1	1	1	4217500
Biological Process	GO:0034097	4	response to cytokine	1.59	0.0005847	P30530	Tyrosine-protein kinase receptor UFO OS=Homo sapiens OX=9606 GN=AXL PE=1 SV=4	AXL	98.336	0	0	0	0	0	0
Biological Process	GO:0034097	4	response to cytokine	1.59	0.0005847	P04406	Glyceraldehyde-3-phosphate dehydrogenase OS=Homo sapiens OX=9606 GN=GAPDH PE=1 SV=3	GAPDH	36.053	28.7	5	6	6	6	28325000
Biological Process	GO:0034097	4	response to cytokine	1.59	0.0005847	P35232	Prohibitin 1 OS=Homo sapiens OX=9606 GN=PHB1 PE=1 SV=1	PHB1	29.804	0	0	0	0	0	0
Biological Process	GO:0034097	4	response to cytokine	1.59	0.0005847	P04083	Annexin A1 OS=Homo sapiens OX=9606 GN=ANXA1 PE=1 SV=2	ANXA1	38.714	0	0	0	0	0	0
Biological Process	GO:0034097	4	response to cytokine	1.59	0.0005847	P01009	Alpha-1-antitrypsin OS=Homo sapiens OX=9606 GN=SERPINA1 PE=1 SV=3	SERPINA1	46.736	38.3	20	13	13	13	1081600000
Biological Process	GO:1903532	5	positive regulation of secretion by cell	1.93	0.000584623	P0C0L5	Complement C4-B OS=Homo sapiens OX=9606 GN=C4B_2 PE=1 SV=2	C4B_2	192.75	2.9	4	3	3	3	50961000
Biological Process	GO:1903532	5	positive regulation of secretion by cell	1.93	0.000584623	P10809	60 kDa heat shock protein, mitochondrial OS=Homo sapiens OX=9606 GN=HSPD1 PE=1 SV=2	HSPD1	61.054	0	0	0	0	0	0
Biological Process	GO:1903532	5	positive regulation of secretion by cell	1.93	0.000584623	P14174	Macrophage migration inhibitory factor OS=Homo sapiens OX=9606 GN=MIF PE=1 SV=4	MIF	12.476	0	0	0	0	0	0
Biological Process	GO:1903532	5	positive regulation of secretion by cell	1.93	0.000584623	P15104	Glutamine synthetase OS=Homo sapiens OX=9606 GN=GLUL PE=1 SV=4	GLUL	42.064	0	0	0	0	0	0
Biological Process	GO:1903532	5	positive regulation of secretion by cell	1.93	0.000584623	P17931	Galectin-3 OS=Homo sapiens OX=9606 GN=LGALS3 PE=1 SV=5	LGALS3	26.152	0	0	0	0	0	0
Biological Process	GO:1903532	5	positive regulation of secretion by cell	1.93	0.000584623	P19652	Alpha-1-acid glycoprotein 2 OS=Homo sapiens OX=9606 GN=ORM2 PE=1 SV=2	ORM2	23.602	34.8	25	8	6	8	4912700000
Biological Process	GO:1903532	5	positive regulation of secretion by cell	1.93	0.000584623	P29508	Serpin B3 OS=Homo sapiens OX=9606 GN=SERPINB3 PE=1 SV=2	SERPINB3	44.564	0	0	0	0	0	0
Biological Process	GO:1903532	5	positive regulation of secretion by cell	1.93	0.000584623	P30740	Leukocyte elastase inhibitor OS=Homo sapiens OX=9606 GN=SERPINB1 PE=1 SV=1	SERPINB1	42.741	0	0	0	0	0	0
Biological Process	GO:1903532	5	positive regulation of secretion by cell	1.93	0.000584623	P35579	Myosin-9 OS=Homo sapiens OX=9606 GN=MYH9 PE=1 SV=4	MYH9	226.53	1.8	2	2	2	2	2939500
Biological Process	GO:1903532	5	positive regulation of secretion by cell	1.93	0.000584623	P49662	Caspase-4 OS=Homo sapiens OX=9606 GN=CASP4 PE=1 SV=1	CASP4	43.262	4	6	1	1	1	29842000
Biological Process	GO:1903532	5	positive regulation of secretion by cell	1.93	0.000584623	P62937	Peptidyl-prolyl cis-trans isomerase A OS=Homo sapiens OX=9606 GN=PPIA PE=1 SV=2	PPIA	18.012	0	0	0	0	0	0
Biological Process	GO:1903532	5	positive regulation of secretion by cell	1.93	0.000584623	P80108	Phosphatidylinositol-glycan-specific phospholipase D OS=Homo sapiens OX=9606 GN=GPLD1 PE=1 SV=3	GPLD1	92.335	7.7	5	5	5	5	109680000
Biological Process	GO:1903532	5	positive regulation of secretion by cell	1.93	0.000584623	Q8IUG5	Unconventional myosin-XVIIIb OS=Homo sapiens OX=9606 GN=MYO18B PE=1 SV=2	MYO18B	285.21	0	0	0	0	0	0
Biological Process	GO:1903532	5	positive regulation of secretion by cell	1.93	0.000584623	Q96IY4	Carboxypeptidase B2 OS=Homo sapiens OX=9606 GN=CPB2 PE=1 SV=2	CPB2	48.424	16.3	2	3	3	3	43281000
Biological Process	GO:1903532	5	positive regulation of secretion by cell	1.93	0.000584623	Q96P63	Serpin B12 OS=Homo sapiens OX=9606 GN=SERPINB12 PE=1 SV=1	SERPINB12	46.276	3	1	1	1	1	3836800
Biological Process	GO:1903532	5	positive regulation of secretion by cell	1.93	0.000584623	Q9BY67	Cell adhesion molecule 1 OS=Homo sapiens OX=9606 GN=CADM1 PE=1 SV=2	CADM1	48.509	0	0	0	0	0	0
Biological Process	GO:1903532	5	positive regulation of secretion by cell	1.93	0.000584623	Q9NPH3	Interleukin-1 receptor accessory protein OS=Homo sapiens OX=9606 GN=IL1RAP PE=1 SV=2	IL1RAP	65.418	5.3	2	2	2	2	10635000
Biological Process	GO:1903532	5	positive regulation of secretion by cell	1.93	0.000584623	Q9UIV8	Serpin B13 OS=Homo sapiens OX=9606 GN=SERPINB13 PE=1 SV=2	SERPINB13	44.276	0	0	0	0	0	0
Biological Process	GO:1903532	5	positive regulation of secretion by cell	1.93	0.000584623	Q02763	Angiopoietin-1 receptor OS=Homo sapiens OX=9606 GN=TEK PE=1 SV=2	TEK	125.83	0	0	0	0	0	0
Biological Process	GO:1903532	5	positive regulation of secretion by cell	1.93	0.000584623	O94759	Transient receptor potential cation channel subfamily M member 2 OS=Homo sapiens OX=9606 GN=TRPM2 PE=1 SV=2	TRPM2	171.2	0	0	0	0	0	0
Biological Process	GO:1903532	5	positive regulation of secretion by cell	1.93	0.000584623	P0C0L4	Complement C4-A OS=Homo sapiens OX=9606 GN=C4A PE=1 SV=2	C4A	192.78	0	0	0	0	0	0
Biological Process	GO:0034097	4	response to cytokine	1.59	0.0005847	O75369	Filamin-B OS=Homo sapiens OX=9606 GN=FLNB PE=1 SV=2	FLNB	278.16	0	0	0	0	0	0
Biological Process	GO:0034097	4	response to cytokine	1.59	0.0005847	P00441	Superoxide dismutase [Cu-Zn] OS=Homo sapiens OX=9606 GN=SOD1 PE=1 SV=2	SOD1	15.936	0	0	0	0	0	0
Biological Process	GO:0034097	4	response to cytokine	1.59	0.0005847	P01011	Alpha-1-antichymotrypsin OS=Homo sapiens OX=9606 GN=SERPINA3 PE=1 SV=2	SERPINA3	47.65	16.8	5	5	5	5	76232000
Biological Process	GO:0042063	5	gliogenesis	2.32	0.000594995	Q9Y261	Hepatocyte nuclear factor 3-beta OS=Homo sapiens OX=9606 GN=FOXA2 PE=1 SV=1	FOXA2	48.306	0	0	0	0	0	0
Biological Process	GO:0034097	4	response to cytokine	1.59	0.0005847	P37837	Transaldolase OS=Homo sapiens OX=9606 GN=TALDO1 PE=1 SV=2	TALDO1	37.54	0	0	0	0	0	0
Biological Process	GO:0034097	4	response to cytokine	1.59	0.0005847	P40121	Macrophage-capping protein OS=Homo sapiens OX=9606 GN=CAPG PE=1 SV=2	CAPG	38.498	0	0	0	0	0	0
Biological Process	GO:0050830	5	defense response to Gram-positive bacterium	2.9	0.000590436	P30086	Phosphatidylethanolamine-binding protein 1 OS=Homo sapiens OX=9606 GN=PEBP1 PE=1 SV=3	PEBP1	21.057	0	0	0	0	0	0
Biological Process	GO:0050830	5	defense response to Gram-positive bacterium	2.9	0.000590436	P48668	Keratin, type II cytoskeletal 6C OS=Homo sapiens OX=9606 GN=KRT6C PE=1 SV=3	KRT6C	60.024	42.4	16	25	0	11	157050000
Biological Process	GO:0050830	5	defense response to Gram-positive bacterium	2.9	0.000590436	P59666	Neutrophil defensin 3 OS=Homo sapiens OX=9606 GN=DEFA3 PE=1 SV=1	DEFA3	10.245	0	0	0	0	0	0
Biological Process	GO:0050830	5	defense response to Gram-positive bacterium	2.9	0.000590436	P61626	Lysozyme C OS=Homo sapiens OX=9606 GN=LYZ PE=1 SV=1	LYZ	16.537	8.1	2	1	1	1	22211000
Biological Process	GO:0050830	5	defense response to Gram-positive bacterium	2.9	0.000590436	P81605	Dermcidin OS=Homo sapiens OX=9606 GN=DCD PE=1 SV=2	DCD	11.284	52.7	9	5	5	5	219530000
Biological Process	GO:0050830	5	defense response to Gram-positive bacterium	2.9	0.000590436	Q96PD5	N-acetylmuramoyl-L-alanine amidase OS=Homo sapiens OX=9606 GN=PGLYRP2 PE=1 SV=1	PGLYRP2	62.216	30.6	21	11	11	11	3810900000
Biological Process	GO:0050830	5	defense response to Gram-positive bacterium	2.9	0.000590436	Q9H1E1	Ribonuclease 7 OS=Homo sapiens OX=9606 GN=RNASE7 PE=1 SV=2	RNASE7	17.419	10.3	1	1	1	1	0
Biological Process	GO:0050830	5	defense response to Gram-positive bacterium	2.9	0.000590436	P61769	Beta-2-microglobulin OS=Homo sapiens OX=9606 GN=B2M PE=1 SV=1	B2M	13.714	8.4	1	1	1	1	13665000
Biological Process	GO:0042063	5	gliogenesis	2.32	0.000594995	P00441	Superoxide dismutase [Cu-Zn] OS=Homo sapiens OX=9606 GN=SOD1 PE=1 SV=2	SOD1	15.936	0	0	0	0	0	0
Biological Process	GO:0042063	5	gliogenesis	2.32	0.000594995	P00533	Epidermal growth factor receptor OS=Homo sapiens OX=9606 GN=EGFR PE=1 SV=2	EGFR	134.28	0	0	0	0	0	0
Biological Process	GO:0042063	5	gliogenesis	2.32	0.000594995	P01019	Angiotensinogen OS=Homo sapiens OX=9606 GN=AGT PE=1 SV=3	AGT	53.154	7.6	3	3	3	3	91548000
Biological Process	GO:0042063	5	gliogenesis	2.32	0.000594995	P04083	Annexin A1 OS=Homo sapiens OX=9606 GN=ANXA1 PE=1 SV=2	ANXA1	38.714	0	0	0	0	0	0
Biological Process	GO:0042063	5	gliogenesis	2.32	0.000594995	P05109	Protein S100-A8 OS=Homo sapiens OX=9606 GN=S100A8 PE=1 SV=1	S100A8	10.834	0	0	0	0	0	0
Biological Process	GO:0042063	5	gliogenesis	2.32	0.000594995	P06396	Gelsolin OS=Homo sapiens OX=9606 GN=GSN PE=1 SV=1	GSN	85.696	0	0	0	0	0	0
Biological Process	GO:0042063	5	gliogenesis	2.32	0.000594995	P06702	Protein S100-A9 OS=Homo sapiens OX=9606 GN=S100A9 PE=1 SV=1	S100A9	13.242	43	4	3	3	3	31021000
Biological Process	GO:0042063	5	gliogenesis	2.32	0.000594995	P07108	Acyl-CoA-binding protein OS=Homo sapiens OX=9606 GN=DBI PE=1 SV=2	DBI	10.044	0	0	0	0	0	0
Biological Process	GO:0042063	5	gliogenesis	2.32	0.000594995	P07333	Macrophage colony-stimulating factor 1 receptor OS=Homo sapiens OX=9606 GN=CSF1R PE=1 SV=2	CSF1R	107.98	2.2	2	2	2	2	24589000
Biological Process	GO:0042063	5	gliogenesis	2.32	0.000594995	P08670	Vimentin OS=Homo sapiens OX=9606 GN=VIM PE=1 SV=4	VIM	53.651	0	0	0	0	0	0
Biological Process	GO:0042063	5	gliogenesis	2.32	0.000594995	P09211	Glutathione S-transferase P OS=Homo sapiens OX=9606 GN=GSTP1 PE=1 SV=2	GSTP1	23.356	0	0	0	0	0	0
Biological Process	GO:0042063	5	gliogenesis	2.32	0.000594995	P13639	Elongation factor 2 OS=Homo sapiens OX=9606 GN=EEF2 PE=1 SV=4	EEF2	95.337	0	0	0	0	0	0
Biological Process	GO:0042063	5	gliogenesis	2.32	0.000594995	P23470	Receptor-type tyrosine-protein phosphatase gamma OS=Homo sapiens OX=9606 GN=PTPRG PE=1 SV=4	PTPRG	162	1	1	1	1	1	5890900
Biological Process	GO:0042063	5	gliogenesis	2.32	0.000594995	Q12913	Receptor-type tyrosine-protein phosphatase eta OS=Homo sapiens OX=9606 GN=PTPRJ PE=1 SV=3	PTPRJ	145.94	2.7	3	3	3	3	26199000
Biological Process	GO:0042063	5	gliogenesis	2.32	0.000594995	Q8NFT8	Delta and Notch-like epidermal growth factor-related receptor OS=Homo sapiens OX=9606 GN=DNER PE=1 SV=1	DNER	78.474	0	0	0	0	0	0
Biological Process	GO:0050830	5	defense response to Gram-positive bacterium	2.9	0.000590436	P13647	Keratin, type II cytoskeletal 5 OS=Homo sapiens OX=9606 GN=KRT5 PE=1 SV=3	KRT5	62.378	41.4	43	29	16	22	662780000
Biological Process	GO:0034097	4	response to cytokine	1.59	0.0005847	P38646	Stress-70 protein, mitochondrial OS=Homo sapiens OX=9606 GN=HSPA9 PE=1 SV=2	HSPA9	73.68	0	0	0	0	0	0
Biological Process	GO:0050830	5	defense response to Gram-positive bacterium	2.9	0.000590436	P04259	Keratin, type II cytoskeletal 6B OS=Homo sapiens OX=9606 GN=KRT6B PE=1 SV=5	KRT6B	60.066	36.3	3	23	2	2	10185000
Biological Process	GO:0050830	5	defense response to Gram-positive bacterium	2.9	0.000590436	P02787	Serotransferrin OS=Homo sapiens OX=9606 GN=TF PE=1 SV=4	TF	77.049	60.5	160	43	43	43	50131000000
Biological Process	GO:0034097	4	response to cytokine	1.59	0.0005847	P42224	Signal transducer and activator of transcription 1-alpha/beta OS=Homo sapiens OX=9606 GN=STAT1 PE=1 SV=2	STAT1	87.334	0	0	0	0	0	0
Biological Process	GO:0034097	4	response to cytokine	1.59	0.0005847	P49662	Caspase-4 OS=Homo sapiens OX=9606 GN=CASP4 PE=1 SV=1	CASP4	43.262	4	6	1	1	1	29842000
Biological Process	GO:0034097	4	response to cytokine	1.59	0.0005847	P52907	F-actin-capping protein subunit alpha-1 OS=Homo sapiens OX=9606 GN=CAPZA1 PE=1 SV=3	CAPZA1	32.922	0	0	0	0	0	0
Biological Process	GO:0034097	4	response to cytokine	1.59	0.0005847	P63261	Actin, cytoplasmic 2 OS=Homo sapiens OX=9606 GN=ACTG1 PE=1 SV=1	ACTG1	41.792	9.3	1	3	3	3	4758900
Biological Process	GO:0034097	4	response to cytokine	1.59	0.0005847	P62937	Peptidyl-prolyl cis-trans isomerase A OS=Homo sapiens OX=9606 GN=PPIA PE=1 SV=2	PPIA	18.012	0	0	0	0	0	0
Biological Process	GO:0034097	4	response to cytokine	1.59	0.0005847	P63104	14-3-3 protein zeta/delta OS=Homo sapiens OX=9606 GN=YWHAZ PE=1 SV=1	YWHAZ	27.745	0	0	0	0	0	0
Biological Process	GO:0034097	4	response to cytokine	1.59	0.0005847	P78417	Glutathione S-transferase omega-1 OS=Homo sapiens OX=9606 GN=GSTO1 PE=1 SV=2	GSTO1	27.566	0	0	0	0	0	0
Biological Process	GO:0034097	4	response to cytokine	1.59	0.0005847	P80188	Neutrophil gelatinase-associated lipocalin OS=Homo sapiens OX=9606 GN=LCN2 PE=1 SV=2	LCN2	22.588	0	0	0	0	0	0
Biological Process	GO:0034097	4	response to cytokine	1.59	0.0005847	Q14624	Inter-alpha-trypsin inhibitor heavy chain H4 OS=Homo sapiens OX=9606 GN=ITIH4 PE=1 SV=4	ITIH4	103.36	3	2	2	2	2	16456000
Biological Process	GO:0034097	4	response to cytokine	1.59	0.0005847	Q16658	Fascin OS=Homo sapiens OX=9606 GN=FSCN1 PE=1 SV=3	FSCN1	54.529	0	0	0	0	0	0
Biological Process	GO:0034097	4	response to cytokine	1.59	0.0005847	Q96FW1	Ubiquitin thioesterase OTUB1 OS=Homo sapiens OX=9606 GN=OTUB1 PE=1 SV=2	OTUB1	31.284	0	0	0	0	0	0
Biological Process	GO:0034097	4	response to cytokine	1.59	0.0005847	Q9NPH3	Interleukin-1 receptor accessory protein OS=Homo sapiens OX=9606 GN=IL1RAP PE=1 SV=2	IL1RAP	65.418	5.3	2	2	2	2	10635000
Biological Process	GO:0034097	4	response to cytokine	1.59	0.0005847	Q9NZH8	Interleukin-36 gamma OS=Homo sapiens OX=9606 GN=IL36G PE=1 SV=1	IL36G	18.721	10.7	1	1	1	1	0
Biological Process	GO:0034097	4	response to cytokine	1.59	0.0005847	Q9NZT1	Calmodulin-like protein 5 OS=Homo sapiens OX=9606 GN=CALML5 PE=1 SV=2	CALML5	15.892	21.2	4	3	3	3	12650000
Biological Process	GO:0034097	4	response to cytokine	1.59	0.0005847	Q9Y261	Hepatocyte nuclear factor 3-beta OS=Homo sapiens OX=9606 GN=FOXA2 PE=1 SV=1	FOXA2	48.306	0	0	0	0	0	0
Biological Process	GO:0034097	4	response to cytokine	1.59	0.0005847	P01033	Metalloproteinase inhibitor 1 OS=Homo sapiens OX=9606 GN=TIMP1 PE=1 SV=1	TIMP1	23.171	12.1	1	2	2	2	17139000
Biological Process	GO:0034097	4	response to cytokine	1.59	0.0005847	P13598	Intercellular adhesion molecule 2 OS=Homo sapiens OX=9606 GN=ICAM2 PE=1 SV=2	ICAM2	30.654	0	0	0	0	0	0
Biological Process	GO:0034097	4	response to cytokine	1.59	0.0005847	P61769	Beta-2-microglobulin OS=Homo sapiens OX=9606 GN=B2M PE=1 SV=1	B2M	13.714	8.4	1	1	1	1	13665000
Biological Process	GO:0034097	4	response to cytokine	1.59	0.0005847	Q01628	Interferon-induced transmembrane protein 3 OS=Homo sapiens OX=9606 GN=IFITM3 PE=1 SV=2	IFITM3	14.632	0	0	0	0	0	0
Biological Process	GO:0034097	4	response to cytokine	1.59	0.0005847	P00746	Complement factor D OS=Homo sapiens OX=9606 GN=CFD PE=1 SV=5	CFD	27.033	0	0	0	0	0	0
Biological Process	GO:0034097	4	response to cytokine	1.59	0.0005847	Q99650	Oncostatin-M-specific receptor subunit beta OS=Homo sapiens OX=9606 GN=OSMR PE=1 SV=1	OSMR	110.51	0	0	0	0	0	0
Biological Process	GO:0034097	4	response to cytokine	1.59	0.0005847	Q9Y4C1	Lysine-specific demethylase 3A OS=Homo sapiens OX=9606 GN=KDM3A PE=1 SV=4	KDM3A	147.34	1	1	1	1	1	33437000
Biological Process	GO:0050830	5	defense response to Gram-positive bacterium	2.9	0.000590436	P02538	Keratin, type II cytoskeletal 6A OS=Homo sapiens OX=9606 GN=KRT6A PE=1 SV=3	KRT6A	60.044	42.4	3	24	2	2	61562000
Biological Process	GO:0050830	5	defense response to Gram-positive bacterium	2.9	0.000590436	P02788	Lactotransferrin OS=Homo sapiens OX=9606 GN=LTF PE=1 SV=6	LTF	78.181	16.3	11	9	9	9	133970000
Biological Process	GO:0009966	4	regulation of signal transduction	1.31	0.000596041	Q9HCD5	Nuclear receptor coactivator 5 OS=Homo sapiens OX=9606 GN=NCOA5 PE=1 SV=2	NCOA5	65.536	0	0	0	0	0	0
Biological Process	GO:0009966	4	regulation of signal transduction	1.31	0.000596041	Q9NZH8	Interleukin-36 gamma OS=Homo sapiens OX=9606 GN=IL36G PE=1 SV=1	IL36G	18.721	10.7	1	1	1	1	0
Biological Process	GO:0009966	4	regulation of signal transduction	1.31	0.000596041	Q9UHA4	Ragulator complex protein LAMTOR3 OS=Homo sapiens OX=9606 GN=LAMTOR3 PE=1 SV=1	LAMTOR3	13.623	0	0	0	0	0	0
Biological Process	GO:0044706	2	multi-multicellular organism process	2.28	0.00068305	P05089	Arginase-1 OS=Homo sapiens OX=9606 GN=ARG1 PE=1 SV=2	ARG1	34.735	8.4	5	3	3	3	32997000
Biological Process	GO:0044706	2	multi-multicellular organism process	2.28	0.00068305	P05556	Integrin beta-1 OS=Homo sapiens OX=9606 GN=ITGB1 PE=1 SV=2	ITGB1	88.414	0	0	0	0	0	0
Biological Process	GO:0044706	2	multi-multicellular organism process	2.28	0.00068305	P08670	Vimentin OS=Homo sapiens OX=9606 GN=VIM PE=1 SV=4	VIM	53.651	0	0	0	0	0	0
Biological Process	GO:0044706	2	multi-multicellular organism process	2.28	0.00068305	P0C869	Cytosolic phospholipase A2 beta OS=Homo sapiens OX=9606 GN=PLA2G4B PE=1 SV=2	PLA2G4B	87.977	0	0	0	0	0	0
Biological Process	GO:0044706	2	multi-multicellular organism process	2.28	0.00068305	P12830	Cadherin-1 OS=Homo sapiens OX=9606 GN=CDH1 PE=1 SV=3	CDH1	97.455	1.8	2	2	2	2	7974000
Biological Process	GO:0044706	2	multi-multicellular organism process	2.28	0.00068305	P15291	Beta-1,4-galactosyltransferase 1 OS=Homo sapiens OX=9606 GN=B4GALT1 PE=1 SV=5	B4GALT1	43.92	0	0	0	0	0	0
Biological Process	GO:0044706	2	multi-multicellular organism process	2.28	0.00068305	P18510	Interleukin-1 receptor antagonist protein OS=Homo sapiens OX=9606 GN=IL1RN PE=1 SV=1	IL1RN	20.055	0	0	0	0	0	0
Biological Process	GO:0044706	2	multi-multicellular organism process	2.28	0.00068305	P43490	Nicotinamide phosphoribosyltransferase OS=Homo sapiens OX=9606 GN=NAMPT PE=1 SV=1	NAMPT	55.52	0	0	0	0	0	0
Biological Process	GO:0044706	2	multi-multicellular organism process	2.28	0.00068305	Q15149	Plectin OS=Homo sapiens OX=9606 GN=PLEC PE=1 SV=3	PLEC	531.78	0	0	0	0	0	0
Biological Process	GO:0044706	2	multi-multicellular organism process	2.28	0.00068305	Q15648	Mediator of RNA polymerase II transcription subunit 1 OS=Homo sapiens OX=9606 GN=MED1 PE=1 SV=4	MED1	168.48	0	0	0	0	0	0
Biological Process	GO:0044706	2	multi-multicellular organism process	2.28	0.00068305	P01034	Cystatin-C OS=Homo sapiens OX=9606 GN=CST3 PE=1 SV=1	CST3	15.799	23.3	3	3	3	3	14030000
Biological Process	GO:0044706	2	multi-multicellular organism process	2.28	0.00068305	Q9UIQ6	Leucyl-cystinyl aminopeptidase OS=Homo sapiens OX=9606 GN=LNPEP PE=1 SV=3	LNPEP	117.35	0	0	0	0	0	0
Biological Process	GO:0044706	2	multi-multicellular organism process	2.28	0.00068305	Q07075	Glutamyl aminopeptidase OS=Homo sapiens OX=9606 GN=ENPEP PE=1 SV=3	ENPEP	109.24	0	0	0	0	0	0
Biological Process	GO:0061061	3	muscle structure development	1.76	0.000692136	O75369	Filamin-B OS=Homo sapiens OX=9606 GN=FLNB PE=1 SV=2	FLNB	278.16	0	0	0	0	0	0
Biological Process	GO:0061061	3	muscle structure development	1.76	0.000692136	P00338	L-lactate dehydrogenase A chain OS=Homo sapiens OX=9606 GN=LDHA PE=1 SV=2	LDHA	36.688	0	0	0	0	0	0
Biological Process	GO:0061061	3	muscle structure development	1.76	0.000692136	P00533	Epidermal growth factor receptor OS=Homo sapiens OX=9606 GN=EGFR PE=1 SV=2	EGFR	134.28	0	0	0	0	0	0
Biological Process	GO:0061061	3	muscle structure development	1.76	0.000692136	P00558	Phosphoglycerate kinase 1 OS=Homo sapiens OX=9606 GN=PGK1 PE=1 SV=3	PGK1	44.614	0	0	0	0	0	0
Biological Process	GO:0061061	3	muscle structure development	1.76	0.000692136	P01019	Angiotensinogen OS=Homo sapiens OX=9606 GN=AGT PE=1 SV=3	AGT	53.154	7.6	3	3	3	3	91548000
Biological Process	GO:0061061	3	muscle structure development	1.76	0.000692136	P02545	Prelamin-A/C OS=Homo sapiens OX=9606 GN=LMNA PE=1 SV=1	LMNA	74.139	0	0	0	0	0	0
Biological Process	GO:0061061	3	muscle structure development	1.76	0.000692136	P02647	Apolipoprotein A-I OS=Homo sapiens OX=9606 GN=APOA1 PE=1 SV=1	APOA1	30.777	20.6	5	5	5	5	76295000
Biological Process	GO:0061061	3	muscle structure development	1.76	0.000692136	P04406	Glyceraldehyde-3-phosphate dehydrogenase OS=Homo sapiens OX=9606 GN=GAPDH PE=1 SV=3	GAPDH	36.053	28.7	5	6	6	6	28325000
Biological Process	GO:0061061	3	muscle structure development	1.76	0.000692136	P05556	Integrin beta-1 OS=Homo sapiens OX=9606 GN=ITGB1 PE=1 SV=2	ITGB1	88.414	0	0	0	0	0	0
Biological Process	GO:0061061	3	muscle structure development	1.76	0.000692136	P06276	Cholinesterase OS=Homo sapiens OX=9606 GN=BCHE PE=1 SV=1	BCHE	68.417	5.1	2	2	2	2	90413000
Biological Process	GO:0044706	2	multi-multicellular organism process	2.28	0.00068305	P04792	Heat shock protein beta-1 OS=Homo sapiens OX=9606 GN=HSPB1 PE=1 SV=2	HSPB1	22.782	7.8	1	1	1	1	1730200
Biological Process	GO:0061061	3	muscle structure development	1.76	0.000692136	P07384	Calpain-1 catalytic subunit OS=Homo sapiens OX=9606 GN=CAPN1 PE=1 SV=1	CAPN1	81.889	0	0	0	0	0	0
Biological Process	GO:0044706	2	multi-multicellular organism process	2.28	0.00068305	P02774	Vitamin D-binding protein OS=Homo sapiens OX=9606 GN=GC PE=1 SV=2	GC	52.917	29.3	14	11	11	11	792270000
Biological Process	GO:0044706	2	multi-multicellular organism process	2.28	0.00068305	P01019	Angiotensinogen OS=Homo sapiens OX=9606 GN=AGT PE=1 SV=3	AGT	53.154	7.6	3	3	3	3	91548000
Biological Process	GO:0002437	3	inflammatory response to antigenic stimulus	5.57	0.000663429	P02763	Alpha-1-acid glycoprotein 1 OS=Homo sapiens OX=9606 GN=ORM1 PE=1 SV=2	ORM1	23.539	41.8	11	8	6	6	3742300000
Biological Process	GO:0002437	3	inflammatory response to antigenic stimulus	5.57	0.000663429	P05362	Intercellular adhesion molecule 1 OS=Homo sapiens OX=9606 GN=ICAM1 PE=1 SV=2	ICAM1	57.825	0	0	0	0	0	0
Biological Process	GO:0002437	3	inflammatory response to antigenic stimulus	5.57	0.000663429	P18510	Interleukin-1 receptor antagonist protein OS=Homo sapiens OX=9606 GN=IL1RN PE=1 SV=1	IL1RN	20.055	0	0	0	0	0	0
Biological Process	GO:0002437	3	inflammatory response to antigenic stimulus	5.57	0.000663429	P19652	Alpha-1-acid glycoprotein 2 OS=Homo sapiens OX=9606 GN=ORM2 PE=1 SV=2	ORM2	23.602	34.8	25	8	6	8	4912700000
Biological Process	GO:0002437	3	inflammatory response to antigenic stimulus	5.57	0.000663429	P23526	Adenosylhomocysteinase OS=Homo sapiens OX=9606 GN=AHCY PE=1 SV=4	AHCY	47.716	0	0	0	0	0	0
Biological Process	GO:0002437	3	inflammatory response to antigenic stimulus	5.57	0.000663429	P00746	Complement factor D OS=Homo sapiens OX=9606 GN=CFD PE=1 SV=5	CFD	27.033	0	0	0	0	0	0
Biological Process	GO:0065005	6	protein-lipid complex assembly	5.57	0.000663429	P02647	Apolipoprotein A-I OS=Homo sapiens OX=9606 GN=APOA1 PE=1 SV=1	APOA1	30.777	20.6	5	5	5	5	76295000
Biological Process	GO:0065005	6	protein-lipid complex assembly	5.57	0.000663429	P02652	Apolipoprotein A-II OS=Homo sapiens OX=9606 GN=APOA2 PE=1 SV=1	APOA2	11.175	19	7	3	3	3	7512000000
Biological Process	GO:0065005	6	protein-lipid complex assembly	5.57	0.000663429	P02654	Apolipoprotein C-I OS=Homo sapiens OX=9606 GN=APOC1 PE=1 SV=1	APOC1	9.3318	34.9	3	3	3	3	164400000
Biological Process	GO:0065005	6	protein-lipid complex assembly	5.57	0.000663429	P02655	Apolipoprotein C-II OS=Homo sapiens OX=9606 GN=APOC2 PE=1 SV=1	APOC2	11.284	19.8	3	2	2	2	111850000
Biological Process	GO:0065005	6	protein-lipid complex assembly	5.57	0.000663429	P02656	Apolipoprotein C-III OS=Homo sapiens OX=9606 GN=APOC3 PE=1 SV=1	APOC3	10.852	0	0	0	0	0	0
Biological Process	GO:0065005	6	protein-lipid complex assembly	5.57	0.000663429	O95445	Apolipoprotein M OS=Homo sapiens OX=9606 GN=APOM PE=1 SV=2	APOM	21.253	0	0	0	0	0	0
Biological Process	GO:0090207	5	regulation of triglyceride metabolic process	4.15	0.000674662	P01024	Complement C3 OS=Homo sapiens OX=9606 GN=C3 PE=1 SV=2	C3	187.15	0	0	0	0	0	0
Biological Process	GO:0090207	5	regulation of triglyceride metabolic process	4.15	0.000674662	P02647	Apolipoprotein A-I OS=Homo sapiens OX=9606 GN=APOA1 PE=1 SV=1	APOA1	30.777	20.6	5	5	5	5	76295000
Biological Process	GO:0090207	5	regulation of triglyceride metabolic process	4.15	0.000674662	P02655	Apolipoprotein C-II OS=Homo sapiens OX=9606 GN=APOC2 PE=1 SV=1	APOC2	11.284	19.8	3	2	2	2	111850000
Biological Process	GO:0090207	5	regulation of triglyceride metabolic process	4.15	0.000674662	P02656	Apolipoprotein C-III OS=Homo sapiens OX=9606 GN=APOC3 PE=1 SV=1	APOC3	10.852	0	0	0	0	0	0
Biological Process	GO:0090207	5	regulation of triglyceride metabolic process	4.15	0.000674662	P02749	Beta-2-glycoprotein 1 OS=Homo sapiens OX=9606 GN=APOH PE=1 SV=3	APOH	38.298	30.4	26	10	10	10	5331200000
Biological Process	GO:0090207	5	regulation of triglyceride metabolic process	4.15	0.000674662	P0C0L5	Complement C4-B OS=Homo sapiens OX=9606 GN=C4B_2 PE=1 SV=2	C4B_2	192.75	2.9	4	3	3	3	50961000
Biological Process	GO:0090207	5	regulation of triglyceride metabolic process	4.15	0.000674662	P80108	Phosphatidylinositol-glycan-specific phospholipase D OS=Homo sapiens OX=9606 GN=GPLD1 PE=1 SV=3	GPLD1	92.335	7.7	5	5	5	5	109680000
Biological Process	GO:0090207	5	regulation of triglyceride metabolic process	4.15	0.000674662	P0C0L4	Complement C4-A OS=Homo sapiens OX=9606 GN=C4A PE=1 SV=2	C4A	192.78	0	0	0	0	0	0
Biological Process	GO:0044706	2	multi-multicellular organism process	2.28	0.00068305	A8K2U0	Alpha-2-macroglobulin-like protein 1 OS=Homo sapiens OX=9606 GN=A2ML1 PE=1 SV=3	A2ML1	161.1	0	0	0	0	0	0
Biological Process	GO:0044706	2	multi-multicellular organism process	2.28	0.00068305	O00327	Basic helix-loop-helix ARNT-like protein 1 OS=Homo sapiens OX=9606 GN=BMAL1 PE=1 SV=2	BMAL1	68.761	0	0	0	0	0	0
Biological Process	GO:0044706	2	multi-multicellular organism process	2.28	0.00068305	P00441	Superoxide dismutase [Cu-Zn] OS=Homo sapiens OX=9606 GN=SOD1 PE=1 SV=2	SOD1	15.936	0	0	0	0	0	0
Biological Process	GO:0044706	2	multi-multicellular organism process	2.28	0.00068305	P02760	Protein AMBP OS=Homo sapiens OX=9606 GN=AMBP PE=1 SV=1	AMBP	38.999	31	10	8	8	8	794190000
Biological Process	GO:0090132	3	epithelium migration	2.29	0.00065101	P13646	Keratin, type I cytoskeletal 13 OS=Homo sapiens OX=9606 GN=KRT13 PE=1 SV=4	KRT13	49.588	6.6	1	2	1	1	681050
Biological Process	GO:0061061	3	muscle structure development	1.76	0.000692136	P08727	Keratin, type I cytoskeletal 19 OS=Homo sapiens OX=9606 GN=KRT19 PE=1 SV=4	KRT19	44.105	0	0	0	0	0	0
Biological Process	GO:0061061	3	muscle structure development	1.76	0.000692136	P11142	Heat shock cognate 71 kDa protein OS=Homo sapiens OX=9606 GN=HSPA8 PE=1 SV=1	HSPA8	70.897	0	0	0	0	0	0
Biological Process	GO:0010001	4	glial cell differentiation	2.51	0.000700218	P05109	Protein S100-A8 OS=Homo sapiens OX=9606 GN=S100A8 PE=1 SV=1	S100A8	10.834	0	0	0	0	0	0
Biological Process	GO:0010001	4	glial cell differentiation	2.51	0.000700218	P06396	Gelsolin OS=Homo sapiens OX=9606 GN=GSN PE=1 SV=1	GSN	85.696	0	0	0	0	0	0
Biological Process	GO:0010001	4	glial cell differentiation	2.51	0.000700218	P06702	Protein S100-A9 OS=Homo sapiens OX=9606 GN=S100A9 PE=1 SV=1	S100A9	13.242	43	4	3	3	3	31021000
Biological Process	GO:0010001	4	glial cell differentiation	2.51	0.000700218	P07333	Macrophage colony-stimulating factor 1 receptor OS=Homo sapiens OX=9606 GN=CSF1R PE=1 SV=2	CSF1R	107.98	2.2	2	2	2	2	24589000
Biological Process	GO:0010001	4	glial cell differentiation	2.51	0.000700218	P08670	Vimentin OS=Homo sapiens OX=9606 GN=VIM PE=1 SV=4	VIM	53.651	0	0	0	0	0	0
Biological Process	GO:0010001	4	glial cell differentiation	2.51	0.000700218	P09211	Glutathione S-transferase P OS=Homo sapiens OX=9606 GN=GSTP1 PE=1 SV=2	GSTP1	23.356	0	0	0	0	0	0
Biological Process	GO:0010001	4	glial cell differentiation	2.51	0.000700218	P23470	Receptor-type tyrosine-protein phosphatase gamma OS=Homo sapiens OX=9606 GN=PTPRG PE=1 SV=4	PTPRG	162	1	1	1	1	1	5890900
Biological Process	GO:0010001	4	glial cell differentiation	2.51	0.000700218	Q12913	Receptor-type tyrosine-protein phosphatase eta OS=Homo sapiens OX=9606 GN=PTPRJ PE=1 SV=3	PTPRJ	145.94	2.7	3	3	3	3	26199000
Biological Process	GO:0010001	4	glial cell differentiation	2.51	0.000700218	Q8NFT8	Delta and Notch-like epidermal growth factor-related receptor OS=Homo sapiens OX=9606 GN=DNER PE=1 SV=1	DNER	78.474	0	0	0	0	0	0
Biological Process	GO:0010001	4	glial cell differentiation	2.51	0.000700218	Q9BXM0	Periaxin OS=Homo sapiens OX=9606 GN=PRX PE=1 SV=2	PRX	154.9	0	0	0	0	0	0
Biological Process	GO:0010001	4	glial cell differentiation	2.51	0.000700218	Q9Y261	Hepatocyte nuclear factor 3-beta OS=Homo sapiens OX=9606 GN=FOXA2 PE=1 SV=1	FOXA2	48.306	0	0	0	0	0	0
Biological Process	GO:0010001	4	glial cell differentiation	2.51	0.000700218	Q07954	Prolow-density lipoprotein receptor-related protein 1 OS=Homo sapiens OX=9606 GN=LRP1 PE=1 SV=2	LRP1	504.6	0	0	0	0	0	0
Biological Process	GO:0010001	4	glial cell differentiation	2.51	0.000700218	P19022	Cadherin-2 OS=Homo sapiens OX=9606 GN=CDH2 PE=1 SV=4	CDH2	99.808	0	0	0	0	0	0
Biological Process	GO:0007565	3	female pregnancy	2.43	0.000701101	A8K2U0	Alpha-2-macroglobulin-like protein 1 OS=Homo sapiens OX=9606 GN=A2ML1 PE=1 SV=3	A2ML1	161.1	0	0	0	0	0	0
Biological Process	GO:0007565	3	female pregnancy	2.43	0.000701101	P00441	Superoxide dismutase [Cu-Zn] OS=Homo sapiens OX=9606 GN=SOD1 PE=1 SV=2	SOD1	15.936	0	0	0	0	0	0
Biological Process	GO:0007565	3	female pregnancy	2.43	0.000701101	P01019	Angiotensinogen OS=Homo sapiens OX=9606 GN=AGT PE=1 SV=3	AGT	53.154	7.6	3	3	3	3	91548000
Biological Process	GO:0007565	3	female pregnancy	2.43	0.000701101	P02760	Protein AMBP OS=Homo sapiens OX=9606 GN=AMBP PE=1 SV=1	AMBP	38.999	31	10	8	8	8	794190000
Biological Process	GO:0007565	3	female pregnancy	2.43	0.000701101	P02774	Vitamin D-binding protein OS=Homo sapiens OX=9606 GN=GC PE=1 SV=2	GC	52.917	29.3	14	11	11	11	792270000
Biological Process	GO:0007565	3	female pregnancy	2.43	0.000701101	P04792	Heat shock protein beta-1 OS=Homo sapiens OX=9606 GN=HSPB1 PE=1 SV=2	HSPB1	22.782	7.8	1	1	1	1	1730200
Biological Process	GO:0007565	3	female pregnancy	2.43	0.000701101	P05089	Arginase-1 OS=Homo sapiens OX=9606 GN=ARG1 PE=1 SV=2	ARG1	34.735	8.4	5	3	3	3	32997000
Biological Process	GO:0007565	3	female pregnancy	2.43	0.000701101	P05556	Integrin beta-1 OS=Homo sapiens OX=9606 GN=ITGB1 PE=1 SV=2	ITGB1	88.414	0	0	0	0	0	0
Biological Process	GO:0007565	3	female pregnancy	2.43	0.000701101	P08670	Vimentin OS=Homo sapiens OX=9606 GN=VIM PE=1 SV=4	VIM	53.651	0	0	0	0	0	0
Biological Process	GO:0007565	3	female pregnancy	2.43	0.000701101	P12830	Cadherin-1 OS=Homo sapiens OX=9606 GN=CDH1 PE=1 SV=3	CDH1	97.455	1.8	2	2	2	2	7974000
Biological Process	GO:0010001	4	glial cell differentiation	2.51	0.000700218	P01019	Angiotensinogen OS=Homo sapiens OX=9606 GN=AGT PE=1 SV=3	AGT	53.154	7.6	3	3	3	3	91548000
Biological Process	GO:0061061	3	muscle structure development	1.76	0.000692136	P09619	Platelet-derived growth factor receptor beta OS=Homo sapiens OX=9606 GN=PDGFRB PE=1 SV=1	PDGFRB	123.97	2.9	3	2	2	2	4182400
Biological Process	GO:0010001	4	glial cell differentiation	2.51	0.000700218	P00533	Epidermal growth factor receptor OS=Homo sapiens OX=9606 GN=EGFR PE=1 SV=2	EGFR	134.28	0	0	0	0	0	0
Biological Process	GO:0061061	3	muscle structure development	1.76	0.000692136	P29536	Leiomodin-1 OS=Homo sapiens OX=9606 GN=LMOD1 PE=1 SV=3	LMOD1	67.029	1.7	1	1	1	1	5208900
Biological Process	GO:0061061	3	muscle structure development	1.76	0.000692136	P12532	Creatine kinase U-type, mitochondrial OS=Homo sapiens OX=9606 GN=CKMT1B PE=1 SV=1	CKMT1B	47.036	0	0	0	0	0	0
Biological Process	GO:0061061	3	muscle structure development	1.76	0.000692136	P13639	Elongation factor 2 OS=Homo sapiens OX=9606 GN=EEF2 PE=1 SV=4	EEF2	95.337	0	0	0	0	0	0
Biological Process	GO:0061061	3	muscle structure development	1.76	0.000692136	P14618	Pyruvate kinase PKM OS=Homo sapiens OX=9606 GN=PKM PE=1 SV=4	PKM	57.936	0	0	0	0	0	0
Biological Process	GO:0061061	3	muscle structure development	1.76	0.000692136	P14635	G2/mitotic-specific cyclin-B1 OS=Homo sapiens OX=9606 GN=CCNB1 PE=1 SV=1	CCNB1	48.337	0	0	0	0	0	0
Biological Process	GO:0061061	3	muscle structure development	1.76	0.000692136	P15924	Desmoplakin OS=Homo sapiens OX=9606 GN=DSP PE=1 SV=3	DSP	331.77	4.1	10	8	8	8	36295000
Biological Process	GO:0061061	3	muscle structure development	1.76	0.000692136	P17813	Endoglin OS=Homo sapiens OX=9606 GN=ENG PE=1 SV=2	ENG	70.577	0	0	0	0	0	0
Biological Process	GO:0061061	3	muscle structure development	1.76	0.000692136	P26992	Ciliary neurotrophic factor receptor subunit alpha OS=Homo sapiens OX=9606 GN=CNTFR PE=1 SV=2	CNTFR	40.633	3.5	1	1	1	1	4217500
Biological Process	GO:0061061	3	muscle structure development	1.76	0.000692136	P28676	Grancalcin OS=Homo sapiens OX=9606 GN=GCA PE=1 SV=2	GCA	24.01	0	0	0	0	0	0
Biological Process	GO:0061061	3	muscle structure development	1.76	0.000692136	P35579	Myosin-9 OS=Homo sapiens OX=9606 GN=MYH9 PE=1 SV=4	MYH9	226.53	1.8	2	2	2	2	2939500
Biological Process	GO:0061061	3	muscle structure development	1.76	0.000692136	P46939	Utrophin OS=Homo sapiens OX=9606 GN=UTRN PE=1 SV=2	UTRN	394.46	0.5	1	1	1	1	0
Biological Process	GO:0061061	3	muscle structure development	1.76	0.000692136	P47756	F-actin-capping protein subunit beta OS=Homo sapiens OX=9606 GN=CAPZB PE=1 SV=5	CAPZB	30.628	0	0	0	0	0	0
Biological Process	GO:0061061	3	muscle structure development	1.76	0.000692136	P60174	Triosephosphate isomerase OS=Homo sapiens OX=9606 GN=TPI1 PE=1 SV=4	TPI1	26.669	0	0	0	0	0	0
Biological Process	GO:0061061	3	muscle structure development	1.76	0.000692136	P63261	Actin, cytoplasmic 2 OS=Homo sapiens OX=9606 GN=ACTG1 PE=1 SV=1	ACTG1	41.792	9.3	1	3	3	3	4758900
Biological Process	GO:0061061	3	muscle structure development	1.76	0.000692136	P68133	Actin, alpha skeletal muscle OS=Homo sapiens OX=9606 GN=ACTA1 PE=1 SV=1	ACTA1	42.051	0	0	0	0	0	0
Biological Process	GO:0061061	3	muscle structure development	1.76	0.000692136	Q15149	Plectin OS=Homo sapiens OX=9606 GN=PLEC PE=1 SV=3	PLEC	531.78	0	0	0	0	0	0
Biological Process	GO:0061061	3	muscle structure development	1.76	0.000692136	Q15648	Mediator of RNA polymerase II transcription subunit 1 OS=Homo sapiens OX=9606 GN=MED1 PE=1 SV=4	MED1	168.48	0	0	0	0	0	0
Biological Process	GO:0061061	3	muscle structure development	1.76	0.000692136	Q8NFT8	Delta and Notch-like epidermal growth factor-related receptor OS=Homo sapiens OX=9606 GN=DNER PE=1 SV=1	DNER	78.474	0	0	0	0	0	0
Biological Process	GO:0061061	3	muscle structure development	1.76	0.000692136	Q9H944	Mediator of RNA polymerase II transcription subunit 20 OS=Homo sapiens OX=9606 GN=MED20 PE=1 SV=1	MED20	23.222	0	0	0	0	0	0
Biological Process	GO:0061061	3	muscle structure development	1.76	0.000692136	O60282	Kinesin heavy chain isoform 5C OS=Homo sapiens OX=9606 GN=KIF5C PE=1 SV=1	KIF5C	109.49	0.8	9	1	1	1	2190000000
Biological Process	GO:0061061	3	muscle structure development	1.76	0.000692136	Q13573	SNW domain-containing protein 1 OS=Homo sapiens OX=9606 GN=SNW1 PE=1 SV=1	SNW1	61.494	0	0	0	0	0	0
Biological Process	GO:0061061	3	muscle structure development	1.76	0.000692136	Q9NZQ9	Tropomodulin-4 OS=Homo sapiens OX=9606 GN=TMOD4 PE=1 SV=1	TMOD4	39.335	2.9	2	1	1	1	105740000
Biological Process	GO:0061061	3	muscle structure development	1.76	0.000692136	P19022	Cadherin-2 OS=Homo sapiens OX=9606 GN=CDH2 PE=1 SV=4	CDH2	99.808	0	0	0	0	0	0
Biological Process	GO:0061061	3	muscle structure development	1.76	0.000692136	O15409	Forkhead box protein P2 OS=Homo sapiens OX=9606 GN=FOXP2 PE=1 SV=2	FOXP2	79.918	1.5	1	1	1	1	0
Biological Process	GO:0010001	4	glial cell differentiation	2.51	0.000700218	P00441	Superoxide dismutase [Cu-Zn] OS=Homo sapiens OX=9606 GN=SOD1 PE=1 SV=2	SOD1	15.936	0	0	0	0	0	0
Biological Process	GO:0090132	3	epithelium migration	2.29	0.00065101	P55290	Cadherin-13 OS=Homo sapiens OX=9606 GN=CDH13 PE=1 SV=1	CDH13	78.286	0	0	0	0	0	0
Biological Process	GO:0090132	3	epithelium migration	2.29	0.00065101	Q9Y3M8	StAR-related lipid transfer protein 13 OS=Homo sapiens OX=9606 GN=STARD13 PE=1 SV=2	STARD13	124.97	0	0	0	0	0	0
Biological Process	GO:0090132	3	epithelium migration	2.29	0.00065101	Q04695	Keratin, type I cytoskeletal 17 OS=Homo sapiens OX=9606 GN=KRT17 PE=1 SV=2	KRT17	48.105	32.6	5	10	5	5	28013000
Biological Process	GO:0061515	4	myeloid cell development	4.2	0.000617826	P68871	Hemoglobin subunit beta OS=Homo sapiens OX=9606 GN=HBB PE=1 SV=2	HBB	15.998	71.4	22	9	4	9	3143200000
Biological Process	GO:0061515	4	myeloid cell development	4.2	0.000617826	P69905	Hemoglobin subunit alpha OS=Homo sapiens OX=9606 GN=HBA2 PE=1 SV=2	HBA2	15.257	57.7	20	6	6	6	1898500000
Biological Process	GO:0061515	4	myeloid cell development	4.2	0.000617826	Q15648	Mediator of RNA polymerase II transcription subunit 1 OS=Homo sapiens OX=9606 GN=MED1 PE=1 SV=4	MED1	168.48	0	0	0	0	0	0
Biological Process	GO:0061515	4	myeloid cell development	4.2	0.000617826	Q8IZF2	Adhesion G protein-coupled receptor F5 OS=Homo sapiens OX=9606 GN=ADGRF5 PE=1 SV=3	ADGRF5	149.46	0	0	0	0	0	0
Biological Process	GO:0061515	4	myeloid cell development	4.2	0.000617826	P07738	Bisphosphoglycerate mutase OS=Homo sapiens OX=9606 GN=BPGM PE=1 SV=2	BPGM	30.005	0	0	0	0	0	0
Biological Process	GO:2000910	7	negative regulation of sterol import	39.91	0.000626239	P02652	Apolipoprotein A-II OS=Homo sapiens OX=9606 GN=APOA2 PE=1 SV=1	APOA2	11.175	19	7	3	3	3	7512000000
Biological Process	GO:2000910	7	negative regulation of sterol import	39.91	0.000626239	P02656	Apolipoprotein C-III OS=Homo sapiens OX=9606 GN=APOC3 PE=1 SV=1	APOC3	10.852	0	0	0	0	0	0
Biological Process	GO:0070488	6	neutrophil aggregation	39.91	0.000626239	P05109	Protein S100-A8 OS=Homo sapiens OX=9606 GN=S100A8 PE=1 SV=1	S100A8	10.834	0	0	0	0	0	0
Biological Process	GO:0070488	6	neutrophil aggregation	39.91	0.000626239	P06702	Protein S100-A9 OS=Homo sapiens OX=9606 GN=S100A9 PE=1 SV=1	S100A9	13.242	43	4	3	3	3	31021000
Biological Process	GO:0006881	4	extracellular sequestering of iron ion	39.91	0.000626239	P02787	Serotransferrin OS=Homo sapiens OX=9606 GN=TF PE=1 SV=4	TF	77.049	60.5	160	43	43	43	50131000000
Biological Process	GO:0006881	4	extracellular sequestering of iron ion	39.91	0.000626239	P02788	Lactotransferrin OS=Homo sapiens OX=9606 GN=LTF PE=1 SV=6	LTF	78.181	16.3	11	9	9	9	133970000
Biological Process	GO:0033214	5	siderophore-dependent iron import into cell	39.91	0.000626239	P02787	Serotransferrin OS=Homo sapiens OX=9606 GN=TF PE=1 SV=4	TF	77.049	60.5	160	43	43	43	50131000000
Biological Process	GO:0033214	5	siderophore-dependent iron import into cell	39.91	0.000626239	P02788	Lactotransferrin OS=Homo sapiens OX=9606 GN=LTF PE=1 SV=6	LTF	78.181	16.3	11	9	9	9	133970000
Biological Process	GO:0021589	3	cerebellum structural organization	39.91	0.000626239	P11021	Endoplasmic reticulum chaperone BiP OS=Homo sapiens OX=9606 GN=HSPA5 PE=1 SV=2	HSPA5	72.332	0	0	0	0	0	0
Biological Process	GO:0021589	3	cerebellum structural organization	39.91	0.000626239	O75553	Disabled homolog 1 OS=Homo sapiens OX=9606 GN=DAB1 PE=1 SV=3	DAB1	63.774	0	0	0	0	0	0
Biological Process	GO:0021577	3	hindbrain structural organization	39.91	0.000626239	P11021	Endoplasmic reticulum chaperone BiP OS=Homo sapiens OX=9606 GN=HSPA5 PE=1 SV=2	HSPA5	72.332	0	0	0	0	0	0
Biological Process	GO:0021577	3	hindbrain structural organization	39.91	0.000626239	O75553	Disabled homolog 1 OS=Homo sapiens OX=9606 GN=DAB1 PE=1 SV=3	DAB1	63.774	0	0	0	0	0	0
Biological Process	GO:0060621	8	negative regulation of cholesterol import	39.91	0.000626239	P02652	Apolipoprotein A-II OS=Homo sapiens OX=9606 GN=APOA2 PE=1 SV=1	APOA2	11.175	19	7	3	3	3	7512000000
Biological Process	GO:0060621	8	negative regulation of cholesterol import	39.91	0.000626239	P02656	Apolipoprotein C-III OS=Homo sapiens OX=9606 GN=APOC3 PE=1 SV=1	APOC3	10.852	0	0	0	0	0	0
Biological Process	GO:0001568	3	blood vessel development	1.96	0.000635818	P01019	Angiotensinogen OS=Homo sapiens OX=9606 GN=AGT PE=1 SV=3	AGT	53.154	7.6	3	3	3	3	91548000
Biological Process	GO:0001568	3	blood vessel development	1.96	0.000635818	P05090	Apolipoprotein D OS=Homo sapiens OX=9606 GN=APOD PE=1 SV=1	APOD	21.275	25.9	14	4	4	4	463060000
Biological Process	GO:0001568	3	blood vessel development	1.96	0.000635818	P05556	Integrin beta-1 OS=Homo sapiens OX=9606 GN=ITGB1 PE=1 SV=2	ITGB1	88.414	0	0	0	0	0	0
Biological Process	GO:0001568	3	blood vessel development	1.96	0.000635818	P06576	ATP synthase subunit beta, mitochondrial OS=Homo sapiens OX=9606 GN=ATP5F1B PE=1 SV=3	ATP5F1B	56.559	0	0	0	0	0	0
Biological Process	GO:0061515	4	myeloid cell development	4.2	0.000617826	P07355	Annexin A2 OS=Homo sapiens OX=9606 GN=ANXA2 PE=1 SV=2	ANXA2	38.604	15.3	4	4	4	4	8350100
Biological Process	GO:0001568	3	blood vessel development	1.96	0.000635818	P07355	Annexin A2 OS=Homo sapiens OX=9606 GN=ANXA2 PE=1 SV=2	ANXA2	38.604	15.3	4	4	4	4	8350100
Biological Process	GO:0061515	4	myeloid cell development	4.2	0.000617826	P07333	Macrophage colony-stimulating factor 1 receptor OS=Homo sapiens OX=9606 GN=CSF1R PE=1 SV=2	CSF1R	107.98	2.2	2	2	2	2	24589000
Biological Process	GO:0009966	4	regulation of signal transduction	1.31	0.000596041	Q13275	Semaphorin-3F OS=Homo sapiens OX=9606 GN=SEMA3F PE=2 SV=2	SEMA3F	88.38	2.7	1	1	1	1	0
Biological Process	GO:0009966	4	regulation of signal transduction	1.31	0.000596041	Q9UIV8	Serpin B13 OS=Homo sapiens OX=9606 GN=SERPINB13 PE=1 SV=2	SERPINB13	44.276	0	0	0	0	0	0
Biological Process	GO:0009966	4	regulation of signal transduction	1.31	0.000596041	Q9Y261	Hepatocyte nuclear factor 3-beta OS=Homo sapiens OX=9606 GN=FOXA2 PE=1 SV=1	FOXA2	48.306	0	0	0	0	0	0
Biological Process	GO:0009966	4	regulation of signal transduction	1.31	0.000596041	Q9Y3M8	StAR-related lipid transfer protein 13 OS=Homo sapiens OX=9606 GN=STARD13 PE=1 SV=2	STARD13	124.97	0	0	0	0	0	0
Biological Process	GO:0009966	4	regulation of signal transduction	1.31	0.000596041	O75340	Programmed cell death protein 6 OS=Homo sapiens OX=9606 GN=PDCD6 PE=1 SV=1	PDCD6	21.868	0	0	0	0	0	0
Biological Process	GO:0009966	4	regulation of signal transduction	1.31	0.000596041	O75553	Disabled homolog 1 OS=Homo sapiens OX=9606 GN=DAB1 PE=1 SV=3	DAB1	63.774	0	0	0	0	0	0
Biological Process	GO:0009966	4	regulation of signal transduction	1.31	0.000596041	P01033	Metalloproteinase inhibitor 1 OS=Homo sapiens OX=9606 GN=TIMP1 PE=1 SV=1	TIMP1	23.171	12.1	1	2	2	2	17139000
Biological Process	GO:0009966	4	regulation of signal transduction	1.31	0.000596041	P13598	Intercellular adhesion molecule 2 OS=Homo sapiens OX=9606 GN=ICAM2 PE=1 SV=2	ICAM2	30.654	0	0	0	0	0	0
Biological Process	GO:0009966	4	regulation of signal transduction	1.31	0.000596041	P48764	Sodium/hydrogen exchanger 3 OS=Homo sapiens OX=9606 GN=SLC9A3 PE=1 SV=2	SLC9A3	92.853	0	0	0	0	0	0
Biological Process	GO:0009966	4	regulation of signal transduction	1.31	0.000596041	P52566	Rho GDP-dissociation inhibitor 2 OS=Homo sapiens OX=9606 GN=ARHGDIB PE=1 SV=3	ARHGDIB	22.988	0	0	0	0	0	0
Biological Process	GO:0009966	4	regulation of signal transduction	1.31	0.000596041	P55290	Cadherin-13 OS=Homo sapiens OX=9606 GN=CDH13 PE=1 SV=1	CDH13	78.286	0	0	0	0	0	0
Biological Process	GO:0009966	4	regulation of signal transduction	1.31	0.000596041	Q02763	Angiopoietin-1 receptor OS=Homo sapiens OX=9606 GN=TEK PE=1 SV=2	TEK	125.83	0	0	0	0	0	0
Biological Process	GO:0009966	4	regulation of signal transduction	1.31	0.000596041	Q07954	Prolow-density lipoprotein receptor-related protein 1 OS=Homo sapiens OX=9606 GN=LRP1 PE=1 SV=2	LRP1	504.6	0	0	0	0	0	0
Biological Process	GO:0009966	4	regulation of signal transduction	1.31	0.000596041	Q13573	SNW domain-containing protein 1 OS=Homo sapiens OX=9606 GN=SNW1 PE=1 SV=1	SNW1	61.494	0	0	0	0	0	0
Biological Process	GO:0009966	4	regulation of signal transduction	1.31	0.000596041	Q9BZF9	Uveal autoantigen with coiled-coil domains and ankyrin repeats OS=Homo sapiens OX=9606 GN=UACA PE=1 SV=2	UACA	162.5	0	0	0	0	0	0
Biological Process	GO:0009966	4	regulation of signal transduction	1.31	0.000596041	P00746	Complement factor D OS=Homo sapiens OX=9606 GN=CFD PE=1 SV=5	CFD	27.033	0	0	0	0	0	0
Biological Process	GO:0009966	4	regulation of signal transduction	1.31	0.000596041	P0C0L4	Complement C4-A OS=Homo sapiens OX=9606 GN=C4A PE=1 SV=2	C4A	192.78	0	0	0	0	0	0
Biological Process	GO:0009966	4	regulation of signal transduction	1.31	0.000596041	P19022	Cadherin-2 OS=Homo sapiens OX=9606 GN=CDH2 PE=1 SV=4	CDH2	99.808	0	0	0	0	0	0
Biological Process	GO:0009966	4	regulation of signal transduction	1.31	0.000596041	P98174	FYVE, RhoGEF and PH domain-containing protein 1 OS=Homo sapiens OX=9606 GN=FGD1 PE=1 SV=2	FGD1	106.56	0	0	0	0	0	0
Biological Process	GO:0009966	4	regulation of signal transduction	1.31	0.000596041	Q6IQ55	Tau-tubulin kinase 2 OS=Homo sapiens OX=9606 GN=TTBK2 PE=1 SV=2	TTBK2	137.41	1.1	1	1	1	1	0
Biological Process	GO:0009966	4	regulation of signal transduction	1.31	0.000596041	Q8IWV7	E3 ubiquitin-protein ligase UBR1 OS=Homo sapiens OX=9606 GN=UBR1 PE=1 SV=1	UBR1	200.21	0	0	0	0	0	0
Biological Process	GO:0009966	4	regulation of signal transduction	1.31	0.000596041	Q96KB5	Lymphokine-activated killer T-cell-originated protein kinase OS=Homo sapiens OX=9606 GN=PBK PE=1 SV=3	PBK	36.085	0	0	0	0	0	0
Biological Process	GO:0009966	4	regulation of signal transduction	1.31	0.000596041	Q9H4G4	Golgi-associated plant pathogenesis-related protein 1 OS=Homo sapiens OX=9606 GN=GLIPR2 PE=1 SV=3	GLIPR2	17.218	0	0	0	0	0	0
Biological Process	GO:0009966	4	regulation of signal transduction	1.31	0.000596041	Q96QA5	Gasdermin-A OS=Homo sapiens OX=9606 GN=GSDMA PE=1 SV=4	GSDMA	49.364	0	0	0	0	0	0
Biological Process	GO:0061515	4	myeloid cell development	4.2	0.000617826	P02042	Hemoglobin subunit delta OS=Homo sapiens OX=9606 GN=HBD PE=1 SV=2	HBD	16.055	41.5	2	6	1	1	26357000
Biological Process	GO:0001568	3	blood vessel development	1.96	0.000635818	P08238	Heat shock protein HSP 90-beta OS=Homo sapiens OX=9606 GN=HSP90AB1 PE=1 SV=4	HSP90AB1	83.263	0	0	0	0	0	0
Biological Process	GO:0001568	3	blood vessel development	1.96	0.000635818	P08697	Alpha-2-antiplasmin OS=Homo sapiens OX=9606 GN=SERPINF2 PE=1 SV=3	SERPINF2	54.565	17.9	7	6	6	6	283750000
Biological Process	GO:0001568	3	blood vessel development	1.96	0.000635818	P09601	Heme oxygenase 1 OS=Homo sapiens OX=9606 GN=HMOX1 PE=1 SV=1	HMOX1	32.818	0	0	0	0	0	0
Biological Process	GO:0010634	5	positive regulation of epithelial cell migration	2.74	0.000648226	P16885	1-phosphatidylinositol 4,5-bisphosphate phosphodiesterase gamma-2 OS=Homo sapiens OX=9606 GN=PLCG2 PE=1 SV=4	PLCG2	147.87	0	0	0	0	0	0
Biological Process	GO:0010634	5	positive regulation of epithelial cell migration	2.74	0.000648226	P25705	ATP synthase subunit alpha, mitochondrial OS=Homo sapiens OX=9606 GN=ATP5F1A PE=1 SV=1	ATP5F1A	59.75	0	0	0	0	0	0
Biological Process	GO:0010634	5	positive regulation of epithelial cell migration	2.74	0.000648226	P80108	Phosphatidylinositol-glycan-specific phospholipase D OS=Homo sapiens OX=9606 GN=GPLD1 PE=1 SV=3	GPLD1	92.335	7.7	5	5	5	5	109680000
Biological Process	GO:0010634	5	positive regulation of epithelial cell migration	2.74	0.000648226	O75340	Programmed cell death protein 6 OS=Homo sapiens OX=9606 GN=PDCD6 PE=1 SV=1	PDCD6	21.868	0	0	0	0	0	0
Biological Process	GO:0010634	5	positive regulation of epithelial cell migration	2.74	0.000648226	Q02763	Angiopoietin-1 receptor OS=Homo sapiens OX=9606 GN=TEK PE=1 SV=2	TEK	125.83	0	0	0	0	0	0
Biological Process	GO:0010634	5	positive regulation of epithelial cell migration	2.74	0.000648226	Q9H4G4	Golgi-associated plant pathogenesis-related protein 1 OS=Homo sapiens OX=9606 GN=GLIPR2 PE=1 SV=3	GLIPR2	17.218	0	0	0	0	0	0
Biological Process	GO:0010634	5	positive regulation of epithelial cell migration	2.74	0.000648226	Q8N1I0	Dedicator of cytokinesis protein 4 OS=Homo sapiens OX=9606 GN=DOCK4 PE=1 SV=3	DOCK4	225.2	0.5	1	1	1	1	0
Biological Process	GO:0090132	3	epithelium migration	2.29	0.00065101	O15144	Actin-related protein 2/3 complex subunit 2 OS=Homo sapiens OX=9606 GN=ARPC2 PE=1 SV=1	ARPC2	34.333	0	0	0	0	0	0
Biological Process	GO:0090132	3	epithelium migration	2.29	0.00065101	P00533	Epidermal growth factor receptor OS=Homo sapiens OX=9606 GN=EGFR PE=1 SV=2	EGFR	134.28	0	0	0	0	0	0
Biological Process	GO:0090132	3	epithelium migration	2.29	0.00065101	P02647	Apolipoprotein A-I OS=Homo sapiens OX=9606 GN=APOA1 PE=1 SV=1	APOA1	30.777	20.6	5	5	5	5	76295000
Biological Process	GO:0090132	3	epithelium migration	2.29	0.00065101	P05556	Integrin beta-1 OS=Homo sapiens OX=9606 GN=ITGB1 PE=1 SV=2	ITGB1	88.414	0	0	0	0	0	0
Biological Process	GO:0090132	3	epithelium migration	2.29	0.00065101	P07333	Macrophage colony-stimulating factor 1 receptor OS=Homo sapiens OX=9606 GN=CSF1R PE=1 SV=2	CSF1R	107.98	2.2	2	2	2	2	24589000
Biological Process	GO:0090132	3	epithelium migration	2.29	0.00065101	P07384	Calpain-1 catalytic subunit OS=Homo sapiens OX=9606 GN=CAPN1 PE=1 SV=1	CAPN1	81.889	0	0	0	0	0	0
Biological Process	GO:0090132	3	epithelium migration	2.29	0.00065101	P08779	Keratin, type I cytoskeletal 16 OS=Homo sapiens OX=9606 GN=KRT16 PE=1 SV=4	KRT16	51.267	33	9	16	7	7	65846000
Biological Process	GO:0090132	3	epithelium migration	2.29	0.00065101	P16885	1-phosphatidylinositol 4,5-bisphosphate phosphodiesterase gamma-2 OS=Homo sapiens OX=9606 GN=PLCG2 PE=1 SV=4	PLCG2	147.87	0	0	0	0	0	0
Biological Process	GO:0090132	3	epithelium migration	2.29	0.00065101	P19012	Keratin, type I cytoskeletal 15 OS=Homo sapiens OX=9606 GN=KRT15 PE=1 SV=3	KRT15	49.211	0	0	0	0	0	0
Biological Process	GO:0090132	3	epithelium migration	2.29	0.00065101	P27487	Dipeptidyl peptidase 4 OS=Homo sapiens OX=9606 GN=DPP4 PE=1 SV=2	DPP4	88.278	15	7	8	8	8	79452000
Biological Process	GO:0090132	3	epithelium migration	2.29	0.00065101	P35527	Keratin, type I cytoskeletal 9 OS=Homo sapiens OX=9606 GN=KRT9 PE=1 SV=3	KRT9	62.064	63.6	163	44	44	44	9025200000
Biological Process	GO:0090132	3	epithelium migration	2.29	0.00065101	P35579	Myosin-9 OS=Homo sapiens OX=9606 GN=MYH9 PE=1 SV=4	MYH9	226.53	1.8	2	2	2	2	2939500
Biological Process	GO:0090132	3	epithelium migration	2.29	0.00065101	P35908	Keratin, type II cytoskeletal 2 epidermal OS=Homo sapiens OX=9606 GN=KRT2 PE=1 SV=2	KRT2	65.432	76.8	101	48	35	44	4005200000
Biological Process	GO:0090132	3	epithelium migration	2.29	0.00065101	P47756	F-actin-capping protein subunit beta OS=Homo sapiens OX=9606 GN=CAPZB PE=1 SV=5	CAPZB	30.628	0	0	0	0	0	0
Biological Process	GO:0090132	3	epithelium migration	2.29	0.00065101	Q05193	Dynamin-1 OS=Homo sapiens OX=9606 GN=DNM1 PE=1 SV=2	DNM1	97.407	0	0	0	0	0	0
Biological Process	GO:0090132	3	epithelium migration	2.29	0.00065101	P80108	Phosphatidylinositol-glycan-specific phospholipase D OS=Homo sapiens OX=9606 GN=GPLD1 PE=1 SV=3	GPLD1	92.335	7.7	5	5	5	5	109680000
Biological Process	GO:0010634	5	positive regulation of epithelial cell migration	2.74	0.000648226	P09601	Heme oxygenase 1 OS=Homo sapiens OX=9606 GN=HMOX1 PE=1 SV=1	HMOX1	32.818	0	0	0	0	0	0
Biological Process	GO:0010634	5	positive regulation of epithelial cell migration	2.74	0.000648226	P06576	ATP synthase subunit beta, mitochondrial OS=Homo sapiens OX=9606 GN=ATP5F1B PE=1 SV=3	ATP5F1B	56.559	0	0	0	0	0	0
Biological Process	GO:0010634	5	positive regulation of epithelial cell migration	2.74	0.000648226	P06396	Gelsolin OS=Homo sapiens OX=9606 GN=GSN PE=1 SV=1	GSN	85.696	0	0	0	0	0	0
Biological Process	GO:0010634	5	positive regulation of epithelial cell migration	2.74	0.000648226	P04792	Heat shock protein beta-1 OS=Homo sapiens OX=9606 GN=HSPB1 PE=1 SV=2	HSPB1	22.782	7.8	1	1	1	1	1730200
Biological Process	GO:0001568	3	blood vessel development	1.96	0.000635818	P09619	Platelet-derived growth factor receptor beta OS=Homo sapiens OX=9606 GN=PDGFRB PE=1 SV=1	PDGFRB	123.97	2.9	3	2	2	2	4182400
Biological Process	GO:0001568	3	blood vessel development	1.96	0.000635818	P15291	Beta-1,4-galactosyltransferase 1 OS=Homo sapiens OX=9606 GN=B4GALT1 PE=1 SV=5	B4GALT1	43.92	0	0	0	0	0	0
Biological Process	GO:0001568	3	blood vessel development	1.96	0.000635818	P16070	CD44 antigen OS=Homo sapiens OX=9606 GN=CD44 PE=1 SV=3	CD44	81.537	3	2	2	2	2	118550000
Biological Process	GO:0001568	3	blood vessel development	1.96	0.000635818	P17813	Endoglin OS=Homo sapiens OX=9606 GN=ENG PE=1 SV=2	ENG	70.577	0	0	0	0	0	0
Biological Process	GO:0001568	3	blood vessel development	1.96	0.000635818	P21333	Filamin-A OS=Homo sapiens OX=9606 GN=FLNA PE=1 SV=4	FLNA	280.74	0	0	0	0	0	0
Biological Process	GO:0001568	3	blood vessel development	1.96	0.000635818	P31151	Protein S100-A7 OS=Homo sapiens OX=9606 GN=S100A7 PE=1 SV=4	S100A7	11.471	14.9	5	3	3	3	18159000
Biological Process	GO:0001568	3	blood vessel development	1.96	0.000635818	P35579	Myosin-9 OS=Homo sapiens OX=9606 GN=MYH9 PE=1 SV=4	MYH9	226.53	1.8	2	2	2	2	2939500
Biological Process	GO:0001568	3	blood vessel development	1.96	0.000635818	P43121	Cell surface glycoprotein MUC18 OS=Homo sapiens OX=9606 GN=MCAM PE=1 SV=2	MCAM	71.607	3.4	1	1	1	1	10856000
Biological Process	GO:0001568	3	blood vessel development	1.96	0.000635818	P63244	Receptor of activated protein C kinase 1 OS=Homo sapiens OX=9606 GN=RACK1 PE=1 SV=3	RACK1	35.076	0	0	0	0	0	0
Biological Process	GO:0001568	3	blood vessel development	1.96	0.000635818	P80108	Phosphatidylinositol-glycan-specific phospholipase D OS=Homo sapiens OX=9606 GN=GPLD1 PE=1 SV=3	GPLD1	92.335	7.7	5	5	5	5	109680000
Biological Process	GO:0001568	3	blood vessel development	1.96	0.000635818	Q12913	Receptor-type tyrosine-protein phosphatase eta OS=Homo sapiens OX=9606 GN=PTPRJ PE=1 SV=3	PTPRJ	145.94	2.7	3	3	3	3	26199000
Biological Process	GO:1903532	5	positive regulation of secretion by cell	1.93	0.000584623	P08571	Monocyte differentiation antigen CD14 OS=Homo sapiens OX=9606 GN=CD14 PE=1 SV=2	CD14	40.076	6.9	4	2	2	2	41719000
Biological Process	GO:0001568	3	blood vessel development	1.96	0.000635818	Q15648	Mediator of RNA polymerase II transcription subunit 1 OS=Homo sapiens OX=9606 GN=MED1 PE=1 SV=4	MED1	168.48	0	0	0	0	0	0
Biological Process	GO:0001568	3	blood vessel development	1.96	0.000635818	Q86SG5	Protein S100-A7A OS=Homo sapiens OX=9606 GN=S100A7A PE=1 SV=3	S100A7A	11.305	0	0	0	0	0	0
Biological Process	GO:0001568	3	blood vessel development	1.96	0.000635818	Q8IZF2	Adhesion G protein-coupled receptor F5 OS=Homo sapiens OX=9606 GN=ADGRF5 PE=1 SV=3	ADGRF5	149.46	0	0	0	0	0	0
Biological Process	GO:0001568	3	blood vessel development	1.96	0.000635818	P55290	Cadherin-13 OS=Homo sapiens OX=9606 GN=CDH13 PE=1 SV=1	CDH13	78.286	0	0	0	0	0	0
Biological Process	GO:0001568	3	blood vessel development	1.96	0.000635818	Q02763	Angiopoietin-1 receptor OS=Homo sapiens OX=9606 GN=TEK PE=1 SV=2	TEK	125.83	0	0	0	0	0	0
Biological Process	GO:0001568	3	blood vessel development	1.96	0.000635818	Q07954	Prolow-density lipoprotein receptor-related protein 1 OS=Homo sapiens OX=9606 GN=LRP1 PE=1 SV=2	LRP1	504.6	0	0	0	0	0	0
Biological Process	GO:0001568	3	blood vessel development	1.96	0.000635818	Q9UIQ6	Leucyl-cystinyl aminopeptidase OS=Homo sapiens OX=9606 GN=LNPEP PE=1 SV=3	LNPEP	117.35	0	0	0	0	0	0
Biological Process	GO:0001568	3	blood vessel development	1.96	0.000635818	P19022	Cadherin-2 OS=Homo sapiens OX=9606 GN=CDH2 PE=1 SV=4	CDH2	99.808	0	0	0	0	0	0
Biological Process	GO:0001568	3	blood vessel development	1.96	0.000635818	Q07075	Glutamyl aminopeptidase OS=Homo sapiens OX=9606 GN=ENPEP PE=1 SV=3	ENPEP	109.24	0	0	0	0	0	0
Biological Process	GO:0010634	5	positive regulation of epithelial cell migration	2.74	0.000648226	O15195	Villin-like protein OS=Homo sapiens OX=9606 GN=VILL PE=1 SV=3	VILL	95.906	3.4	2	2	2	2	17286000
Biological Process	GO:0010634	5	positive regulation of epithelial cell migration	2.74	0.000648226	P01019	Angiotensinogen OS=Homo sapiens OX=9606 GN=AGT PE=1 SV=3	AGT	53.154	7.6	3	3	3	3	91548000
Biological Process	GO:0010634	5	positive regulation of epithelial cell migration	2.74	0.000648226	P04083	Annexin A1 OS=Homo sapiens OX=9606 GN=ANXA1 PE=1 SV=2	ANXA1	38.714	0	0	0	0	0	0
Biological Process	GO:0001568	3	blood vessel development	1.96	0.000635818	Q6UX71	Plexin domain-containing protein 2 OS=Homo sapiens OX=9606 GN=PLXDC2 PE=1 SV=1	PLXDC2	59.582	5.5	2	2	2	2	10832000
Biological Process	GO:1903532	5	positive regulation of secretion by cell	1.93	0.000584623	P07333	Macrophage colony-stimulating factor 1 receptor OS=Homo sapiens OX=9606 GN=CSF1R PE=1 SV=2	CSF1R	107.98	2.2	2	2	2	2	24589000
Biological Process	GO:1903532	5	positive regulation of secretion by cell	1.93	0.000584623	P06276	Cholinesterase OS=Homo sapiens OX=9606 GN=BCHE PE=1 SV=1	BCHE	68.417	5.1	2	2	2	2	90413000
Biological Process	GO:1903532	5	positive regulation of secretion by cell	1.93	0.000584623	P04406	Glyceraldehyde-3-phosphate dehydrogenase OS=Homo sapiens OX=9606 GN=GAPDH PE=1 SV=3	GAPDH	36.053	28.7	5	6	6	6	28325000
Biological Process	GO:0031348	5	negative regulation of defense response	2.44	0.000485045	Q02763	Angiopoietin-1 receptor OS=Homo sapiens OX=9606 GN=TEK PE=1 SV=2	TEK	125.83	0	0	0	0	0	0
Biological Process	GO:0031348	5	negative regulation of defense response	2.44	0.000485045	Q9BZF9	Uveal autoantigen with coiled-coil domains and ankyrin repeats OS=Homo sapiens OX=9606 GN=UACA PE=1 SV=2	UACA	162.5	0	0	0	0	0	0
Biological Process	GO:0031348	5	negative regulation of defense response	2.44	0.000485045	P00746	Complement factor D OS=Homo sapiens OX=9606 GN=CFD PE=1 SV=5	CFD	27.033	0	0	0	0	0	0
Biological Process	GO:0031348	5	negative regulation of defense response	2.44	0.000485045	Q96KB5	Lymphokine-activated killer T-cell-originated protein kinase OS=Homo sapiens OX=9606 GN=PBK PE=1 SV=3	PBK	36.085	0	0	0	0	0	0
Biological Process	GO:1902652	4	secondary alcohol metabolic process	3.33	0.000490449	O00204	Sulfotransferase 2B1 OS=Homo sapiens OX=9606 GN=SULT2B1 PE=1 SV=2	SULT2B1	41.307	0	0	0	0	0	0
Biological Process	GO:1902652	4	secondary alcohol metabolic process	3.33	0.000490449	P02647	Apolipoprotein A-I OS=Homo sapiens OX=9606 GN=APOA1 PE=1 SV=1	APOA1	30.777	20.6	5	5	5	5	76295000
Biological Process	GO:1902652	4	secondary alcohol metabolic process	3.33	0.000490449	P02652	Apolipoprotein A-II OS=Homo sapiens OX=9606 GN=APOA2 PE=1 SV=1	APOA2	11.175	19	7	3	3	3	7512000000
Biological Process	GO:1902652	4	secondary alcohol metabolic process	3.33	0.000490449	P02654	Apolipoprotein C-I OS=Homo sapiens OX=9606 GN=APOC1 PE=1 SV=1	APOC1	9.3318	34.9	3	3	3	3	164400000
Biological Process	GO:1902652	4	secondary alcohol metabolic process	3.33	0.000490449	P02656	Apolipoprotein C-III OS=Homo sapiens OX=9606 GN=APOC3 PE=1 SV=1	APOC3	10.852	0	0	0	0	0	0
Biological Process	GO:1902652	4	secondary alcohol metabolic process	3.33	0.000490449	P04040	Catalase OS=Homo sapiens OX=9606 GN=CAT PE=1 SV=3	CAT	59.755	8.7	2	2	2	2	7648000
Biological Process	GO:1902652	4	secondary alcohol metabolic process	3.33	0.000490449	P04180	Phosphatidylcholine-sterol acyltransferase OS=Homo sapiens OX=9606 GN=LCAT PE=1 SV=1	LCAT	49.577	23.9	9	7	7	7	281860000
Biological Process	GO:1902652	4	secondary alcohol metabolic process	3.33	0.000490449	P51659	Peroxisomal multifunctional enzyme type 2 OS=Homo sapiens OX=9606 GN=HSD17B4 PE=1 SV=3	HSD17B4	79.685	0	0	0	0	0	0
Biological Process	GO:1902652	4	secondary alcohol metabolic process	3.33	0.000490449	Q03426	Mevalonate kinase OS=Homo sapiens OX=9606 GN=MVK PE=1 SV=1	MVK	42.45	0	0	0	0	0	0
Biological Process	GO:1902652	4	secondary alcohol metabolic process	3.33	0.000490449	Q07954	Prolow-density lipoprotein receptor-related protein 1 OS=Homo sapiens OX=9606 GN=LRP1 PE=1 SV=2	LRP1	504.6	0	0	0	0	0	0
Biological Process	GO:1902652	4	secondary alcohol metabolic process	3.33	0.000490449	P11597	Cholesteryl ester transfer protein OS=Homo sapiens OX=9606 GN=CETP PE=1 SV=2	CETP	54.756	0	0	0	0	0	0
Biological Process	GO:0016052	4	carbohydrate catabolic process	3.33	0.000490449	P00338	L-lactate dehydrogenase A chain OS=Homo sapiens OX=9606 GN=LDHA PE=1 SV=2	LDHA	36.688	0	0	0	0	0	0
Biological Process	GO:0016052	4	carbohydrate catabolic process	3.33	0.000490449	P00558	Phosphoglycerate kinase 1 OS=Homo sapiens OX=9606 GN=PGK1 PE=1 SV=3	PGK1	44.614	0	0	0	0	0	0
Biological Process	GO:0016052	4	carbohydrate catabolic process	3.33	0.000490449	P04075	Fructose-bisphosphate aldolase A OS=Homo sapiens OX=9606 GN=ALDOA PE=1 SV=2	ALDOA	39.42	4.9	1	1	1	1	12992000
Biological Process	GO:0016052	4	carbohydrate catabolic process	3.33	0.000490449	P04406	Glyceraldehyde-3-phosphate dehydrogenase OS=Homo sapiens OX=9606 GN=GAPDH PE=1 SV=3	GAPDH	36.053	28.7	5	6	6	6	28325000
Biological Process	GO:0016052	4	carbohydrate catabolic process	3.33	0.000490449	P06733	Alpha-enolase OS=Homo sapiens OX=9606 GN=ENO1 PE=1 SV=2	ENO1	47.168	4.4	1	1	1	1	3345600
Biological Process	GO:0016052	4	carbohydrate catabolic process	3.33	0.000490449	P14618	Pyruvate kinase PKM OS=Homo sapiens OX=9606 GN=PKM PE=1 SV=4	PKM	57.936	0	0	0	0	0	0
Biological Process	GO:0016052	4	carbohydrate catabolic process	3.33	0.000490449	P15259	Phosphoglycerate mutase 2 OS=Homo sapiens OX=9606 GN=PGAM2 PE=1 SV=3	PGAM2	28.766	0	0	0	0	0	0
Biological Process	GO:0016052	4	carbohydrate catabolic process	3.33	0.000490449	P60174	Triosephosphate isomerase OS=Homo sapiens OX=9606 GN=TPI1 PE=1 SV=4	TPI1	26.669	0	0	0	0	0	0
Biological Process	GO:0031348	5	negative regulation of defense response	2.44	0.000485045	Q9UIV8	Serpin B13 OS=Homo sapiens OX=9606 GN=SERPINB13 PE=1 SV=2	SERPINB13	44.276	0	0	0	0	0	0
Biological Process	GO:0016052	4	carbohydrate catabolic process	3.33	0.000490449	Q01459	Di-N-acetylchitobiase OS=Homo sapiens OX=9606 GN=CTBS PE=1 SV=1	CTBS	43.759	11.2	3	3	3	3	48297000
Biological Process	GO:0031348	5	negative regulation of defense response	2.44	0.000485045	Q96P63	Serpin B12 OS=Homo sapiens OX=9606 GN=SERPINB12 PE=1 SV=1	SERPINB12	46.276	3	1	1	1	1	3836800
Biological Process	GO:0031348	5	negative regulation of defense response	2.44	0.000485045	P48594	Serpin B4 OS=Homo sapiens OX=9606 GN=SERPINB4 PE=1 SV=2	SERPINB4	44.853	0	0	0	0	0	0
Biological Process	GO:0030301	7	cholesterol transport	4.37	0.000470078	P02654	Apolipoprotein C-I OS=Homo sapiens OX=9606 GN=APOC1 PE=1 SV=1	APOC1	9.3318	34.9	3	3	3	3	164400000
Biological Process	GO:0030301	7	cholesterol transport	4.37	0.000470078	P02655	Apolipoprotein C-II OS=Homo sapiens OX=9606 GN=APOC2 PE=1 SV=1	APOC2	11.284	19.8	3	2	2	2	111850000
Biological Process	GO:0030301	7	cholesterol transport	4.37	0.000470078	P02656	Apolipoprotein C-III OS=Homo sapiens OX=9606 GN=APOC3 PE=1 SV=1	APOC3	10.852	0	0	0	0	0	0
Biological Process	GO:0030301	7	cholesterol transport	4.37	0.000470078	P04180	Phosphatidylcholine-sterol acyltransferase OS=Homo sapiens OX=9606 GN=LCAT PE=1 SV=1	LCAT	49.577	23.9	9	7	7	7	281860000
Biological Process	GO:0030301	7	cholesterol transport	4.37	0.000470078	O95445	Apolipoprotein M OS=Homo sapiens OX=9606 GN=APOM PE=1 SV=2	APOM	21.253	0	0	0	0	0	0
Biological Process	GO:0030301	7	cholesterol transport	4.37	0.000470078	P11597	Cholesteryl ester transfer protein OS=Homo sapiens OX=9606 GN=CETP PE=1 SV=2	CETP	54.756	0	0	0	0	0	0
Biological Process	GO:2000425	6	regulation of apoptotic cell clearance	4.99	0.000473964	P01024	Complement C3 OS=Homo sapiens OX=9606 GN=C3 PE=1 SV=2	C3	187.15	0	0	0	0	0	0
Biological Process	GO:2000425	6	regulation of apoptotic cell clearance	4.99	0.000473964	P0C0L5	Complement C4-B OS=Homo sapiens OX=9606 GN=C4B_2 PE=1 SV=2	C4B_2	192.75	2.9	4	3	3	3	50961000
Biological Process	GO:2000425	6	regulation of apoptotic cell clearance	4.99	0.000473964	Q15084	Protein disulfide-isomerase A6 OS=Homo sapiens OX=9606 GN=PDIA6 PE=1 SV=1	PDIA6	48.121	0	0	0	0	0	0
Biological Process	GO:2000425	6	regulation of apoptotic cell clearance	4.99	0.000473964	P06681	Complement C2 OS=Homo sapiens OX=9606 GN=C2 PE=1 SV=2	C2	83.267	0	0	0	0	0	0
Biological Process	GO:2000425	6	regulation of apoptotic cell clearance	4.99	0.000473964	P0C0L4	Complement C4-A OS=Homo sapiens OX=9606 GN=C4A PE=1 SV=2	C4A	192.78	0	0	0	0	0	0
Biological Process	GO:2000425	6	regulation of apoptotic cell clearance	4.99	0.000473964	P00751	Complement factor B OS=Homo sapiens OX=9606 GN=CFB PE=1 SV=2	CFB	85.532	22.3	13	12	12	12	416220000
Biological Process	GO:2000425	6	regulation of apoptotic cell clearance	4.99	0.000473964	Q8N1I0	Dedicator of cytokinesis protein 4 OS=Homo sapiens OX=9606 GN=DOCK4 PE=1 SV=3	DOCK4	225.2	0.5	1	1	1	1	0
Biological Process	GO:0031348	5	negative regulation of defense response	2.44	0.000485045	A8K2U0	Alpha-2-macroglobulin-like protein 1 OS=Homo sapiens OX=9606 GN=A2ML1 PE=1 SV=3	A2ML1	161.1	0	0	0	0	0	0
Biological Process	GO:0031348	5	negative regulation of defense response	2.44	0.000485045	P02647	Apolipoprotein A-I OS=Homo sapiens OX=9606 GN=APOA1 PE=1 SV=1	APOA1	30.777	20.6	5	5	5	5	76295000
Biological Process	GO:0031348	5	negative regulation of defense response	2.44	0.000485045	P04264	Keratin, type II cytoskeletal 1 OS=Homo sapiens OX=9606 GN=KRT1 PE=1 SV=6	KRT1	66.038	73.1	166	58	52	58	20880000000
Biological Process	GO:0031348	5	negative regulation of defense response	2.44	0.000485045	P05089	Arginase-1 OS=Homo sapiens OX=9606 GN=ARG1 PE=1 SV=2	ARG1	34.735	8.4	5	3	3	3	32997000
Biological Process	GO:0031348	5	negative regulation of defense response	2.44	0.000485045	P05090	Apolipoprotein D OS=Homo sapiens OX=9606 GN=APOD PE=1 SV=1	APOD	21.275	25.9	14	4	4	4	463060000
Biological Process	GO:0031348	5	negative regulation of defense response	2.44	0.000485045	P05155	Plasma protease C1 inhibitor OS=Homo sapiens OX=9606 GN=SERPING1 PE=1 SV=2	SERPING1	55.154	27.4	56	17	17	17	14711000000
Biological Process	GO:0031348	5	negative regulation of defense response	2.44	0.000485045	P09211	Glutathione S-transferase P OS=Homo sapiens OX=9606 GN=GSTP1 PE=1 SV=2	GSTP1	23.356	0	0	0	0	0	0
Biological Process	GO:0031348	5	negative regulation of defense response	2.44	0.000485045	P16070	CD44 antigen OS=Homo sapiens OX=9606 GN=CD44 PE=1 SV=3	CD44	81.537	3	2	2	2	2	118550000
Biological Process	GO:0031348	5	negative regulation of defense response	2.44	0.000485045	P29508	Serpin B3 OS=Homo sapiens OX=9606 GN=SERPINB3 PE=1 SV=2	SERPINB3	44.564	0	0	0	0	0	0
Biological Process	GO:0031348	5	negative regulation of defense response	2.44	0.000485045	P30740	Leukocyte elastase inhibitor OS=Homo sapiens OX=9606 GN=SERPINB1 PE=1 SV=1	SERPINB1	42.741	0	0	0	0	0	0
Biological Process	GO:0031348	5	negative regulation of defense response	2.44	0.000485045	Q03426	Mevalonate kinase OS=Homo sapiens OX=9606 GN=MVK PE=1 SV=1	MVK	42.45	0	0	0	0	0	0
Biological Process	GO:0030301	7	cholesterol transport	4.37	0.000470078	P02652	Apolipoprotein A-II OS=Homo sapiens OX=9606 GN=APOA2 PE=1 SV=1	APOA2	11.175	19	7	3	3	3	7512000000
Biological Process	GO:0016052	4	carbohydrate catabolic process	3.33	0.000490449	Q8TDY2	RB1-inducible coiled-coil protein 1 OS=Homo sapiens OX=9606 GN=RB1CC1 PE=1 SV=3	RB1CC1	183.09	0	0	0	0	0	0
Biological Process	GO:0019221	4	cytokine-mediated signaling pathway	1.81	0.000503925	P00441	Superoxide dismutase [Cu-Zn] OS=Homo sapiens OX=9606 GN=SOD1 PE=1 SV=2	SOD1	15.936	0	0	0	0	0	0
Biological Process	GO:0019221	4	cytokine-mediated signaling pathway	1.81	0.000503925	Q16658	Fascin OS=Homo sapiens OX=9606 GN=FSCN1 PE=1 SV=3	FSCN1	54.529	0	0	0	0	0	0
Biological Process	GO:0019221	4	cytokine-mediated signaling pathway	1.81	0.000503925	Q9NPH3	Interleukin-1 receptor accessory protein OS=Homo sapiens OX=9606 GN=IL1RAP PE=1 SV=2	IL1RAP	65.418	5.3	2	2	2	2	10635000
Biological Process	GO:0019221	4	cytokine-mediated signaling pathway	1.81	0.000503925	Q9NZH8	Interleukin-36 gamma OS=Homo sapiens OX=9606 GN=IL36G PE=1 SV=1	IL36G	18.721	10.7	1	1	1	1	0
Biological Process	GO:0019221	4	cytokine-mediated signaling pathway	1.81	0.000503925	P01033	Metalloproteinase inhibitor 1 OS=Homo sapiens OX=9606 GN=TIMP1 PE=1 SV=1	TIMP1	23.171	12.1	1	2	2	2	17139000
Biological Process	GO:0019221	4	cytokine-mediated signaling pathway	1.81	0.000503925	P13598	Intercellular adhesion molecule 2 OS=Homo sapiens OX=9606 GN=ICAM2 PE=1 SV=2	ICAM2	30.654	0	0	0	0	0	0
Biological Process	GO:0019221	4	cytokine-mediated signaling pathway	1.81	0.000503925	P61769	Beta-2-microglobulin OS=Homo sapiens OX=9606 GN=B2M PE=1 SV=1	B2M	13.714	8.4	1	1	1	1	13665000
Biological Process	GO:0019221	4	cytokine-mediated signaling pathway	1.81	0.000503925	Q01628	Interferon-induced transmembrane protein 3 OS=Homo sapiens OX=9606 GN=IFITM3 PE=1 SV=2	IFITM3	14.632	0	0	0	0	0	0
Biological Process	GO:0019221	4	cytokine-mediated signaling pathway	1.81	0.000503925	P00746	Complement factor D OS=Homo sapiens OX=9606 GN=CFD PE=1 SV=5	CFD	27.033	0	0	0	0	0	0
Biological Process	GO:0019221	4	cytokine-mediated signaling pathway	1.81	0.000503925	Q99650	Oncostatin-M-specific receptor subunit beta OS=Homo sapiens OX=9606 GN=OSMR PE=1 SV=1	OSMR	110.51	0	0	0	0	0	0
Biological Process	GO:0048821	5	erythrocyte development	5.84	0.000510365	P02042	Hemoglobin subunit delta OS=Homo sapiens OX=9606 GN=HBD PE=1 SV=2	HBD	16.055	41.5	2	6	1	1	26357000
Biological Process	GO:0048821	5	erythrocyte development	5.84	0.000510365	P68871	Hemoglobin subunit beta OS=Homo sapiens OX=9606 GN=HBB PE=1 SV=2	HBB	15.998	71.4	22	9	4	9	3143200000
Biological Process	GO:0048821	5	erythrocyte development	5.84	0.000510365	P69905	Hemoglobin subunit alpha OS=Homo sapiens OX=9606 GN=HBA2 PE=1 SV=2	HBA2	15.257	57.7	20	6	6	6	1898500000
Biological Process	GO:0048821	5	erythrocyte development	5.84	0.000510365	Q15648	Mediator of RNA polymerase II transcription subunit 1 OS=Homo sapiens OX=9606 GN=MED1 PE=1 SV=4	MED1	168.48	0	0	0	0	0	0
Biological Process	GO:0048821	5	erythrocyte development	5.84	0.000510365	Q8IZF2	Adhesion G protein-coupled receptor F5 OS=Homo sapiens OX=9606 GN=ADGRF5 PE=1 SV=3	ADGRF5	149.46	0	0	0	0	0	0
Biological Process	GO:0048821	5	erythrocyte development	5.84	0.000510365	P07738	Bisphosphoglycerate mutase OS=Homo sapiens OX=9606 GN=BPGM PE=1 SV=2	BPGM	30.005	0	0	0	0	0	0
Biological Process	GO:0043068	6	positive regulation of programmed cell death	1.74	0.000511947	O15195	Villin-like protein OS=Homo sapiens OX=9606 GN=VILL PE=1 SV=3	VILL	95.906	3.4	2	2	2	2	17286000
Biological Process	GO:0043068	6	positive regulation of programmed cell death	1.74	0.000511947	O75460	Serine/threonine-protein kinase/endoribonuclease IRE1 OS=Homo sapiens OX=9606 GN=ERN1 PE=1 SV=2	ERN1	109.73	0.9	2	1	1	1	118360000
Biological Process	GO:0043068	6	positive regulation of programmed cell death	1.74	0.000511947	P00338	L-lactate dehydrogenase A chain OS=Homo sapiens OX=9606 GN=LDHA PE=1 SV=2	LDHA	36.688	0	0	0	0	0	0
Biological Process	GO:0043068	6	positive regulation of programmed cell death	1.74	0.000511947	P00441	Superoxide dismutase [Cu-Zn] OS=Homo sapiens OX=9606 GN=SOD1 PE=1 SV=2	SOD1	15.936	0	0	0	0	0	0
Biological Process	GO:0043068	6	positive regulation of programmed cell death	1.74	0.000511947	P01019	Angiotensinogen OS=Homo sapiens OX=9606 GN=AGT PE=1 SV=3	AGT	53.154	7.6	3	3	3	3	91548000
Biological Process	GO:0043068	6	positive regulation of programmed cell death	1.74	0.000511947	P01042	Kininogen-1 OS=Homo sapiens OX=9606 GN=KNG1 PE=1 SV=2	KNG1	71.957	16.8	10	9	9	9	1803300000
Biological Process	GO:0043068	6	positive regulation of programmed cell death	1.74	0.000511947	P04083	Annexin A1 OS=Homo sapiens OX=9606 GN=ANXA1 PE=1 SV=2	ANXA1	38.714	0	0	0	0	0	0
Biological Process	GO:0043068	6	positive regulation of programmed cell death	1.74	0.000511947	P04406	Glyceraldehyde-3-phosphate dehydrogenase OS=Homo sapiens OX=9606 GN=GAPDH PE=1 SV=3	GAPDH	36.053	28.7	5	6	6	6	28325000
Biological Process	GO:0019221	4	cytokine-mediated signaling pathway	1.81	0.000503925	P80188	Neutrophil gelatinase-associated lipocalin OS=Homo sapiens OX=9606 GN=LCN2 PE=1 SV=2	LCN2	22.588	0	0	0	0	0	0
Biological Process	GO:0016052	4	carbohydrate catabolic process	3.33	0.000490449	P07738	Bisphosphoglycerate mutase OS=Homo sapiens OX=9606 GN=BPGM PE=1 SV=2	BPGM	30.005	0	0	0	0	0	0
Biological Process	GO:0019221	4	cytokine-mediated signaling pathway	1.81	0.000503925	P78417	Glutathione S-transferase omega-1 OS=Homo sapiens OX=9606 GN=GSTO1 PE=1 SV=2	GSTO1	27.566	0	0	0	0	0	0
Biological Process	GO:0019221	4	cytokine-mediated signaling pathway	1.81	0.000503925	P62937	Peptidyl-prolyl cis-trans isomerase A OS=Homo sapiens OX=9606 GN=PPIA PE=1 SV=2	PPIA	18.012	0	0	0	0	0	0
Biological Process	GO:0019221	4	cytokine-mediated signaling pathway	1.81	0.000503925	P04083	Annexin A1 OS=Homo sapiens OX=9606 GN=ANXA1 PE=1 SV=2	ANXA1	38.714	0	0	0	0	0	0
Biological Process	GO:0019221	4	cytokine-mediated signaling pathway	1.81	0.000503925	P05120	Plasminogen activator inhibitor 2 OS=Homo sapiens OX=9606 GN=SERPINB2 PE=1 SV=2	SERPINB2	46.596	0	0	0	0	0	0
Biological Process	GO:0019221	4	cytokine-mediated signaling pathway	1.81	0.000503925	P05362	Intercellular adhesion molecule 1 OS=Homo sapiens OX=9606 GN=ICAM1 PE=1 SV=2	ICAM1	57.825	0	0	0	0	0	0
Biological Process	GO:0019221	4	cytokine-mediated signaling pathway	1.81	0.000503925	P05556	Integrin beta-1 OS=Homo sapiens OX=9606 GN=ITGB1 PE=1 SV=2	ITGB1	88.414	0	0	0	0	0	0
Biological Process	GO:0019221	4	cytokine-mediated signaling pathway	1.81	0.000503925	P07333	Macrophage colony-stimulating factor 1 receptor OS=Homo sapiens OX=9606 GN=CSF1R PE=1 SV=2	CSF1R	107.98	2.2	2	2	2	2	24589000
Biological Process	GO:0019221	4	cytokine-mediated signaling pathway	1.81	0.000503925	P07355	Annexin A2 OS=Homo sapiens OX=9606 GN=ANXA2 PE=1 SV=2	ANXA2	38.604	15.3	4	4	4	4	8350100
Biological Process	GO:0019221	4	cytokine-mediated signaling pathway	1.81	0.000503925	P07359	Platelet glycoprotein Ib alpha chain OS=Homo sapiens OX=9606 GN=GP1BA PE=1 SV=2	GP1BA	71.539	0	0	0	0	0	0
Biological Process	GO:0019221	4	cytokine-mediated signaling pathway	1.81	0.000503925	P08238	Heat shock protein HSP 90-beta OS=Homo sapiens OX=9606 GN=HSP90AB1 PE=1 SV=4	HSP90AB1	83.263	0	0	0	0	0	0
Biological Process	GO:0019221	4	cytokine-mediated signaling pathway	1.81	0.000503925	P08670	Vimentin OS=Homo sapiens OX=9606 GN=VIM PE=1 SV=4	VIM	53.651	0	0	0	0	0	0
Biological Process	GO:0019221	4	cytokine-mediated signaling pathway	1.81	0.000503925	P09601	Heme oxygenase 1 OS=Homo sapiens OX=9606 GN=HMOX1 PE=1 SV=1	HMOX1	32.818	0	0	0	0	0	0
Biological Process	GO:0019221	4	cytokine-mediated signaling pathway	1.81	0.000503925	P62987	Ubiquitin-60S ribosomal protein L40 OS=Homo sapiens OX=9606 GN=UBA52 PE=1 SV=2	UBA52	14.728	39.1	7	6	6	6	90657000
Biological Process	GO:0019221	4	cytokine-mediated signaling pathway	1.81	0.000503925	P11142	Heat shock cognate 71 kDa protein OS=Homo sapiens OX=9606 GN=HSPA8 PE=1 SV=1	HSPA8	70.897	0	0	0	0	0	0
Biological Process	GO:0019221	4	cytokine-mediated signaling pathway	1.81	0.000503925	P14174	Macrophage migration inhibitory factor OS=Homo sapiens OX=9606 GN=MIF PE=1 SV=4	MIF	12.476	0	0	0	0	0	0
Biological Process	GO:0019221	4	cytokine-mediated signaling pathway	1.81	0.000503925	P16070	CD44 antigen OS=Homo sapiens OX=9606 GN=CD44 PE=1 SV=3	CD44	81.537	3	2	2	2	2	118550000
Biological Process	GO:0019221	4	cytokine-mediated signaling pathway	1.81	0.000503925	P18510	Interleukin-1 receptor antagonist protein OS=Homo sapiens OX=9606 GN=IL1RN PE=1 SV=1	IL1RN	20.055	0	0	0	0	0	0
Biological Process	GO:0019221	4	cytokine-mediated signaling pathway	1.81	0.000503925	P22735	Protein-glutamine gamma-glutamyltransferase K OS=Homo sapiens OX=9606 GN=TGM1 PE=1 SV=4	TGM1	89.786	3.3	2	2	2	2	11308000
Biological Process	GO:0019221	4	cytokine-mediated signaling pathway	1.81	0.000503925	P23470	Receptor-type tyrosine-protein phosphatase gamma OS=Homo sapiens OX=9606 GN=PTPRG PE=1 SV=4	PTPRG	162	1	1	1	1	1	5890900
Biological Process	GO:0019221	4	cytokine-mediated signaling pathway	1.81	0.000503925	P26992	Ciliary neurotrophic factor receptor subunit alpha OS=Homo sapiens OX=9606 GN=CNTFR PE=1 SV=2	CNTFR	40.633	3.5	1	1	1	1	4217500
Biological Process	GO:0019221	4	cytokine-mediated signaling pathway	1.81	0.000503925	P37837	Transaldolase OS=Homo sapiens OX=9606 GN=TALDO1 PE=1 SV=2	TALDO1	37.54	0	0	0	0	0	0
Biological Process	GO:0019221	4	cytokine-mediated signaling pathway	1.81	0.000503925	P38646	Stress-70 protein, mitochondrial OS=Homo sapiens OX=9606 GN=HSPA9 PE=1 SV=2	HSPA9	73.68	0	0	0	0	0	0
Biological Process	GO:0019221	4	cytokine-mediated signaling pathway	1.81	0.000503925	P42224	Signal transducer and activator of transcription 1-alpha/beta OS=Homo sapiens OX=9606 GN=STAT1 PE=1 SV=2	STAT1	87.334	0	0	0	0	0	0
Biological Process	GO:0019221	4	cytokine-mediated signaling pathway	1.81	0.000503925	P49662	Caspase-4 OS=Homo sapiens OX=9606 GN=CASP4 PE=1 SV=1	CASP4	43.262	4	6	1	1	1	29842000
Biological Process	GO:0019221	4	cytokine-mediated signaling pathway	1.81	0.000503925	P52907	F-actin-capping protein subunit alpha-1 OS=Homo sapiens OX=9606 GN=CAPZA1 PE=1 SV=3	CAPZA1	32.922	0	0	0	0	0	0
Biological Process	GO:0019221	4	cytokine-mediated signaling pathway	1.81	0.000503925	P63104	14-3-3 protein zeta/delta OS=Homo sapiens OX=9606 GN=YWHAZ PE=1 SV=1	YWHAZ	27.745	0	0	0	0	0	0
Biological Process	GO:0030301	7	cholesterol transport	4.37	0.000470078	P02647	Apolipoprotein A-I OS=Homo sapiens OX=9606 GN=APOA1 PE=1 SV=1	APOA1	30.777	20.6	5	5	5	5	76295000
Biological Process	GO:0071345	5	cellular response to cytokine stimulus	1.64	0.000456094	Q9Y4C1	Lysine-specific demethylase 3A OS=Homo sapiens OX=9606 GN=KDM3A PE=1 SV=4	KDM3A	147.34	1	1	1	1	1	33437000
Biological Process	GO:0071345	5	cellular response to cytokine stimulus	1.64	0.000456094	Q99650	Oncostatin-M-specific receptor subunit beta OS=Homo sapiens OX=9606 GN=OSMR PE=1 SV=1	OSMR	110.51	0	0	0	0	0	0
Biological Process	GO:0090130	2	tissue migration	2.32	0.000416987	P05556	Integrin beta-1 OS=Homo sapiens OX=9606 GN=ITGB1 PE=1 SV=2	ITGB1	88.414	0	0	0	0	0	0
Biological Process	GO:0090130	2	tissue migration	2.32	0.000416987	P07333	Macrophage colony-stimulating factor 1 receptor OS=Homo sapiens OX=9606 GN=CSF1R PE=1 SV=2	CSF1R	107.98	2.2	2	2	2	2	24589000
Biological Process	GO:0090130	2	tissue migration	2.32	0.000416987	P07384	Calpain-1 catalytic subunit OS=Homo sapiens OX=9606 GN=CAPN1 PE=1 SV=1	CAPN1	81.889	0	0	0	0	0	0
Biological Process	GO:0090130	2	tissue migration	2.32	0.000416987	P08779	Keratin, type I cytoskeletal 16 OS=Homo sapiens OX=9606 GN=KRT16 PE=1 SV=4	KRT16	51.267	33	9	16	7	7	65846000
Biological Process	GO:0090130	2	tissue migration	2.32	0.000416987	P16885	1-phosphatidylinositol 4,5-bisphosphate phosphodiesterase gamma-2 OS=Homo sapiens OX=9606 GN=PLCG2 PE=1 SV=4	PLCG2	147.87	0	0	0	0	0	0
Biological Process	GO:0090130	2	tissue migration	2.32	0.000416987	P19012	Keratin, type I cytoskeletal 15 OS=Homo sapiens OX=9606 GN=KRT15 PE=1 SV=3	KRT15	49.211	0	0	0	0	0	0
Biological Process	GO:0090130	2	tissue migration	2.32	0.000416987	P27487	Dipeptidyl peptidase 4 OS=Homo sapiens OX=9606 GN=DPP4 PE=1 SV=2	DPP4	88.278	15	7	8	8	8	79452000
Biological Process	GO:0090130	2	tissue migration	2.32	0.000416987	P35527	Keratin, type I cytoskeletal 9 OS=Homo sapiens OX=9606 GN=KRT9 PE=1 SV=3	KRT9	62.064	63.6	163	44	44	44	9025200000
Biological Process	GO:0090130	2	tissue migration	2.32	0.000416987	P35579	Myosin-9 OS=Homo sapiens OX=9606 GN=MYH9 PE=1 SV=4	MYH9	226.53	1.8	2	2	2	2	2939500
Biological Process	GO:0090130	2	tissue migration	2.32	0.000416987	P35908	Keratin, type II cytoskeletal 2 epidermal OS=Homo sapiens OX=9606 GN=KRT2 PE=1 SV=2	KRT2	65.432	76.8	101	48	35	44	4005200000
Biological Process	GO:0090130	2	tissue migration	2.32	0.000416987	P47756	F-actin-capping protein subunit beta OS=Homo sapiens OX=9606 GN=CAPZB PE=1 SV=5	CAPZB	30.628	0	0	0	0	0	0
Biological Process	GO:0090130	2	tissue migration	2.32	0.000416987	Q05193	Dynamin-1 OS=Homo sapiens OX=9606 GN=DNM1 PE=1 SV=2	DNM1	97.407	0	0	0	0	0	0
Biological Process	GO:0090130	2	tissue migration	2.32	0.000416987	P68133	Actin, alpha skeletal muscle OS=Homo sapiens OX=9606 GN=ACTA1 PE=1 SV=1	ACTA1	42.051	0	0	0	0	0	0
Biological Process	GO:0090130	2	tissue migration	2.32	0.000416987	P80108	Phosphatidylinositol-glycan-specific phospholipase D OS=Homo sapiens OX=9606 GN=GPLD1 PE=1 SV=3	GPLD1	92.335	7.7	5	5	5	5	109680000
Biological Process	GO:0090130	2	tissue migration	2.32	0.000416987	Q04695	Keratin, type I cytoskeletal 17 OS=Homo sapiens OX=9606 GN=KRT17 PE=1 SV=2	KRT17	48.105	32.6	5	10	5	5	28013000
Biological Process	GO:0090130	2	tissue migration	2.32	0.000416987	Q9Y3M8	StAR-related lipid transfer protein 13 OS=Homo sapiens OX=9606 GN=STARD13 PE=1 SV=2	STARD13	124.97	0	0	0	0	0	0
Biological Process	GO:0090130	2	tissue migration	2.32	0.000416987	P55290	Cadherin-13 OS=Homo sapiens OX=9606 GN=CDH13 PE=1 SV=1	CDH13	78.286	0	0	0	0	0	0
Biological Process	GO:0090130	2	tissue migration	2.32	0.000416987	P13646	Keratin, type I cytoskeletal 13 OS=Homo sapiens OX=9606 GN=KRT13 PE=1 SV=4	KRT13	49.588	6.6	1	2	1	1	681050
Biological Process	GO:0050853	6	B cell receptor signaling pathway	5.08	0.00042371	P01857	Immunoglobulin heavy constant gamma 1 OS=Homo sapiens OX=9606 GN=IGHG1 PE=1 SV=1	IGHG1	36.105	20.3	2	4	2	2	31089000
Biological Process	GO:0050853	6	B cell receptor signaling pathway	5.08	0.00042371	P01861	Immunoglobulin heavy constant gamma 4 OS=Homo sapiens OX=9606 GN=IGHG4 PE=1 SV=1	IGHG4	35.94	17.4	3	4	1	2	27336000
Biological Process	GO:0050853	6	B cell receptor signaling pathway	5.08	0.00042371	P0DOY3	Immunoglobulin lambda constant 3 OS=Homo sapiens OX=9606 GN=IGLC3 PE=1 SV=1	IGLC3	11.265	37.7	8	3	1	3	530400000
Biological Process	GO:0050853	6	B cell receptor signaling pathway	5.08	0.00042371	P16885	1-phosphatidylinositol 4,5-bisphosphate phosphodiesterase gamma-2 OS=Homo sapiens OX=9606 GN=PLCG2 PE=1 SV=4	PLCG2	147.87	0	0	0	0	0	0
Biological Process	GO:0050853	6	B cell receptor signaling pathway	5.08	0.00042371	P0CG04	Immunoglobulin lambda constant 1 OS=Homo sapiens OX=9606 GN=IGLC1 PE=1 SV=1	IGLC1	11.348	37.7	1	3	1	1	11841000
Biological Process	GO:0090130	2	tissue migration	2.32	0.000416987	P02647	Apolipoprotein A-I OS=Homo sapiens OX=9606 GN=APOA1 PE=1 SV=1	APOA1	30.777	20.6	5	5	5	5	76295000
Biological Process	GO:0050853	6	B cell receptor signaling pathway	5.08	0.00042371	P01859	Immunoglobulin heavy constant gamma 2 OS=Homo sapiens OX=9606 GN=IGHG2 PE=1 SV=2	IGHG2	35.9	24.5	4	4	2	4	304010000
Biological Process	GO:0090130	2	tissue migration	2.32	0.000416987	P00533	Epidermal growth factor receptor OS=Homo sapiens OX=9606 GN=EGFR PE=1 SV=2	EGFR	134.28	0	0	0	0	0	0
Biological Process	GO:0010896	6	regulation of triglyceride catabolic process	7.68	0.00041042	P80108	Phosphatidylinositol-glycan-specific phospholipase D OS=Homo sapiens OX=9606 GN=GPLD1 PE=1 SV=3	GPLD1	92.335	7.7	5	5	5	5	109680000
Biological Process	GO:0051851	4	modulation by host of symbiont process	3.66	0.000410095	P59666	Neutrophil defensin 3 OS=Homo sapiens OX=9606 GN=DEFA3 PE=1 SV=1	DEFA3	10.245	0	0	0	0	0	0
Biological Process	GO:0051851	4	modulation by host of symbiont process	3.66	0.000410095	P63244	Receptor of activated protein C kinase 1 OS=Homo sapiens OX=9606 GN=RACK1 PE=1 SV=3	RACK1	35.076	0	0	0	0	0	0
Biological Process	GO:0051851	4	modulation by host of symbiont process	3.66	0.000410095	Q13573	SNW domain-containing protein 1 OS=Homo sapiens OX=9606 GN=SNW1 PE=1 SV=1	SNW1	61.494	0	0	0	0	0	0
Biological Process	GO:0051851	4	modulation by host of symbiont process	3.66	0.000410095	P00746	Complement factor D OS=Homo sapiens OX=9606 GN=CFD PE=1 SV=5	CFD	27.033	0	0	0	0	0	0
Biological Process	GO:0046916	7	cellular transition metal ion homeostasis	3.66	0.000410095	P00441	Superoxide dismutase [Cu-Zn] OS=Homo sapiens OX=9606 GN=SOD1 PE=1 SV=2	SOD1	15.936	0	0	0	0	0	0
Biological Process	GO:0046916	7	cellular transition metal ion homeostasis	3.66	0.000410095	P00450	Ceruloplasmin OS=Homo sapiens OX=9606 GN=CP PE=1 SV=1	CP	122.2	22.9	25	17	17	17	892180000
Biological Process	GO:0046916	7	cellular transition metal ion homeostasis	3.66	0.000410095	P02787	Serotransferrin OS=Homo sapiens OX=9606 GN=TF PE=1 SV=4	TF	77.049	60.5	160	43	43	43	50131000000
Biological Process	GO:0046916	7	cellular transition metal ion homeostasis	3.66	0.000410095	P02788	Lactotransferrin OS=Homo sapiens OX=9606 GN=LTF PE=1 SV=6	LTF	78.181	16.3	11	9	9	9	133970000
Biological Process	GO:0046916	7	cellular transition metal ion homeostasis	3.66	0.000410095	P02790	Hemopexin OS=Homo sapiens OX=9606 GN=HPX PE=1 SV=2	HPX	51.676	63	99	20	20	20	81563000000
Biological Process	GO:0046916	7	cellular transition metal ion homeostasis	3.66	0.000410095	P05109	Protein S100-A8 OS=Homo sapiens OX=9606 GN=S100A8 PE=1 SV=1	S100A8	10.834	0	0	0	0	0	0
Biological Process	GO:0046916	7	cellular transition metal ion homeostasis	3.66	0.000410095	P06702	Protein S100-A9 OS=Homo sapiens OX=9606 GN=S100A9 PE=1 SV=1	S100A9	13.242	43	4	3	3	3	31021000
Biological Process	GO:0046916	7	cellular transition metal ion homeostasis	3.66	0.000410095	P09601	Heme oxygenase 1 OS=Homo sapiens OX=9606 GN=HMOX1 PE=1 SV=1	HMOX1	32.818	0	0	0	0	0	0
Biological Process	GO:0046916	7	cellular transition metal ion homeostasis	3.66	0.000410095	P28676	Grancalcin OS=Homo sapiens OX=9606 GN=GCA PE=1 SV=2	GCA	24.01	0	0	0	0	0	0
Biological Process	GO:0046916	7	cellular transition metal ion homeostasis	3.66	0.000410095	P80188	Neutrophil gelatinase-associated lipocalin OS=Homo sapiens OX=9606 GN=LCN2 PE=1 SV=2	LCN2	22.588	0	0	0	0	0	0
Biological Process	GO:0033197	4	response to vitamin E	7.68	0.00041042	P02763	Alpha-1-acid glycoprotein 1 OS=Homo sapiens OX=9606 GN=ORM1 PE=1 SV=2	ORM1	23.539	41.8	11	8	6	6	3742300000
Biological Process	GO:0033197	4	response to vitamin E	7.68	0.00041042	P04040	Catalase OS=Homo sapiens OX=9606 GN=CAT PE=1 SV=3	CAT	59.755	8.7	2	2	2	2	7648000
Biological Process	GO:0033197	4	response to vitamin E	7.68	0.00041042	P05089	Arginase-1 OS=Homo sapiens OX=9606 GN=ARG1 PE=1 SV=2	ARG1	34.735	8.4	5	3	3	3	32997000
Biological Process	GO:0033197	4	response to vitamin E	7.68	0.00041042	P14174	Macrophage migration inhibitory factor OS=Homo sapiens OX=9606 GN=MIF PE=1 SV=4	MIF	12.476	0	0	0	0	0	0
Biological Process	GO:0033197	4	response to vitamin E	7.68	0.00041042	P19652	Alpha-1-acid glycoprotein 2 OS=Homo sapiens OX=9606 GN=ORM2 PE=1 SV=2	ORM2	23.602	34.8	25	8	6	8	4912700000
Biological Process	GO:0010896	6	regulation of triglyceride catabolic process	7.68	0.00041042	P02647	Apolipoprotein A-I OS=Homo sapiens OX=9606 GN=APOA1 PE=1 SV=1	APOA1	30.777	20.6	5	5	5	5	76295000
Biological Process	GO:0010896	6	regulation of triglyceride catabolic process	7.68	0.00041042	P02655	Apolipoprotein C-II OS=Homo sapiens OX=9606 GN=APOC2 PE=1 SV=1	APOC2	11.284	19.8	3	2	2	2	111850000
Biological Process	GO:0010896	6	regulation of triglyceride catabolic process	7.68	0.00041042	P02656	Apolipoprotein C-III OS=Homo sapiens OX=9606 GN=APOC3 PE=1 SV=1	APOC3	10.852	0	0	0	0	0	0
Biological Process	GO:0010896	6	regulation of triglyceride catabolic process	7.68	0.00041042	P02749	Beta-2-glycoprotein 1 OS=Homo sapiens OX=9606 GN=APOH PE=1 SV=3	APOH	38.298	30.4	26	10	10	10	5331200000
Biological Process	GO:0090130	2	tissue migration	2.32	0.000416987	O15144	Actin-related protein 2/3 complex subunit 2 OS=Homo sapiens OX=9606 GN=ARPC2 PE=1 SV=1	ARPC2	34.333	0	0	0	0	0	0
Biological Process	GO:0050853	6	B cell receptor signaling pathway	5.08	0.00042371	P01860	Immunoglobulin heavy constant gamma 3 OS=Homo sapiens OX=9606 GN=IGHG3 PE=1 SV=2	IGHG3	41.287	7.4	1	2	1	1	17716000
Biological Process	GO:0033591	5	response to L-ascorbic acid	10.64	0.000425712	P00738	Haptoglobin OS=Homo sapiens OX=9606 GN=HP PE=1 SV=1	HP	45.205	53.7	182	24	13	24	96502000000
Biological Process	GO:0033591	5	response to L-ascorbic acid	10.64	0.000425712	P00739	Haptoglobin-related protein OS=Homo sapiens OX=9606 GN=HPR PE=2 SV=2	HPR	39.029	34.2	5	14	3	3	169590000
Biological Process	GO:0071345	5	cellular response to cytokine stimulus	1.64	0.000456094	P30530	Tyrosine-protein kinase receptor UFO OS=Homo sapiens OX=9606 GN=AXL PE=1 SV=4	AXL	98.336	0	0	0	0	0	0
Biological Process	GO:0071345	5	cellular response to cytokine stimulus	1.64	0.000456094	P35232	Prohibitin 1 OS=Homo sapiens OX=9606 GN=PHB1 PE=1 SV=1	PHB1	29.804	0	0	0	0	0	0
Biological Process	GO:0071345	5	cellular response to cytokine stimulus	1.64	0.000456094	P37837	Transaldolase OS=Homo sapiens OX=9606 GN=TALDO1 PE=1 SV=2	TALDO1	37.54	0	0	0	0	0	0
Biological Process	GO:0071345	5	cellular response to cytokine stimulus	1.64	0.000456094	P38646	Stress-70 protein, mitochondrial OS=Homo sapiens OX=9606 GN=HSPA9 PE=1 SV=2	HSPA9	73.68	0	0	0	0	0	0
Biological Process	GO:0071345	5	cellular response to cytokine stimulus	1.64	0.000456094	P40121	Macrophage-capping protein OS=Homo sapiens OX=9606 GN=CAPG PE=1 SV=2	CAPG	38.498	0	0	0	0	0	0
Biological Process	GO:0071345	5	cellular response to cytokine stimulus	1.64	0.000456094	P42224	Signal transducer and activator of transcription 1-alpha/beta OS=Homo sapiens OX=9606 GN=STAT1 PE=1 SV=2	STAT1	87.334	0	0	0	0	0	0
Biological Process	GO:0071345	5	cellular response to cytokine stimulus	1.64	0.000456094	P49662	Caspase-4 OS=Homo sapiens OX=9606 GN=CASP4 PE=1 SV=1	CASP4	43.262	4	6	1	1	1	29842000
Biological Process	GO:0071345	5	cellular response to cytokine stimulus	1.64	0.000456094	P52907	F-actin-capping protein subunit alpha-1 OS=Homo sapiens OX=9606 GN=CAPZA1 PE=1 SV=3	CAPZA1	32.922	0	0	0	0	0	0
Biological Process	GO:0071345	5	cellular response to cytokine stimulus	1.64	0.000456094	P63261	Actin, cytoplasmic 2 OS=Homo sapiens OX=9606 GN=ACTG1 PE=1 SV=1	ACTG1	41.792	9.3	1	3	3	3	4758900
Biological Process	GO:0071345	5	cellular response to cytokine stimulus	1.64	0.000456094	P62937	Peptidyl-prolyl cis-trans isomerase A OS=Homo sapiens OX=9606 GN=PPIA PE=1 SV=2	PPIA	18.012	0	0	0	0	0	0
Biological Process	GO:0071345	5	cellular response to cytokine stimulus	1.64	0.000456094	P63104	14-3-3 protein zeta/delta OS=Homo sapiens OX=9606 GN=YWHAZ PE=1 SV=1	YWHAZ	27.745	0	0	0	0	0	0
Biological Process	GO:0071345	5	cellular response to cytokine stimulus	1.64	0.000456094	P78417	Glutathione S-transferase omega-1 OS=Homo sapiens OX=9606 GN=GSTO1 PE=1 SV=2	GSTO1	27.566	0	0	0	0	0	0
Biological Process	GO:0071345	5	cellular response to cytokine stimulus	1.64	0.000456094	P80188	Neutrophil gelatinase-associated lipocalin OS=Homo sapiens OX=9606 GN=LCN2 PE=1 SV=2	LCN2	22.588	0	0	0	0	0	0
Biological Process	GO:0071345	5	cellular response to cytokine stimulus	1.64	0.000456094	Q16658	Fascin OS=Homo sapiens OX=9606 GN=FSCN1 PE=1 SV=3	FSCN1	54.529	0	0	0	0	0	0
Biological Process	GO:0071345	5	cellular response to cytokine stimulus	1.64	0.000456094	Q96FW1	Ubiquitin thioesterase OTUB1 OS=Homo sapiens OX=9606 GN=OTUB1 PE=1 SV=2	OTUB1	31.284	0	0	0	0	0	0
Biological Process	GO:0071345	5	cellular response to cytokine stimulus	1.64	0.000456094	Q9NPH3	Interleukin-1 receptor accessory protein OS=Homo sapiens OX=9606 GN=IL1RAP PE=1 SV=2	IL1RAP	65.418	5.3	2	2	2	2	10635000
Biological Process	GO:0071345	5	cellular response to cytokine stimulus	1.64	0.000456094	Q9NZH8	Interleukin-36 gamma OS=Homo sapiens OX=9606 GN=IL36G PE=1 SV=1	IL36G	18.721	10.7	1	1	1	1	0
Biological Process	GO:0071345	5	cellular response to cytokine stimulus	1.64	0.000456094	Q9NZT1	Calmodulin-like protein 5 OS=Homo sapiens OX=9606 GN=CALML5 PE=1 SV=2	CALML5	15.892	21.2	4	3	3	3	12650000
Biological Process	GO:0071345	5	cellular response to cytokine stimulus	1.64	0.000456094	P01033	Metalloproteinase inhibitor 1 OS=Homo sapiens OX=9606 GN=TIMP1 PE=1 SV=1	TIMP1	23.171	12.1	1	2	2	2	17139000
Biological Process	GO:0071345	5	cellular response to cytokine stimulus	1.64	0.000456094	P13598	Intercellular adhesion molecule 2 OS=Homo sapiens OX=9606 GN=ICAM2 PE=1 SV=2	ICAM2	30.654	0	0	0	0	0	0
Biological Process	GO:0071345	5	cellular response to cytokine stimulus	1.64	0.000456094	P61769	Beta-2-microglobulin OS=Homo sapiens OX=9606 GN=B2M PE=1 SV=1	B2M	13.714	8.4	1	1	1	1	13665000
Biological Process	GO:0071345	5	cellular response to cytokine stimulus	1.64	0.000456094	Q01628	Interferon-induced transmembrane protein 3 OS=Homo sapiens OX=9606 GN=IFITM3 PE=1 SV=2	IFITM3	14.632	0	0	0	0	0	0
Biological Process	GO:0071345	5	cellular response to cytokine stimulus	1.64	0.000456094	P00746	Complement factor D OS=Homo sapiens OX=9606 GN=CFD PE=1 SV=5	CFD	27.033	0	0	0	0	0	0
Biological Process	GO:0071345	5	cellular response to cytokine stimulus	1.64	0.000456094	P26992	Ciliary neurotrophic factor receptor subunit alpha OS=Homo sapiens OX=9606 GN=CNTFR PE=1 SV=2	CNTFR	40.633	3.5	1	1	1	1	4217500
Biological Process	GO:0071345	5	cellular response to cytokine stimulus	1.64	0.000456094	P23470	Receptor-type tyrosine-protein phosphatase gamma OS=Homo sapiens OX=9606 GN=PTPRG PE=1 SV=4	PTPRG	162	1	1	1	1	1	5890900
Biological Process	GO:0071345	5	cellular response to cytokine stimulus	1.64	0.000456094	P22735	Protein-glutamine gamma-glutamyltransferase K OS=Homo sapiens OX=9606 GN=TGM1 PE=1 SV=4	TGM1	89.786	3.3	2	2	2	2	11308000
Biological Process	GO:0071345	5	cellular response to cytokine stimulus	1.64	0.000456094	P18510	Interleukin-1 receptor antagonist protein OS=Homo sapiens OX=9606 GN=IL1RN PE=1 SV=1	IL1RN	20.055	0	0	0	0	0	0
Biological Process	GO:0033591	5	response to L-ascorbic acid	10.64	0.000425712	P04040	Catalase OS=Homo sapiens OX=9606 GN=CAT PE=1 SV=3	CAT	59.755	8.7	2	2	2	2	7648000
Biological Process	GO:0033591	5	response to L-ascorbic acid	10.64	0.000425712	P09211	Glutathione S-transferase P OS=Homo sapiens OX=9606 GN=GSTP1 PE=1 SV=2	GSTP1	23.356	0	0	0	0	0	0
Biological Process	GO:0071345	5	cellular response to cytokine stimulus	1.64	0.000456094	O75369	Filamin-B OS=Homo sapiens OX=9606 GN=FLNB PE=1 SV=2	FLNB	278.16	0	0	0	0	0	0
Biological Process	GO:0071345	5	cellular response to cytokine stimulus	1.64	0.000456094	P00441	Superoxide dismutase [Cu-Zn] OS=Homo sapiens OX=9606 GN=SOD1 PE=1 SV=2	SOD1	15.936	0	0	0	0	0	0
Biological Process	GO:0071345	5	cellular response to cytokine stimulus	1.64	0.000456094	P01011	Alpha-1-antichymotrypsin OS=Homo sapiens OX=9606 GN=SERPINA3 PE=1 SV=2	SERPINA3	47.65	16.8	5	5	5	5	76232000
Biological Process	GO:0071345	5	cellular response to cytokine stimulus	1.64	0.000456094	P04083	Annexin A1 OS=Homo sapiens OX=9606 GN=ANXA1 PE=1 SV=2	ANXA1	38.714	0	0	0	0	0	0
Biological Process	GO:0071345	5	cellular response to cytokine stimulus	1.64	0.000456094	P04406	Glyceraldehyde-3-phosphate dehydrogenase OS=Homo sapiens OX=9606 GN=GAPDH PE=1 SV=3	GAPDH	36.053	28.7	5	6	6	6	28325000
Biological Process	GO:0071345	5	cellular response to cytokine stimulus	1.64	0.000456094	P04792	Heat shock protein beta-1 OS=Homo sapiens OX=9606 GN=HSPB1 PE=1 SV=2	HSPB1	22.782	7.8	1	1	1	1	1730200
Biological Process	GO:0071345	5	cellular response to cytokine stimulus	1.64	0.000456094	P05089	Arginase-1 OS=Homo sapiens OX=9606 GN=ARG1 PE=1 SV=2	ARG1	34.735	8.4	5	3	3	3	32997000
Biological Process	GO:0071345	5	cellular response to cytokine stimulus	1.64	0.000456094	P05120	Plasminogen activator inhibitor 2 OS=Homo sapiens OX=9606 GN=SERPINB2 PE=1 SV=2	SERPINB2	46.596	0	0	0	0	0	0
Biological Process	GO:0071345	5	cellular response to cytokine stimulus	1.64	0.000456094	P05362	Intercellular adhesion molecule 1 OS=Homo sapiens OX=9606 GN=ICAM1 PE=1 SV=2	ICAM1	57.825	0	0	0	0	0	0
Biological Process	GO:0043068	6	positive regulation of programmed cell death	1.74	0.000511947	P05109	Protein S100-A8 OS=Homo sapiens OX=9606 GN=S100A8 PE=1 SV=1	S100A8	10.834	0	0	0	0	0	0
Biological Process	GO:0071345	5	cellular response to cytokine stimulus	1.64	0.000456094	P05556	Integrin beta-1 OS=Homo sapiens OX=9606 GN=ITGB1 PE=1 SV=2	ITGB1	88.414	0	0	0	0	0	0
Biological Process	GO:0071345	5	cellular response to cytokine stimulus	1.64	0.000456094	P07333	Macrophage colony-stimulating factor 1 receptor OS=Homo sapiens OX=9606 GN=CSF1R PE=1 SV=2	CSF1R	107.98	2.2	2	2	2	2	24589000
Biological Process	GO:0071345	5	cellular response to cytokine stimulus	1.64	0.000456094	P07355	Annexin A2 OS=Homo sapiens OX=9606 GN=ANXA2 PE=1 SV=2	ANXA2	38.604	15.3	4	4	4	4	8350100
Biological Process	GO:0071345	5	cellular response to cytokine stimulus	1.64	0.000456094	P07359	Platelet glycoprotein Ib alpha chain OS=Homo sapiens OX=9606 GN=GP1BA PE=1 SV=2	GP1BA	71.539	0	0	0	0	0	0
Biological Process	GO:0071345	5	cellular response to cytokine stimulus	1.64	0.000456094	P08238	Heat shock protein HSP 90-beta OS=Homo sapiens OX=9606 GN=HSP90AB1 PE=1 SV=4	HSP90AB1	83.263	0	0	0	0	0	0
Biological Process	GO:0071345	5	cellular response to cytokine stimulus	1.64	0.000456094	P08670	Vimentin OS=Homo sapiens OX=9606 GN=VIM PE=1 SV=4	VIM	53.651	0	0	0	0	0	0
Biological Process	GO:0071345	5	cellular response to cytokine stimulus	1.64	0.000456094	P09601	Heme oxygenase 1 OS=Homo sapiens OX=9606 GN=HMOX1 PE=1 SV=1	HMOX1	32.818	0	0	0	0	0	0
Biological Process	GO:0071345	5	cellular response to cytokine stimulus	1.64	0.000456094	P62987	Ubiquitin-60S ribosomal protein L40 OS=Homo sapiens OX=9606 GN=UBA52 PE=1 SV=2	UBA52	14.728	39.1	7	6	6	6	90657000
Biological Process	GO:0071345	5	cellular response to cytokine stimulus	1.64	0.000456094	P11021	Endoplasmic reticulum chaperone BiP OS=Homo sapiens OX=9606 GN=HSPA5 PE=1 SV=2	HSPA5	72.332	0	0	0	0	0	0
Biological Process	GO:0071345	5	cellular response to cytokine stimulus	1.64	0.000456094	P11142	Heat shock cognate 71 kDa protein OS=Homo sapiens OX=9606 GN=HSPA8 PE=1 SV=1	HSPA8	70.897	0	0	0	0	0	0
Biological Process	GO:0071345	5	cellular response to cytokine stimulus	1.64	0.000456094	P14174	Macrophage migration inhibitory factor OS=Homo sapiens OX=9606 GN=MIF PE=1 SV=4	MIF	12.476	0	0	0	0	0	0
Biological Process	GO:0071345	5	cellular response to cytokine stimulus	1.64	0.000456094	P16070	CD44 antigen OS=Homo sapiens OX=9606 GN=CD44 PE=1 SV=3	CD44	81.537	3	2	2	2	2	118550000
Biological Process	GO:0071345	5	cellular response to cytokine stimulus	1.64	0.000456094	P06396	Gelsolin OS=Homo sapiens OX=9606 GN=GSN PE=1 SV=1	GSN	85.696	0	0	0	0	0	0
Biological Process	GO:0051851	4	modulation by host of symbiont process	3.66	0.000410095	P09601	Heme oxygenase 1 OS=Homo sapiens OX=9606 GN=HMOX1 PE=1 SV=1	HMOX1	32.818	0	0	0	0	0	0
Biological Process	GO:0043068	6	positive regulation of programmed cell death	1.74	0.000511947	P05556	Integrin beta-1 OS=Homo sapiens OX=9606 GN=ITGB1 PE=1 SV=2	ITGB1	88.414	0	0	0	0	0	0
Biological Process	GO:0043068	6	positive regulation of programmed cell death	1.74	0.000511947	P06702	Protein S100-A9 OS=Homo sapiens OX=9606 GN=S100A9 PE=1 SV=1	S100A9	13.242	43	4	3	3	3	31021000
Biological Process	GO:0070301	5	cellular response to hydrogen peroxide	3.86	0.000535385	P04792	Heat shock protein beta-1 OS=Homo sapiens OX=9606 GN=HSPB1 PE=1 SV=2	HSPB1	22.782	7.8	1	1	1	1	1730200
Biological Process	GO:0070301	5	cellular response to hydrogen peroxide	3.86	0.000535385	P05089	Arginase-1 OS=Homo sapiens OX=9606 GN=ARG1 PE=1 SV=2	ARG1	34.735	8.4	5	3	3	3	32997000
Biological Process	GO:0070301	5	cellular response to hydrogen peroxide	3.86	0.000535385	P14174	Macrophage migration inhibitory factor OS=Homo sapiens OX=9606 GN=MIF PE=1 SV=4	MIF	12.476	0	0	0	0	0	0
Biological Process	GO:0070301	5	cellular response to hydrogen peroxide	3.86	0.000535385	P30530	Tyrosine-protein kinase receptor UFO OS=Homo sapiens OX=9606 GN=AXL PE=1 SV=4	AXL	98.336	0	0	0	0	0	0
Biological Process	GO:0070301	5	cellular response to hydrogen peroxide	3.86	0.000535385	P80188	Neutrophil gelatinase-associated lipocalin OS=Homo sapiens OX=9606 GN=LCN2 PE=1 SV=2	LCN2	22.588	0	0	0	0	0	0
Biological Process	GO:0070301	5	cellular response to hydrogen peroxide	3.86	0.000535385	P01034	Cystatin-C OS=Homo sapiens OX=9606 GN=CST3 PE=1 SV=1	CST3	15.799	23.3	3	3	3	3	14030000
Biological Process	GO:0070301	5	cellular response to hydrogen peroxide	3.86	0.000535385	O94759	Transient receptor potential cation channel subfamily M member 2 OS=Homo sapiens OX=9606 GN=TRPM2 PE=1 SV=2	TRPM2	171.2	0	0	0	0	0	0
Biological Process	GO:0019430	4	removal of superoxide radicals	9.98	0.000556447	P00441	Superoxide dismutase [Cu-Zn] OS=Homo sapiens OX=9606 GN=SOD1 PE=1 SV=2	SOD1	15.936	0	0	0	0	0	0
Biological Process	GO:0019430	4	removal of superoxide radicals	9.98	0.000556447	P05164	Myeloperoxidase OS=Homo sapiens OX=9606 GN=MPO PE=1 SV=1	MPO	83.868	2.7	1	1	1	1	1665100
Biological Process	GO:0019430	4	removal of superoxide radicals	9.98	0.000556447	P32119	Peroxiredoxin-2 OS=Homo sapiens OX=9606 GN=PRDX2 PE=1 SV=5	PRDX2	21.892	0	0	0	0	0	0
Biological Process	GO:0019430	4	removal of superoxide radicals	9.98	0.000556447	Q06830	Peroxiredoxin-1 OS=Homo sapiens OX=9606 GN=PRDX1 PE=1 SV=1	PRDX1	22.11	9	1	1	1	1	1860400
Biological Process	GO:0010631	5	epithelial cell migration	2.34	0.000559652	O15144	Actin-related protein 2/3 complex subunit 2 OS=Homo sapiens OX=9606 GN=ARPC2 PE=1 SV=1	ARPC2	34.333	0	0	0	0	0	0
Biological Process	GO:0010631	5	epithelial cell migration	2.34	0.000559652	P00533	Epidermal growth factor receptor OS=Homo sapiens OX=9606 GN=EGFR PE=1 SV=2	EGFR	134.28	0	0	0	0	0	0
Biological Process	GO:0010631	5	epithelial cell migration	2.34	0.000559652	P02647	Apolipoprotein A-I OS=Homo sapiens OX=9606 GN=APOA1 PE=1 SV=1	APOA1	30.777	20.6	5	5	5	5	76295000
Biological Process	GO:0010631	5	epithelial cell migration	2.34	0.000559652	P05556	Integrin beta-1 OS=Homo sapiens OX=9606 GN=ITGB1 PE=1 SV=2	ITGB1	88.414	0	0	0	0	0	0
Biological Process	GO:0010631	5	epithelial cell migration	2.34	0.000559652	P07333	Macrophage colony-stimulating factor 1 receptor OS=Homo sapiens OX=9606 GN=CSF1R PE=1 SV=2	CSF1R	107.98	2.2	2	2	2	2	24589000
Biological Process	GO:0010631	5	epithelial cell migration	2.34	0.000559652	P07384	Calpain-1 catalytic subunit OS=Homo sapiens OX=9606 GN=CAPN1 PE=1 SV=1	CAPN1	81.889	0	0	0	0	0	0
Biological Process	GO:0010631	5	epithelial cell migration	2.34	0.000559652	P08779	Keratin, type I cytoskeletal 16 OS=Homo sapiens OX=9606 GN=KRT16 PE=1 SV=4	KRT16	51.267	33	9	16	7	7	65846000
Biological Process	GO:0010631	5	epithelial cell migration	2.34	0.000559652	P16885	1-phosphatidylinositol 4,5-bisphosphate phosphodiesterase gamma-2 OS=Homo sapiens OX=9606 GN=PLCG2 PE=1 SV=4	PLCG2	147.87	0	0	0	0	0	0
Biological Process	GO:0010631	5	epithelial cell migration	2.34	0.000559652	P19012	Keratin, type I cytoskeletal 15 OS=Homo sapiens OX=9606 GN=KRT15 PE=1 SV=3	KRT15	49.211	0	0	0	0	0	0
Biological Process	GO:0010631	5	epithelial cell migration	2.34	0.000559652	P27487	Dipeptidyl peptidase 4 OS=Homo sapiens OX=9606 GN=DPP4 PE=1 SV=2	DPP4	88.278	15	7	8	8	8	79452000
Biological Process	GO:0010631	5	epithelial cell migration	2.34	0.000559652	P35527	Keratin, type I cytoskeletal 9 OS=Homo sapiens OX=9606 GN=KRT9 PE=1 SV=3	KRT9	62.064	63.6	163	44	44	44	9025200000
Biological Process	GO:0010631	5	epithelial cell migration	2.34	0.000559652	P35579	Myosin-9 OS=Homo sapiens OX=9606 GN=MYH9 PE=1 SV=4	MYH9	226.53	1.8	2	2	2	2	2939500
Biological Process	GO:0070301	5	cellular response to hydrogen peroxide	3.86	0.000535385	P04083	Annexin A1 OS=Homo sapiens OX=9606 GN=ANXA1 PE=1 SV=2	ANXA1	38.714	0	0	0	0	0	0
Biological Process	GO:0010631	5	epithelial cell migration	2.34	0.000559652	P35908	Keratin, type II cytoskeletal 2 epidermal OS=Homo sapiens OX=9606 GN=KRT2 PE=1 SV=2	KRT2	65.432	76.8	101	48	35	44	4005200000
Biological Process	GO:0070301	5	cellular response to hydrogen peroxide	3.86	0.000535385	O15144	Actin-related protein 2/3 complex subunit 2 OS=Homo sapiens OX=9606 GN=ARPC2 PE=1 SV=1	ARPC2	34.333	0	0	0	0	0	0
Biological Process	GO:0098869	3	cellular oxidant detoxification	3.86	0.000535385	Q06830	Peroxiredoxin-1 OS=Homo sapiens OX=9606 GN=PRDX1 PE=1 SV=1	PRDX1	22.11	9	1	1	1	1	1860400
Biological Process	GO:0043408	6	regulation of MAPK cascade	1.68	0.00053481	P13598	Intercellular adhesion molecule 2 OS=Homo sapiens OX=9606 GN=ICAM2 PE=1 SV=2	ICAM2	30.654	0	0	0	0	0	0
Biological Process	GO:0043408	6	regulation of MAPK cascade	1.68	0.00053481	Q02763	Angiopoietin-1 receptor OS=Homo sapiens OX=9606 GN=TEK PE=1 SV=2	TEK	125.83	0	0	0	0	0	0
Biological Process	GO:0043408	6	regulation of MAPK cascade	1.68	0.00053481	P00746	Complement factor D OS=Homo sapiens OX=9606 GN=CFD PE=1 SV=5	CFD	27.033	0	0	0	0	0	0
Biological Process	GO:0043408	6	regulation of MAPK cascade	1.68	0.00053481	P0C0L4	Complement C4-A OS=Homo sapiens OX=9606 GN=C4A PE=1 SV=2	C4A	192.78	0	0	0	0	0	0
Biological Process	GO:0043408	6	regulation of MAPK cascade	1.68	0.00053481	P19022	Cadherin-2 OS=Homo sapiens OX=9606 GN=CDH2 PE=1 SV=4	CDH2	99.808	0	0	0	0	0	0
Biological Process	GO:0043408	6	regulation of MAPK cascade	1.68	0.00053481	Q96KB5	Lymphokine-activated killer T-cell-originated protein kinase OS=Homo sapiens OX=9606 GN=PBK PE=1 SV=3	PBK	36.085	0	0	0	0	0	0
Biological Process	GO:0043408	6	regulation of MAPK cascade	1.68	0.00053481	Q9H4G4	Golgi-associated plant pathogenesis-related protein 1 OS=Homo sapiens OX=9606 GN=GLIPR2 PE=1 SV=3	GLIPR2	17.218	0	0	0	0	0	0
Biological Process	GO:0006641	6	triglyceride metabolic process	3.86	0.000535385	P02647	Apolipoprotein A-I OS=Homo sapiens OX=9606 GN=APOA1 PE=1 SV=1	APOA1	30.777	20.6	5	5	5	5	76295000
Biological Process	GO:0006641	6	triglyceride metabolic process	3.86	0.000535385	P02652	Apolipoprotein A-II OS=Homo sapiens OX=9606 GN=APOA2 PE=1 SV=1	APOA2	11.175	19	7	3	3	3	7512000000
Biological Process	GO:0006641	6	triglyceride metabolic process	3.86	0.000535385	P02654	Apolipoprotein C-I OS=Homo sapiens OX=9606 GN=APOC1 PE=1 SV=1	APOC1	9.3318	34.9	3	3	3	3	164400000
Biological Process	GO:0006641	6	triglyceride metabolic process	3.86	0.000535385	P02656	Apolipoprotein C-III OS=Homo sapiens OX=9606 GN=APOC3 PE=1 SV=1	APOC3	10.852	0	0	0	0	0	0
Biological Process	GO:0006641	6	triglyceride metabolic process	3.86	0.000535385	P02749	Beta-2-glycoprotein 1 OS=Homo sapiens OX=9606 GN=APOH PE=1 SV=3	APOH	38.298	30.4	26	10	10	10	5331200000
Biological Process	GO:0006641	6	triglyceride metabolic process	3.86	0.000535385	P04040	Catalase OS=Homo sapiens OX=9606 GN=CAT PE=1 SV=3	CAT	59.755	8.7	2	2	2	2	7648000
Biological Process	GO:0006641	6	triglyceride metabolic process	3.86	0.000535385	P07108	Acyl-CoA-binding protein OS=Homo sapiens OX=9606 GN=DBI PE=1 SV=2	DBI	10.044	0	0	0	0	0	0
Biological Process	GO:0006641	6	triglyceride metabolic process	3.86	0.000535385	Q01469	Fatty acid-binding protein 5 OS=Homo sapiens OX=9606 GN=FABP5 PE=1 SV=3	FABP5	15.164	0	0	0	0	0	0
Biological Process	GO:0006641	6	triglyceride metabolic process	3.86	0.000535385	P11597	Cholesteryl ester transfer protein OS=Homo sapiens OX=9606 GN=CETP PE=1 SV=2	CETP	54.756	0	0	0	0	0	0
Biological Process	GO:0098869	3	cellular oxidant detoxification	3.86	0.000535385	P00441	Superoxide dismutase [Cu-Zn] OS=Homo sapiens OX=9606 GN=SOD1 PE=1 SV=2	SOD1	15.936	0	0	0	0	0	0
Biological Process	GO:0098869	3	cellular oxidant detoxification	3.86	0.000535385	P04040	Catalase OS=Homo sapiens OX=9606 GN=CAT PE=1 SV=3	CAT	59.755	8.7	2	2	2	2	7648000
Biological Process	GO:0098869	3	cellular oxidant detoxification	3.86	0.000535385	P05164	Myeloperoxidase OS=Homo sapiens OX=9606 GN=MPO PE=1 SV=1	MPO	83.868	2.7	1	1	1	1	1665100
Biological Process	GO:0098869	3	cellular oxidant detoxification	3.86	0.000535385	P09211	Glutathione S-transferase P OS=Homo sapiens OX=9606 GN=GSTP1 PE=1 SV=2	GSTP1	23.356	0	0	0	0	0	0
Biological Process	GO:0098869	3	cellular oxidant detoxification	3.86	0.000535385	P10599	Thioredoxin OS=Homo sapiens OX=9606 GN=TXN PE=1 SV=3	TXN	11.737	0	0	0	0	0	0
Biological Process	GO:0098869	3	cellular oxidant detoxification	3.86	0.000535385	P32119	Peroxiredoxin-2 OS=Homo sapiens OX=9606 GN=PRDX2 PE=1 SV=5	PRDX2	21.892	0	0	0	0	0	0
Biological Process	GO:0098869	3	cellular oxidant detoxification	3.86	0.000535385	P78417	Glutathione S-transferase omega-1 OS=Homo sapiens OX=9606 GN=GSTO1 PE=1 SV=2	GSTO1	27.566	0	0	0	0	0	0
Biological Process	GO:0098869	3	cellular oxidant detoxification	3.86	0.000535385	O95445	Apolipoprotein M OS=Homo sapiens OX=9606 GN=APOM PE=1 SV=2	APOM	21.253	0	0	0	0	0	0
Biological Process	GO:0043408	6	regulation of MAPK cascade	1.68	0.00053481	O75340	Programmed cell death protein 6 OS=Homo sapiens OX=9606 GN=PDCD6 PE=1 SV=1	PDCD6	21.868	0	0	0	0	0	0
Biological Process	GO:0010631	5	epithelial cell migration	2.34	0.000559652	P47756	F-actin-capping protein subunit beta OS=Homo sapiens OX=9606 GN=CAPZB PE=1 SV=5	CAPZB	30.628	0	0	0	0	0	0
Biological Process	GO:0010631	5	epithelial cell migration	2.34	0.000559652	P80108	Phosphatidylinositol-glycan-specific phospholipase D OS=Homo sapiens OX=9606 GN=GPLD1 PE=1 SV=3	GPLD1	92.335	7.7	5	5	5	5	109680000
Biological Process	GO:0009743	4	response to carbohydrate	2.4	0.000568407	Q96IY4	Carboxypeptidase B2 OS=Homo sapiens OX=9606 GN=CPB2 PE=1 SV=2	CPB2	48.424	16.3	2	3	3	3	43281000
Biological Process	GO:0009743	4	response to carbohydrate	2.4	0.000568407	O95445	Apolipoprotein M OS=Homo sapiens OX=9606 GN=APOM PE=1 SV=2	APOM	21.253	0	0	0	0	0	0
Biological Process	GO:0009743	4	response to carbohydrate	2.4	0.000568407	P01034	Cystatin-C OS=Homo sapiens OX=9606 GN=CST3 PE=1 SV=1	CST3	15.799	23.3	3	3	3	3	14030000
Biological Process	GO:0045834	5	positive regulation of lipid metabolic process	2.66	0.000569719	P00533	Epidermal growth factor receptor OS=Homo sapiens OX=9606 GN=EGFR PE=1 SV=2	EGFR	134.28	0	0	0	0	0	0
Biological Process	GO:0045834	5	positive regulation of lipid metabolic process	2.66	0.000569719	P01019	Angiotensinogen OS=Homo sapiens OX=9606 GN=AGT PE=1 SV=3	AGT	53.154	7.6	3	3	3	3	91548000
Biological Process	GO:0045834	5	positive regulation of lipid metabolic process	2.66	0.000569719	P02647	Apolipoprotein A-I OS=Homo sapiens OX=9606 GN=APOA1 PE=1 SV=1	APOA1	30.777	20.6	5	5	5	5	76295000
Biological Process	GO:0045834	5	positive regulation of lipid metabolic process	2.66	0.000569719	P02652	Apolipoprotein A-II OS=Homo sapiens OX=9606 GN=APOA2 PE=1 SV=1	APOA2	11.175	19	7	3	3	3	7512000000
Biological Process	GO:0045834	5	positive regulation of lipid metabolic process	2.66	0.000569719	P02654	Apolipoprotein C-I OS=Homo sapiens OX=9606 GN=APOC1 PE=1 SV=1	APOC1	9.3318	34.9	3	3	3	3	164400000
Biological Process	GO:0045834	5	positive regulation of lipid metabolic process	2.66	0.000569719	P02655	Apolipoprotein C-II OS=Homo sapiens OX=9606 GN=APOC2 PE=1 SV=1	APOC2	11.284	19.8	3	2	2	2	111850000
Biological Process	GO:0045834	5	positive regulation of lipid metabolic process	2.66	0.000569719	P02656	Apolipoprotein C-III OS=Homo sapiens OX=9606 GN=APOC3 PE=1 SV=1	APOC3	10.852	0	0	0	0	0	0
Biological Process	GO:0045834	5	positive regulation of lipid metabolic process	2.66	0.000569719	P02749	Beta-2-glycoprotein 1 OS=Homo sapiens OX=9606 GN=APOH PE=1 SV=3	APOH	38.298	30.4	26	10	10	10	5331200000
Biological Process	GO:0045834	5	positive regulation of lipid metabolic process	2.66	0.000569719	P04083	Annexin A1 OS=Homo sapiens OX=9606 GN=ANXA1 PE=1 SV=2	ANXA1	38.714	0	0	0	0	0	0
Biological Process	GO:0045834	5	positive regulation of lipid metabolic process	2.66	0.000569719	P07108	Acyl-CoA-binding protein OS=Homo sapiens OX=9606 GN=DBI PE=1 SV=2	DBI	10.044	0	0	0	0	0	0
Biological Process	GO:0045834	5	positive regulation of lipid metabolic process	2.66	0.000569719	P09619	Platelet-derived growth factor receptor beta OS=Homo sapiens OX=9606 GN=PDGFRB PE=1 SV=1	PDGFRB	123.97	2.9	3	2	2	2	4182400
Biological Process	GO:0045834	5	positive regulation of lipid metabolic process	2.66	0.000569719	P63244	Receptor of activated protein C kinase 1 OS=Homo sapiens OX=9606 GN=RACK1 PE=1 SV=3	RACK1	35.076	0	0	0	0	0	0
Biological Process	GO:0045834	5	positive regulation of lipid metabolic process	2.66	0.000569719	P80108	Phosphatidylinositol-glycan-specific phospholipase D OS=Homo sapiens OX=9606 GN=GPLD1 PE=1 SV=3	GPLD1	92.335	7.7	5	5	5	5	109680000
Biological Process	GO:0045834	5	positive regulation of lipid metabolic process	2.66	0.000569719	Q8IZF2	Adhesion G protein-coupled receptor F5 OS=Homo sapiens OX=9606 GN=ADGRF5 PE=1 SV=3	ADGRF5	149.46	0	0	0	0	0	0
Biological Process	GO:0045834	5	positive regulation of lipid metabolic process	2.66	0.000569719	Q02763	Angiopoietin-1 receptor OS=Homo sapiens OX=9606 GN=TEK PE=1 SV=2	TEK	125.83	0	0	0	0	0	0
Biological Process	GO:1903532	5	positive regulation of secretion by cell	1.93	0.000584623	P00533	Epidermal growth factor receptor OS=Homo sapiens OX=9606 GN=EGFR PE=1 SV=2	EGFR	134.28	0	0	0	0	0	0
Biological Process	GO:1903532	5	positive regulation of secretion by cell	1.93	0.000584623	P01019	Angiotensinogen OS=Homo sapiens OX=9606 GN=AGT PE=1 SV=3	AGT	53.154	7.6	3	3	3	3	91548000
Biological Process	GO:1903532	5	positive regulation of secretion by cell	1.93	0.000584623	P01024	Complement C3 OS=Homo sapiens OX=9606 GN=C3 PE=1 SV=2	C3	187.15	0	0	0	0	0	0
Biological Process	GO:1903532	5	positive regulation of secretion by cell	1.93	0.000584623	P02753	Retinol-binding protein 4 OS=Homo sapiens OX=9606 GN=RBP4 PE=1 SV=3	RBP4	23.01	47.3	7	7	7	7	728740000
Biological Process	GO:1903532	5	positive regulation of secretion by cell	1.93	0.000584623	P02763	Alpha-1-acid glycoprotein 1 OS=Homo sapiens OX=9606 GN=ORM1 PE=1 SV=2	ORM1	23.539	41.8	11	8	6	6	3742300000
Biological Process	GO:0009743	4	response to carbohydrate	2.4	0.000568407	P80108	Phosphatidylinositol-glycan-specific phospholipase D OS=Homo sapiens OX=9606 GN=GPLD1 PE=1 SV=3	GPLD1	92.335	7.7	5	5	5	5	109680000
Biological Process	GO:0010631	5	epithelial cell migration	2.34	0.000559652	Q05193	Dynamin-1 OS=Homo sapiens OX=9606 GN=DNM1 PE=1 SV=2	DNM1	97.407	0	0	0	0	0	0
Biological Process	GO:0009743	4	response to carbohydrate	2.4	0.000568407	P63244	Receptor of activated protein C kinase 1 OS=Homo sapiens OX=9606 GN=RACK1 PE=1 SV=3	RACK1	35.076	0	0	0	0	0	0
Biological Process	GO:0009743	4	response to carbohydrate	2.4	0.000568407	P15104	Glutamine synthetase OS=Homo sapiens OX=9606 GN=GLUL PE=1 SV=4	GLUL	42.064	0	0	0	0	0	0
Biological Process	GO:0010631	5	epithelial cell migration	2.34	0.000559652	Q04695	Keratin, type I cytoskeletal 17 OS=Homo sapiens OX=9606 GN=KRT17 PE=1 SV=2	KRT17	48.105	32.6	5	10	5	5	28013000
Biological Process	GO:0010631	5	epithelial cell migration	2.34	0.000559652	Q9Y3M8	StAR-related lipid transfer protein 13 OS=Homo sapiens OX=9606 GN=STARD13 PE=1 SV=2	STARD13	124.97	0	0	0	0	0	0
Biological Process	GO:0010631	5	epithelial cell migration	2.34	0.000559652	P55290	Cadherin-13 OS=Homo sapiens OX=9606 GN=CDH13 PE=1 SV=1	CDH13	78.286	0	0	0	0	0	0
Biological Process	GO:0010631	5	epithelial cell migration	2.34	0.000559652	P13646	Keratin, type I cytoskeletal 13 OS=Homo sapiens OX=9606 GN=KRT13 PE=1 SV=4	KRT13	49.588	6.6	1	2	1	1	681050
Biological Process	GO:1901880	7	negative regulation of protein depolymerization	4.26	0.000564919	O15195	Villin-like protein OS=Homo sapiens OX=9606 GN=VILL PE=1 SV=3	VILL	95.906	3.4	2	2	2	2	17286000
Biological Process	GO:1901880	7	negative regulation of protein depolymerization	4.26	0.000564919	P04792	Heat shock protein beta-1 OS=Homo sapiens OX=9606 GN=HSPB1 PE=1 SV=2	HSPB1	22.782	7.8	1	1	1	1	1730200
Biological Process	GO:1901880	7	negative regulation of protein depolymerization	4.26	0.000564919	P06396	Gelsolin OS=Homo sapiens OX=9606 GN=GSN PE=1 SV=1	GSN	85.696	0	0	0	0	0	0
Biological Process	GO:1901880	7	negative regulation of protein depolymerization	4.26	0.000564919	P40121	Macrophage-capping protein OS=Homo sapiens OX=9606 GN=CAPG PE=1 SV=2	CAPG	38.498	0	0	0	0	0	0
Biological Process	GO:1901880	7	negative regulation of protein depolymerization	4.26	0.000564919	P47756	F-actin-capping protein subunit beta OS=Homo sapiens OX=9606 GN=CAPZB PE=1 SV=5	CAPZB	30.628	0	0	0	0	0	0
Biological Process	GO:1901880	7	negative regulation of protein depolymerization	4.26	0.000564919	P52907	F-actin-capping protein subunit alpha-1 OS=Homo sapiens OX=9606 GN=CAPZA1 PE=1 SV=3	CAPZA1	32.922	0	0	0	0	0	0
Biological Process	GO:1901880	7	negative regulation of protein depolymerization	4.26	0.000564919	Q15149	Plectin OS=Homo sapiens OX=9606 GN=PLEC PE=1 SV=3	PLEC	531.78	0	0	0	0	0	0
Biological Process	GO:1901880	7	negative regulation of protein depolymerization	4.26	0.000564919	Q6IQ55	Tau-tubulin kinase 2 OS=Homo sapiens OX=9606 GN=TTBK2 PE=1 SV=2	TTBK2	137.41	1.1	1	1	1	1	0
Biological Process	GO:0009743	4	response to carbohydrate	2.4	0.000568407	O75460	Serine/threonine-protein kinase/endoribonuclease IRE1 OS=Homo sapiens OX=9606 GN=ERN1 PE=1 SV=2	ERN1	109.73	0.9	2	1	1	1	118360000
Biological Process	GO:0009743	4	response to carbohydrate	2.4	0.000568407	P00338	L-lactate dehydrogenase A chain OS=Homo sapiens OX=9606 GN=LDHA PE=1 SV=2	LDHA	36.688	0	0	0	0	0	0
Biological Process	GO:0009743	4	response to carbohydrate	2.4	0.000568407	P00738	Haptoglobin OS=Homo sapiens OX=9606 GN=HP PE=1 SV=1	HP	45.205	53.7	182	24	13	24	96502000000
Biological Process	GO:0009743	4	response to carbohydrate	2.4	0.000568407	P00739	Haptoglobin-related protein OS=Homo sapiens OX=9606 GN=HPR PE=2 SV=2	HPR	39.029	34.2	5	14	3	3	169590000
Biological Process	GO:0009743	4	response to carbohydrate	2.4	0.000568407	P02652	Apolipoprotein A-II OS=Homo sapiens OX=9606 GN=APOA2 PE=1 SV=1	APOA2	11.175	19	7	3	3	3	7512000000
Biological Process	GO:0009743	4	response to carbohydrate	2.4	0.000568407	P02656	Apolipoprotein C-III OS=Homo sapiens OX=9606 GN=APOC3 PE=1 SV=1	APOC3	10.852	0	0	0	0	0	0
Biological Process	GO:0009743	4	response to carbohydrate	2.4	0.000568407	P04040	Catalase OS=Homo sapiens OX=9606 GN=CAT PE=1 SV=3	CAT	59.755	8.7	2	2	2	2	7648000
Biological Process	GO:0009743	4	response to carbohydrate	2.4	0.000568407	P05362	Intercellular adhesion molecule 1 OS=Homo sapiens OX=9606 GN=ICAM1 PE=1 SV=2	ICAM1	57.825	0	0	0	0	0	0
Biological Process	GO:0009743	4	response to carbohydrate	2.4	0.000568407	P09211	Glutathione S-transferase P OS=Homo sapiens OX=9606 GN=GSTP1 PE=1 SV=2	GSTP1	23.356	0	0	0	0	0	0
Biological Process	GO:0009743	4	response to carbohydrate	2.4	0.000568407	P10599	Thioredoxin OS=Homo sapiens OX=9606 GN=TXN PE=1 SV=3	TXN	11.737	0	0	0	0	0	0
Biological Process	GO:0009743	4	response to carbohydrate	2.4	0.000568407	P14618	Pyruvate kinase PKM OS=Homo sapiens OX=9606 GN=PKM PE=1 SV=4	PKM	57.936	0	0	0	0	0	0
Biological Process	GO:0009743	4	response to carbohydrate	2.4	0.000568407	P17174	Aspartate aminotransferase, cytoplasmic OS=Homo sapiens OX=9606 GN=GOT1 PE=1 SV=3	GOT1	46.247	3.6	1	1	1	1	3070800
Biological Process	GO:0043408	6	regulation of MAPK cascade	1.68	0.00053481	Q9UIV8	Serpin B13 OS=Homo sapiens OX=9606 GN=SERPINB13 PE=1 SV=2	SERPINB13	44.276	0	0	0	0	0	0
Biological Process	GO:0043408	6	regulation of MAPK cascade	1.68	0.00053481	Q9UHA4	Ragulator complex protein LAMTOR3 OS=Homo sapiens OX=9606 GN=LAMTOR3 PE=1 SV=1	LAMTOR3	13.623	0	0	0	0	0	0
Biological Process	GO:0043408	6	regulation of MAPK cascade	1.68	0.00053481	Q96P63	Serpin B12 OS=Homo sapiens OX=9606 GN=SERPINB12 PE=1 SV=1	SERPINB12	46.276	3	1	1	1	1	3836800
Biological Process	GO:0043068	6	positive regulation of programmed cell death	1.74	0.000511947	P98174	FYVE, RhoGEF and PH domain-containing protein 1 OS=Homo sapiens OX=9606 GN=FGD1 PE=1 SV=2	FGD1	106.56	0	0	0	0	0	0
Biological Process	GO:0043068	6	positive regulation of programmed cell death	1.74	0.000511947	Q96QA5	Gasdermin-A OS=Homo sapiens OX=9606 GN=GSDMA PE=1 SV=4	GSDMA	49.364	0	0	0	0	0	0
Biological Process	GO:0046365	4	monosaccharide catabolic process	4.31	0.000515736	P00338	L-lactate dehydrogenase A chain OS=Homo sapiens OX=9606 GN=LDHA PE=1 SV=2	LDHA	36.688	0	0	0	0	0	0
Biological Process	GO:0046365	4	monosaccharide catabolic process	4.31	0.000515736	P00558	Phosphoglycerate kinase 1 OS=Homo sapiens OX=9606 GN=PGK1 PE=1 SV=3	PGK1	44.614	0	0	0	0	0	0
Biological Process	GO:0046365	4	monosaccharide catabolic process	4.31	0.000515736	P04075	Fructose-bisphosphate aldolase A OS=Homo sapiens OX=9606 GN=ALDOA PE=1 SV=2	ALDOA	39.42	4.9	1	1	1	1	12992000
Biological Process	GO:0046365	4	monosaccharide catabolic process	4.31	0.000515736	P04406	Glyceraldehyde-3-phosphate dehydrogenase OS=Homo sapiens OX=9606 GN=GAPDH PE=1 SV=3	GAPDH	36.053	28.7	5	6	6	6	28325000
Biological Process	GO:0046365	4	monosaccharide catabolic process	4.31	0.000515736	P06733	Alpha-enolase OS=Homo sapiens OX=9606 GN=ENO1 PE=1 SV=2	ENO1	47.168	4.4	1	1	1	1	3345600
Biological Process	GO:0046365	4	monosaccharide catabolic process	4.31	0.000515736	P15259	Phosphoglycerate mutase 2 OS=Homo sapiens OX=9606 GN=PGAM2 PE=1 SV=3	PGAM2	28.766	0	0	0	0	0	0
Biological Process	GO:0046365	4	monosaccharide catabolic process	4.31	0.000515736	P60174	Triosephosphate isomerase OS=Homo sapiens OX=9606 GN=TPI1 PE=1 SV=4	TPI1	26.669	0	0	0	0	0	0
Biological Process	GO:0046365	4	monosaccharide catabolic process	4.31	0.000515736	P07738	Bisphosphoglycerate mutase OS=Homo sapiens OX=9606 GN=BPGM PE=1 SV=2	BPGM	30.005	0	0	0	0	0	0
Biological Process	GO:0030036	3	actin cytoskeleton organization	1.88	0.000534333	O15144	Actin-related protein 2/3 complex subunit 2 OS=Homo sapiens OX=9606 GN=ARPC2 PE=1 SV=1	ARPC2	34.333	0	0	0	0	0	0
Biological Process	GO:0030036	3	actin cytoskeleton organization	1.88	0.000534333	O15195	Villin-like protein OS=Homo sapiens OX=9606 GN=VILL PE=1 SV=3	VILL	95.906	3.4	2	2	2	2	17286000
Biological Process	GO:0030036	3	actin cytoskeleton organization	1.88	0.000534333	O43707	Alpha-actinin-4 OS=Homo sapiens OX=9606 GN=ACTN4 PE=1 SV=2	ACTN4	104.85	0	0	0	0	0	0
Biological Process	GO:0030036	3	actin cytoskeleton organization	1.88	0.000534333	O75369	Filamin-B OS=Homo sapiens OX=9606 GN=FLNB PE=1 SV=2	FLNB	278.16	0	0	0	0	0	0
Biological Process	GO:0030036	3	actin cytoskeleton organization	1.88	0.000534333	P02787	Serotransferrin OS=Homo sapiens OX=9606 GN=TF PE=1 SV=4	TF	77.049	60.5	160	43	43	43	50131000000
Biological Process	GO:0030036	3	actin cytoskeleton organization	1.88	0.000534333	P04075	Fructose-bisphosphate aldolase A OS=Homo sapiens OX=9606 GN=ALDOA PE=1 SV=2	ALDOA	39.42	4.9	1	1	1	1	12992000
Biological Process	GO:0030036	3	actin cytoskeleton organization	1.88	0.000534333	P04083	Annexin A1 OS=Homo sapiens OX=9606 GN=ANXA1 PE=1 SV=2	ANXA1	38.714	0	0	0	0	0	0
Biological Process	GO:0030036	3	actin cytoskeleton organization	1.88	0.000534333	P05556	Integrin beta-1 OS=Homo sapiens OX=9606 GN=ITGB1 PE=1 SV=2	ITGB1	88.414	0	0	0	0	0	0
Biological Process	GO:0030036	3	actin cytoskeleton organization	1.88	0.000534333	P06396	Gelsolin OS=Homo sapiens OX=9606 GN=GSN PE=1 SV=1	GSN	85.696	0	0	0	0	0	0
Biological Process	GO:0030036	3	actin cytoskeleton organization	1.88	0.000534333	P06702	Protein S100-A9 OS=Homo sapiens OX=9606 GN=S100A9 PE=1 SV=1	S100A9	13.242	43	4	3	3	3	31021000
Biological Process	GO:0030036	3	actin cytoskeleton organization	1.88	0.000534333	P67936	Tropomyosin alpha-4 chain OS=Homo sapiens OX=9606 GN=TPM4 PE=1 SV=3	TPM4	28.521	0	0	0	0	0	0
Biological Process	GO:0030036	3	actin cytoskeleton organization	1.88	0.000534333	P07384	Calpain-1 catalytic subunit OS=Homo sapiens OX=9606 GN=CAPN1 PE=1 SV=1	CAPN1	81.889	0	0	0	0	0	0
Biological Process	GO:0030036	3	actin cytoskeleton organization	1.88	0.000534333	P08727	Keratin, type I cytoskeletal 19 OS=Homo sapiens OX=9606 GN=KRT19 PE=1 SV=4	KRT19	44.105	0	0	0	0	0	0
Biological Process	GO:0043068	6	positive regulation of programmed cell death	1.74	0.000511947	Q9BZF9	Uveal autoantigen with coiled-coil domains and ankyrin repeats OS=Homo sapiens OX=9606 GN=UACA PE=1 SV=2	UACA	162.5	0	0	0	0	0	0
Biological Process	GO:0030036	3	actin cytoskeleton organization	1.88	0.000534333	P09619	Platelet-derived growth factor receptor beta OS=Homo sapiens OX=9606 GN=PDGFRB PE=1 SV=1	PDGFRB	123.97	2.9	3	2	2	2	4182400
Biological Process	GO:0043068	6	positive regulation of programmed cell death	1.74	0.000511947	O75340	Programmed cell death protein 6 OS=Homo sapiens OX=9606 GN=PDCD6 PE=1 SV=1	PDCD6	21.868	0	0	0	0	0	0
Biological Process	GO:0043068	6	positive regulation of programmed cell death	1.74	0.000511947	Q9Y261	Hepatocyte nuclear factor 3-beta OS=Homo sapiens OX=9606 GN=FOXA2 PE=1 SV=1	FOXA2	48.306	0	0	0	0	0	0
Biological Process	GO:0043068	6	positive regulation of programmed cell death	1.74	0.000511947	P09619	Platelet-derived growth factor receptor beta OS=Homo sapiens OX=9606 GN=PDGFRB PE=1 SV=1	PDGFRB	123.97	2.9	3	2	2	2	4182400
Biological Process	GO:0043068	6	positive regulation of programmed cell death	1.74	0.000511947	P62987	Ubiquitin-60S ribosomal protein L40 OS=Homo sapiens OX=9606 GN=UBA52 PE=1 SV=2	UBA52	14.728	39.1	7	6	6	6	90657000
Biological Process	GO:0043068	6	positive regulation of programmed cell death	1.74	0.000511947	P10809	60 kDa heat shock protein, mitochondrial OS=Homo sapiens OX=9606 GN=HSPD1 PE=1 SV=2	HSPD1	61.054	0	0	0	0	0	0
Biological Process	GO:0043068	6	positive regulation of programmed cell death	1.74	0.000511947	P11388	DNA topoisomerase 2-alpha OS=Homo sapiens OX=9606 GN=TOP2A PE=1 SV=3	TOP2A	174.38	0	0	0	0	0	0
Biological Process	GO:0043068	6	positive regulation of programmed cell death	1.74	0.000511947	P15291	Beta-1,4-galactosyltransferase 1 OS=Homo sapiens OX=9606 GN=B4GALT1 PE=1 SV=5	B4GALT1	43.92	0	0	0	0	0	0
Biological Process	GO:0043068	6	positive regulation of programmed cell death	1.74	0.000511947	P16070	CD44 antigen OS=Homo sapiens OX=9606 GN=CD44 PE=1 SV=3	CD44	81.537	3	2	2	2	2	118550000
Biological Process	GO:0043068	6	positive regulation of programmed cell death	1.74	0.000511947	P16885	1-phosphatidylinositol 4,5-bisphosphate phosphodiesterase gamma-2 OS=Homo sapiens OX=9606 GN=PLCG2 PE=1 SV=4	PLCG2	147.87	0	0	0	0	0	0
Biological Process	GO:0043068	6	positive regulation of programmed cell death	1.74	0.000511947	P21281	V-type proton ATPase subunit B, brain isoform OS=Homo sapiens OX=9606 GN=ATP6V1B2 PE=1 SV=3	ATP6V1B2	56.5	0	0	0	0	0	0
Biological Process	GO:0043068	6	positive regulation of programmed cell death	1.74	0.000511947	P27487	Dipeptidyl peptidase 4 OS=Homo sapiens OX=9606 GN=DPP4 PE=1 SV=2	DPP4	88.278	15	7	8	8	8	79452000
Biological Process	GO:0043068	6	positive regulation of programmed cell death	1.74	0.000511947	P30101	Protein disulfide-isomerase A3 OS=Homo sapiens OX=9606 GN=PDIA3 PE=1 SV=4	PDIA3	56.782	0	0	0	0	0	0
Biological Process	GO:0043068	6	positive regulation of programmed cell death	1.74	0.000511947	P31947	14-3-3 protein sigma OS=Homo sapiens OX=9606 GN=SFN PE=1 SV=1	SFN	27.774	0	0	0	0	0	0
Biological Process	GO:0043068	6	positive regulation of programmed cell death	1.74	0.000511947	P42224	Signal transducer and activator of transcription 1-alpha/beta OS=Homo sapiens OX=9606 GN=STAT1 PE=1 SV=2	STAT1	87.334	0	0	0	0	0	0
Biological Process	GO:0043068	6	positive regulation of programmed cell death	1.74	0.000511947	P49662	Caspase-4 OS=Homo sapiens OX=9606 GN=CASP4 PE=1 SV=1	CASP4	43.262	4	6	1	1	1	29842000
Biological Process	GO:0043068	6	positive regulation of programmed cell death	1.74	0.000511947	Q05193	Dynamin-1 OS=Homo sapiens OX=9606 GN=DNM1 PE=1 SV=2	DNM1	97.407	0	0	0	0	0	0
Biological Process	GO:0043068	6	positive regulation of programmed cell death	1.74	0.000511947	P53634	Dipeptidyl peptidase 1 OS=Homo sapiens OX=9606 GN=CTSC PE=1 SV=2	CTSC	51.853	0	0	0	0	0	0
Biological Process	GO:0043068	6	positive regulation of programmed cell death	1.74	0.000511947	P55072	Transitional endoplasmic reticulum ATPase OS=Homo sapiens OX=9606 GN=VCP PE=1 SV=4	VCP	89.321	0	0	0	0	0	0
Biological Process	GO:0043068	6	positive regulation of programmed cell death	1.74	0.000511947	P61981	14-3-3 protein gamma OS=Homo sapiens OX=9606 GN=YWHAG PE=1 SV=2	YWHAG	28.302	0	0	0	0	0	0
Biological Process	GO:0043068	6	positive regulation of programmed cell death	1.74	0.000511947	P62081	40S ribosomal protein S7 OS=Homo sapiens OX=9606 GN=RPS7 PE=1 SV=1	RPS7	22.127	0	0	0	0	0	0
Biological Process	GO:0043068	6	positive regulation of programmed cell death	1.74	0.000511947	P62258	14-3-3 protein epsilon OS=Homo sapiens OX=9606 GN=YWHAE PE=1 SV=1	YWHAE	29.174	0	0	0	0	0	0
Biological Process	GO:0043068	6	positive regulation of programmed cell death	1.74	0.000511947	P63104	14-3-3 protein zeta/delta OS=Homo sapiens OX=9606 GN=YWHAZ PE=1 SV=1	YWHAZ	27.745	0	0	0	0	0	0
Biological Process	GO:0043068	6	positive regulation of programmed cell death	1.74	0.000511947	P63244	Receptor of activated protein C kinase 1 OS=Homo sapiens OX=9606 GN=RACK1 PE=1 SV=3	RACK1	35.076	0	0	0	0	0	0
Biological Process	GO:0043068	6	positive regulation of programmed cell death	1.74	0.000511947	P80108	Phosphatidylinositol-glycan-specific phospholipase D OS=Homo sapiens OX=9606 GN=GPLD1 PE=1 SV=3	GPLD1	92.335	7.7	5	5	5	5	109680000
Biological Process	GO:0043068	6	positive regulation of programmed cell death	1.74	0.000511947	Q15149	Plectin OS=Homo sapiens OX=9606 GN=PLEC PE=1 SV=3	PLEC	531.78	0	0	0	0	0	0
Biological Process	GO:0043068	6	positive regulation of programmed cell death	1.74	0.000511947	Q9Y3M8	StAR-related lipid transfer protein 13 OS=Homo sapiens OX=9606 GN=STARD13 PE=1 SV=2	STARD13	124.97	0	0	0	0	0	0
Biological Process	GO:0030036	3	actin cytoskeleton organization	1.88	0.000534333	P13797	Plastin-3 OS=Homo sapiens OX=9606 GN=PLS3 PE=1 SV=4	PLS3	70.81	0	0	0	0	0	0
Biological Process	GO:0030036	3	actin cytoskeleton organization	1.88	0.000534333	P21333	Filamin-A OS=Homo sapiens OX=9606 GN=FLNA PE=1 SV=4	FLNA	280.74	0	0	0	0	0	0
Biological Process	GO:0030036	3	actin cytoskeleton organization	1.88	0.000534333	P35579	Myosin-9 OS=Homo sapiens OX=9606 GN=MYH9 PE=1 SV=4	MYH9	226.53	1.8	2	2	2	2	2939500
Biological Process	GO:0043408	6	regulation of MAPK cascade	1.68	0.00053481	P08697	Alpha-2-antiplasmin OS=Homo sapiens OX=9606 GN=SERPINF2 PE=1 SV=3	SERPINF2	54.565	17.9	7	6	6	6	283750000
Biological Process	GO:0043408	6	regulation of MAPK cascade	1.68	0.00053481	P09211	Glutathione S-transferase P OS=Homo sapiens OX=9606 GN=GSTP1 PE=1 SV=2	GSTP1	23.356	0	0	0	0	0	0
Biological Process	GO:0043408	6	regulation of MAPK cascade	1.68	0.00053481	P09619	Platelet-derived growth factor receptor beta OS=Homo sapiens OX=9606 GN=PDGFRB PE=1 SV=1	PDGFRB	123.97	2.9	3	2	2	2	4182400
Biological Process	GO:0043408	6	regulation of MAPK cascade	1.68	0.00053481	P0C0L5	Complement C4-B OS=Homo sapiens OX=9606 GN=C4B_2 PE=1 SV=2	C4B_2	192.75	2.9	4	3	3	3	50961000
Biological Process	GO:0043408	6	regulation of MAPK cascade	1.68	0.00053481	P62987	Ubiquitin-60S ribosomal protein L40 OS=Homo sapiens OX=9606 GN=UBA52 PE=1 SV=2	UBA52	14.728	39.1	7	6	6	6	90657000
Biological Process	GO:0043408	6	regulation of MAPK cascade	1.68	0.00053481	P14174	Macrophage migration inhibitory factor OS=Homo sapiens OX=9606 GN=MIF PE=1 SV=4	MIF	12.476	0	0	0	0	0	0
Biological Process	GO:0043408	6	regulation of MAPK cascade	1.68	0.00053481	P16070	CD44 antigen OS=Homo sapiens OX=9606 GN=CD44 PE=1 SV=3	CD44	81.537	3	2	2	2	2	118550000
Biological Process	GO:0043408	6	regulation of MAPK cascade	1.68	0.00053481	P18510	Interleukin-1 receptor antagonist protein OS=Homo sapiens OX=9606 GN=IL1RN PE=1 SV=1	IL1RN	20.055	0	0	0	0	0	0
Biological Process	GO:0043408	6	regulation of MAPK cascade	1.68	0.00053481	P29508	Serpin B3 OS=Homo sapiens OX=9606 GN=SERPINB3 PE=1 SV=2	SERPINB3	44.564	0	0	0	0	0	0
Biological Process	GO:0043408	6	regulation of MAPK cascade	1.68	0.00053481	P30086	Phosphatidylethanolamine-binding protein 1 OS=Homo sapiens OX=9606 GN=PEBP1 PE=1 SV=3	PEBP1	21.057	0	0	0	0	0	0
Biological Process	GO:0043408	6	regulation of MAPK cascade	1.68	0.00053481	P30740	Leukocyte elastase inhibitor OS=Homo sapiens OX=9606 GN=SERPINB1 PE=1 SV=1	SERPINB1	42.741	0	0	0	0	0	0
Biological Process	GO:0043408	6	regulation of MAPK cascade	1.68	0.00053481	P31151	Protein S100-A7 OS=Homo sapiens OX=9606 GN=S100A7 PE=1 SV=4	S100A7	11.471	14.9	5	3	3	3	18159000
Biological Process	GO:0043408	6	regulation of MAPK cascade	1.68	0.00053481	P32119	Peroxiredoxin-2 OS=Homo sapiens OX=9606 GN=PRDX2 PE=1 SV=5	PRDX2	21.892	0	0	0	0	0	0
Biological Process	GO:0043408	6	regulation of MAPK cascade	1.68	0.00053481	P35232	Prohibitin 1 OS=Homo sapiens OX=9606 GN=PHB1 PE=1 SV=1	PHB1	29.804	0	0	0	0	0	0
Biological Process	GO:0043408	6	regulation of MAPK cascade	1.68	0.00053481	P35579	Myosin-9 OS=Homo sapiens OX=9606 GN=MYH9 PE=1 SV=4	MYH9	226.53	1.8	2	2	2	2	2939500
Biological Process	GO:0043408	6	regulation of MAPK cascade	1.68	0.00053481	P47756	F-actin-capping protein subunit beta OS=Homo sapiens OX=9606 GN=CAPZB PE=1 SV=5	CAPZB	30.628	0	0	0	0	0	0
Biological Process	GO:0043408	6	regulation of MAPK cascade	1.68	0.00053481	P52907	F-actin-capping protein subunit alpha-1 OS=Homo sapiens OX=9606 GN=CAPZA1 PE=1 SV=3	CAPZA1	32.922	0	0	0	0	0	0
Biological Process	GO:0043408	6	regulation of MAPK cascade	1.68	0.00053481	P80511	Protein S100-A12 OS=Homo sapiens OX=9606 GN=S100A12 PE=1 SV=2	S100A12	10.575	0	0	0	0	0	0
Biological Process	GO:0043408	6	regulation of MAPK cascade	1.68	0.00053481	Q06830	Peroxiredoxin-1 OS=Homo sapiens OX=9606 GN=PRDX1 PE=1 SV=1	PRDX1	22.11	9	1	1	1	1	1860400
Biological Process	GO:0043408	6	regulation of MAPK cascade	1.68	0.00053481	Q12913	Receptor-type tyrosine-protein phosphatase eta OS=Homo sapiens OX=9606 GN=PTPRJ PE=1 SV=3	PTPRJ	145.94	2.7	3	3	3	3	26199000
Biological Process	GO:0043408	6	regulation of MAPK cascade	1.68	0.00053481	Q86SG5	Protein S100-A7A OS=Homo sapiens OX=9606 GN=S100A7A PE=1 SV=3	S100A7A	11.305	0	0	0	0	0	0
Biological Process	GO:0043408	6	regulation of MAPK cascade	1.68	0.00053481	Q8TDY2	RB1-inducible coiled-coil protein 1 OS=Homo sapiens OX=9606 GN=RB1CC1 PE=1 SV=3	RB1CC1	183.09	0	0	0	0	0	0
Biological Process	GO:0043408	6	regulation of MAPK cascade	1.68	0.00053481	Q969H8	Myeloid-derived growth factor OS=Homo sapiens OX=9606 GN=MYDGF PE=1 SV=1	MYDGF	18.795	0	0	0	0	0	0
Biological Process	GO:0043408	6	regulation of MAPK cascade	1.68	0.00053481	P07333	Macrophage colony-stimulating factor 1 receptor OS=Homo sapiens OX=9606 GN=CSF1R PE=1 SV=2	CSF1R	107.98	2.2	2	2	2	2	24589000
Biological Process	GO:0043408	6	regulation of MAPK cascade	1.68	0.00053481	P05556	Integrin beta-1 OS=Homo sapiens OX=9606 GN=ITGB1 PE=1 SV=2	ITGB1	88.414	0	0	0	0	0	0
Biological Process	GO:0043408	6	regulation of MAPK cascade	1.68	0.00053481	P05362	Intercellular adhesion molecule 1 OS=Homo sapiens OX=9606 GN=ICAM1 PE=1 SV=2	ICAM1	57.825	0	0	0	0	0	0
Biological Process	GO:0043408	6	regulation of MAPK cascade	1.68	0.00053481	P02787	Serotransferrin OS=Homo sapiens OX=9606 GN=TF PE=1 SV=4	TF	77.049	60.5	160	43	43	43	50131000000
Biological Process	GO:0030036	3	actin cytoskeleton organization	1.88	0.000534333	P47756	F-actin-capping protein subunit beta OS=Homo sapiens OX=9606 GN=CAPZB PE=1 SV=5	CAPZB	30.628	0	0	0	0	0	0
Biological Process	GO:0030036	3	actin cytoskeleton organization	1.88	0.000534333	P49662	Caspase-4 OS=Homo sapiens OX=9606 GN=CASP4 PE=1 SV=1	CASP4	43.262	4	6	1	1	1	29842000
Biological Process	GO:0030036	3	actin cytoskeleton organization	1.88	0.000534333	Q05193	Dynamin-1 OS=Homo sapiens OX=9606 GN=DNM1 PE=1 SV=2	DNM1	97.407	0	0	0	0	0	0
Biological Process	GO:0030036	3	actin cytoskeleton organization	1.88	0.000534333	P52907	F-actin-capping protein subunit alpha-1 OS=Homo sapiens OX=9606 GN=CAPZA1 PE=1 SV=3	CAPZA1	32.922	0	0	0	0	0	0
Biological Process	GO:0030036	3	actin cytoskeleton organization	1.88	0.000534333	P63261	Actin, cytoplasmic 2 OS=Homo sapiens OX=9606 GN=ACTG1 PE=1 SV=1	ACTG1	41.792	9.3	1	3	3	3	4758900
Biological Process	GO:0030036	3	actin cytoskeleton organization	1.88	0.000534333	P62826	GTP-binding nuclear protein Ran OS=Homo sapiens OX=9606 GN=RAN PE=1 SV=3	RAN	24.423	0	0	0	0	0	0
Biological Process	GO:0030036	3	actin cytoskeleton organization	1.88	0.000534333	P68133	Actin, alpha skeletal muscle OS=Homo sapiens OX=9606 GN=ACTA1 PE=1 SV=1	ACTA1	42.051	0	0	0	0	0	0
Biological Process	GO:0030036	3	actin cytoskeleton organization	1.88	0.000534333	Q15149	Plectin OS=Homo sapiens OX=9606 GN=PLEC PE=1 SV=3	PLEC	531.78	0	0	0	0	0	0
Biological Process	GO:0030036	3	actin cytoskeleton organization	1.88	0.000534333	Q16658	Fascin OS=Homo sapiens OX=9606 GN=FSCN1 PE=1 SV=3	FSCN1	54.529	0	0	0	0	0	0
Biological Process	GO:0030036	3	actin cytoskeleton organization	1.88	0.000534333	Q8IUG5	Unconventional myosin-XVIIIb OS=Homo sapiens OX=9606 GN=MYO18B PE=1 SV=2	MYO18B	285.21	0	0	0	0	0	0
Biological Process	GO:0030036	3	actin cytoskeleton organization	1.88	0.000534333	Q8WVV4	Protein POF1B OS=Homo sapiens OX=9606 GN=POF1B PE=1 SV=3	POF1B	68.064	0	0	0	0	0	0
Biological Process	GO:0043068	6	positive regulation of programmed cell death	1.74	0.000511947	P06396	Gelsolin OS=Homo sapiens OX=9606 GN=GSN PE=1 SV=1	GSN	85.696	0	0	0	0	0	0
Biological Process	GO:0030036	3	actin cytoskeleton organization	1.88	0.000534333	Q9Y3M8	StAR-related lipid transfer protein 13 OS=Homo sapiens OX=9606 GN=STARD13 PE=1 SV=2	STARD13	124.97	0	0	0	0	0	0
Biological Process	GO:0030036	3	actin cytoskeleton organization	1.88	0.000534333	Q9NZQ9	Tropomodulin-4 OS=Homo sapiens OX=9606 GN=TMOD4 PE=1 SV=1	TMOD4	39.335	2.9	2	1	1	1	105740000
Biological Process	GO:0030036	3	actin cytoskeleton organization	1.88	0.000534333	P98174	FYVE, RhoGEF and PH domain-containing protein 1 OS=Homo sapiens OX=9606 GN=FGD1 PE=1 SV=2	FGD1	106.56	0	0	0	0	0	0
Biological Process	GO:0030036	3	actin cytoskeleton organization	1.88	0.000534333	P29536	Leiomodin-1 OS=Homo sapiens OX=9606 GN=LMOD1 PE=1 SV=3	LMOD1	67.029	1.7	1	1	1	1	5208900
Biological Process	GO:0030036	3	actin cytoskeleton organization	1.88	0.000534333	Q8N1I0	Dedicator of cytokinesis protein 4 OS=Homo sapiens OX=9606 GN=DOCK4 PE=1 SV=3	DOCK4	225.2	0.5	1	1	1	1	0
Biological Process	GO:0043408	6	regulation of MAPK cascade	1.68	0.00053481	O75460	Serine/threonine-protein kinase/endoribonuclease IRE1 OS=Homo sapiens OX=9606 GN=ERN1 PE=1 SV=2	ERN1	109.73	0.9	2	1	1	1	118360000
Biological Process	GO:0043408	6	regulation of MAPK cascade	1.68	0.00053481	P00441	Superoxide dismutase [Cu-Zn] OS=Homo sapiens OX=9606 GN=SOD1 PE=1 SV=2	SOD1	15.936	0	0	0	0	0	0
Biological Process	GO:0043408	6	regulation of MAPK cascade	1.68	0.00053481	P00533	Epidermal growth factor receptor OS=Homo sapiens OX=9606 GN=EGFR PE=1 SV=2	EGFR	134.28	0	0	0	0	0	0
Biological Process	GO:0043408	6	regulation of MAPK cascade	1.68	0.00053481	P01019	Angiotensinogen OS=Homo sapiens OX=9606 GN=AGT PE=1 SV=3	AGT	53.154	7.6	3	3	3	3	91548000
Biological Process	GO:0043408	6	regulation of MAPK cascade	1.68	0.00053481	P01024	Complement C3 OS=Homo sapiens OX=9606 GN=C3 PE=1 SV=2	C3	187.15	0	0	0	0	0	0
Biological Process	GO:0043408	6	regulation of MAPK cascade	1.68	0.00053481	P01042	Kininogen-1 OS=Homo sapiens OX=9606 GN=KNG1 PE=1 SV=2	KNG1	71.957	16.8	10	9	9	9	1803300000
Biological Process	GO:0043408	6	regulation of MAPK cascade	1.68	0.00053481	P02760	Protein AMBP OS=Homo sapiens OX=9606 GN=AMBP PE=1 SV=1	AMBP	38.999	31	10	8	8	8	794190000
Biological Process	GO:0030036	3	actin cytoskeleton organization	1.88	0.000534333	O60282	Kinesin heavy chain isoform 5C OS=Homo sapiens OX=9606 GN=KIF5C PE=1 SV=1	KIF5C	109.49	0.8	9	1	1	1	2190000000
Biological Process	GO:0045918	5	negative regulation of cytolysis	12.28	0.000232046	P02538	Keratin, type II cytoskeletal 6A OS=Homo sapiens OX=9606 GN=KRT6A PE=1 SV=3	KRT6A	60.044	42.4	3	24	2	2	61562000
Biological Process	GO:0001101	3	response to acid chemical	2.1	0.000223454	P13646	Keratin, type I cytoskeletal 13 OS=Homo sapiens OX=9606 GN=KRT13 PE=1 SV=4	KRT13	49.588	6.6	1	2	1	1	681050
Biological Process	GO:0001101	3	response to acid chemical	2.1	0.000223454	Q8IWV7	E3 ubiquitin-protein ligase UBR1 OS=Homo sapiens OX=9606 GN=UBR1 PE=1 SV=1	UBR1	200.21	0	0	0	0	0	0
Biological Process	GO:0044281	2	small molecule metabolic process	1.54	9.23484e-05	P11597	Cholesteryl ester transfer protein OS=Homo sapiens OX=9606 GN=CETP PE=1 SV=2	CETP	54.756	0	0	0	0	0	0
Biological Process	GO:0044281	2	small molecule metabolic process	1.54	9.23484e-05	Q70JA7	Chondroitin sulfate synthase 3 OS=Homo sapiens OX=9606 GN=CHSY3 PE=2 SV=3	CHSY3	100.28	0	0	0	0	0	0
Biological Process	GO:0044281	2	small molecule metabolic process	1.54	9.23484e-05	Q9Y4C1	Lysine-specific demethylase 3A OS=Homo sapiens OX=9606 GN=KDM3A PE=1 SV=4	KDM3A	147.34	1	1	1	1	1	33437000
Biological Process	GO:0044281	2	small molecule metabolic process	1.54	9.23484e-05	Q9Y5Y7	Lymphatic vessel endothelial hyaluronic acid receptor 1 OS=Homo sapiens OX=9606 GN=LYVE1 PE=1 SV=2	LYVE1	35.213	3.4	1	1	1	1	10091000
Biological Process	GO:0023052	1	signaling	1.26	9.26684e-05	O15144	Actin-related protein 2/3 complex subunit 2 OS=Homo sapiens OX=9606 GN=ARPC2 PE=1 SV=1	ARPC2	34.333	0	0	0	0	0	0
Biological Process	GO:0023052	1	signaling	1.26	9.26684e-05	O15195	Villin-like protein OS=Homo sapiens OX=9606 GN=VILL PE=1 SV=3	VILL	95.906	3.4	2	2	2	2	17286000
Biological Process	GO:0023052	1	signaling	1.26	9.26684e-05	O43707	Alpha-actinin-4 OS=Homo sapiens OX=9606 GN=ACTN4 PE=1 SV=2	ACTN4	104.85	0	0	0	0	0	0
Biological Process	GO:0023052	1	signaling	1.26	9.26684e-05	O75223	Gamma-glutamylcyclotransferase OS=Homo sapiens OX=9606 GN=GGCT PE=1 SV=1	GGCT	21.007	0	0	0	0	0	0
Biological Process	GO:0023052	1	signaling	1.26	9.26684e-05	O75369	Filamin-B OS=Homo sapiens OX=9606 GN=FLNB PE=1 SV=2	FLNB	278.16	0	0	0	0	0	0
Biological Process	GO:0023052	1	signaling	1.26	9.26684e-05	O75460	Serine/threonine-protein kinase/endoribonuclease IRE1 OS=Homo sapiens OX=9606 GN=ERN1 PE=1 SV=2	ERN1	109.73	0.9	2	1	1	1	118360000
Biological Process	GO:0023052	1	signaling	1.26	9.26684e-05	O75882	Attractin OS=Homo sapiens OX=9606 GN=ATRN PE=1 SV=2	ATRN	158.54	17.3	30	20	20	20	1296100000
Biological Process	GO:0023052	1	signaling	1.26	9.26684e-05	O95833	Chloride intracellular channel protein 3 OS=Homo sapiens OX=9606 GN=CLIC3 PE=1 SV=2	CLIC3	26.648	0	0	0	0	0	0
Biological Process	GO:0023052	1	signaling	1.26	9.26684e-05	P00441	Superoxide dismutase [Cu-Zn] OS=Homo sapiens OX=9606 GN=SOD1 PE=1 SV=2	SOD1	15.936	0	0	0	0	0	0
Biological Process	GO:0023052	1	signaling	1.26	9.26684e-05	P00533	Epidermal growth factor receptor OS=Homo sapiens OX=9606 GN=EGFR PE=1 SV=2	EGFR	134.28	0	0	0	0	0	0
Biological Process	GO:0023052	1	signaling	1.26	9.26684e-05	P00558	Phosphoglycerate kinase 1 OS=Homo sapiens OX=9606 GN=PGK1 PE=1 SV=3	PGK1	44.614	0	0	0	0	0	0
Biological Process	GO:0023052	1	signaling	1.26	9.26684e-05	P00738	Haptoglobin OS=Homo sapiens OX=9606 GN=HP PE=1 SV=1	HP	45.205	53.7	182	24	13	24	96502000000
Biological Process	GO:0023052	1	signaling	1.26	9.26684e-05	P00739	Haptoglobin-related protein OS=Homo sapiens OX=9606 GN=HPR PE=2 SV=2	HPR	39.029	34.2	5	14	3	3	169590000
Biological Process	GO:0023052	1	signaling	1.26	9.26684e-05	P00918	Carbonic anhydrase 2 OS=Homo sapiens OX=9606 GN=CA2 PE=1 SV=2	CA2	29.246	0	0	0	0	0	0
Biological Process	GO:0023052	1	signaling	1.26	9.26684e-05	P01019	Angiotensinogen OS=Homo sapiens OX=9606 GN=AGT PE=1 SV=3	AGT	53.154	7.6	3	3	3	3	91548000
Biological Process	GO:0023052	1	signaling	1.26	9.26684e-05	P01024	Complement C3 OS=Homo sapiens OX=9606 GN=C3 PE=1 SV=2	C3	187.15	0	0	0	0	0	0
Biological Process	GO:0023052	1	signaling	1.26	9.26684e-05	P01042	Kininogen-1 OS=Homo sapiens OX=9606 GN=KNG1 PE=1 SV=2	KNG1	71.957	16.8	10	9	9	9	1803300000
Biological Process	GO:0023052	1	signaling	1.26	9.26684e-05	P01857	Immunoglobulin heavy constant gamma 1 OS=Homo sapiens OX=9606 GN=IGHG1 PE=1 SV=1	IGHG1	36.105	20.3	2	4	2	2	31089000
Biological Process	GO:0023052	1	signaling	1.26	9.26684e-05	P01861	Immunoglobulin heavy constant gamma 4 OS=Homo sapiens OX=9606 GN=IGHG4 PE=1 SV=1	IGHG4	35.94	17.4	3	4	1	2	27336000
Biological Process	GO:0044281	2	small molecule metabolic process	1.54	9.23484e-05	P07738	Bisphosphoglycerate mutase OS=Homo sapiens OX=9606 GN=BPGM PE=1 SV=2	BPGM	30.005	0	0	0	0	0	0
Biological Process	GO:0023052	1	signaling	1.26	9.26684e-05	P02538	Keratin, type II cytoskeletal 6A OS=Homo sapiens OX=9606 GN=KRT6A PE=1 SV=3	KRT6A	60.044	42.4	3	24	2	2	61562000
Biological Process	GO:0044281	2	small molecule metabolic process	1.54	9.23484e-05	Q14916	Sodium-dependent phosphate transport protein 1 OS=Homo sapiens OX=9606 GN=SLC17A1 PE=1 SV=2	SLC17A1	51.131	0	0	0	0	0	0
Biological Process	GO:0044281	2	small molecule metabolic process	1.54	9.23484e-05	P48764	Sodium/hydrogen exchanger 3 OS=Homo sapiens OX=9606 GN=SLC9A3 PE=1 SV=2	SLC9A3	92.853	0	0	0	0	0	0
Biological Process	GO:0044281	2	small molecule metabolic process	1.54	9.23484e-05	P31930	Cytochrome b-c1 complex subunit 1, mitochondrial OS=Homo sapiens OX=9606 GN=UQCRC1 PE=1 SV=3	UQCRC1	52.645	0	0	0	0	0	0
Biological Process	GO:0044281	2	small molecule metabolic process	1.54	9.23484e-05	P37837	Transaldolase OS=Homo sapiens OX=9606 GN=TALDO1 PE=1 SV=2	TALDO1	37.54	0	0	0	0	0	0
Biological Process	GO:0044281	2	small molecule metabolic process	1.54	9.23484e-05	P40926	Malate dehydrogenase, mitochondrial OS=Homo sapiens OX=9606 GN=MDH2 PE=1 SV=3	MDH2	35.503	0	0	0	0	0	0
Biological Process	GO:0044281	2	small molecule metabolic process	1.54	9.23484e-05	P42357	Histidine ammonia-lyase OS=Homo sapiens OX=9606 GN=HAL PE=1 SV=1	HAL	72.697	0	0	0	0	0	0
Biological Process	GO:0044281	2	small molecule metabolic process	1.54	9.23484e-05	P43251	Biotinidase OS=Homo sapiens OX=9606 GN=BTD PE=1 SV=2	BTD	61.132	9.2	6	5	5	5	57996000
Biological Process	GO:0044281	2	small molecule metabolic process	1.54	9.23484e-05	P43490	Nicotinamide phosphoribosyltransferase OS=Homo sapiens OX=9606 GN=NAMPT PE=1 SV=1	NAMPT	55.52	0	0	0	0	0	0
Biological Process	GO:0044281	2	small molecule metabolic process	1.54	9.23484e-05	P51659	Peroxisomal multifunctional enzyme type 2 OS=Homo sapiens OX=9606 GN=HSD17B4 PE=1 SV=3	HSD17B4	79.685	0	0	0	0	0	0
Biological Process	GO:0044281	2	small molecule metabolic process	1.54	9.23484e-05	P51884	Lumican OS=Homo sapiens OX=9606 GN=LUM PE=1 SV=2	LUM	38.429	0	0	0	0	0	0
Biological Process	GO:0044281	2	small molecule metabolic process	1.54	9.23484e-05	P55058	Phospholipid transfer protein OS=Homo sapiens OX=9606 GN=PLTP PE=1 SV=1	PLTP	54.739	2.4	1	1	1	1	14243000
Biological Process	GO:0044281	2	small molecule metabolic process	1.54	9.23484e-05	P55072	Transitional endoplasmic reticulum ATPase OS=Homo sapiens OX=9606 GN=VCP PE=1 SV=4	VCP	89.321	0	0	0	0	0	0
Biological Process	GO:0044281	2	small molecule metabolic process	1.54	9.23484e-05	P60174	Triosephosphate isomerase OS=Homo sapiens OX=9606 GN=TPI1 PE=1 SV=4	TPI1	26.669	0	0	0	0	0	0
Biological Process	GO:0044281	2	small molecule metabolic process	1.54	9.23484e-05	P62826	GTP-binding nuclear protein Ran OS=Homo sapiens OX=9606 GN=RAN PE=1 SV=3	RAN	24.423	0	0	0	0	0	0
Biological Process	GO:0044281	2	small molecule metabolic process	1.54	9.23484e-05	P78417	Glutathione S-transferase omega-1 OS=Homo sapiens OX=9606 GN=GSTO1 PE=1 SV=2	GSTO1	27.566	0	0	0	0	0	0
Biological Process	GO:0044281	2	small molecule metabolic process	1.54	9.23484e-05	Q01469	Fatty acid-binding protein 5 OS=Homo sapiens OX=9606 GN=FABP5 PE=1 SV=3	FABP5	15.164	0	0	0	0	0	0
Biological Process	GO:0044281	2	small molecule metabolic process	1.54	9.23484e-05	Q03426	Mevalonate kinase OS=Homo sapiens OX=9606 GN=MVK PE=1 SV=1	MVK	42.45	0	0	0	0	0	0
Biological Process	GO:0044281	2	small molecule metabolic process	1.54	9.23484e-05	Q10588	ADP-ribosyl cyclase/cyclic ADP-ribose hydrolase 2 OS=Homo sapiens OX=9606 GN=BST1 PE=1 SV=2	BST1	35.724	7.9	2	2	2	2	26770000
Biological Process	GO:0044281	2	small molecule metabolic process	1.54	9.23484e-05	Q15181	Inorganic pyrophosphatase OS=Homo sapiens OX=9606 GN=PPA1 PE=1 SV=2	PPA1	32.66	0	0	0	0	0	0
Biological Process	GO:0044281	2	small molecule metabolic process	1.54	9.23484e-05	Q6BCY4	NADH-cytochrome b5 reductase 2 OS=Homo sapiens OX=9606 GN=CYB5R2 PE=1 SV=1	CYB5R2	31.458	0	0	0	0	0	0
Biological Process	GO:0044281	2	small molecule metabolic process	1.54	9.23484e-05	Q8NCI6	Beta-galactosidase-1-like protein 3 OS=Homo sapiens OX=9606 GN=GLB1L3 PE=2 SV=3	GLB1L3	74.822	0	0	0	0	0	0
Biological Process	GO:0044281	2	small molecule metabolic process	1.54	9.23484e-05	Q8NCQ7	Protein PROCA1 OS=Homo sapiens OX=9606 GN=PROCA1 PE=1 SV=3	PROCA1	40.506	0	0	0	0	0	0
Biological Process	GO:0044281	2	small molecule metabolic process	1.54	9.23484e-05	Q92820	Gamma-glutamyl hydrolase OS=Homo sapiens OX=9606 GN=GGH PE=1 SV=2	GGH	35.964	9.4	4	3	3	3	38423000
Biological Process	GO:0044281	2	small molecule metabolic process	1.54	9.23484e-05	Q9H4A9	Dipeptidase 2 OS=Homo sapiens OX=9606 GN=DPEP2 PE=1 SV=3	DPEP2	53.364	0	0	0	0	0	0
Biological Process	GO:0044281	2	small molecule metabolic process	1.54	9.23484e-05	O60282	Kinesin heavy chain isoform 5C OS=Homo sapiens OX=9606 GN=KIF5C PE=1 SV=1	KIF5C	109.49	0.8	9	1	1	1	2190000000
Biological Process	GO:0044281	2	small molecule metabolic process	1.54	9.23484e-05	Q07954	Prolow-density lipoprotein receptor-related protein 1 OS=Homo sapiens OX=9606 GN=LRP1 PE=1 SV=2	LRP1	504.6	0	0	0	0	0	0
Biological Process	GO:0044281	2	small molecule metabolic process	1.54	9.23484e-05	P29401	Transketolase OS=Homo sapiens OX=9606 GN=TKT PE=1 SV=3	TKT	67.877	0	0	0	0	0	0
Biological Process	GO:0023052	1	signaling	1.26	9.26684e-05	P02545	Prelamin-A/C OS=Homo sapiens OX=9606 GN=LMNA PE=1 SV=1	LMNA	74.139	0	0	0	0	0	0
Biological Process	GO:0023052	1	signaling	1.26	9.26684e-05	P02656	Apolipoprotein C-III OS=Homo sapiens OX=9606 GN=APOC3 PE=1 SV=1	APOC3	10.852	0	0	0	0	0	0
Biological Process	GO:0023052	1	signaling	1.26	9.26684e-05	P0C869	Cytosolic phospholipase A2 beta OS=Homo sapiens OX=9606 GN=PLA2G4B PE=1 SV=2	PLA2G4B	87.977	0	0	0	0	0	0
Biological Process	GO:0023052	1	signaling	1.26	9.26684e-05	P62987	Ubiquitin-60S ribosomal protein L40 OS=Homo sapiens OX=9606 GN=UBA52 PE=1 SV=2	UBA52	14.728	39.1	7	6	6	6	90657000
Biological Process	GO:0023052	1	signaling	1.26	9.26684e-05	P0DOY3	Immunoglobulin lambda constant 3 OS=Homo sapiens OX=9606 GN=IGLC3 PE=1 SV=1	IGLC3	11.265	37.7	8	3	1	3	530400000
Biological Process	GO:0023052	1	signaling	1.26	9.26684e-05	P10599	Thioredoxin OS=Homo sapiens OX=9606 GN=TXN PE=1 SV=3	TXN	11.737	0	0	0	0	0	0
Biological Process	GO:0023052	1	signaling	1.26	9.26684e-05	P10809	60 kDa heat shock protein, mitochondrial OS=Homo sapiens OX=9606 GN=HSPD1 PE=1 SV=2	HSPD1	61.054	0	0	0	0	0	0
Biological Process	GO:0023052	1	signaling	1.26	9.26684e-05	P11021	Endoplasmic reticulum chaperone BiP OS=Homo sapiens OX=9606 GN=HSPA5 PE=1 SV=2	HSPA5	72.332	0	0	0	0	0	0
Biological Process	GO:0023052	1	signaling	1.26	9.26684e-05	P11142	Heat shock cognate 71 kDa protein OS=Homo sapiens OX=9606 GN=HSPA8 PE=1 SV=1	HSPA8	70.897	0	0	0	0	0	0
Biological Process	GO:0023052	1	signaling	1.26	9.26684e-05	P12830	Cadherin-1 OS=Homo sapiens OX=9606 GN=CDH1 PE=1 SV=3	CDH1	97.455	1.8	2	2	2	2	7974000
Biological Process	GO:0023052	1	signaling	1.26	9.26684e-05	P14174	Macrophage migration inhibitory factor OS=Homo sapiens OX=9606 GN=MIF PE=1 SV=4	MIF	12.476	0	0	0	0	0	0
Biological Process	GO:0023052	1	signaling	1.26	9.26684e-05	P14635	G2/mitotic-specific cyclin-B1 OS=Homo sapiens OX=9606 GN=CCNB1 PE=1 SV=1	CCNB1	48.337	0	0	0	0	0	0
Biological Process	GO:0023052	1	signaling	1.26	9.26684e-05	P14735	Insulin-degrading enzyme OS=Homo sapiens OX=9606 GN=IDE PE=1 SV=4	IDE	117.97	0	0	0	0	0	0
Biological Process	GO:0023052	1	signaling	1.26	9.26684e-05	P14923	Junction plakoglobin OS=Homo sapiens OX=9606 GN=JUP PE=1 SV=3	JUP	81.744	7.2	3	3	3	3	11408000
Biological Process	GO:0023052	1	signaling	1.26	9.26684e-05	P15144	Aminopeptidase N OS=Homo sapiens OX=9606 GN=ANPEP PE=1 SV=4	ANPEP	109.54	2.8	2	2	2	2	31204000
Biological Process	GO:0023052	1	signaling	1.26	9.26684e-05	P15151	Poliovirus receptor OS=Homo sapiens OX=9606 GN=PVR PE=1 SV=2	PVR	45.302	10.6	2	3	3	3	34951000
Biological Process	GO:0023052	1	signaling	1.26	9.26684e-05	P15259	Phosphoglycerate mutase 2 OS=Homo sapiens OX=9606 GN=PGAM2 PE=1 SV=3	PGAM2	28.766	0	0	0	0	0	0
Biological Process	GO:0023052	1	signaling	1.26	9.26684e-05	P15924	Desmoplakin OS=Homo sapiens OX=9606 GN=DSP PE=1 SV=3	DSP	331.77	4.1	10	8	8	8	36295000
Biological Process	GO:0023052	1	signaling	1.26	9.26684e-05	P16070	CD44 antigen OS=Homo sapiens OX=9606 GN=CD44 PE=1 SV=3	CD44	81.537	3	2	2	2	2	118550000
Biological Process	GO:0023052	1	signaling	1.26	9.26684e-05	P16885	1-phosphatidylinositol 4,5-bisphosphate phosphodiesterase gamma-2 OS=Homo sapiens OX=9606 GN=PLCG2 PE=1 SV=4	PLCG2	147.87	0	0	0	0	0	0
Biological Process	GO:0023052	1	signaling	1.26	9.26684e-05	P17174	Aspartate aminotransferase, cytoplasmic OS=Homo sapiens OX=9606 GN=GOT1 PE=1 SV=3	GOT1	46.247	3.6	1	1	1	1	3070800
Biological Process	GO:0023052	1	signaling	1.26	9.26684e-05	P17813	Endoglin OS=Homo sapiens OX=9606 GN=ENG PE=1 SV=2	ENG	70.577	0	0	0	0	0	0
Biological Process	GO:0023052	1	signaling	1.26	9.26684e-05	P17931	Galectin-3 OS=Homo sapiens OX=9606 GN=LGALS3 PE=1 SV=5	LGALS3	26.152	0	0	0	0	0	0
Biological Process	GO:0023052	1	signaling	1.26	9.26684e-05	P18510	Interleukin-1 receptor antagonist protein OS=Homo sapiens OX=9606 GN=IL1RN PE=1 SV=1	IL1RN	20.055	0	0	0	0	0	0
Biological Process	GO:0023052	1	signaling	1.26	9.26684e-05	P19012	Keratin, type I cytoskeletal 15 OS=Homo sapiens OX=9606 GN=KRT15 PE=1 SV=3	KRT15	49.211	0	0	0	0	0	0
Biological Process	GO:0023052	1	signaling	1.26	9.26684e-05	P0C0L5	Complement C4-B OS=Homo sapiens OX=9606 GN=C4B_2 PE=1 SV=2	C4B_2	192.75	2.9	4	3	3	3	50961000
Biological Process	GO:0023052	1	signaling	1.26	9.26684e-05	P02647	Apolipoprotein A-I OS=Homo sapiens OX=9606 GN=APOA1 PE=1 SV=1	APOA1	30.777	20.6	5	5	5	5	76295000
Biological Process	GO:0023052	1	signaling	1.26	9.26684e-05	P09619	Platelet-derived growth factor receptor beta OS=Homo sapiens OX=9606 GN=PDGFRB PE=1 SV=1	PDGFRB	123.97	2.9	3	2	2	2	4182400
Biological Process	GO:0023052	1	signaling	1.26	9.26684e-05	P09525	Annexin A4 OS=Homo sapiens OX=9606 GN=ANXA4 PE=1 SV=4	ANXA4	35.882	0	0	0	0	0	0
Biological Process	GO:0023052	1	signaling	1.26	9.26684e-05	P02787	Serotransferrin OS=Homo sapiens OX=9606 GN=TF PE=1 SV=4	TF	77.049	60.5	160	43	43	43	50131000000
Biological Process	GO:0023052	1	signaling	1.26	9.26684e-05	P04040	Catalase OS=Homo sapiens OX=9606 GN=CAT PE=1 SV=3	CAT	59.755	8.7	2	2	2	2	7648000
Biological Process	GO:0023052	1	signaling	1.26	9.26684e-05	P04083	Annexin A1 OS=Homo sapiens OX=9606 GN=ANXA1 PE=1 SV=2	ANXA1	38.714	0	0	0	0	0	0
Biological Process	GO:0023052	1	signaling	1.26	9.26684e-05	P04259	Keratin, type II cytoskeletal 6B OS=Homo sapiens OX=9606 GN=KRT6B PE=1 SV=5	KRT6B	60.066	36.3	3	23	2	2	10185000
Biological Process	GO:0023052	1	signaling	1.26	9.26684e-05	P04264	Keratin, type II cytoskeletal 1 OS=Homo sapiens OX=9606 GN=KRT1 PE=1 SV=6	KRT1	66.038	73.1	166	58	52	58	20880000000
Biological Process	GO:0023052	1	signaling	1.26	9.26684e-05	P04792	Heat shock protein beta-1 OS=Homo sapiens OX=9606 GN=HSPB1 PE=1 SV=2	HSPB1	22.782	7.8	1	1	1	1	1730200
Biological Process	GO:0023052	1	signaling	1.26	9.26684e-05	P05109	Protein S100-A8 OS=Homo sapiens OX=9606 GN=S100A8 PE=1 SV=1	S100A8	10.834	0	0	0	0	0	0
Biological Process	GO:0023052	1	signaling	1.26	9.26684e-05	P05120	Plasminogen activator inhibitor 2 OS=Homo sapiens OX=9606 GN=SERPINB2 PE=1 SV=2	SERPINB2	46.596	0	0	0	0	0	0
Biological Process	GO:0023052	1	signaling	1.26	9.26684e-05	P05362	Intercellular adhesion molecule 1 OS=Homo sapiens OX=9606 GN=ICAM1 PE=1 SV=2	ICAM1	57.825	0	0	0	0	0	0
Biological Process	GO:0023052	1	signaling	1.26	9.26684e-05	P05556	Integrin beta-1 OS=Homo sapiens OX=9606 GN=ITGB1 PE=1 SV=2	ITGB1	88.414	0	0	0	0	0	0
Biological Process	GO:0023052	1	signaling	1.26	9.26684e-05	P06276	Cholinesterase OS=Homo sapiens OX=9606 GN=BCHE PE=1 SV=1	BCHE	68.417	5.1	2	2	2	2	90413000
Biological Process	GO:0023052	1	signaling	1.26	9.26684e-05	P06396	Gelsolin OS=Homo sapiens OX=9606 GN=GSN PE=1 SV=1	GSN	85.696	0	0	0	0	0	0
Biological Process	GO:0023052	1	signaling	1.26	9.26684e-05	P06702	Protein S100-A9 OS=Homo sapiens OX=9606 GN=S100A9 PE=1 SV=1	S100A9	13.242	43	4	3	3	3	31021000
Biological Process	GO:0023052	1	signaling	1.26	9.26684e-05	P06733	Alpha-enolase OS=Homo sapiens OX=9606 GN=ENO1 PE=1 SV=2	ENO1	47.168	4.4	1	1	1	1	3345600
Biological Process	GO:0023052	1	signaling	1.26	9.26684e-05	P07333	Macrophage colony-stimulating factor 1 receptor OS=Homo sapiens OX=9606 GN=CSF1R PE=1 SV=2	CSF1R	107.98	2.2	2	2	2	2	24589000
Biological Process	GO:0023052	1	signaling	1.26	9.26684e-05	P07355	Annexin A2 OS=Homo sapiens OX=9606 GN=ANXA2 PE=1 SV=2	ANXA2	38.604	15.3	4	4	4	4	8350100
Biological Process	GO:0023052	1	signaling	1.26	9.26684e-05	P07359	Platelet glycoprotein Ib alpha chain OS=Homo sapiens OX=9606 GN=GP1BA PE=1 SV=2	GP1BA	71.539	0	0	0	0	0	0
Biological Process	GO:0023052	1	signaling	1.26	9.26684e-05	P07384	Calpain-1 catalytic subunit OS=Homo sapiens OX=9606 GN=CAPN1 PE=1 SV=1	CAPN1	81.889	0	0	0	0	0	0
Biological Process	GO:0023052	1	signaling	1.26	9.26684e-05	P08238	Heat shock protein HSP 90-beta OS=Homo sapiens OX=9606 GN=HSP90AB1 PE=1 SV=4	HSP90AB1	83.263	0	0	0	0	0	0
Biological Process	GO:0023052	1	signaling	1.26	9.26684e-05	P08571	Monocyte differentiation antigen CD14 OS=Homo sapiens OX=9606 GN=CD14 PE=1 SV=2	CD14	40.076	6.9	4	2	2	2	41719000
Biological Process	GO:0023052	1	signaling	1.26	9.26684e-05	P08670	Vimentin OS=Homo sapiens OX=9606 GN=VIM PE=1 SV=4	VIM	53.651	0	0	0	0	0	0
Biological Process	GO:0023052	1	signaling	1.26	9.26684e-05	P08727	Keratin, type I cytoskeletal 19 OS=Homo sapiens OX=9606 GN=KRT19 PE=1 SV=4	KRT19	44.105	0	0	0	0	0	0
Biological Process	GO:0023052	1	signaling	1.26	9.26684e-05	P08779	Keratin, type I cytoskeletal 16 OS=Homo sapiens OX=9606 GN=KRT16 PE=1 SV=4	KRT16	51.267	33	9	16	7	7	65846000
Biological Process	GO:0023052	1	signaling	1.26	9.26684e-05	P09601	Heme oxygenase 1 OS=Homo sapiens OX=9606 GN=HMOX1 PE=1 SV=1	HMOX1	32.818	0	0	0	0	0	0
Biological Process	GO:0023052	1	signaling	1.26	9.26684e-05	P19784	Casein kinase II subunit alpha' OS=Homo sapiens OX=9606 GN=CSNK2A2 PE=1 SV=1	CSNK2A2	41.213	0	0	0	0	0	0
Biological Process	GO:0044281	2	small molecule metabolic process	1.54	9.23484e-05	P26640	Valine--tRNA ligase OS=Homo sapiens OX=9606 GN=VARS1 PE=1 SV=4	VARS1	140.47	0	0	0	0	0	0
Biological Process	GO:0044281	2	small molecule metabolic process	1.54	9.23484e-05	P23526	Adenosylhomocysteinase OS=Homo sapiens OX=9606 GN=AHCY PE=1 SV=4	AHCY	47.716	0	0	0	0	0	0
Biological Process	GO:0009266	3	response to temperature stimulus	2.36	8.79929e-05	P20020	Plasma membrane calcium-transporting ATPase 1 OS=Homo sapiens OX=9606 GN=ATP2B1 PE=1 SV=4	ATP2B1	134.68	0	0	0	0	0	0
Biological Process	GO:0009266	3	response to temperature stimulus	2.36	8.79929e-05	P30086	Phosphatidylethanolamine-binding protein 1 OS=Homo sapiens OX=9606 GN=PEBP1 PE=1 SV=3	PEBP1	21.057	0	0	0	0	0	0
Biological Process	GO:0009266	3	response to temperature stimulus	2.36	8.79929e-05	P32119	Peroxiredoxin-2 OS=Homo sapiens OX=9606 GN=PRDX2 PE=1 SV=5	PRDX2	21.892	0	0	0	0	0	0
Biological Process	GO:0009266	3	response to temperature stimulus	2.36	8.79929e-05	P43251	Biotinidase OS=Homo sapiens OX=9606 GN=BTD PE=1 SV=2	BTD	61.132	9.2	6	5	5	5	57996000
Biological Process	GO:0009266	3	response to temperature stimulus	2.36	8.79929e-05	P62258	14-3-3 protein epsilon OS=Homo sapiens OX=9606 GN=YWHAE PE=1 SV=1	YWHAE	29.174	0	0	0	0	0	0
Biological Process	GO:0009266	3	response to temperature stimulus	2.36	8.79929e-05	Q06830	Peroxiredoxin-1 OS=Homo sapiens OX=9606 GN=PRDX1 PE=1 SV=1	PRDX1	22.11	9	1	1	1	1	1860400
Biological Process	GO:0009266	3	response to temperature stimulus	2.36	8.79929e-05	Q6UXB8	Peptidase inhibitor 16 OS=Homo sapiens OX=9606 GN=PI16 PE=1 SV=1	PI16	49.471	16.8	3	5	5	5	65058000
Biological Process	GO:0009266	3	response to temperature stimulus	2.36	8.79929e-05	Q96EP0	E3 ubiquitin-protein ligase RNF31 OS=Homo sapiens OX=9606 GN=RNF31 PE=1 SV=1	RNF31	119.65	0	0	0	0	0	0
Biological Process	GO:0009266	3	response to temperature stimulus	2.36	8.79929e-05	Q96IY4	Carboxypeptidase B2 OS=Homo sapiens OX=9606 GN=CPB2 PE=1 SV=2	CPB2	48.424	16.3	2	3	3	3	43281000
Biological Process	GO:0009266	3	response to temperature stimulus	2.36	8.79929e-05	O75340	Programmed cell death protein 6 OS=Homo sapiens OX=9606 GN=PDCD6 PE=1 SV=1	PDCD6	21.868	0	0	0	0	0	0
Biological Process	GO:0009266	3	response to temperature stimulus	2.36	8.79929e-05	O94759	Transient receptor potential cation channel subfamily M member 2 OS=Homo sapiens OX=9606 GN=TRPM2 PE=1 SV=2	TRPM2	171.2	0	0	0	0	0	0
Biological Process	GO:0009142	6	nucleoside triphosphate biosynthetic process	4.03	9.07848e-05	P00338	L-lactate dehydrogenase A chain OS=Homo sapiens OX=9606 GN=LDHA PE=1 SV=2	LDHA	36.688	0	0	0	0	0	0
Biological Process	GO:0009142	6	nucleoside triphosphate biosynthetic process	4.03	9.07848e-05	P00558	Phosphoglycerate kinase 1 OS=Homo sapiens OX=9606 GN=PGK1 PE=1 SV=3	PGK1	44.614	0	0	0	0	0	0
Biological Process	GO:0009142	6	nucleoside triphosphate biosynthetic process	4.03	9.07848e-05	P04075	Fructose-bisphosphate aldolase A OS=Homo sapiens OX=9606 GN=ALDOA PE=1 SV=2	ALDOA	39.42	4.9	1	1	1	1	12992000
Biological Process	GO:0009142	6	nucleoside triphosphate biosynthetic process	4.03	9.07848e-05	P04406	Glyceraldehyde-3-phosphate dehydrogenase OS=Homo sapiens OX=9606 GN=GAPDH PE=1 SV=3	GAPDH	36.053	28.7	5	6	6	6	28325000
Biological Process	GO:0009142	6	nucleoside triphosphate biosynthetic process	4.03	9.07848e-05	P06576	ATP synthase subunit beta, mitochondrial OS=Homo sapiens OX=9606 GN=ATP5F1B PE=1 SV=3	ATP5F1B	56.559	0	0	0	0	0	0
Biological Process	GO:0009142	6	nucleoside triphosphate biosynthetic process	4.03	9.07848e-05	P06733	Alpha-enolase OS=Homo sapiens OX=9606 GN=ENO1 PE=1 SV=2	ENO1	47.168	4.4	1	1	1	1	3345600
Biological Process	GO:0009142	6	nucleoside triphosphate biosynthetic process	4.03	9.07848e-05	P14618	Pyruvate kinase PKM OS=Homo sapiens OX=9606 GN=PKM PE=1 SV=4	PKM	57.936	0	0	0	0	0	0
Biological Process	GO:0009142	6	nucleoside triphosphate biosynthetic process	4.03	9.07848e-05	P15259	Phosphoglycerate mutase 2 OS=Homo sapiens OX=9606 GN=PGAM2 PE=1 SV=3	PGAM2	28.766	0	0	0	0	0	0
Biological Process	GO:0009142	6	nucleoside triphosphate biosynthetic process	4.03	9.07848e-05	P25705	ATP synthase subunit alpha, mitochondrial OS=Homo sapiens OX=9606 GN=ATP5F1A PE=1 SV=1	ATP5F1A	59.75	0	0	0	0	0	0
Biological Process	GO:0009142	6	nucleoside triphosphate biosynthetic process	4.03	9.07848e-05	P60174	Triosephosphate isomerase OS=Homo sapiens OX=9606 GN=TPI1 PE=1 SV=4	TPI1	26.669	0	0	0	0	0	0
Biological Process	GO:0009142	6	nucleoside triphosphate biosynthetic process	4.03	9.07848e-05	P07738	Bisphosphoglycerate mutase OS=Homo sapiens OX=9606 GN=BPGM PE=1 SV=2	BPGM	30.005	0	0	0	0	0	0
Biological Process	GO:0050764	5	regulation of phagocytosis	3.51	9.08829e-05	P01024	Complement C3 OS=Homo sapiens OX=9606 GN=C3 PE=1 SV=2	C3	187.15	0	0	0	0	0	0
Biological Process	GO:0009266	3	response to temperature stimulus	2.36	8.79929e-05	P14174	Macrophage migration inhibitory factor OS=Homo sapiens OX=9606 GN=MIF PE=1 SV=4	MIF	12.476	0	0	0	0	0	0
Biological Process	GO:0050764	5	regulation of phagocytosis	3.51	9.08829e-05	P02765	Alpha-2-HS-glycoprotein OS=Homo sapiens OX=9606 GN=AHSG PE=1 SV=2	AHSG	39.34	23.2	41	7	7	7	4512000000
Biological Process	GO:0009266	3	response to temperature stimulus	2.36	8.79929e-05	P11142	Heat shock cognate 71 kDa protein OS=Homo sapiens OX=9606 GN=HSPA8 PE=1 SV=1	HSPA8	70.897	0	0	0	0	0	0
Biological Process	GO:0009266	3	response to temperature stimulus	2.36	8.79929e-05	P0DMV9	Heat shock 70 kDa protein 1B OS=Homo sapiens OX=9606 GN=HSPA1B PE=1 SV=1	HSPA1B	70.051	0	0	0	0	0	0
Biological Process	GO:0042177	6	negative regulation of protein catabolic process	3.18	8.07738e-05	P08238	Heat shock protein HSP 90-beta OS=Homo sapiens OX=9606 GN=HSP90AB1 PE=1 SV=4	HSP90AB1	83.263	0	0	0	0	0	0
Biological Process	GO:0042177	6	negative regulation of protein catabolic process	3.18	8.07738e-05	P19784	Casein kinase II subunit alpha' OS=Homo sapiens OX=9606 GN=CSNK2A2 PE=1 SV=1	CSNK2A2	41.213	0	0	0	0	0	0
Biological Process	GO:0042177	6	negative regulation of protein catabolic process	3.18	8.07738e-05	P21333	Filamin-A OS=Homo sapiens OX=9606 GN=FLNA PE=1 SV=4	FLNA	280.74	0	0	0	0	0	0
Biological Process	GO:0042177	6	negative regulation of protein catabolic process	3.18	8.07738e-05	P29508	Serpin B3 OS=Homo sapiens OX=9606 GN=SERPINB3 PE=1 SV=2	SERPINB3	44.564	0	0	0	0	0	0
Biological Process	GO:0042177	6	negative regulation of protein catabolic process	3.18	8.07738e-05	P30740	Leukocyte elastase inhibitor OS=Homo sapiens OX=9606 GN=SERPINB1 PE=1 SV=1	SERPINB1	42.741	0	0	0	0	0	0
Biological Process	GO:0042177	6	negative regulation of protein catabolic process	3.18	8.07738e-05	P35232	Prohibitin 1 OS=Homo sapiens OX=9606 GN=PHB1 PE=1 SV=1	PHB1	29.804	0	0	0	0	0	0
Biological Process	GO:0042177	6	negative regulation of protein catabolic process	3.18	8.07738e-05	P62081	40S ribosomal protein S7 OS=Homo sapiens OX=9606 GN=RPS7 PE=1 SV=1	RPS7	22.127	0	0	0	0	0	0
Biological Process	GO:0042177	6	negative regulation of protein catabolic process	3.18	8.07738e-05	Q96P63	Serpin B12 OS=Homo sapiens OX=9606 GN=SERPINB12 PE=1 SV=1	SERPINB12	46.276	3	1	1	1	1	3836800
Biological Process	GO:0042177	6	negative regulation of protein catabolic process	3.18	8.07738e-05	Q9UIV8	Serpin B13 OS=Homo sapiens OX=9606 GN=SERPINB13 PE=1 SV=2	SERPINB13	44.276	0	0	0	0	0	0
Biological Process	GO:0042177	6	negative regulation of protein catabolic process	3.18	8.07738e-05	P01033	Metalloproteinase inhibitor 1 OS=Homo sapiens OX=9606 GN=TIMP1 PE=1 SV=1	TIMP1	23.171	12.1	1	2	2	2	17139000
Biological Process	GO:0042177	6	negative regulation of protein catabolic process	3.18	8.07738e-05	P01034	Cystatin-C OS=Homo sapiens OX=9606 GN=CST3 PE=1 SV=1	CST3	15.799	23.3	3	3	3	3	14030000
Biological Process	GO:0042177	6	negative regulation of protein catabolic process	3.18	8.07738e-05	Q8TEC5	E3 ubiquitin-protein ligase SH3RF2 OS=Homo sapiens OX=9606 GN=SH3RF2 PE=1 SV=3	SH3RF2	79.319	0	0	0	0	0	0
Biological Process	GO:0042177	6	negative regulation of protein catabolic process	3.18	8.07738e-05	Q96KB5	Lymphokine-activated killer T-cell-originated protein kinase OS=Homo sapiens OX=9606 GN=PBK PE=1 SV=3	PBK	36.085	0	0	0	0	0	0
Biological Process	GO:0009266	3	response to temperature stimulus	2.36	8.79929e-05	P00441	Superoxide dismutase [Cu-Zn] OS=Homo sapiens OX=9606 GN=SOD1 PE=1 SV=2	SOD1	15.936	0	0	0	0	0	0
Biological Process	GO:0009266	3	response to temperature stimulus	2.36	8.79929e-05	P00738	Haptoglobin OS=Homo sapiens OX=9606 GN=HP PE=1 SV=1	HP	45.205	53.7	182	24	13	24	96502000000
Biological Process	GO:0009266	3	response to temperature stimulus	2.36	8.79929e-05	P00739	Haptoglobin-related protein OS=Homo sapiens OX=9606 GN=HPR PE=2 SV=2	HPR	39.029	34.2	5	14	3	3	169590000
Biological Process	GO:0009266	3	response to temperature stimulus	2.36	8.79929e-05	P01019	Angiotensinogen OS=Homo sapiens OX=9606 GN=AGT PE=1 SV=3	AGT	53.154	7.6	3	3	3	3	91548000
Biological Process	GO:0009266	3	response to temperature stimulus	2.36	8.79929e-05	P04075	Fructose-bisphosphate aldolase A OS=Homo sapiens OX=9606 GN=ALDOA PE=1 SV=2	ALDOA	39.42	4.9	1	1	1	1	12992000
Biological Process	GO:0009266	3	response to temperature stimulus	2.36	8.79929e-05	P04792	Heat shock protein beta-1 OS=Homo sapiens OX=9606 GN=HSPB1 PE=1 SV=2	HSPB1	22.782	7.8	1	1	1	1	1730200
Biological Process	GO:0009266	3	response to temperature stimulus	2.36	8.79929e-05	P06732	Creatine kinase M-type OS=Homo sapiens OX=9606 GN=CKM PE=1 SV=2	CKM	43.101	0	0	0	0	0	0
Biological Process	GO:0009266	3	response to temperature stimulus	2.36	8.79929e-05	P08238	Heat shock protein HSP 90-beta OS=Homo sapiens OX=9606 GN=HSP90AB1 PE=1 SV=4	HSP90AB1	83.263	0	0	0	0	0	0
Biological Process	GO:0009266	3	response to temperature stimulus	2.36	8.79929e-05	P08571	Monocyte differentiation antigen CD14 OS=Homo sapiens OX=9606 GN=CD14 PE=1 SV=2	CD14	40.076	6.9	4	2	2	2	41719000
Biological Process	GO:0009266	3	response to temperature stimulus	2.36	8.79929e-05	P09601	Heme oxygenase 1 OS=Homo sapiens OX=9606 GN=HMOX1 PE=1 SV=1	HMOX1	32.818	0	0	0	0	0	0
Biological Process	GO:0009266	3	response to temperature stimulus	2.36	8.79929e-05	P10809	60 kDa heat shock protein, mitochondrial OS=Homo sapiens OX=9606 GN=HSPD1 PE=1 SV=2	HSPD1	61.054	0	0	0	0	0	0
Biological Process	GO:0044281	2	small molecule metabolic process	1.54	9.23484e-05	P25705	ATP synthase subunit alpha, mitochondrial OS=Homo sapiens OX=9606 GN=ATP5F1A PE=1 SV=1	ATP5F1A	59.75	0	0	0	0	0	0
Biological Process	GO:0050764	5	regulation of phagocytosis	3.51	9.08829e-05	P0C0L5	Complement C4-B OS=Homo sapiens OX=9606 GN=C4B_2 PE=1 SV=2	C4B_2	192.75	2.9	4	3	3	3	50961000
Biological Process	GO:0050764	5	regulation of phagocytosis	3.51	9.08829e-05	P35579	Myosin-9 OS=Homo sapiens OX=9606 GN=MYH9 PE=1 SV=4	MYH9	226.53	1.8	2	2	2	2	2939500
Biological Process	GO:0044281	2	small molecule metabolic process	1.54	9.23484e-05	P05164	Myeloperoxidase OS=Homo sapiens OX=9606 GN=MPO PE=1 SV=1	MPO	83.868	2.7	1	1	1	1	1665100
Biological Process	GO:0044281	2	small molecule metabolic process	1.54	9.23484e-05	P06576	ATP synthase subunit beta, mitochondrial OS=Homo sapiens OX=9606 GN=ATP5F1B PE=1 SV=3	ATP5F1B	56.559	0	0	0	0	0	0
Biological Process	GO:0044281	2	small molecule metabolic process	1.54	9.23484e-05	P06732	Creatine kinase M-type OS=Homo sapiens OX=9606 GN=CKM PE=1 SV=2	CKM	43.101	0	0	0	0	0	0
Biological Process	GO:0044281	2	small molecule metabolic process	1.54	9.23484e-05	P06733	Alpha-enolase OS=Homo sapiens OX=9606 GN=ENO1 PE=1 SV=2	ENO1	47.168	4.4	1	1	1	1	3345600
Biological Process	GO:0044281	2	small molecule metabolic process	1.54	9.23484e-05	P07108	Acyl-CoA-binding protein OS=Homo sapiens OX=9606 GN=DBI PE=1 SV=2	DBI	10.044	0	0	0	0	0	0
Biological Process	GO:0044281	2	small molecule metabolic process	1.54	9.23484e-05	P09211	Glutathione S-transferase P OS=Homo sapiens OX=9606 GN=GSTP1 PE=1 SV=2	GSTP1	23.356	0	0	0	0	0	0
Biological Process	GO:0044281	2	small molecule metabolic process	1.54	9.23484e-05	P0C869	Cytosolic phospholipase A2 beta OS=Homo sapiens OX=9606 GN=PLA2G4B PE=1 SV=2	PLA2G4B	87.977	0	0	0	0	0	0
Biological Process	GO:0044281	2	small molecule metabolic process	1.54	9.23484e-05	P0DMV9	Heat shock 70 kDa protein 1B OS=Homo sapiens OX=9606 GN=HSPA1B PE=1 SV=1	HSPA1B	70.051	0	0	0	0	0	0
Biological Process	GO:0044281	2	small molecule metabolic process	1.54	9.23484e-05	P11142	Heat shock cognate 71 kDa protein OS=Homo sapiens OX=9606 GN=HSPA8 PE=1 SV=1	HSPA8	70.897	0	0	0	0	0	0
Biological Process	GO:0044281	2	small molecule metabolic process	1.54	9.23484e-05	P12532	Creatine kinase U-type, mitochondrial OS=Homo sapiens OX=9606 GN=CKMT1B PE=1 SV=1	CKMT1B	47.036	0	0	0	0	0	0
Biological Process	GO:0044281	2	small molecule metabolic process	1.54	9.23484e-05	P12955	Xaa-Pro dipeptidase OS=Homo sapiens OX=9606 GN=PEPD PE=1 SV=3	PEPD	54.548	22.7	7	7	7	7	84891000
Biological Process	GO:0044281	2	small molecule metabolic process	1.54	9.23484e-05	P14174	Macrophage migration inhibitory factor OS=Homo sapiens OX=9606 GN=MIF PE=1 SV=4	MIF	12.476	0	0	0	0	0	0
Biological Process	GO:0044281	2	small molecule metabolic process	1.54	9.23484e-05	P14618	Pyruvate kinase PKM OS=Homo sapiens OX=9606 GN=PKM PE=1 SV=4	PKM	57.936	0	0	0	0	0	0
Biological Process	GO:0044281	2	small molecule metabolic process	1.54	9.23484e-05	P15104	Glutamine synthetase OS=Homo sapiens OX=9606 GN=GLUL PE=1 SV=4	GLUL	42.064	0	0	0	0	0	0
Biological Process	GO:0044281	2	small molecule metabolic process	1.54	9.23484e-05	P15259	Phosphoglycerate mutase 2 OS=Homo sapiens OX=9606 GN=PGAM2 PE=1 SV=3	PGAM2	28.766	0	0	0	0	0	0
Biological Process	GO:0044281	2	small molecule metabolic process	1.54	9.23484e-05	P15291	Beta-1,4-galactosyltransferase 1 OS=Homo sapiens OX=9606 GN=B4GALT1 PE=1 SV=5	B4GALT1	43.92	0	0	0	0	0	0
Biological Process	GO:0044281	2	small molecule metabolic process	1.54	9.23484e-05	P15309	Prostatic acid phosphatase OS=Homo sapiens OX=9606 GN=ACP3 PE=1 SV=3	ACP3	44.566	0	0	0	0	0	0
Biological Process	GO:0044281	2	small molecule metabolic process	1.54	9.23484e-05	P16070	CD44 antigen OS=Homo sapiens OX=9606 GN=CD44 PE=1 SV=3	CD44	81.537	3	2	2	2	2	118550000
Biological Process	GO:0044281	2	small molecule metabolic process	1.54	9.23484e-05	P16885	1-phosphatidylinositol 4,5-bisphosphate phosphodiesterase gamma-2 OS=Homo sapiens OX=9606 GN=PLCG2 PE=1 SV=4	PLCG2	147.87	0	0	0	0	0	0
Biological Process	GO:0044281	2	small molecule metabolic process	1.54	9.23484e-05	P16930	Fumarylacetoacetase OS=Homo sapiens OX=9606 GN=FAH PE=1 SV=2	FAH	46.374	9.3	3	3	3	3	8327800
Biological Process	GO:0044281	2	small molecule metabolic process	1.54	9.23484e-05	P17174	Aspartate aminotransferase, cytoplasmic OS=Homo sapiens OX=9606 GN=GOT1 PE=1 SV=3	GOT1	46.247	3.6	1	1	1	1	3070800
Biological Process	GO:0044281	2	small molecule metabolic process	1.54	9.23484e-05	P18510	Interleukin-1 receptor antagonist protein OS=Homo sapiens OX=9606 GN=IL1RN PE=1 SV=1	IL1RN	20.055	0	0	0	0	0	0
Biological Process	GO:0044281	2	small molecule metabolic process	1.54	9.23484e-05	P19971	Thymidine phosphorylase OS=Homo sapiens OX=9606 GN=TYMP PE=1 SV=2	TYMP	49.955	0	0	0	0	0	0
Biological Process	GO:0044281	2	small molecule metabolic process	1.54	9.23484e-05	P05090	Apolipoprotein D OS=Homo sapiens OX=9606 GN=APOD PE=1 SV=1	APOD	21.275	25.9	14	4	4	4	463060000
Biological Process	GO:0050764	5	regulation of phagocytosis	3.51	9.08829e-05	P11142	Heat shock cognate 71 kDa protein OS=Homo sapiens OX=9606 GN=HSPA8 PE=1 SV=1	HSPA8	70.897	0	0	0	0	0	0
Biological Process	GO:0044281	2	small molecule metabolic process	1.54	9.23484e-05	P05089	Arginase-1 OS=Homo sapiens OX=9606 GN=ARG1 PE=1 SV=2	ARG1	34.735	8.4	5	3	3	3	32997000
Biological Process	GO:0044281	2	small molecule metabolic process	1.54	9.23484e-05	P04180	Phosphatidylcholine-sterol acyltransferase OS=Homo sapiens OX=9606 GN=LCAT PE=1 SV=1	LCAT	49.577	23.9	9	7	7	7	281860000
Biological Process	GO:0050764	5	regulation of phagocytosis	3.51	9.08829e-05	P63244	Receptor of activated protein C kinase 1 OS=Homo sapiens OX=9606 GN=RACK1 PE=1 SV=3	RACK1	35.076	0	0	0	0	0	0
Biological Process	GO:0050764	5	regulation of phagocytosis	3.51	9.08829e-05	Q15084	Protein disulfide-isomerase A6 OS=Homo sapiens OX=9606 GN=PDIA6 PE=1 SV=1	PDIA6	48.121	0	0	0	0	0	0
Biological Process	GO:0050764	5	regulation of phagocytosis	3.51	9.08829e-05	Q8IUG5	Unconventional myosin-XVIIIb OS=Homo sapiens OX=9606 GN=MYO18B PE=1 SV=2	MYO18B	285.21	0	0	0	0	0	0
Biological Process	GO:0050764	5	regulation of phagocytosis	3.51	9.08829e-05	P06681	Complement C2 OS=Homo sapiens OX=9606 GN=C2 PE=1 SV=2	C2	83.267	0	0	0	0	0	0
Biological Process	GO:0050764	5	regulation of phagocytosis	3.51	9.08829e-05	P00746	Complement factor D OS=Homo sapiens OX=9606 GN=CFD PE=1 SV=5	CFD	27.033	0	0	0	0	0	0
Biological Process	GO:0050764	5	regulation of phagocytosis	3.51	9.08829e-05	P0C0L4	Complement C4-A OS=Homo sapiens OX=9606 GN=C4A PE=1 SV=2	C4A	192.78	0	0	0	0	0	0
Biological Process	GO:0050764	5	regulation of phagocytosis	3.51	9.08829e-05	P00751	Complement factor B OS=Homo sapiens OX=9606 GN=CFB PE=1 SV=2	CFB	85.532	22.3	13	12	12	12	416220000
Biological Process	GO:0050764	5	regulation of phagocytosis	3.51	9.08829e-05	Q8N1I0	Dedicator of cytokinesis protein 4 OS=Homo sapiens OX=9606 GN=DOCK4 PE=1 SV=3	DOCK4	225.2	0.5	1	1	1	1	0
Biological Process	GO:0044281	2	small molecule metabolic process	1.54	9.23484e-05	O00204	Sulfotransferase 2B1 OS=Homo sapiens OX=9606 GN=SULT2B1 PE=1 SV=2	SULT2B1	41.307	0	0	0	0	0	0
Biological Process	GO:0044281	2	small molecule metabolic process	1.54	9.23484e-05	P00338	L-lactate dehydrogenase A chain OS=Homo sapiens OX=9606 GN=LDHA PE=1 SV=2	LDHA	36.688	0	0	0	0	0	0
Biological Process	GO:0044281	2	small molecule metabolic process	1.54	9.23484e-05	P00505	Aspartate aminotransferase, mitochondrial OS=Homo sapiens OX=9606 GN=GOT2 PE=1 SV=3	GOT2	47.517	0	0	0	0	0	0
Biological Process	GO:0044281	2	small molecule metabolic process	1.54	9.23484e-05	P00558	Phosphoglycerate kinase 1 OS=Homo sapiens OX=9606 GN=PGK1 PE=1 SV=3	PGK1	44.614	0	0	0	0	0	0
Biological Process	GO:0044281	2	small molecule metabolic process	1.54	9.23484e-05	P00918	Carbonic anhydrase 2 OS=Homo sapiens OX=9606 GN=CA2 PE=1 SV=2	CA2	29.246	0	0	0	0	0	0
Biological Process	GO:0044281	2	small molecule metabolic process	1.54	9.23484e-05	P02647	Apolipoprotein A-I OS=Homo sapiens OX=9606 GN=APOA1 PE=1 SV=1	APOA1	30.777	20.6	5	5	5	5	76295000
Biological Process	GO:0044281	2	small molecule metabolic process	1.54	9.23484e-05	P02652	Apolipoprotein A-II OS=Homo sapiens OX=9606 GN=APOA2 PE=1 SV=1	APOA2	11.175	19	7	3	3	3	7512000000
Biological Process	GO:0044281	2	small molecule metabolic process	1.54	9.23484e-05	P02654	Apolipoprotein C-I OS=Homo sapiens OX=9606 GN=APOC1 PE=1 SV=1	APOC1	9.3318	34.9	3	3	3	3	164400000
Biological Process	GO:0044281	2	small molecule metabolic process	1.54	9.23484e-05	P02656	Apolipoprotein C-III OS=Homo sapiens OX=9606 GN=APOC3 PE=1 SV=1	APOC3	10.852	0	0	0	0	0	0
Biological Process	GO:0044281	2	small molecule metabolic process	1.54	9.23484e-05	P02753	Retinol-binding protein 4 OS=Homo sapiens OX=9606 GN=RBP4 PE=1 SV=3	RBP4	23.01	47.3	7	7	7	7	728740000
Biological Process	GO:0044281	2	small molecule metabolic process	1.54	9.23484e-05	P02766	Transthyretin OS=Homo sapiens OX=9606 GN=TTR PE=1 SV=1	TTR	15.887	72.8	35	11	11	11	17121000000
Biological Process	GO:0044281	2	small molecule metabolic process	1.54	9.23484e-05	P02774	Vitamin D-binding protein OS=Homo sapiens OX=9606 GN=GC PE=1 SV=2	GC	52.917	29.3	14	11	11	11	792270000
Biological Process	GO:0044281	2	small molecule metabolic process	1.54	9.23484e-05	P03952	Plasma kallikrein OS=Homo sapiens OX=9606 GN=KLKB1 PE=1 SV=1	KLKB1	71.369	3.6	2	2	2	2	42984000
Biological Process	GO:0044281	2	small molecule metabolic process	1.54	9.23484e-05	P04040	Catalase OS=Homo sapiens OX=9606 GN=CAT PE=1 SV=3	CAT	59.755	8.7	2	2	2	2	7648000
Biological Process	GO:0044281	2	small molecule metabolic process	1.54	9.23484e-05	P04075	Fructose-bisphosphate aldolase A OS=Homo sapiens OX=9606 GN=ALDOA PE=1 SV=2	ALDOA	39.42	4.9	1	1	1	1	12992000
Biological Process	GO:0044281	2	small molecule metabolic process	1.54	9.23484e-05	P04406	Glyceraldehyde-3-phosphate dehydrogenase OS=Homo sapiens OX=9606 GN=GAPDH PE=1 SV=3	GAPDH	36.053	28.7	5	6	6	6	28325000
Biological Process	GO:0023052	1	signaling	1.26	9.26684e-05	P21281	V-type proton ATPase subunit B, brain isoform OS=Homo sapiens OX=9606 GN=ATP6V1B2 PE=1 SV=3	ATP6V1B2	56.5	0	0	0	0	0	0
Biological Process	GO:0023052	1	signaling	1.26	9.26684e-05	P21333	Filamin-A OS=Homo sapiens OX=9606 GN=FLNA PE=1 SV=4	FLNA	280.74	0	0	0	0	0	0
Biological Process	GO:0023052	1	signaling	1.26	9.26684e-05	P22735	Protein-glutamine gamma-glutamyltransferase K OS=Homo sapiens OX=9606 GN=TGM1 PE=1 SV=4	TGM1	89.786	3.3	2	2	2	2	11308000
Biological Process	GO:0032880	5	regulation of protein localization	1.65	0.000107008	P15104	Glutamine synthetase OS=Homo sapiens OX=9606 GN=GLUL PE=1 SV=4	GLUL	42.064	0	0	0	0	0	0
Biological Process	GO:0032880	5	regulation of protein localization	1.65	0.000107008	P19652	Alpha-1-acid glycoprotein 2 OS=Homo sapiens OX=9606 GN=ORM2 PE=1 SV=2	ORM2	23.602	34.8	25	8	6	8	4912700000
Biological Process	GO:0032880	5	regulation of protein localization	1.65	0.000107008	P27487	Dipeptidyl peptidase 4 OS=Homo sapiens OX=9606 GN=DPP4 PE=1 SV=2	DPP4	88.278	15	7	8	8	8	79452000
Biological Process	GO:0032880	5	regulation of protein localization	1.65	0.000107008	P29508	Serpin B3 OS=Homo sapiens OX=9606 GN=SERPINB3 PE=1 SV=2	SERPINB3	44.564	0	0	0	0	0	0
Biological Process	GO:0032880	5	regulation of protein localization	1.65	0.000107008	P30740	Leukocyte elastase inhibitor OS=Homo sapiens OX=9606 GN=SERPINB1 PE=1 SV=1	SERPINB1	42.741	0	0	0	0	0	0
Biological Process	GO:0032880	5	regulation of protein localization	1.65	0.000107008	P31947	14-3-3 protein sigma OS=Homo sapiens OX=9606 GN=SFN PE=1 SV=1	SFN	27.774	0	0	0	0	0	0
Biological Process	GO:0032880	5	regulation of protein localization	1.65	0.000107008	P35579	Myosin-9 OS=Homo sapiens OX=9606 GN=MYH9 PE=1 SV=4	MYH9	226.53	1.8	2	2	2	2	2939500
Biological Process	GO:0032880	5	regulation of protein localization	1.65	0.000107008	P49662	Caspase-4 OS=Homo sapiens OX=9606 GN=CASP4 PE=1 SV=1	CASP4	43.262	4	6	1	1	1	29842000
Biological Process	GO:0032880	5	regulation of protein localization	1.65	0.000107008	P51812	Ribosomal protein S6 kinase alpha-3 OS=Homo sapiens OX=9606 GN=RPS6KA3 PE=1 SV=1	RPS6KA3	83.735	1.2	1	1	1	1	0
Biological Process	GO:0032880	5	regulation of protein localization	1.65	0.000107008	P61981	14-3-3 protein gamma OS=Homo sapiens OX=9606 GN=YWHAG PE=1 SV=2	YWHAG	28.302	0	0	0	0	0	0
Biological Process	GO:0032880	5	regulation of protein localization	1.65	0.000107008	P62258	14-3-3 protein epsilon OS=Homo sapiens OX=9606 GN=YWHAE PE=1 SV=1	YWHAE	29.174	0	0	0	0	0	0
Biological Process	GO:0032880	5	regulation of protein localization	1.65	0.000107008	P62826	GTP-binding nuclear protein Ran OS=Homo sapiens OX=9606 GN=RAN PE=1 SV=3	RAN	24.423	0	0	0	0	0	0
Biological Process	GO:0032880	5	regulation of protein localization	1.65	0.000107008	P62937	Peptidyl-prolyl cis-trans isomerase A OS=Homo sapiens OX=9606 GN=PPIA PE=1 SV=2	PPIA	18.012	0	0	0	0	0	0
Biological Process	GO:0032880	5	regulation of protein localization	1.65	0.000107008	P63104	14-3-3 protein zeta/delta OS=Homo sapiens OX=9606 GN=YWHAZ PE=1 SV=1	YWHAZ	27.745	0	0	0	0	0	0
Biological Process	GO:0032880	5	regulation of protein localization	1.65	0.000107008	P63244	Receptor of activated protein C kinase 1 OS=Homo sapiens OX=9606 GN=RACK1 PE=1 SV=3	RACK1	35.076	0	0	0	0	0	0
Biological Process	GO:0032880	5	regulation of protein localization	1.65	0.000107008	P80108	Phosphatidylinositol-glycan-specific phospholipase D OS=Homo sapiens OX=9606 GN=GPLD1 PE=1 SV=3	GPLD1	92.335	7.7	5	5	5	5	109680000
Biological Process	GO:0032880	5	regulation of protein localization	1.65	0.000107008	Q15648	Mediator of RNA polymerase II transcription subunit 1 OS=Homo sapiens OX=9606 GN=MED1 PE=1 SV=4	MED1	168.48	0	0	0	0	0	0
Biological Process	GO:0032880	5	regulation of protein localization	1.65	0.000107008	Q8IUG5	Unconventional myosin-XVIIIb OS=Homo sapiens OX=9606 GN=MYO18B PE=1 SV=2	MYO18B	285.21	0	0	0	0	0	0
Biological Process	GO:0032880	5	regulation of protein localization	1.65	0.000107008	Q96K17	Transcription factor BTF3 homolog 4 OS=Homo sapiens OX=9606 GN=BTF3L4 PE=1 SV=1	BTF3L4	17.27	0	0	0	0	0	0
Biological Process	GO:0032880	5	regulation of protein localization	1.65	0.000107008	Q96P63	Serpin B12 OS=Homo sapiens OX=9606 GN=SERPINB12 PE=1 SV=1	SERPINB12	46.276	3	1	1	1	1	3836800
Biological Process	GO:0032880	5	regulation of protein localization	1.65	0.000107008	Q9BY67	Cell adhesion molecule 1 OS=Homo sapiens OX=9606 GN=CADM1 PE=1 SV=2	CADM1	48.509	0	0	0	0	0	0
Biological Process	GO:0032880	5	regulation of protein localization	1.65	0.000107008	Q9NPH3	Interleukin-1 receptor accessory protein OS=Homo sapiens OX=9606 GN=IL1RAP PE=1 SV=2	IL1RAP	65.418	5.3	2	2	2	2	10635000
Biological Process	GO:0032880	5	regulation of protein localization	1.65	0.000107008	Q9UIV8	Serpin B13 OS=Homo sapiens OX=9606 GN=SERPINB13 PE=1 SV=2	SERPINB13	44.276	0	0	0	0	0	0
Biological Process	GO:0032880	5	regulation of protein localization	1.65	0.000107008	P14923	Junction plakoglobin OS=Homo sapiens OX=9606 GN=JUP PE=1 SV=3	JUP	81.744	7.2	3	3	3	3	11408000
Biological Process	GO:0032880	5	regulation of protein localization	1.65	0.000107008	Q9Y261	Hepatocyte nuclear factor 3-beta OS=Homo sapiens OX=9606 GN=FOXA2 PE=1 SV=1	FOXA2	48.306	0	0	0	0	0	0
Biological Process	GO:0032880	5	regulation of protein localization	1.65	0.000107008	P14174	Macrophage migration inhibitory factor OS=Homo sapiens OX=9606 GN=MIF PE=1 SV=4	MIF	12.476	0	0	0	0	0	0
Biological Process	GO:0032880	5	regulation of protein localization	1.65	0.000107008	P11142	Heat shock cognate 71 kDa protein OS=Homo sapiens OX=9606 GN=HSPA8 PE=1 SV=1	HSPA8	70.897	0	0	0	0	0	0
Biological Process	GO:0032880	5	regulation of protein localization	1.65	0.000107008	O15195	Villin-like protein OS=Homo sapiens OX=9606 GN=VILL PE=1 SV=3	VILL	95.906	3.4	2	2	2	2	17286000
Biological Process	GO:0032880	5	regulation of protein localization	1.65	0.000107008	O75608	Acyl-protein thioesterase 1 OS=Homo sapiens OX=9606 GN=LYPLA1 PE=1 SV=1	LYPLA1	24.669	0	0	0	0	0	0
Biological Process	GO:0032880	5	regulation of protein localization	1.65	0.000107008	P00533	Epidermal growth factor receptor OS=Homo sapiens OX=9606 GN=EGFR PE=1 SV=2	EGFR	134.28	0	0	0	0	0	0
Biological Process	GO:0032880	5	regulation of protein localization	1.65	0.000107008	P01019	Angiotensinogen OS=Homo sapiens OX=9606 GN=AGT PE=1 SV=3	AGT	53.154	7.6	3	3	3	3	91548000
Biological Process	GO:0032880	5	regulation of protein localization	1.65	0.000107008	P01024	Complement C3 OS=Homo sapiens OX=9606 GN=C3 PE=1 SV=2	C3	187.15	0	0	0	0	0	0
Biological Process	GO:0032880	5	regulation of protein localization	1.65	0.000107008	P02545	Prelamin-A/C OS=Homo sapiens OX=9606 GN=LMNA PE=1 SV=1	LMNA	74.139	0	0	0	0	0	0
Biological Process	GO:0032880	5	regulation of protein localization	1.65	0.000107008	P02647	Apolipoprotein A-I OS=Homo sapiens OX=9606 GN=APOA1 PE=1 SV=1	APOA1	30.777	20.6	5	5	5	5	76295000
Biological Process	GO:0032880	5	regulation of protein localization	1.65	0.000107008	P02652	Apolipoprotein A-II OS=Homo sapiens OX=9606 GN=APOA2 PE=1 SV=1	APOA2	11.175	19	7	3	3	3	7512000000
Biological Process	GO:0032880	5	regulation of protein localization	1.65	0.000107008	P02753	Retinol-binding protein 4 OS=Homo sapiens OX=9606 GN=RBP4 PE=1 SV=3	RBP4	23.01	47.3	7	7	7	7	728740000
Biological Process	GO:0032880	5	regulation of protein localization	1.65	0.000107008	P02763	Alpha-1-acid glycoprotein 1 OS=Homo sapiens OX=9606 GN=ORM1 PE=1 SV=2	ORM1	23.539	41.8	11	8	6	6	3742300000
Biological Process	GO:0032880	5	regulation of protein localization	1.65	0.000107008	P04083	Annexin A1 OS=Homo sapiens OX=9606 GN=ANXA1 PE=1 SV=2	ANXA1	38.714	0	0	0	0	0	0
Biological Process	GO:0032880	5	regulation of protein localization	1.65	0.000107008	P04406	Glyceraldehyde-3-phosphate dehydrogenase OS=Homo sapiens OX=9606 GN=GAPDH PE=1 SV=3	GAPDH	36.053	28.7	5	6	6	6	28325000
Biological Process	GO:0032880	5	regulation of protein localization	1.65	0.000107008	P05090	Apolipoprotein D OS=Homo sapiens OX=9606 GN=APOD PE=1 SV=1	APOD	21.275	25.9	14	4	4	4	463060000
Biological Process	GO:0032880	5	regulation of protein localization	1.65	0.000107008	P05556	Integrin beta-1 OS=Homo sapiens OX=9606 GN=ITGB1 PE=1 SV=2	ITGB1	88.414	0	0	0	0	0	0
Biological Process	GO:0032880	5	regulation of protein localization	1.65	0.000107008	P06276	Cholinesterase OS=Homo sapiens OX=9606 GN=BCHE PE=1 SV=1	BCHE	68.417	5.1	2	2	2	2	90413000
Biological Process	GO:0032880	5	regulation of protein localization	1.65	0.000107008	P06396	Gelsolin OS=Homo sapiens OX=9606 GN=GSN PE=1 SV=1	GSN	85.696	0	0	0	0	0	0
Biological Process	GO:0032880	5	regulation of protein localization	1.65	0.000107008	P07333	Macrophage colony-stimulating factor 1 receptor OS=Homo sapiens OX=9606 GN=CSF1R PE=1 SV=2	CSF1R	107.98	2.2	2	2	2	2	24589000
Biological Process	GO:0032880	5	regulation of protein localization	1.65	0.000107008	P08238	Heat shock protein HSP 90-beta OS=Homo sapiens OX=9606 GN=HSP90AB1 PE=1 SV=4	HSP90AB1	83.263	0	0	0	0	0	0
Biological Process	GO:0032880	5	regulation of protein localization	1.65	0.000107008	P08571	Monocyte differentiation antigen CD14 OS=Homo sapiens OX=9606 GN=CD14 PE=1 SV=2	CD14	40.076	6.9	4	2	2	2	41719000
Biological Process	GO:0032880	5	regulation of protein localization	1.65	0.000107008	P09525	Annexin A4 OS=Homo sapiens OX=9606 GN=ANXA4 PE=1 SV=4	ANXA4	35.882	0	0	0	0	0	0
Biological Process	GO:0032880	5	regulation of protein localization	1.65	0.000107008	P0C0L5	Complement C4-B OS=Homo sapiens OX=9606 GN=C4B_2 PE=1 SV=2	C4B_2	192.75	2.9	4	3	3	3	50961000
[truncated: 53,519 more rows]
