# Supplementary material for: Protein composition analysis of human plasma-derived and recombinant human serum albumin preparations based on 4D label-free proteomics
Source: PeerJ journal article supplement (doi:10.7717/peerj.19624), 2025-06-30
Supplement: Supplementary.zip [file Supplementary.zip]

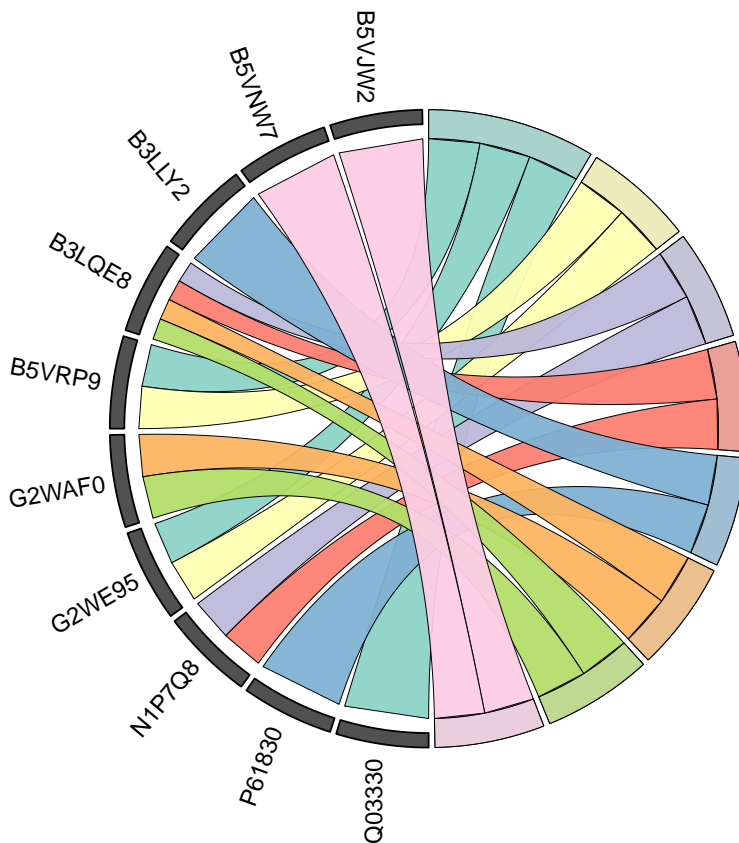

## MF Terms

|                                               |                                              |
|-----------------------------------------------|----------------------------------------------|
| GO:0003712 transcription coregulator activity | GO:0031490 chromatin DNA binding             |
| GO:0003714 transcription corepressor activity | GO:0042802 identical protein binding         |
| GO:0019900 kinase binding                     | GO:0042803 protein homodimerization activity |
| GO:0019901 protein kinase binding             | GO:0043139 5'-3' DNA helicase activity       |
