# Supplementary material for: Protein composition analysis of human plasma-derived and recombinant human serum albumin preparations based on 4D label-free proteomics
Source: PeerJ journal article supplement (doi:10.7717/peerj.19624), 2025-06-30
Supplement: Supplementary.zip [file Supplementary.zip]

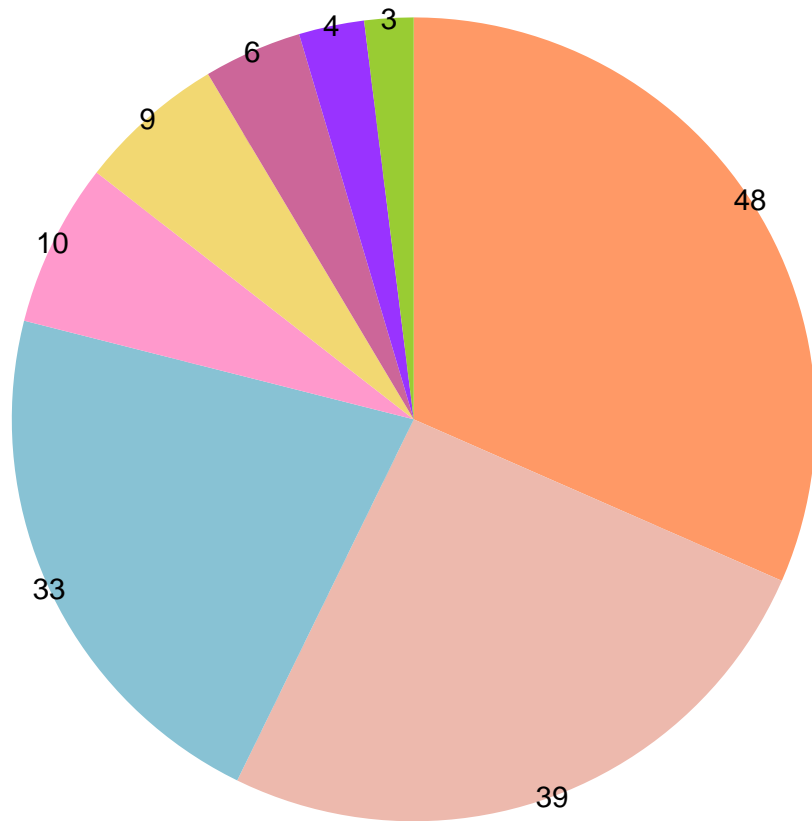

### Subcellular localization

- chloroplast 48(31.58%)
- nucleus 39(25.66%)
- cytoplasm 33(21.71%)
- mitochondria 10(6.58%)
- plasma membrane 9(5.92%)
- extracellular 6(3.95%)
- other 4(2.63%)
- cytoskeleton 3(1.97%)
