# Supplementary figures and images for: Protein composition analysis of human plasma-derived and recombinant human serum albumin preparations based on 4D label-free proteomics
Source: PeerJ journal article supplement (doi:10.7717/peerj.19624), 2025-06-30

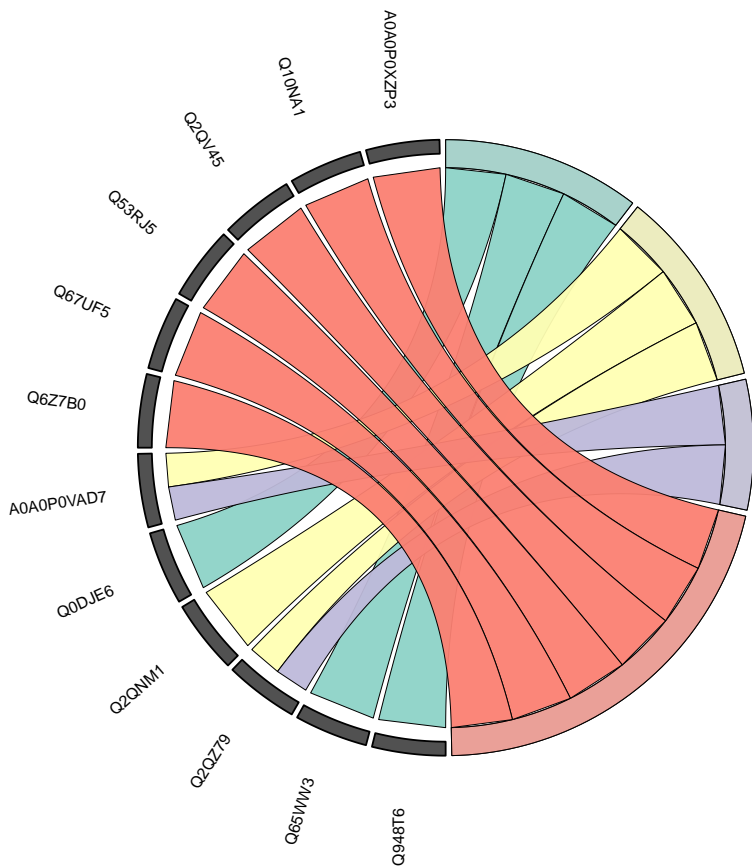

#### KEGG\_pathway

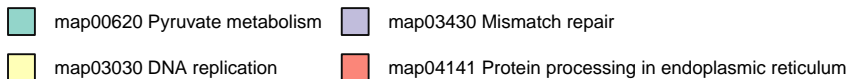

Supplement: Supplementary.zip [file Supplementary.zip]

Count

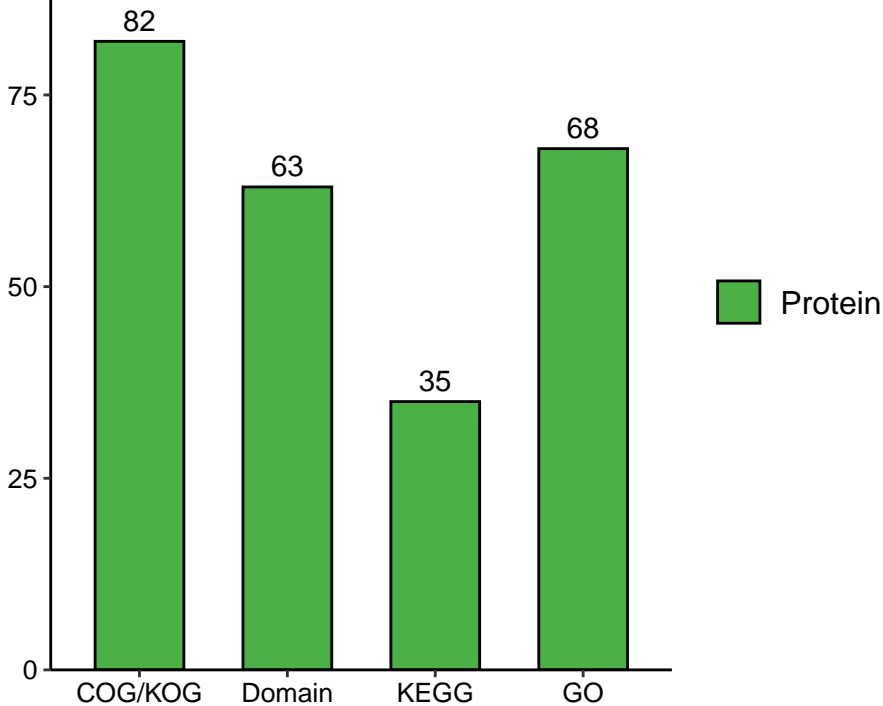

Supplement: Supplementary.zip [file Supplementary.zip]

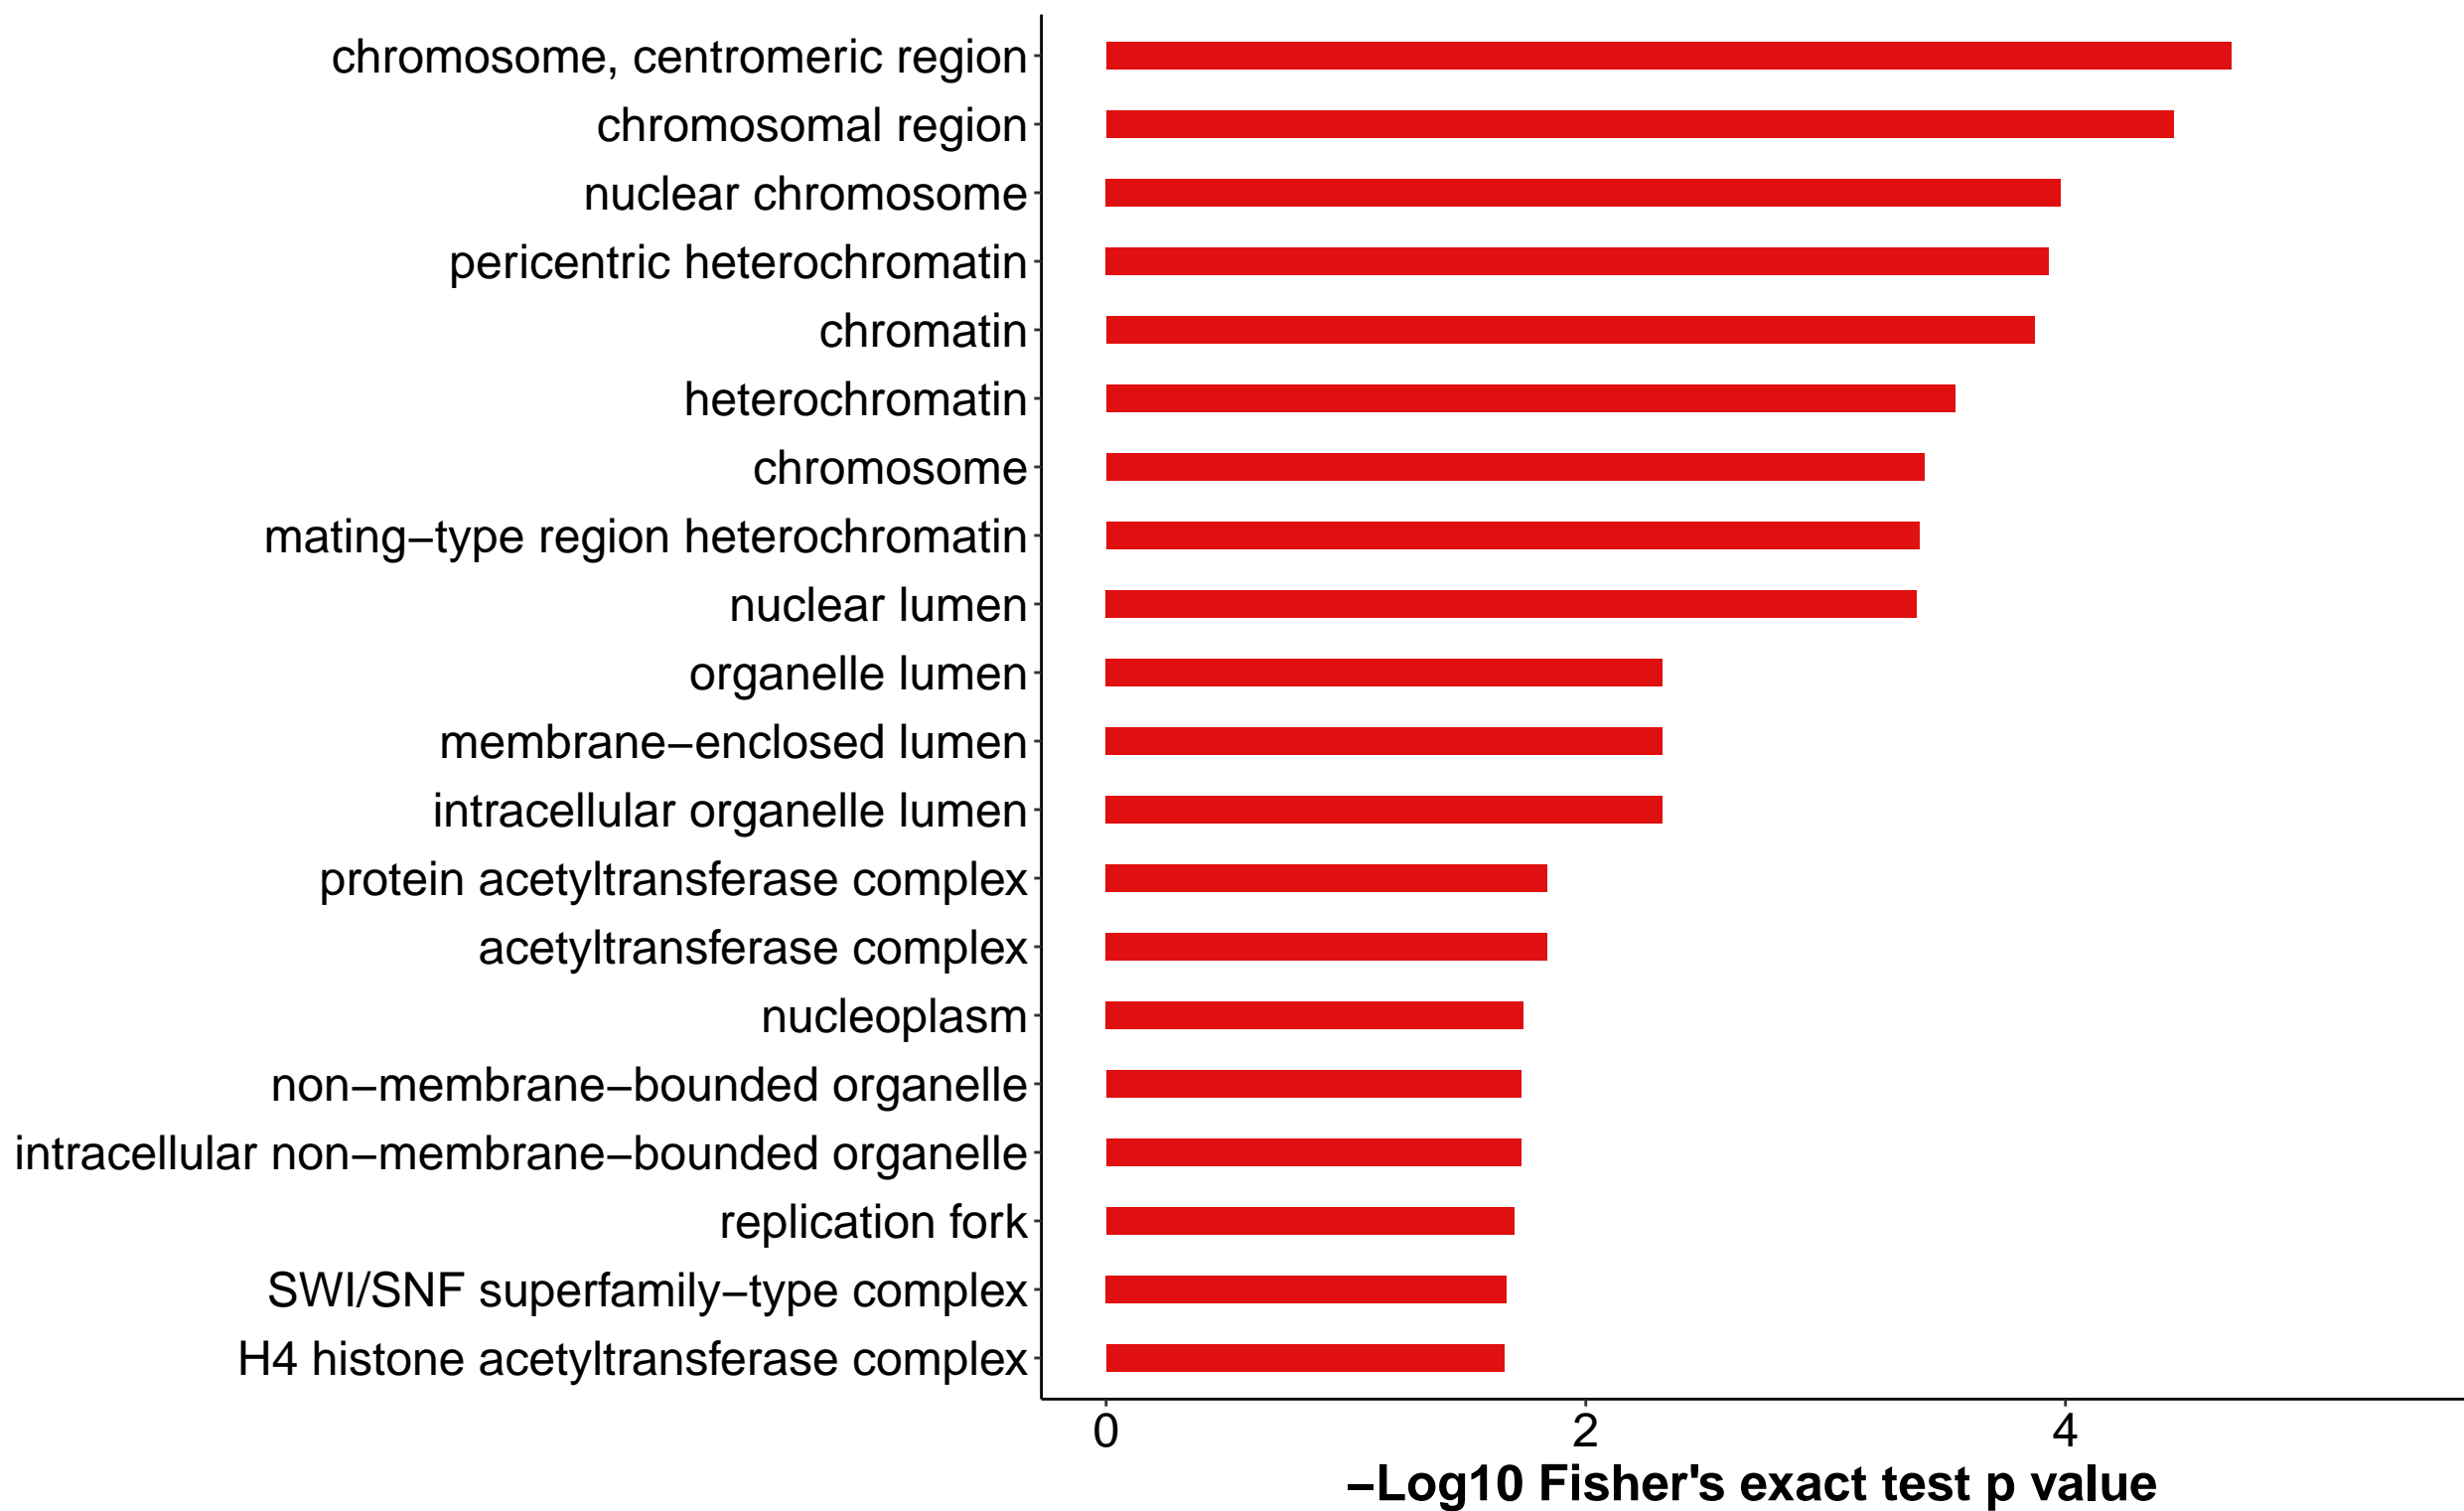

Supplement: Supplementary.zip [file Supplementary.zip]

Count

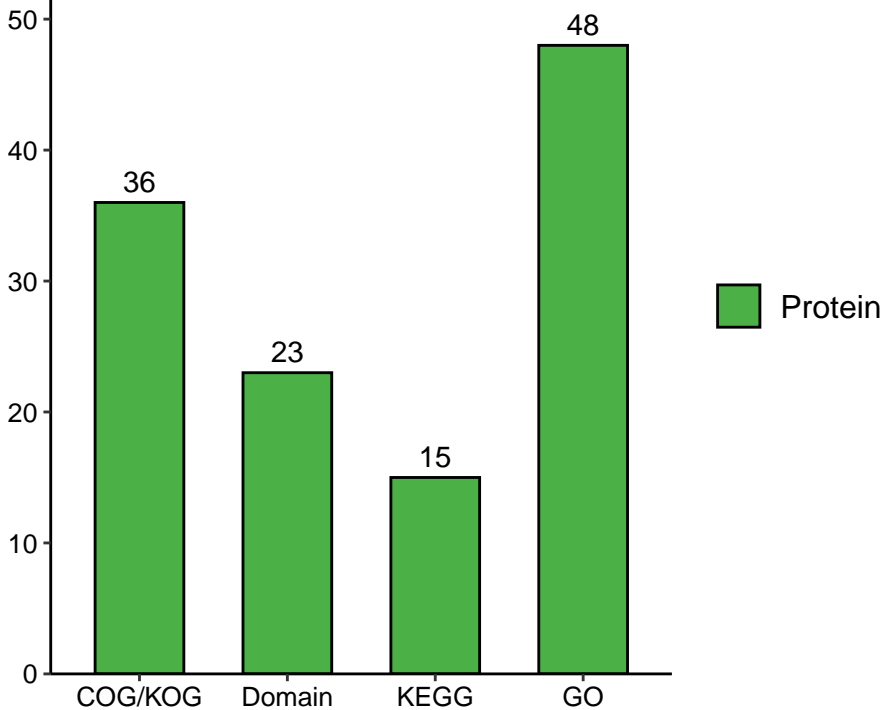

Supplement: Supplementary.zip [file Supplementary.zip]

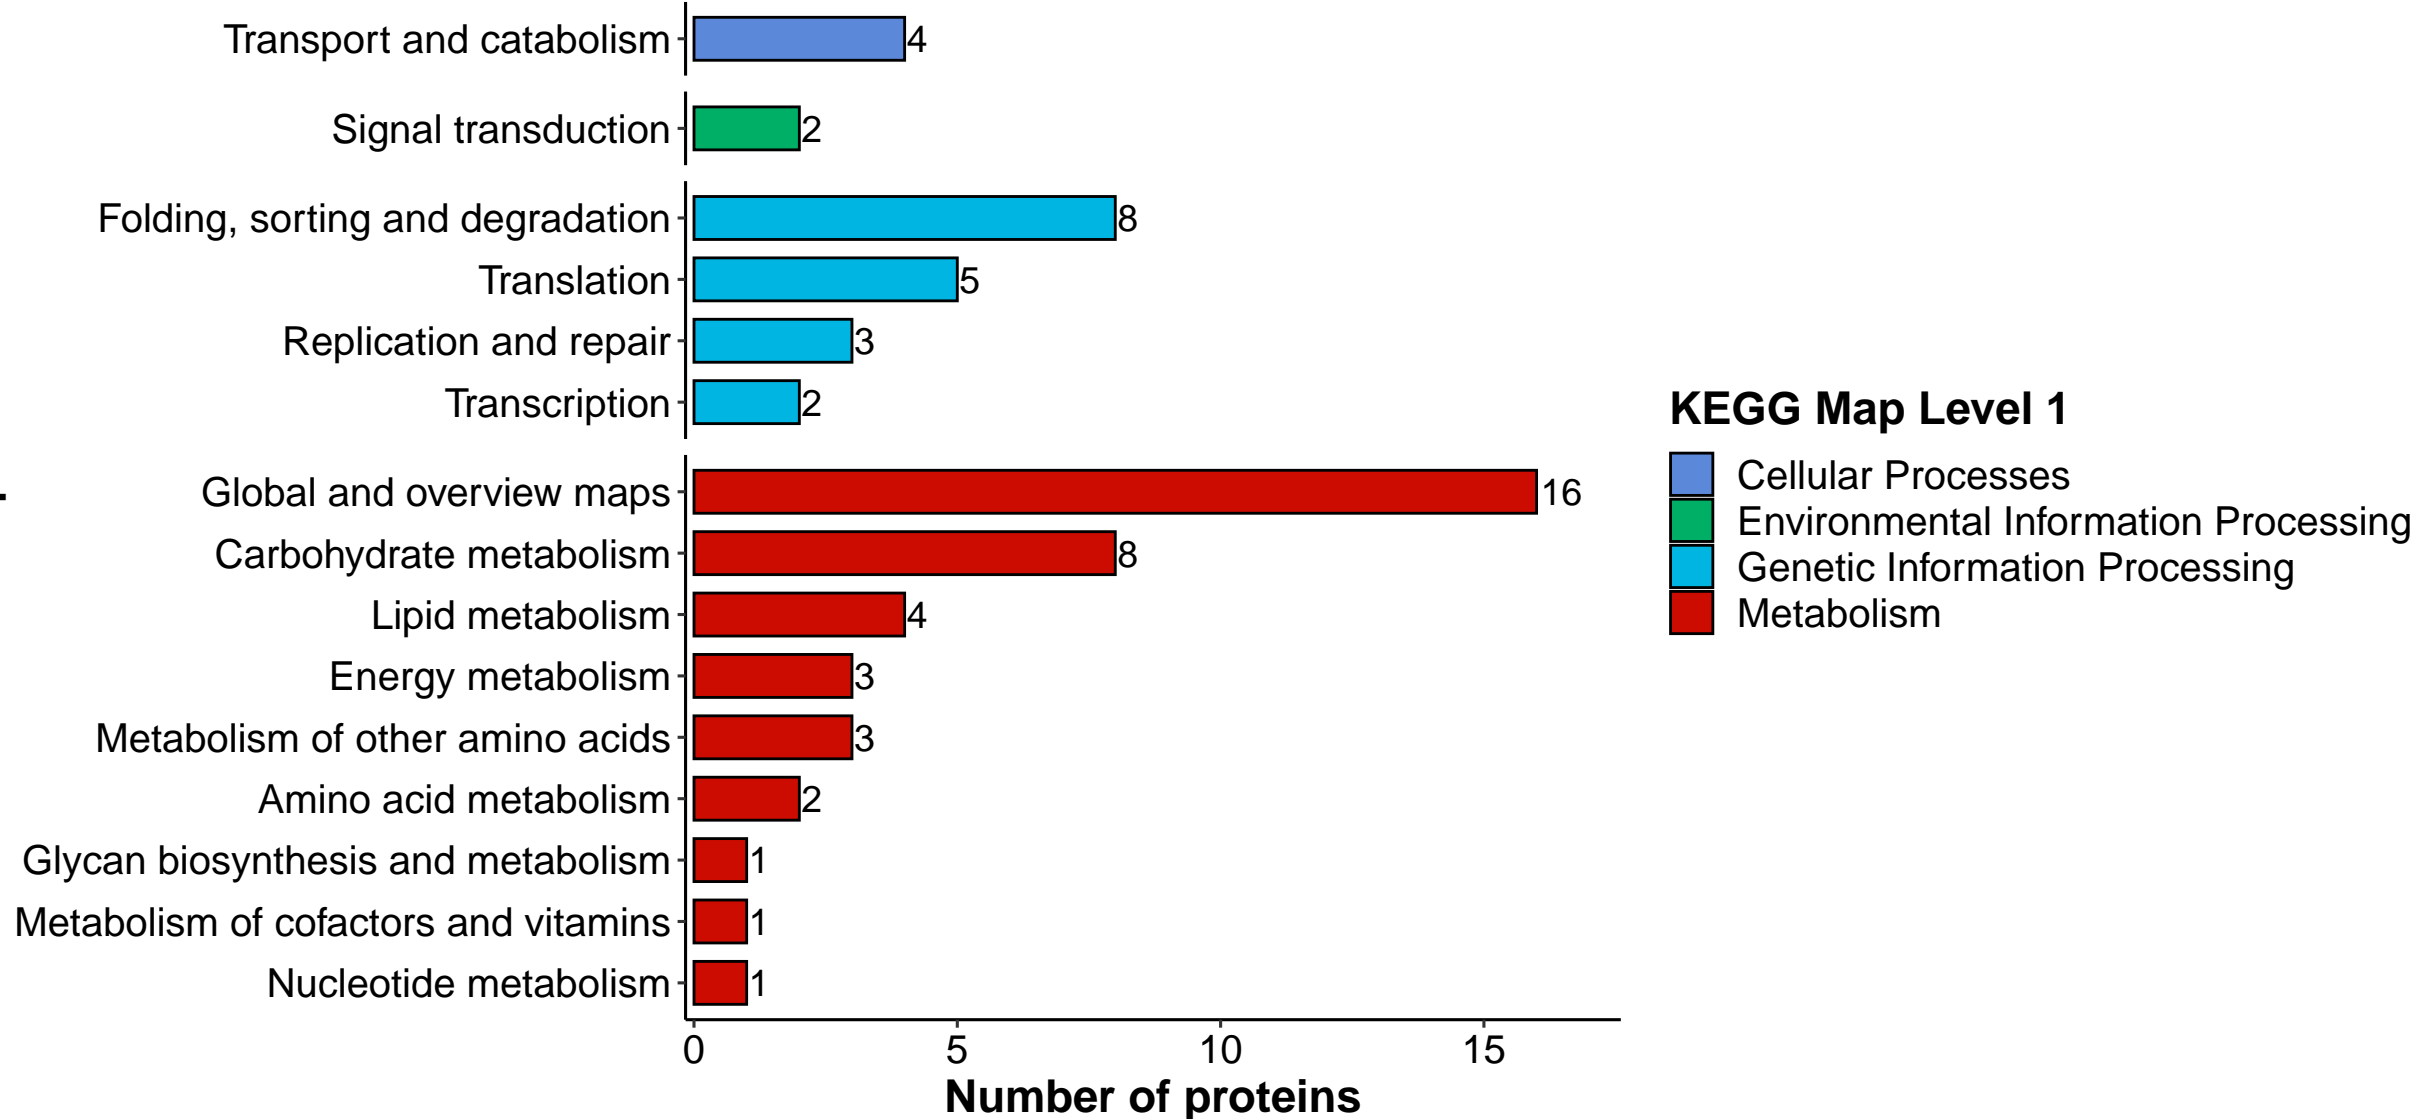

Supplement: Supplementary.zip [file Supplementary.zip]

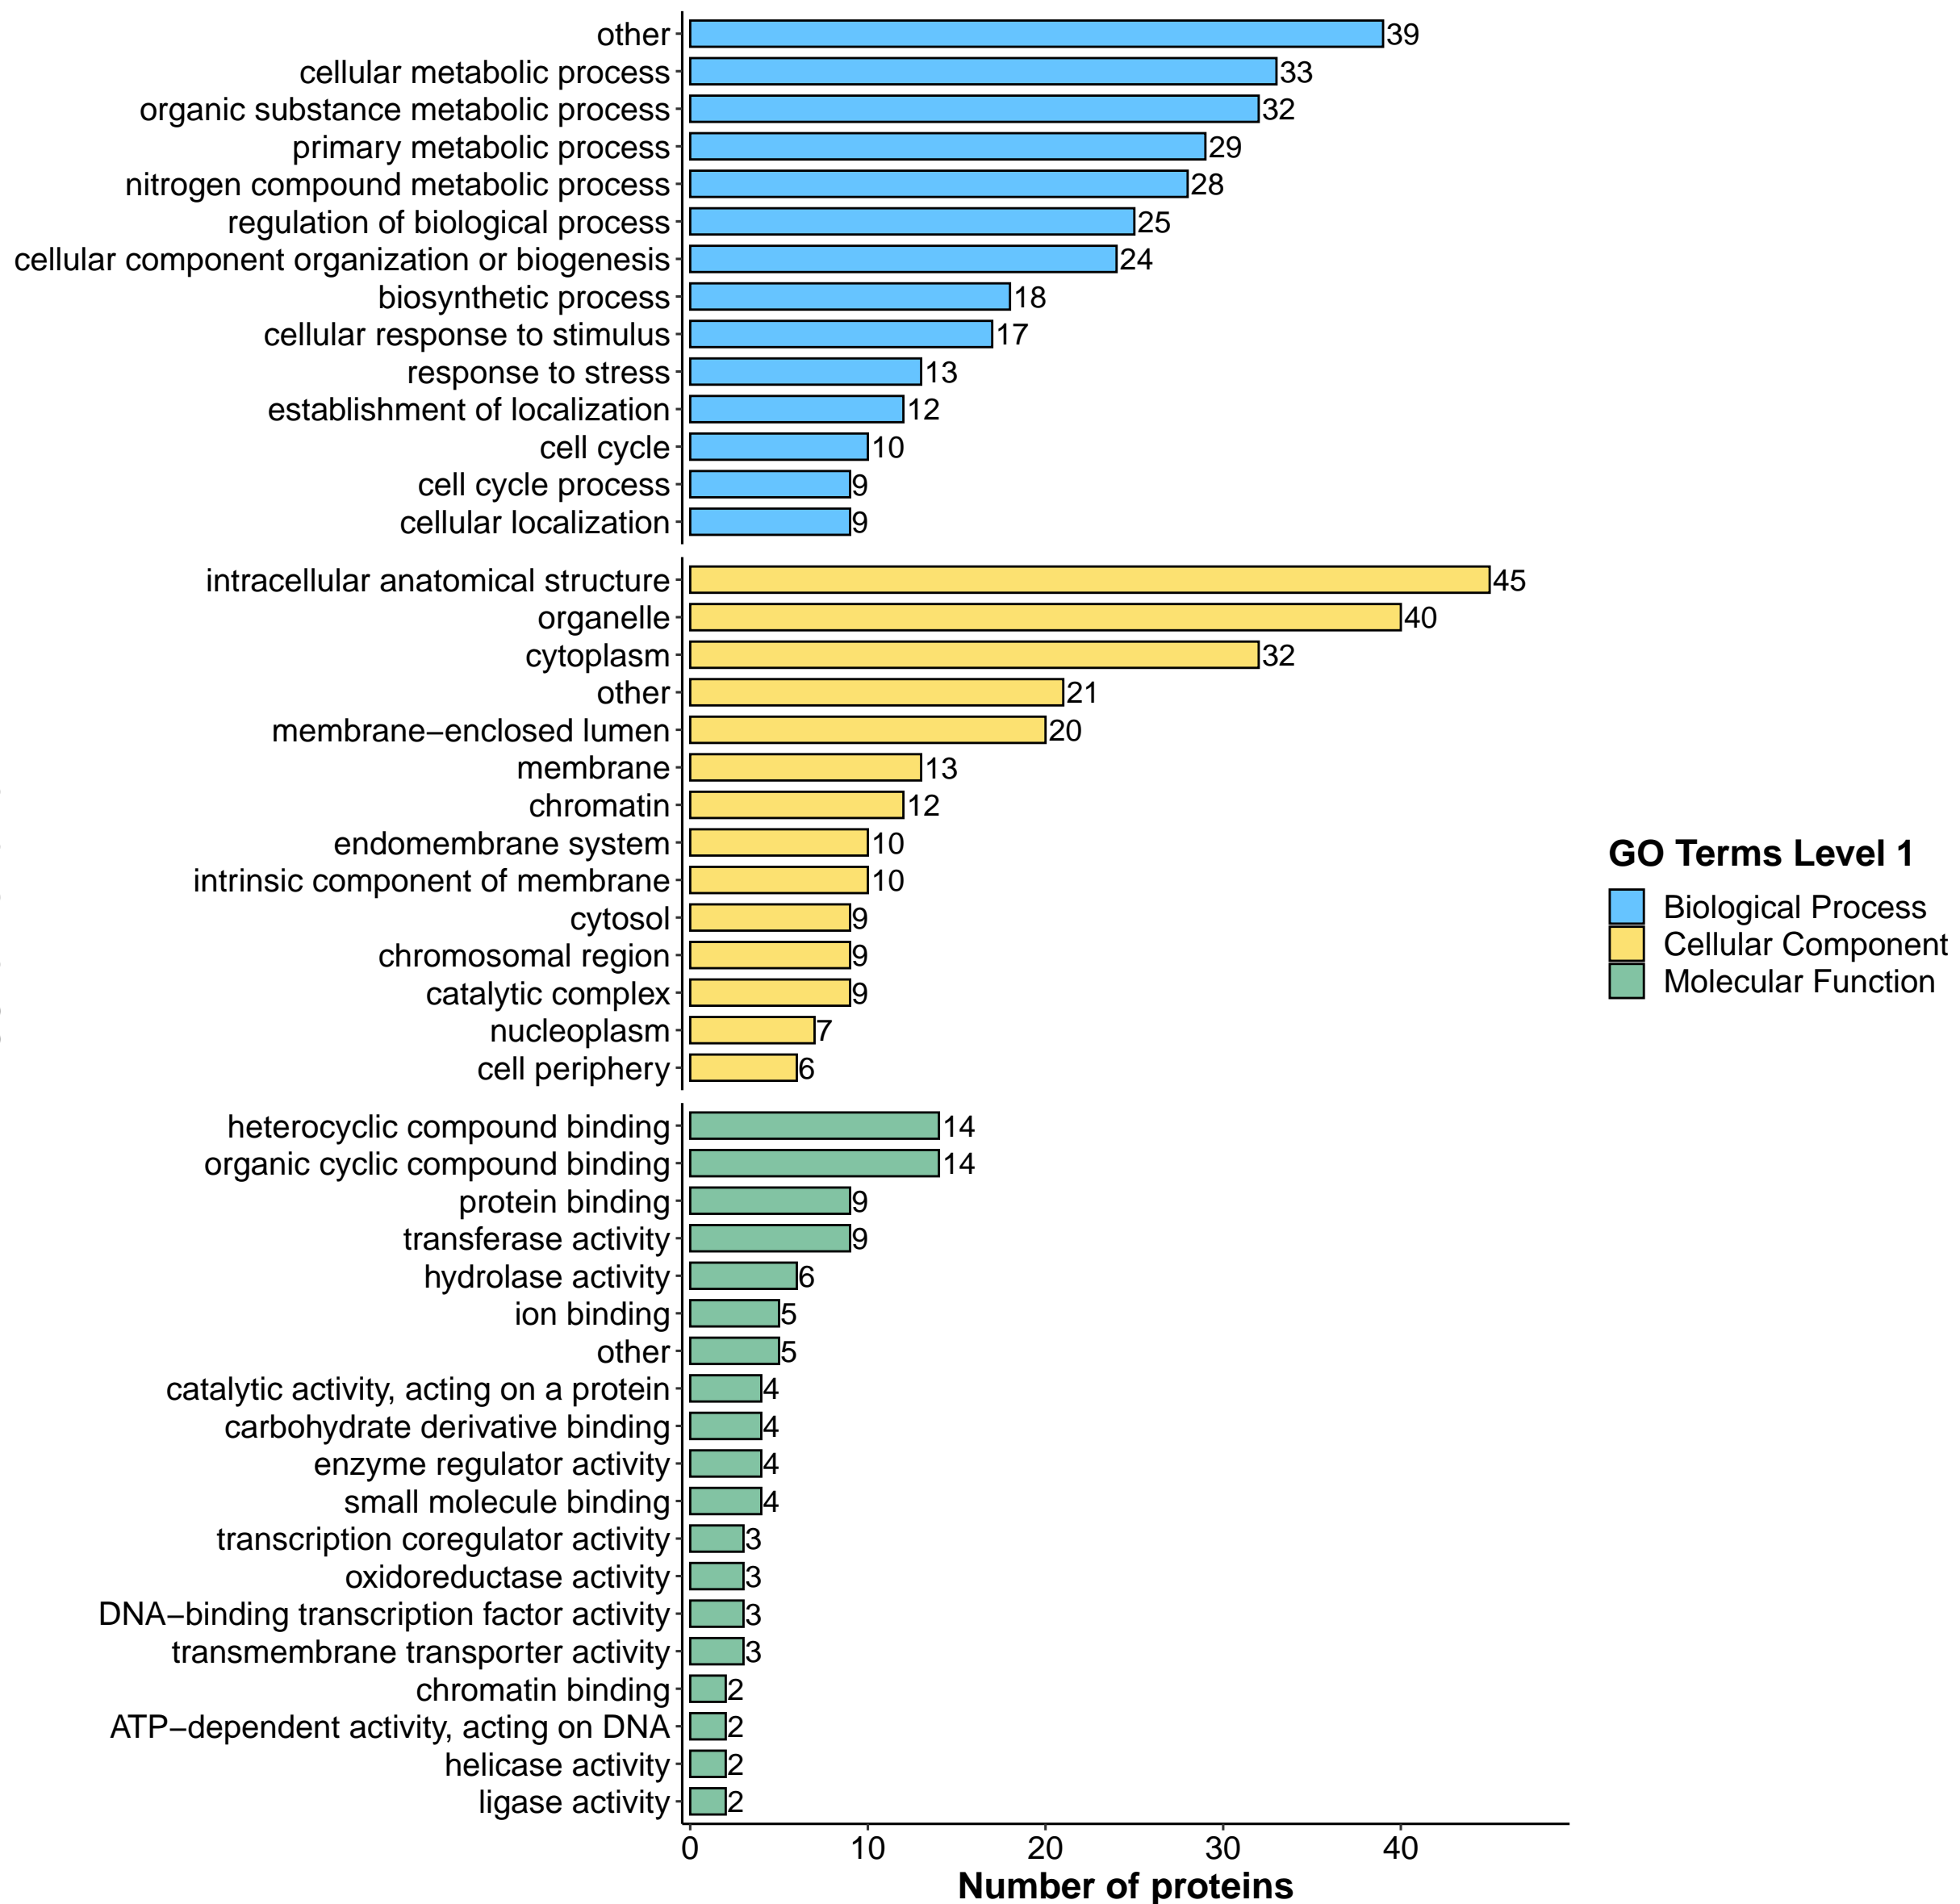

Supplement: Supplementary.zip [file Supplementary.zip]

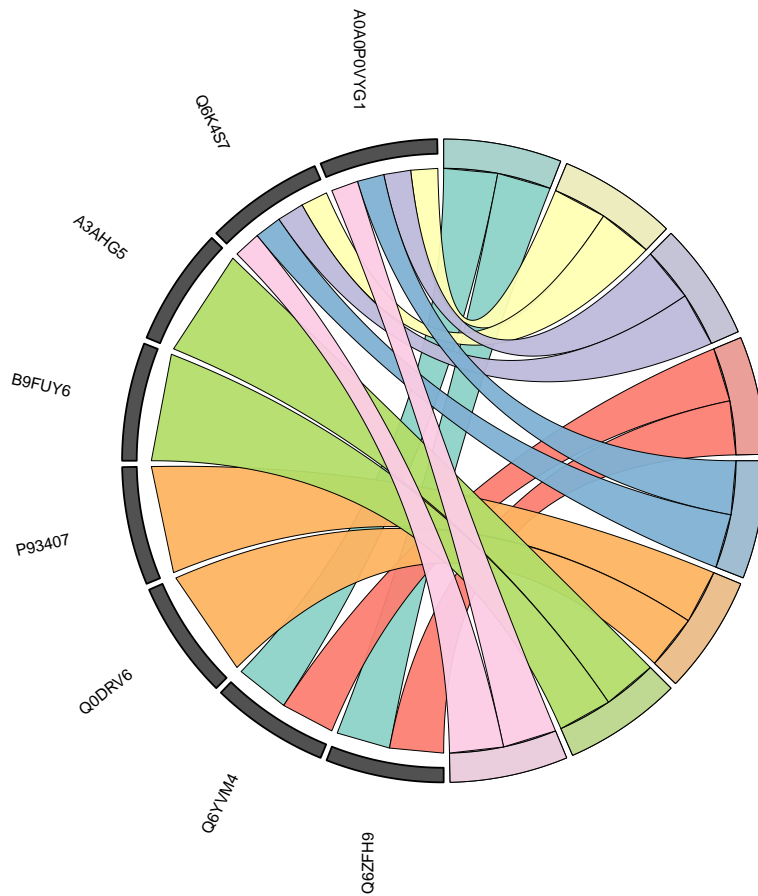

### BP Terms

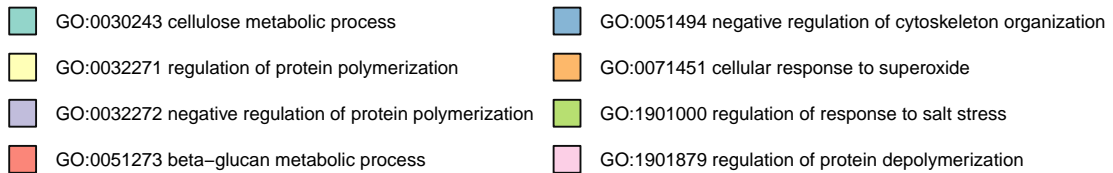

Supplement: Supplementary.zip [file Supplementary.zip]

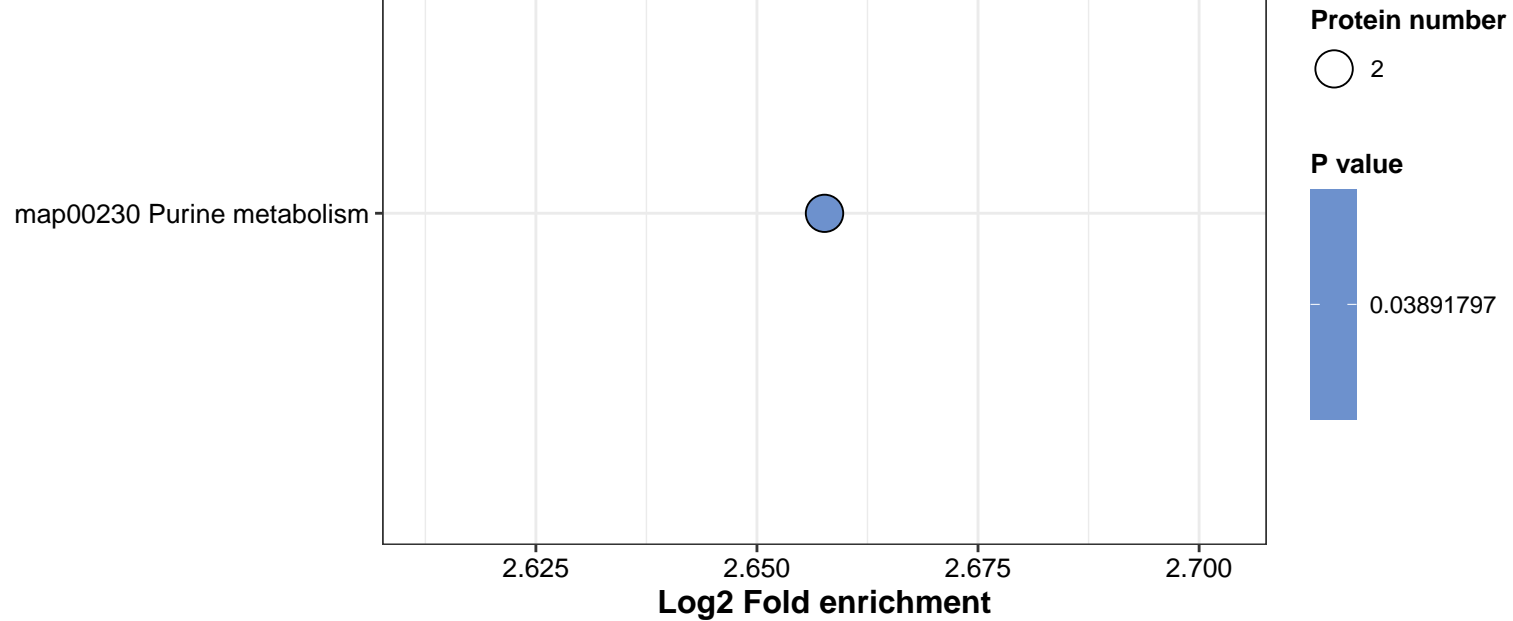

Supplement: Supplementary.zip [file Supplementary.zip]

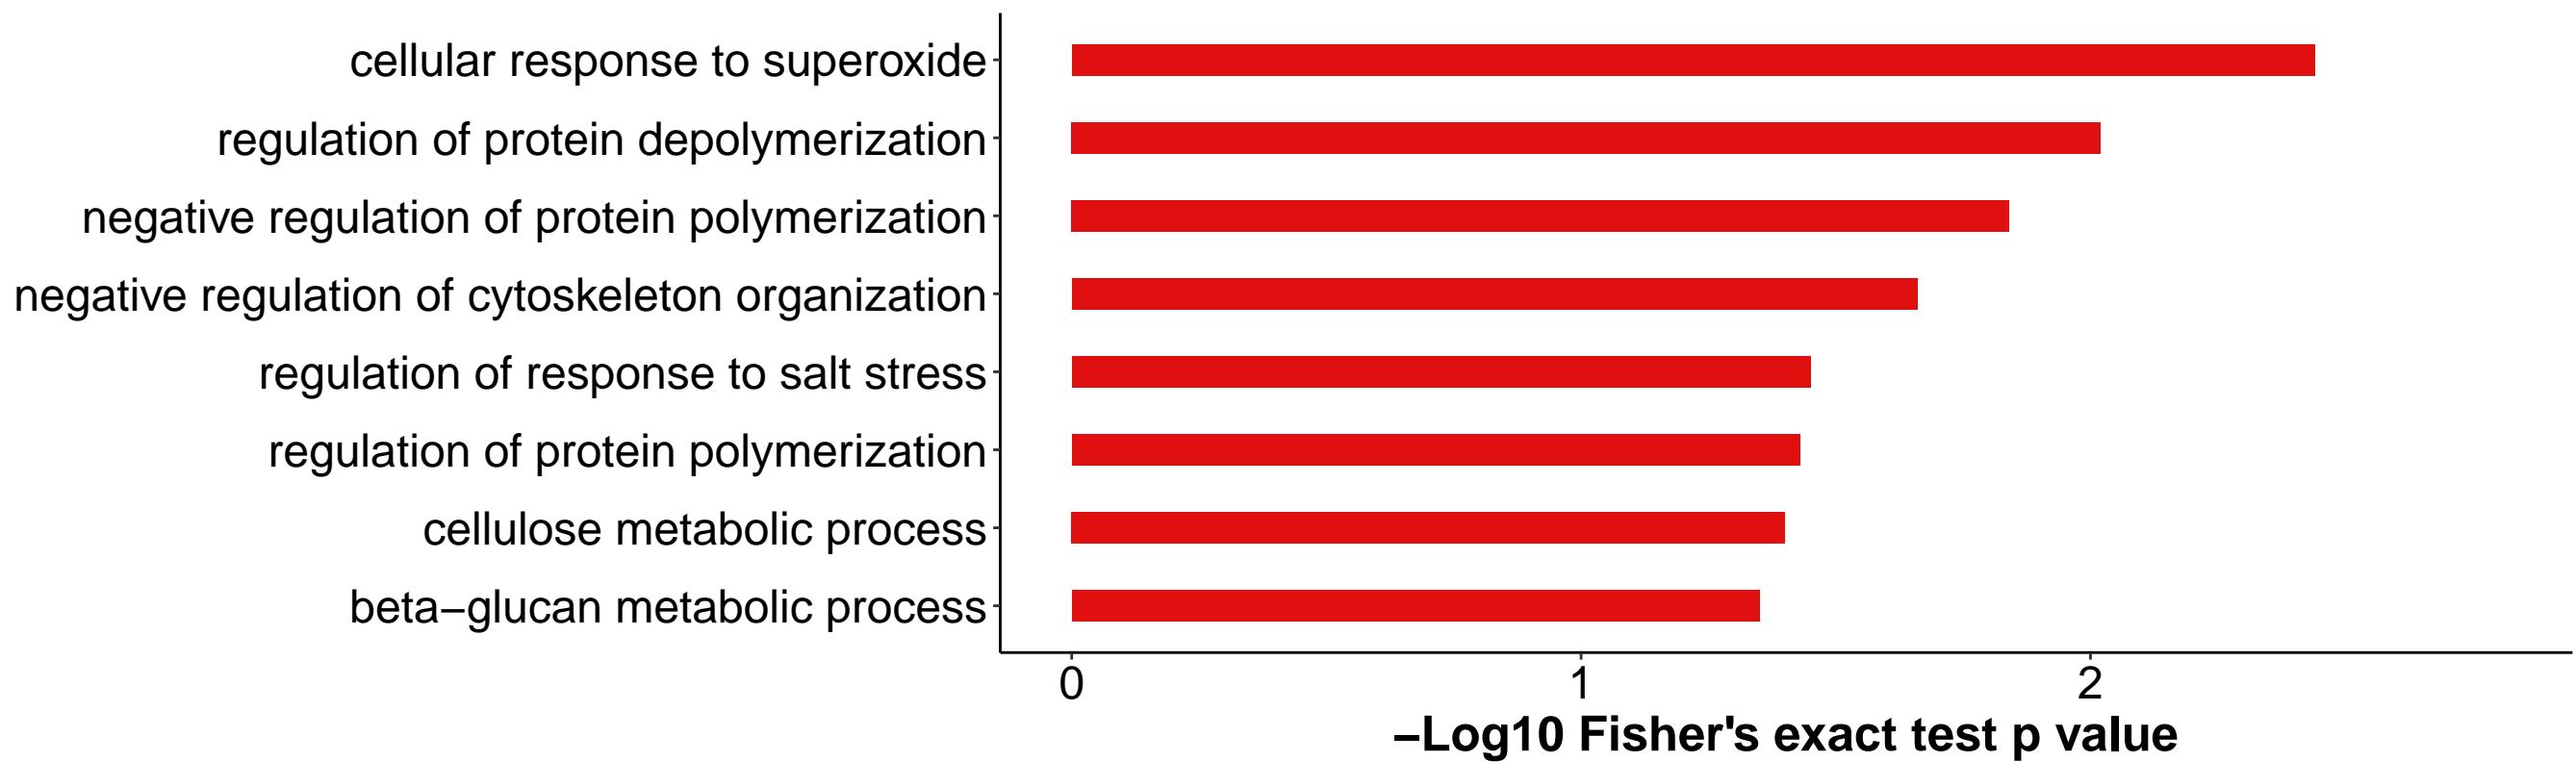

Supplement: Supplementary.zip [file Supplementary.zip]

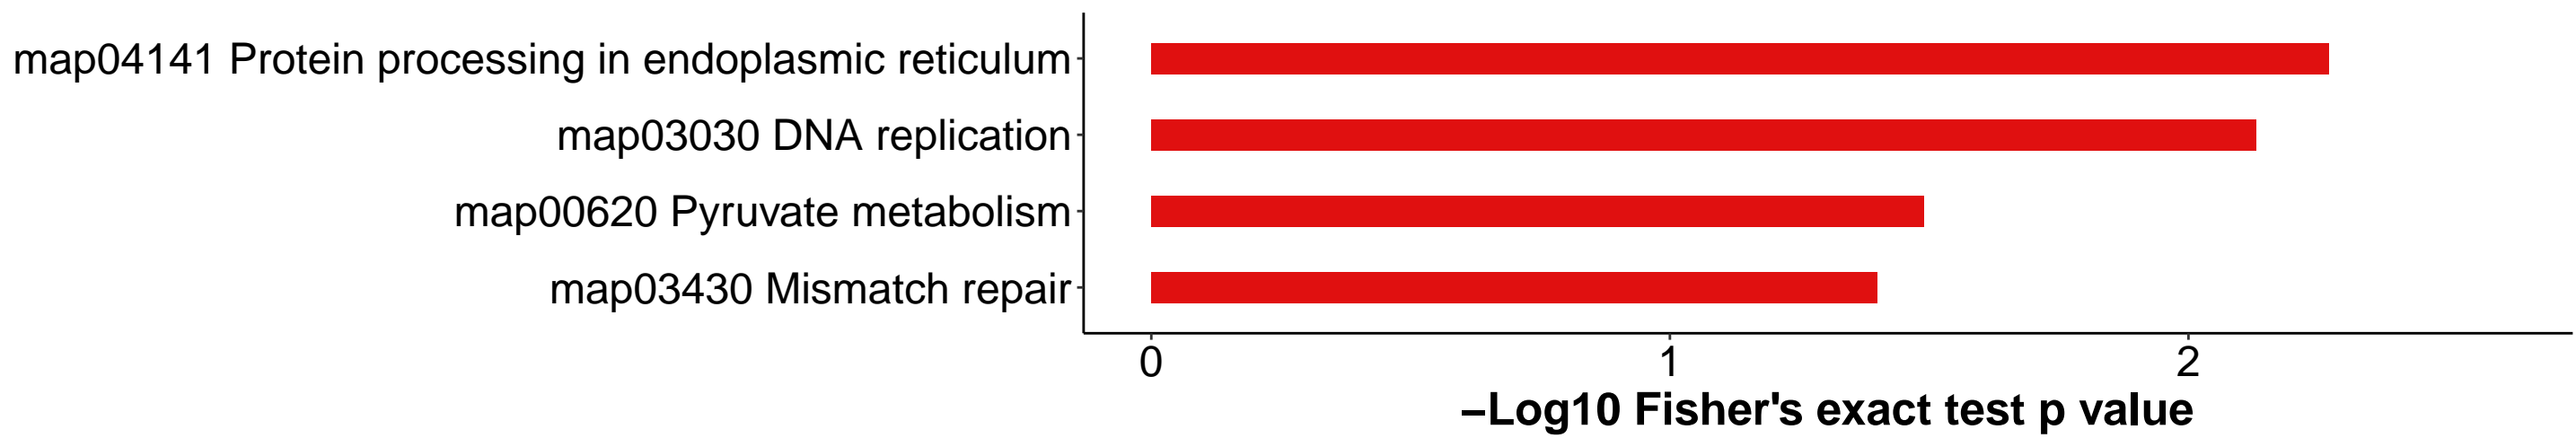

Supplement: Supplementary.zip [file Supplementary.zip]

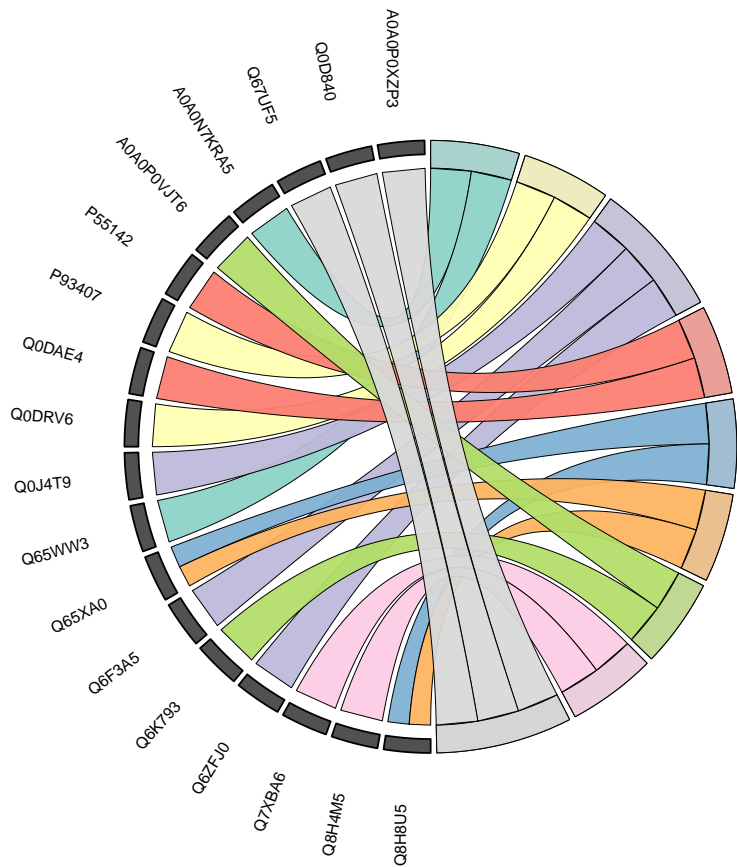

### Protein\_domain

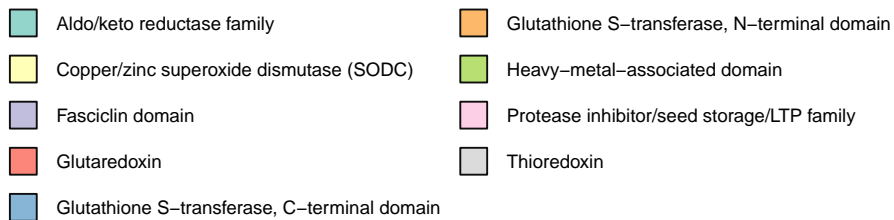

Supplement: Supplementary.zip [file Supplementary.zip]

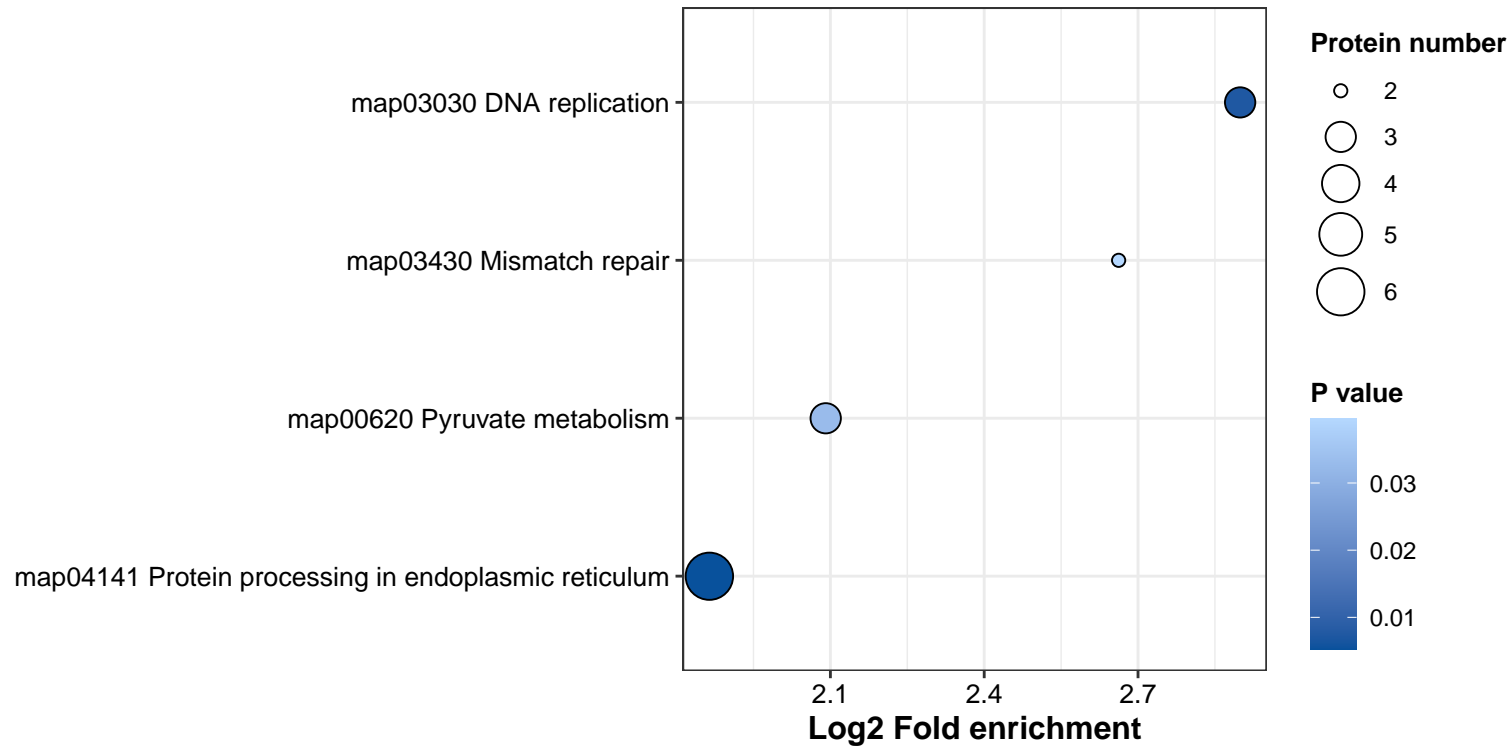

Supplement: Supplementary.zip [file Supplementary.zip]

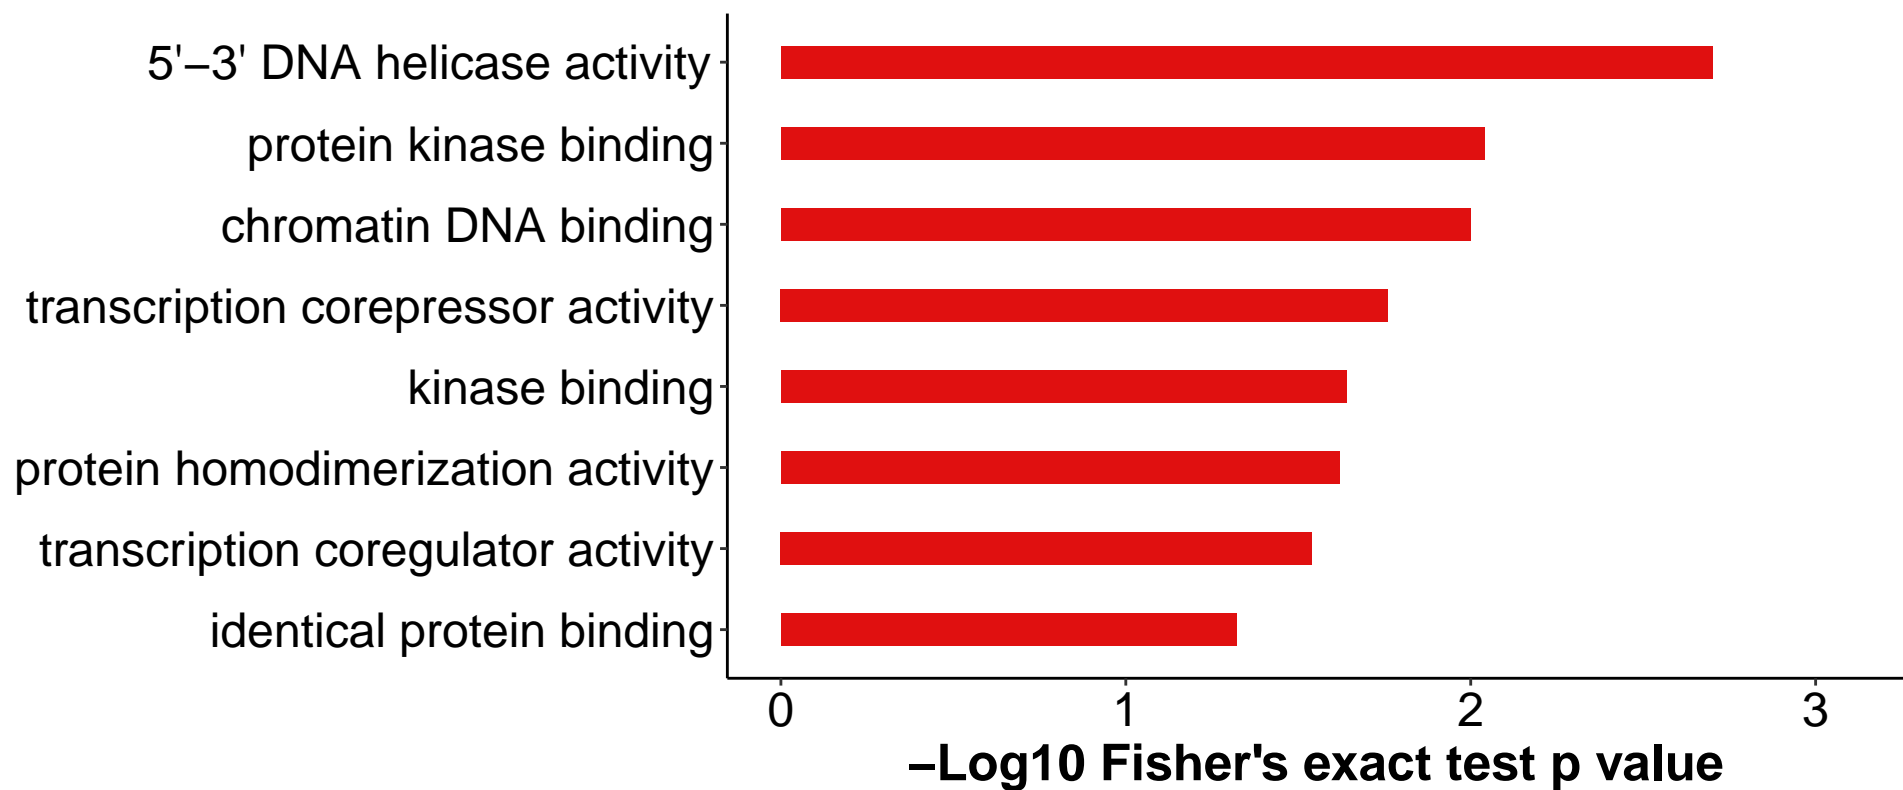

Supplement: Supplementary.zip [file Supplementary.zip]

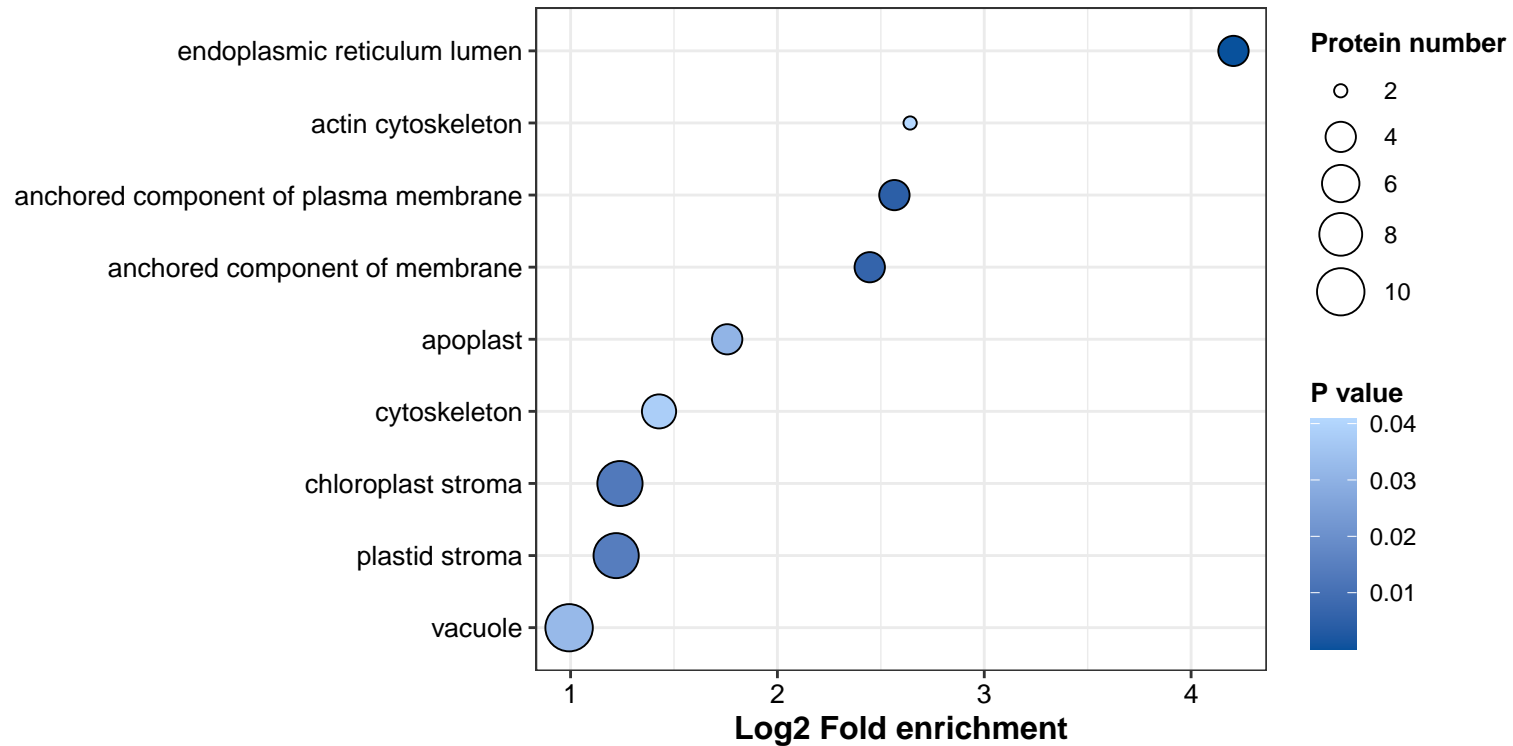

Supplement: Supplementary.zip [file Supplementary.zip]

map00230 Purine metabolism

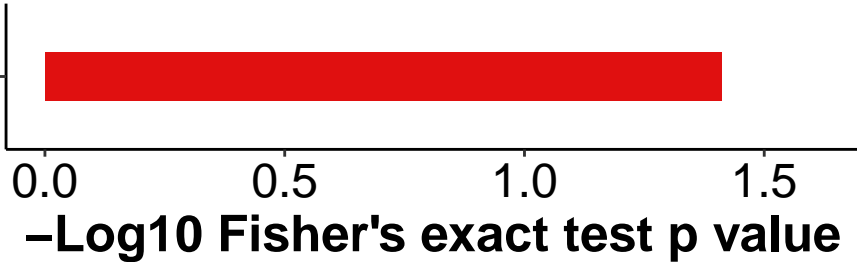

Supplement: Supplementary.zip [file Supplementary.zip]

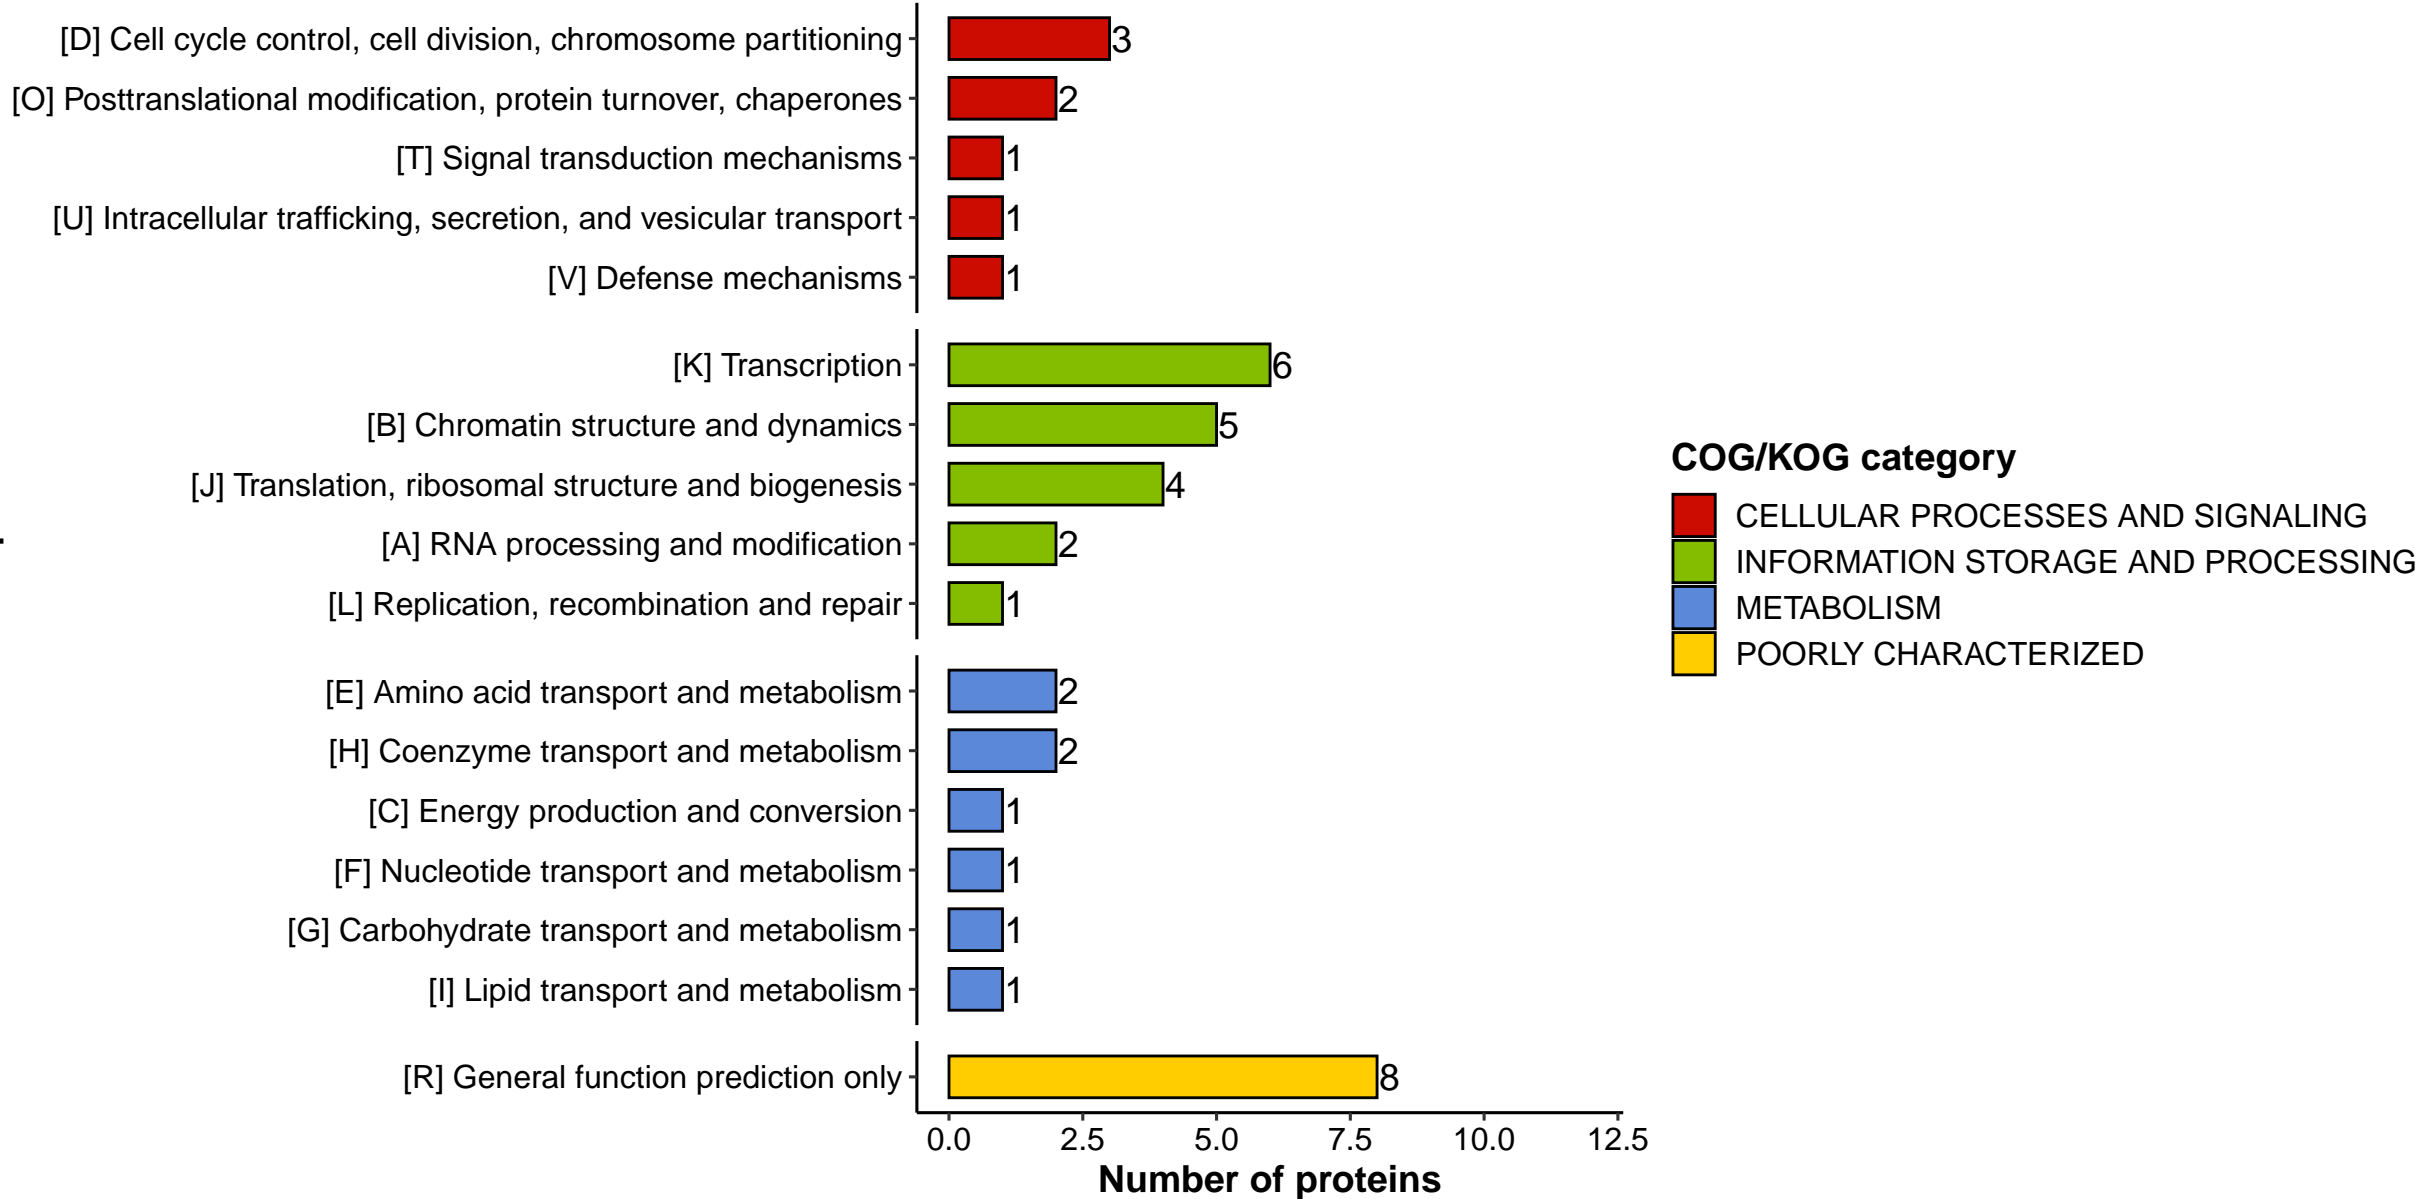

Supplement: Supplementary.zip [file Supplementary.zip]

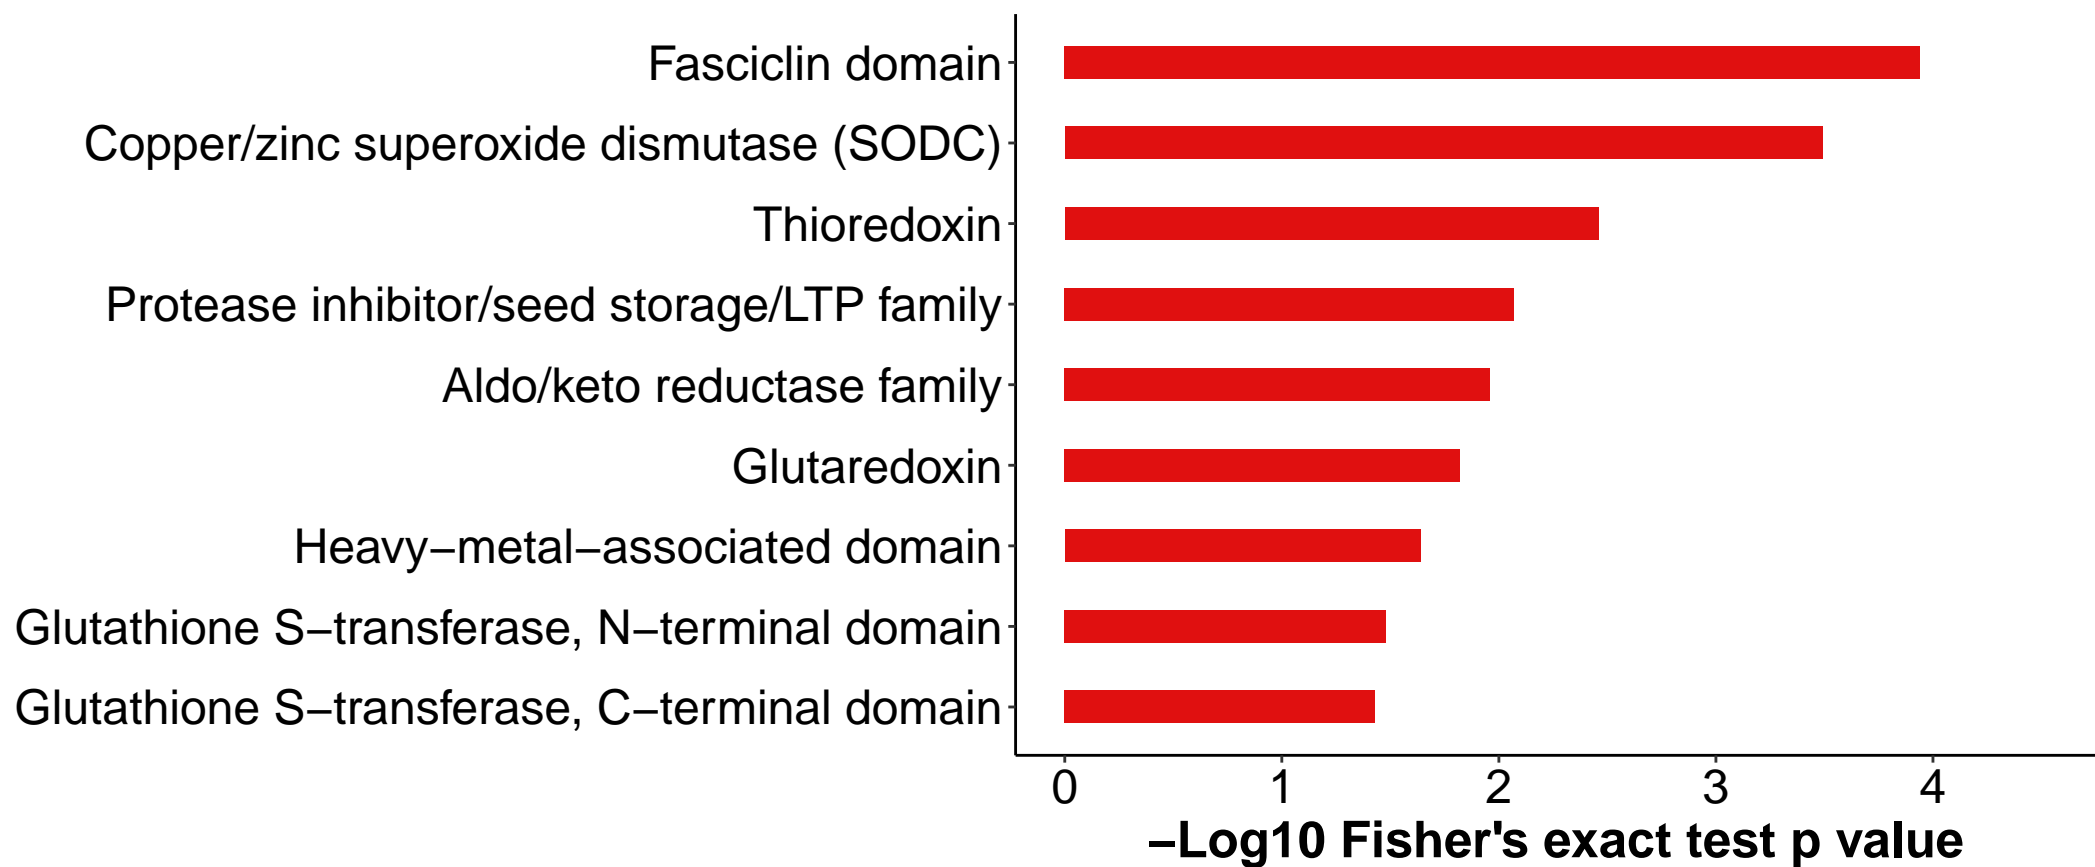

Supplement: Supplementary.zip [file Supplementary.zip]

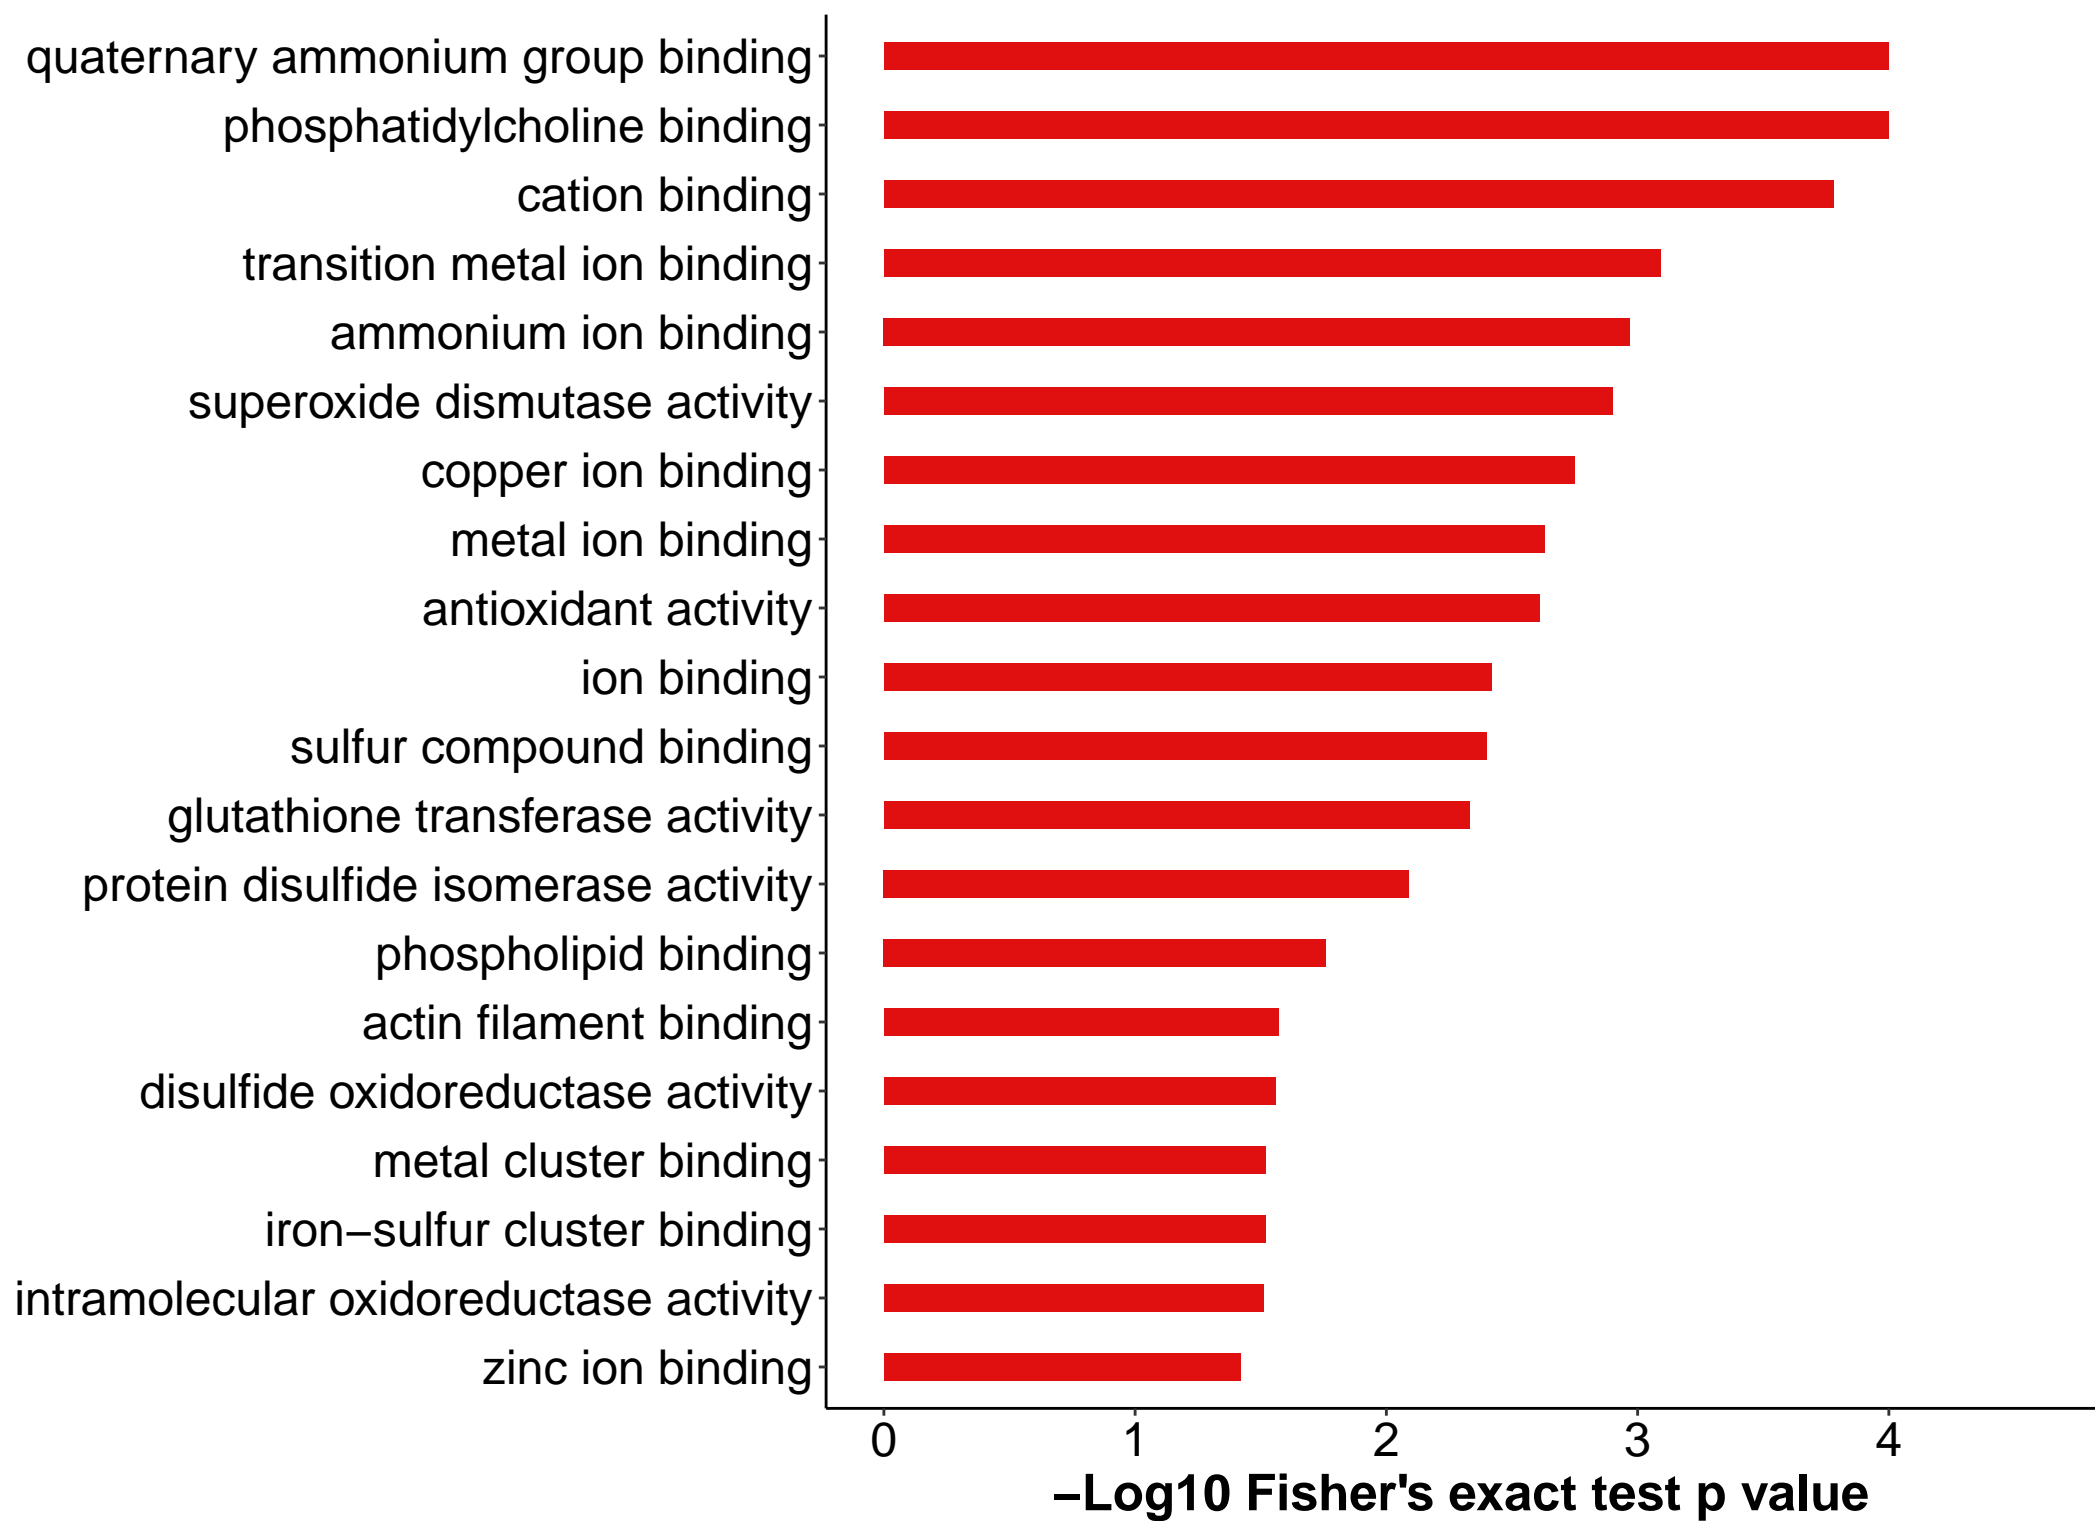

Supplement: Supplementary.zip [file Supplementary.zip]

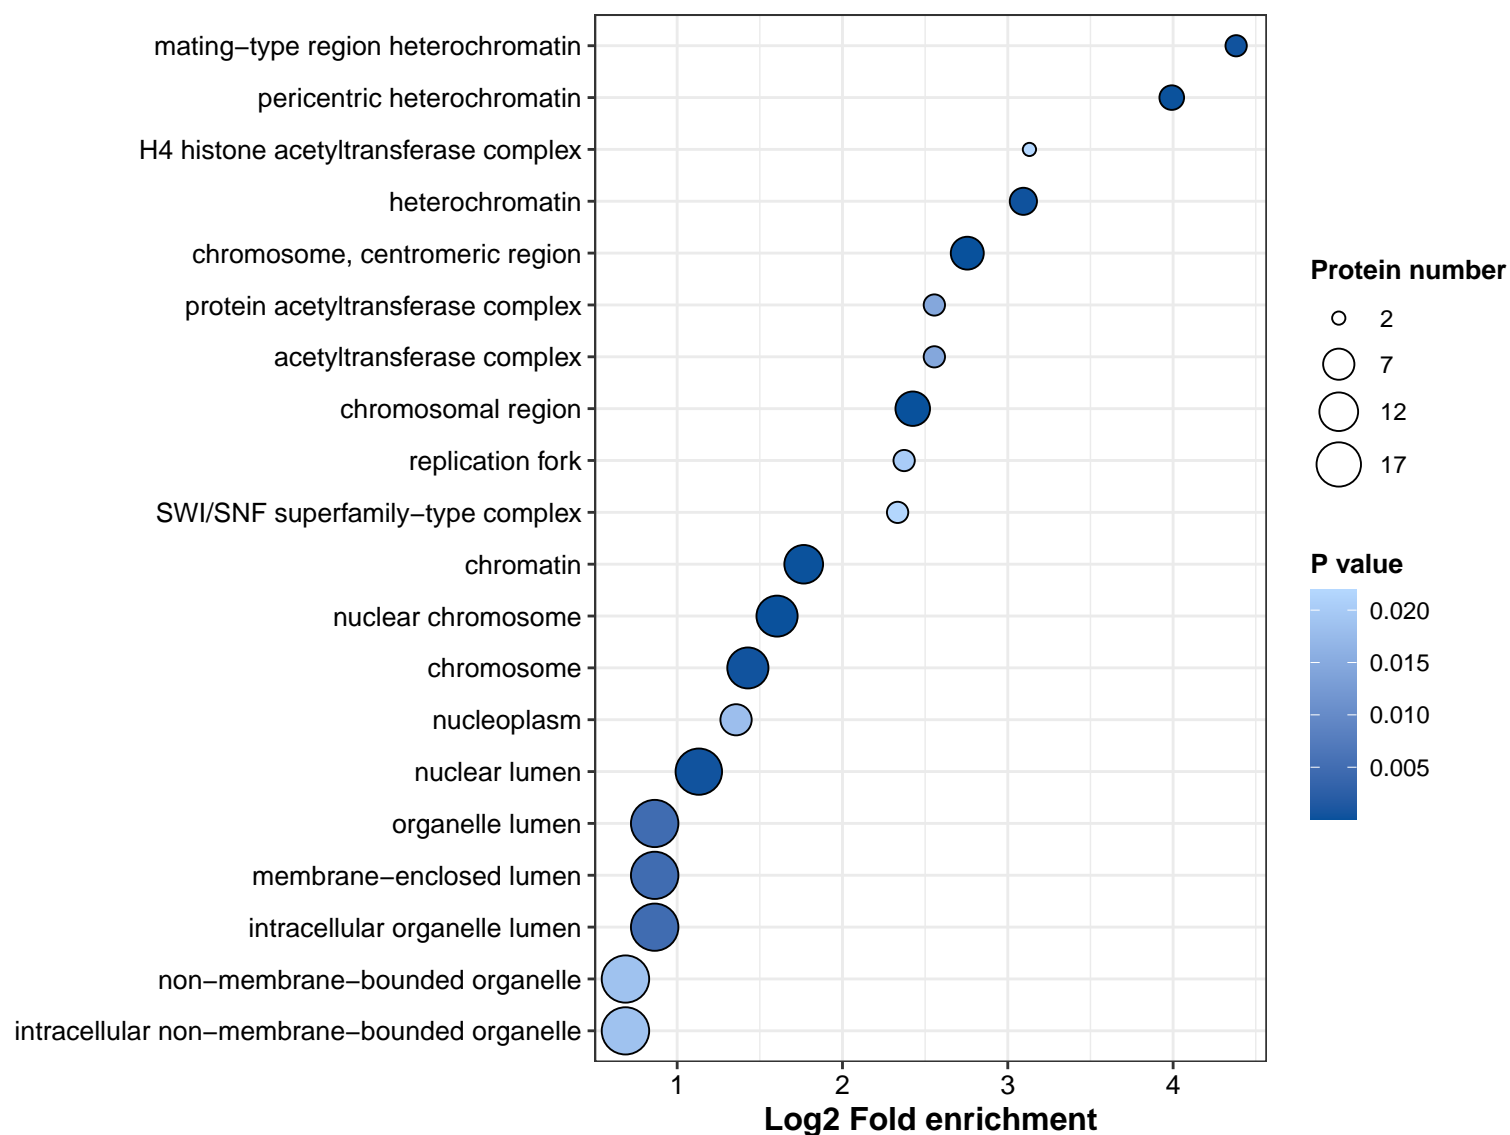

Supplement: Supplementary.zip [file Supplementary.zip]

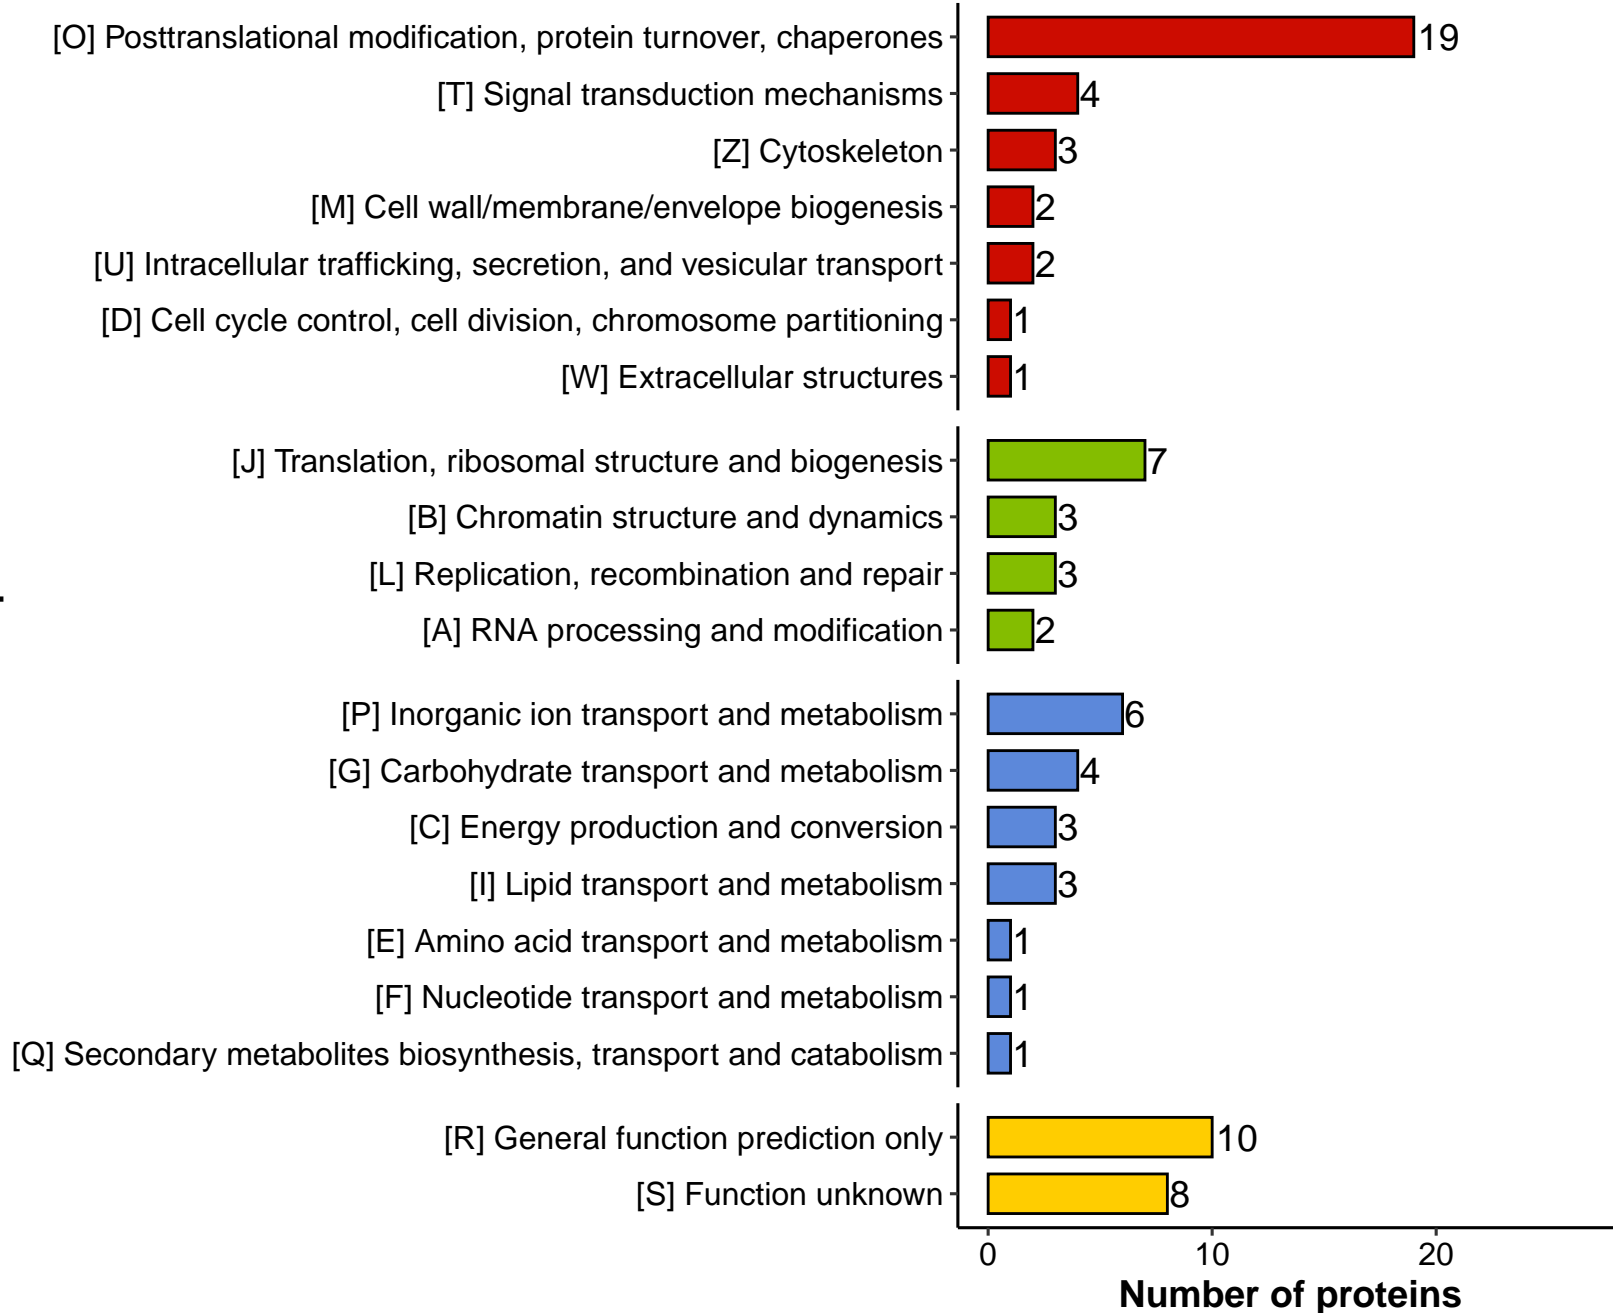

## COG/KOG category

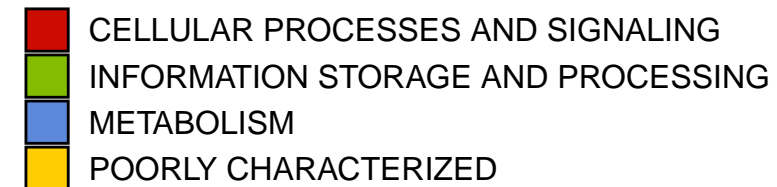

Supplement: Supplementary.zip [file Supplementary.zip]

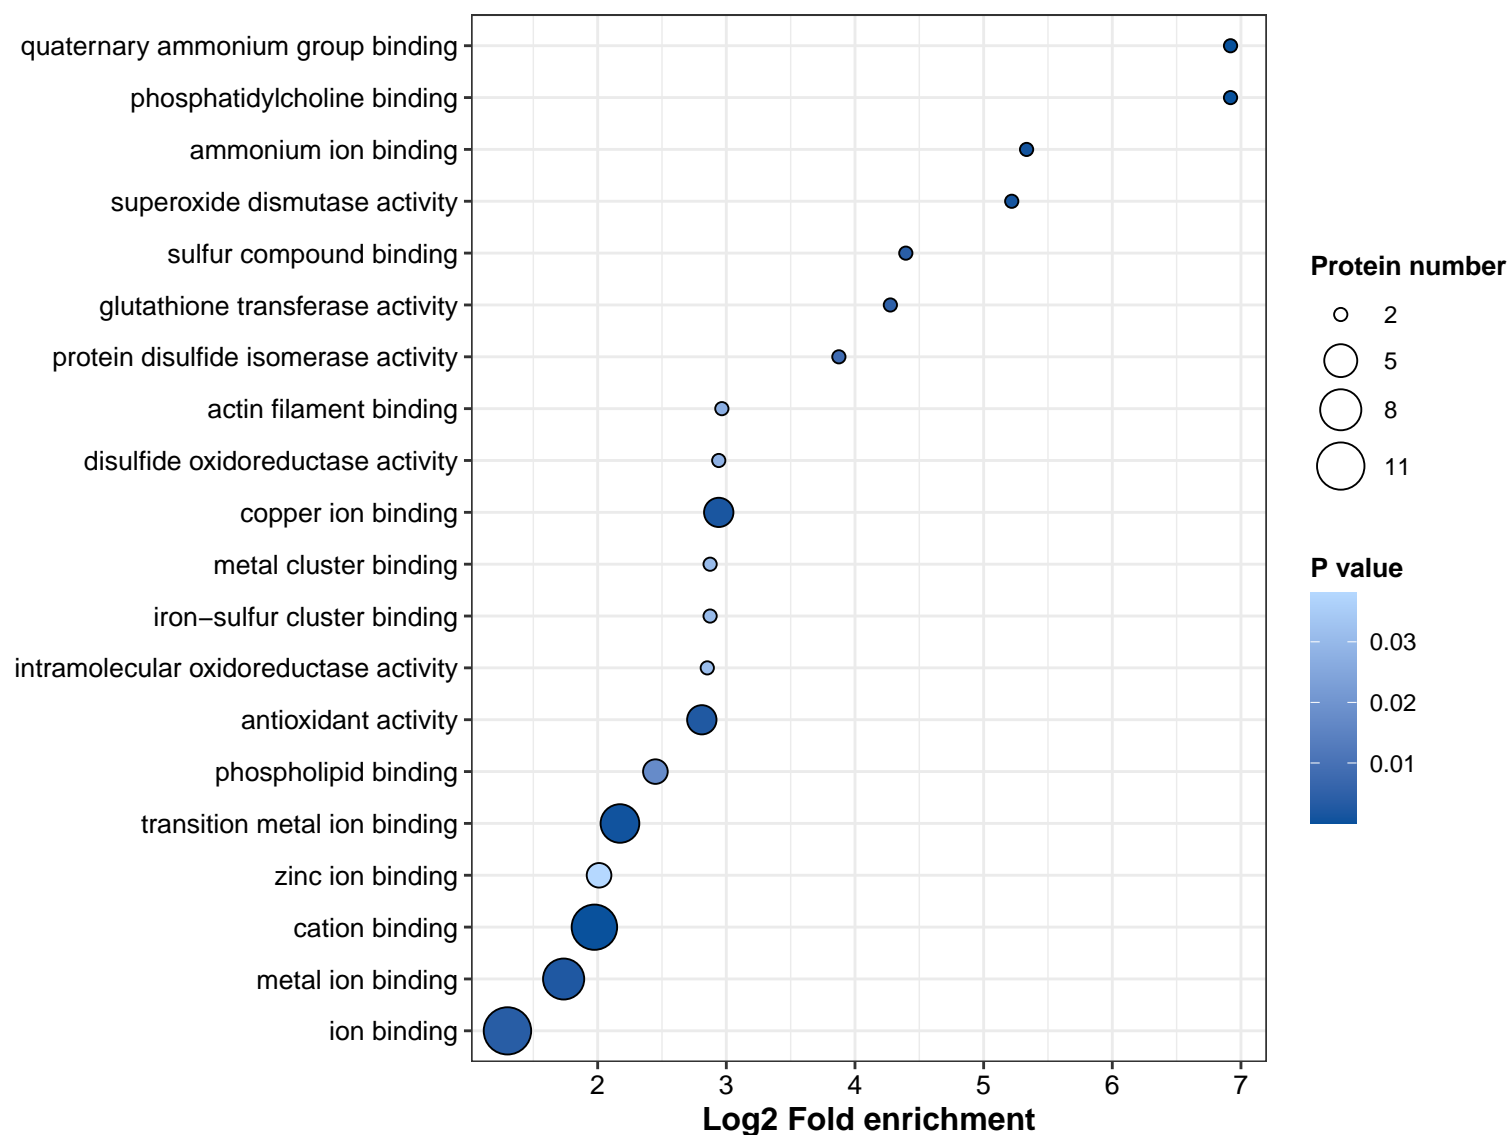

Supplement: Supplementary.zip [file Supplementary.zip]

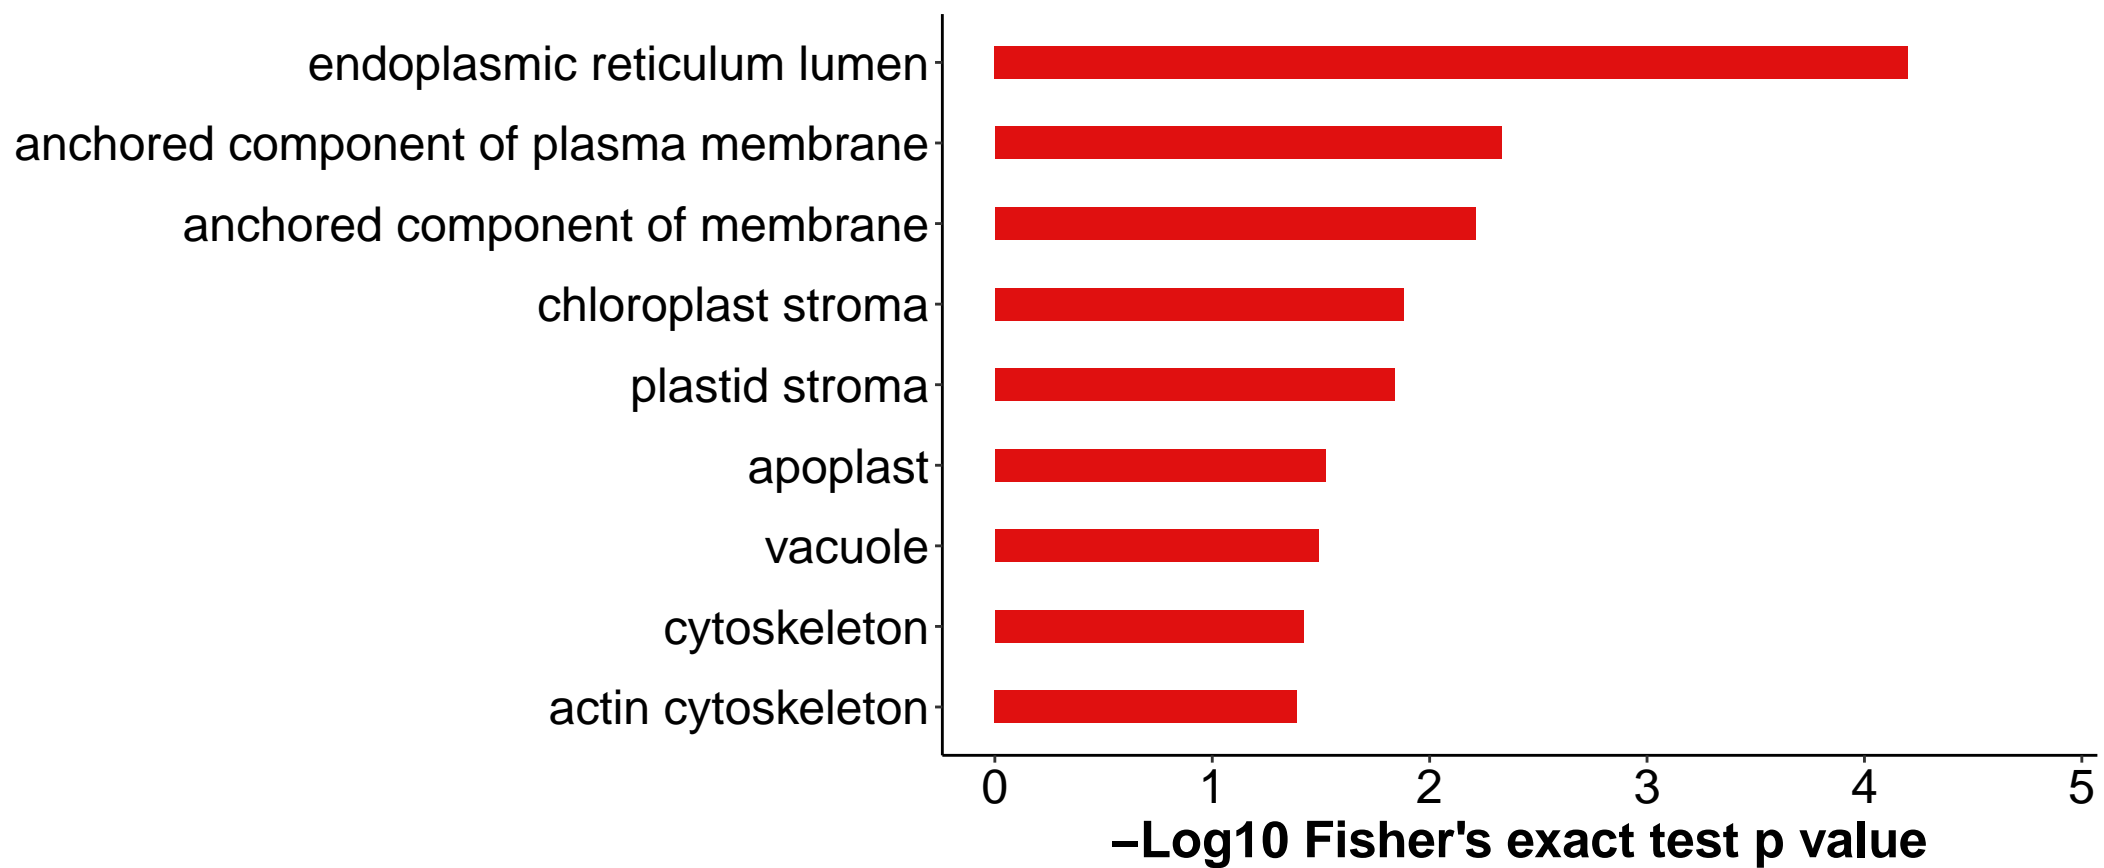

Supplement: Supplementary.zip [file Supplementary.zip]

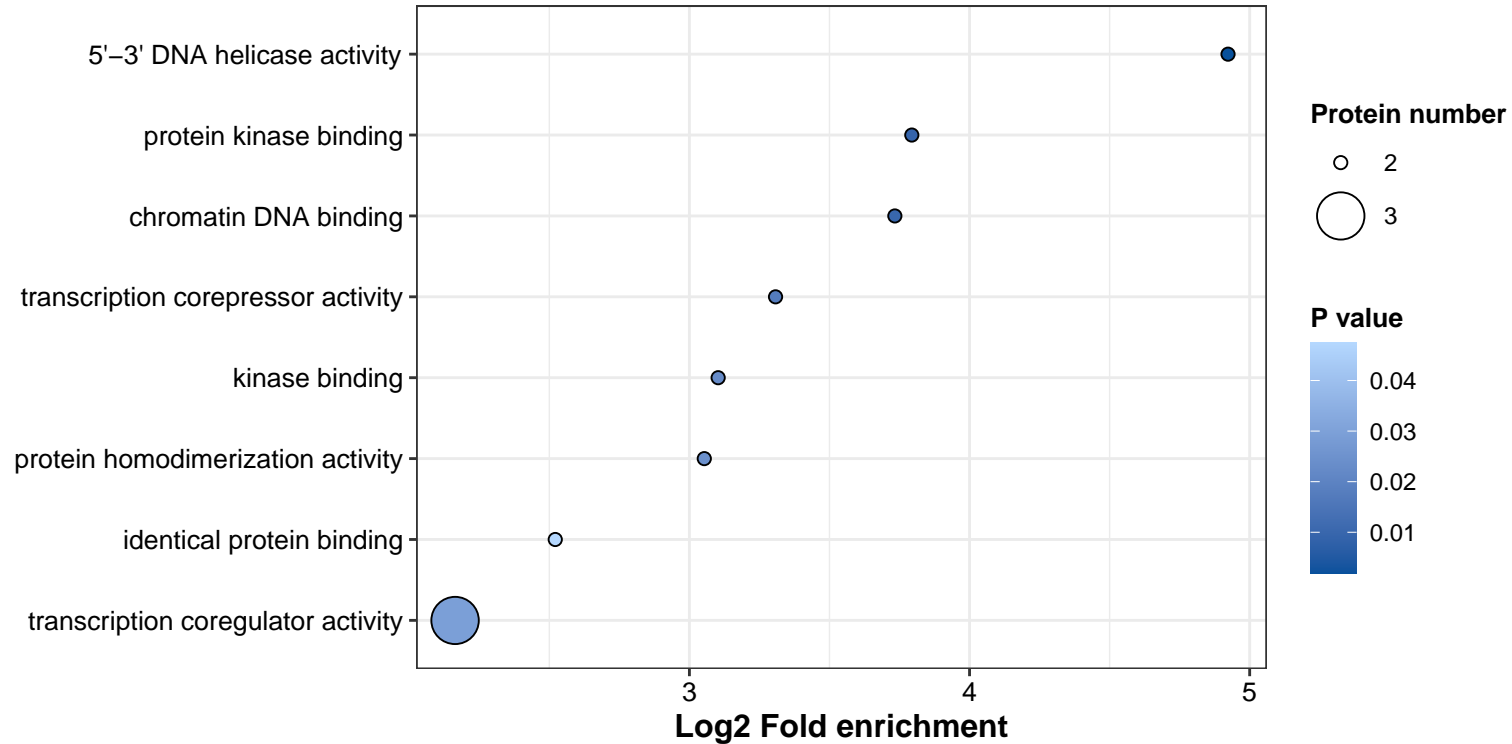

Supplement: Supplementary.zip [file Supplementary.zip]

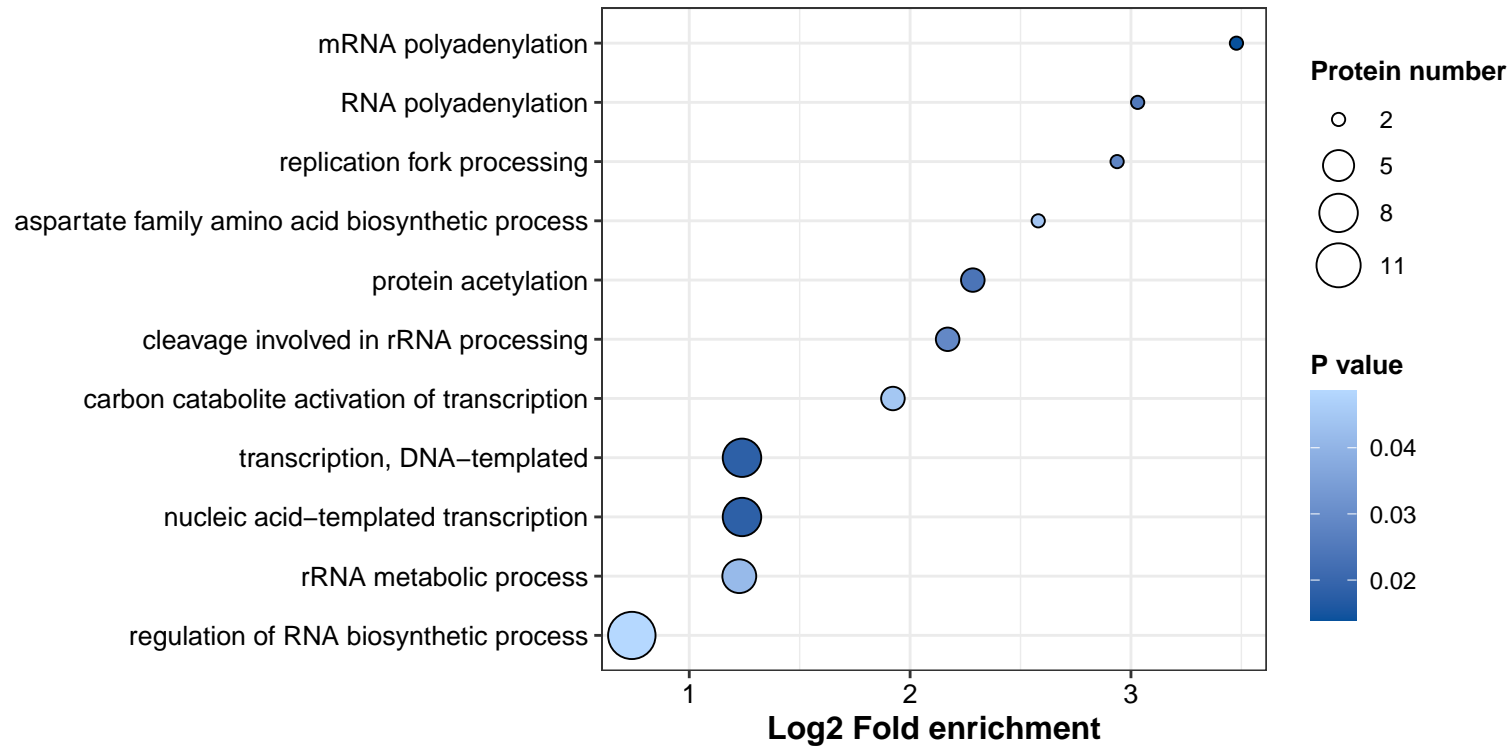

Supplement: Supplementary.zip [file Supplementary.zip]

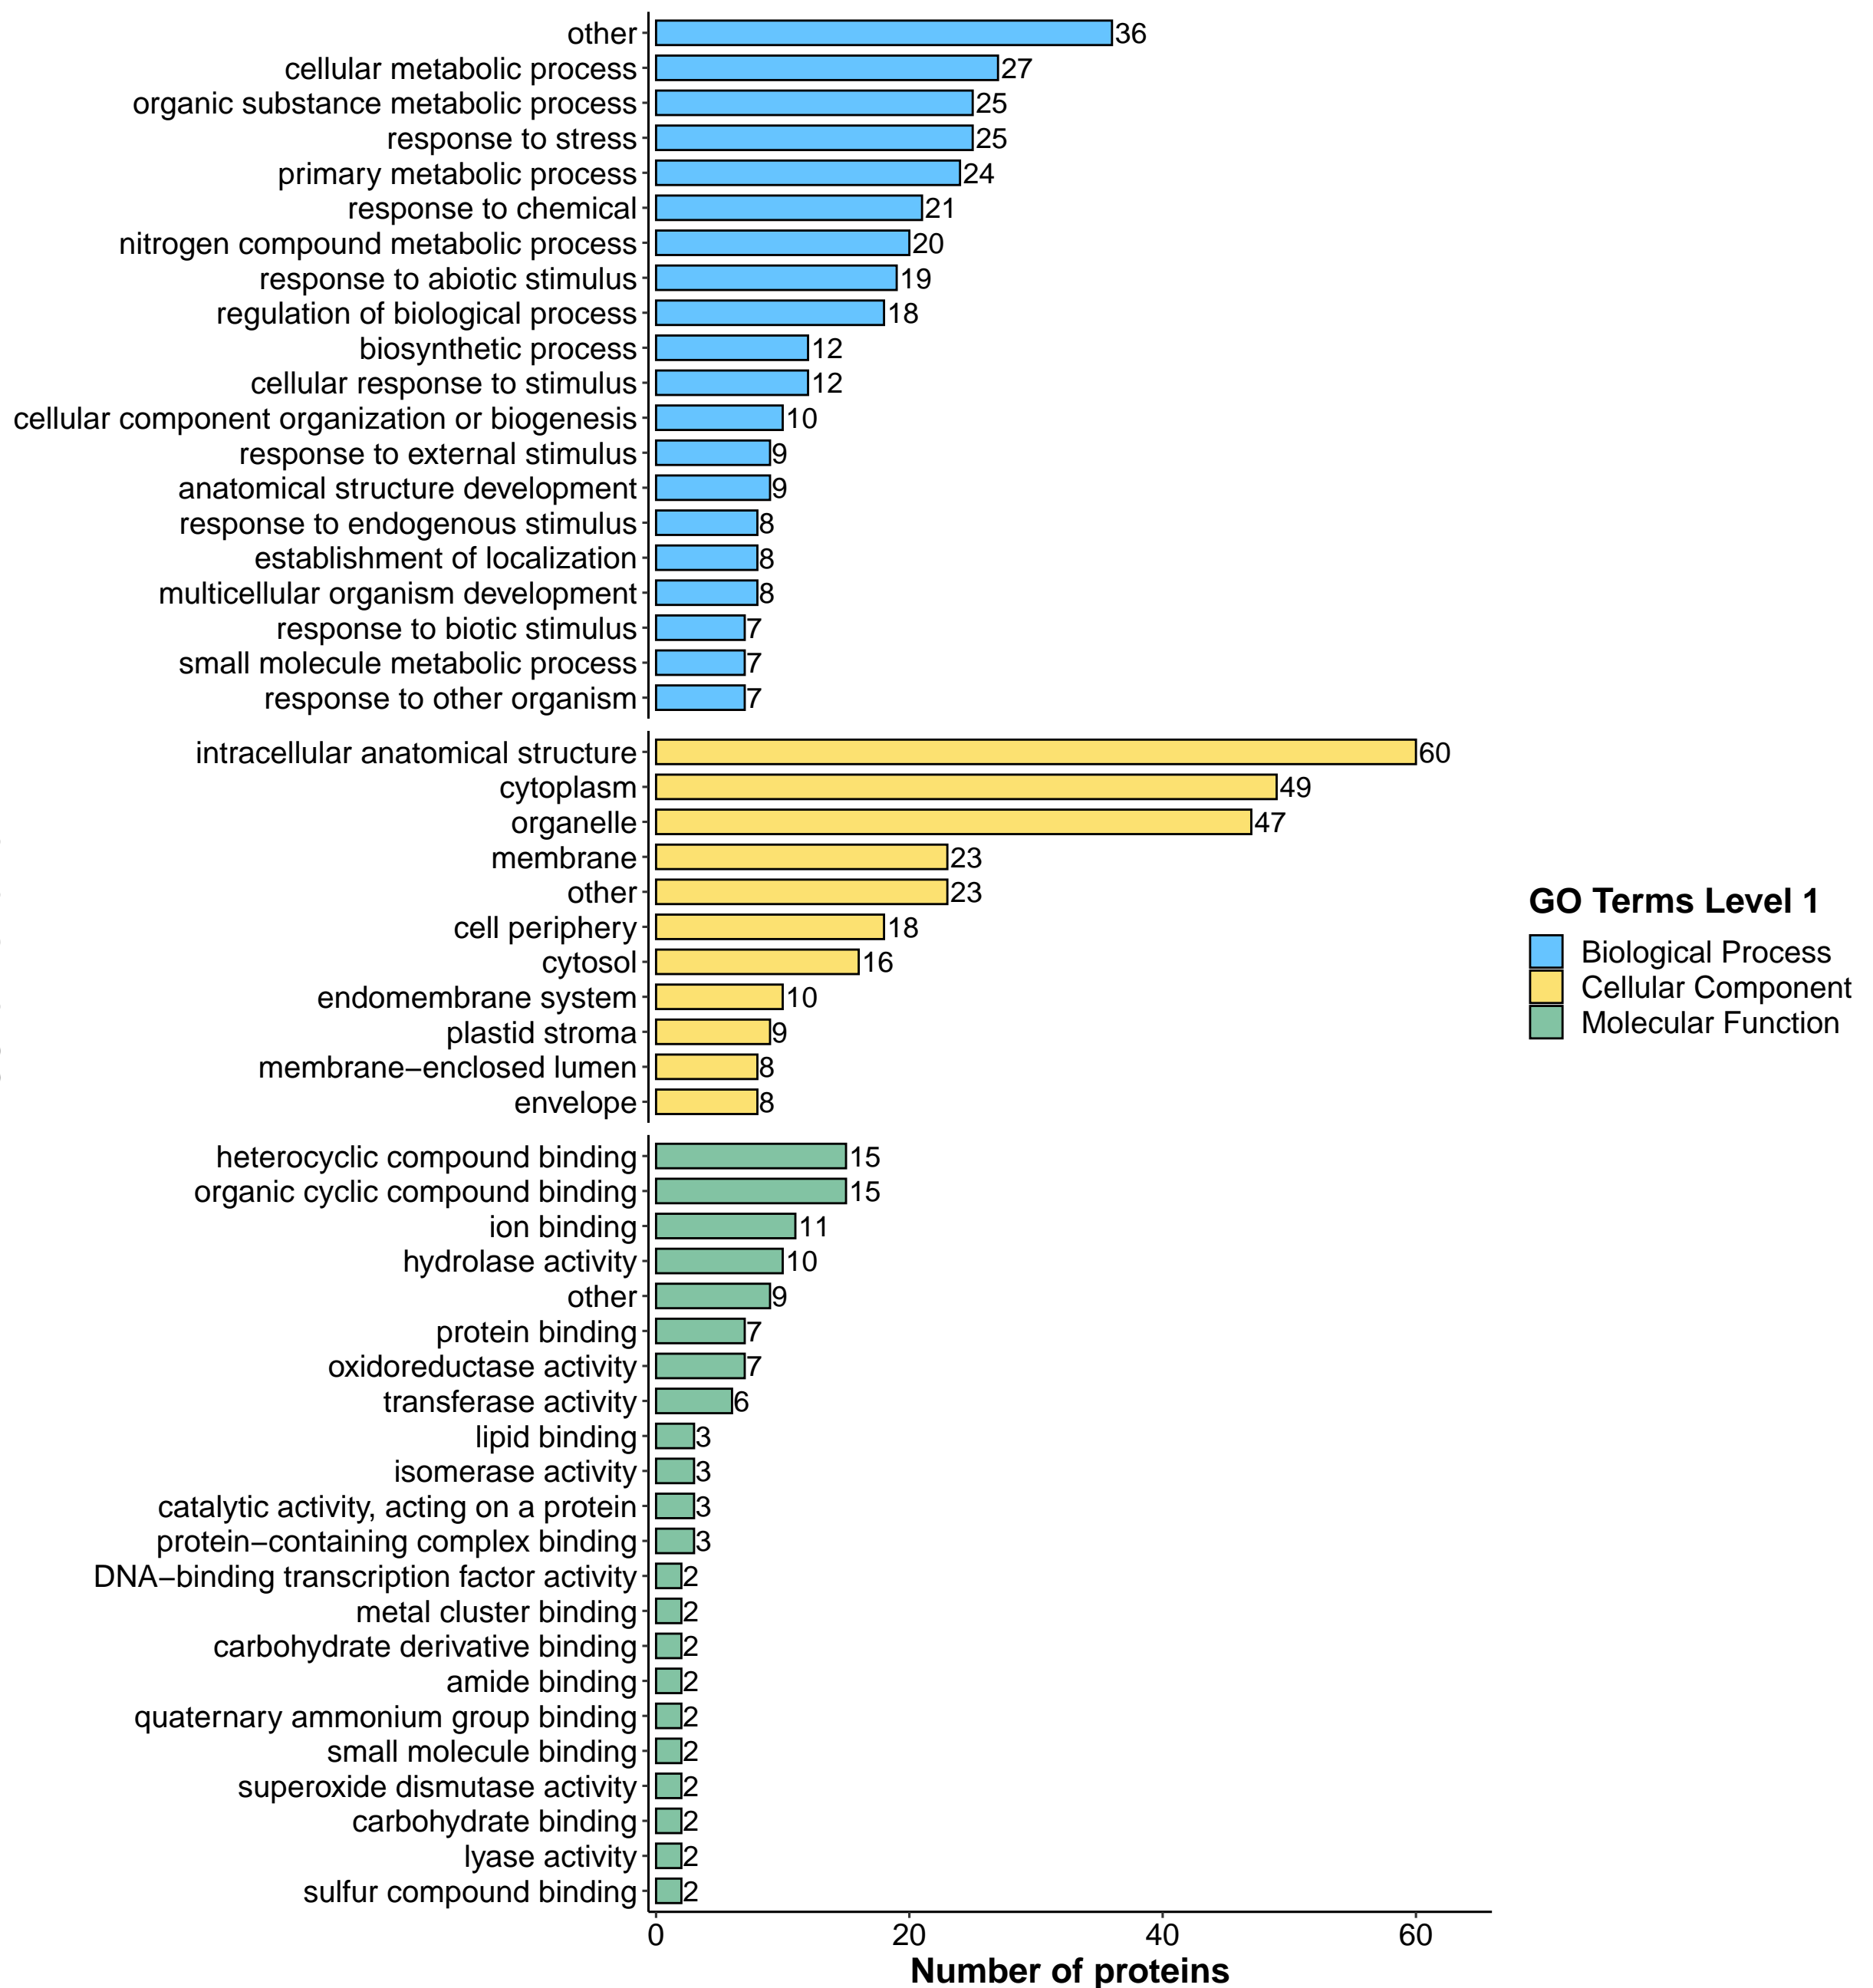

Supplement: Supplementary.zip [file Supplementary.zip]

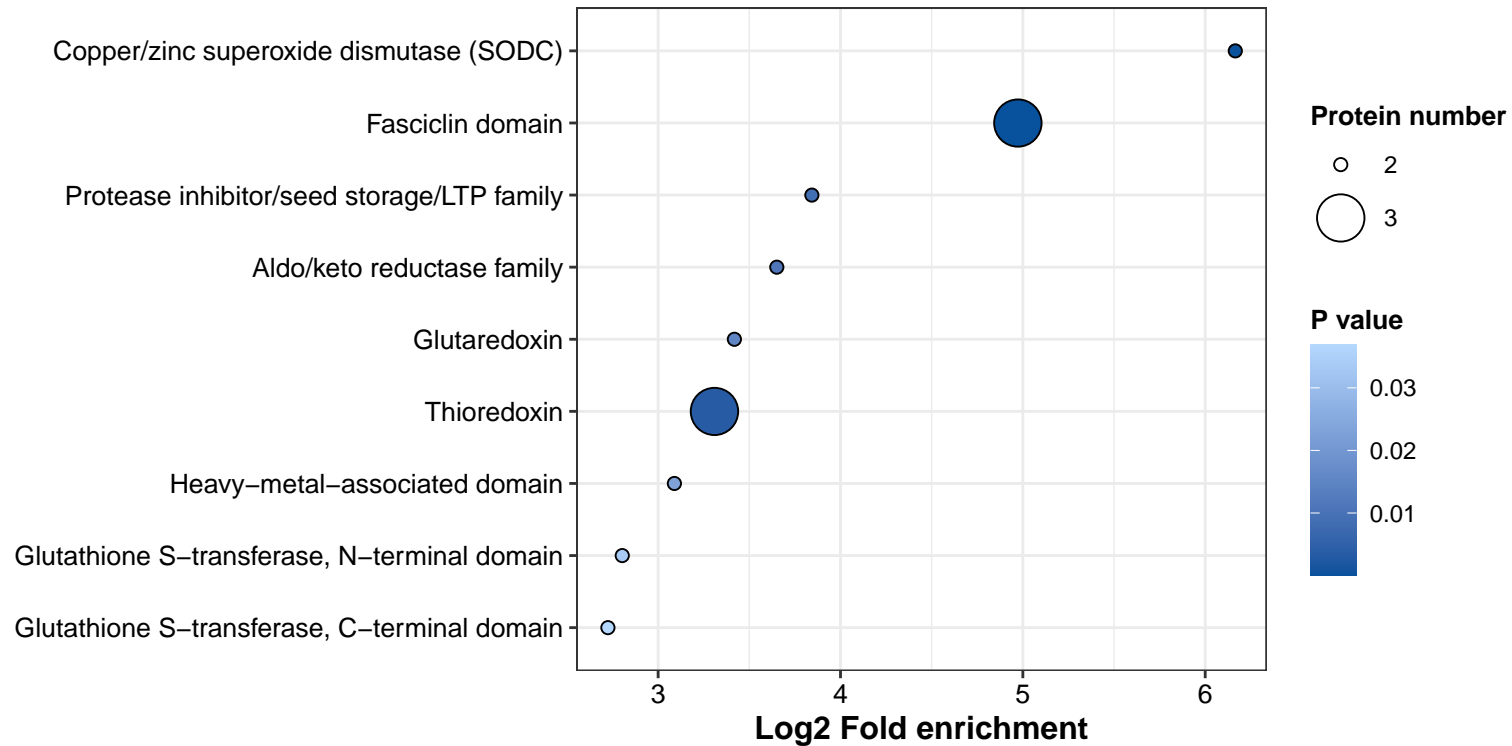

Supplement: Supplementary.zip [file Supplementary.zip]

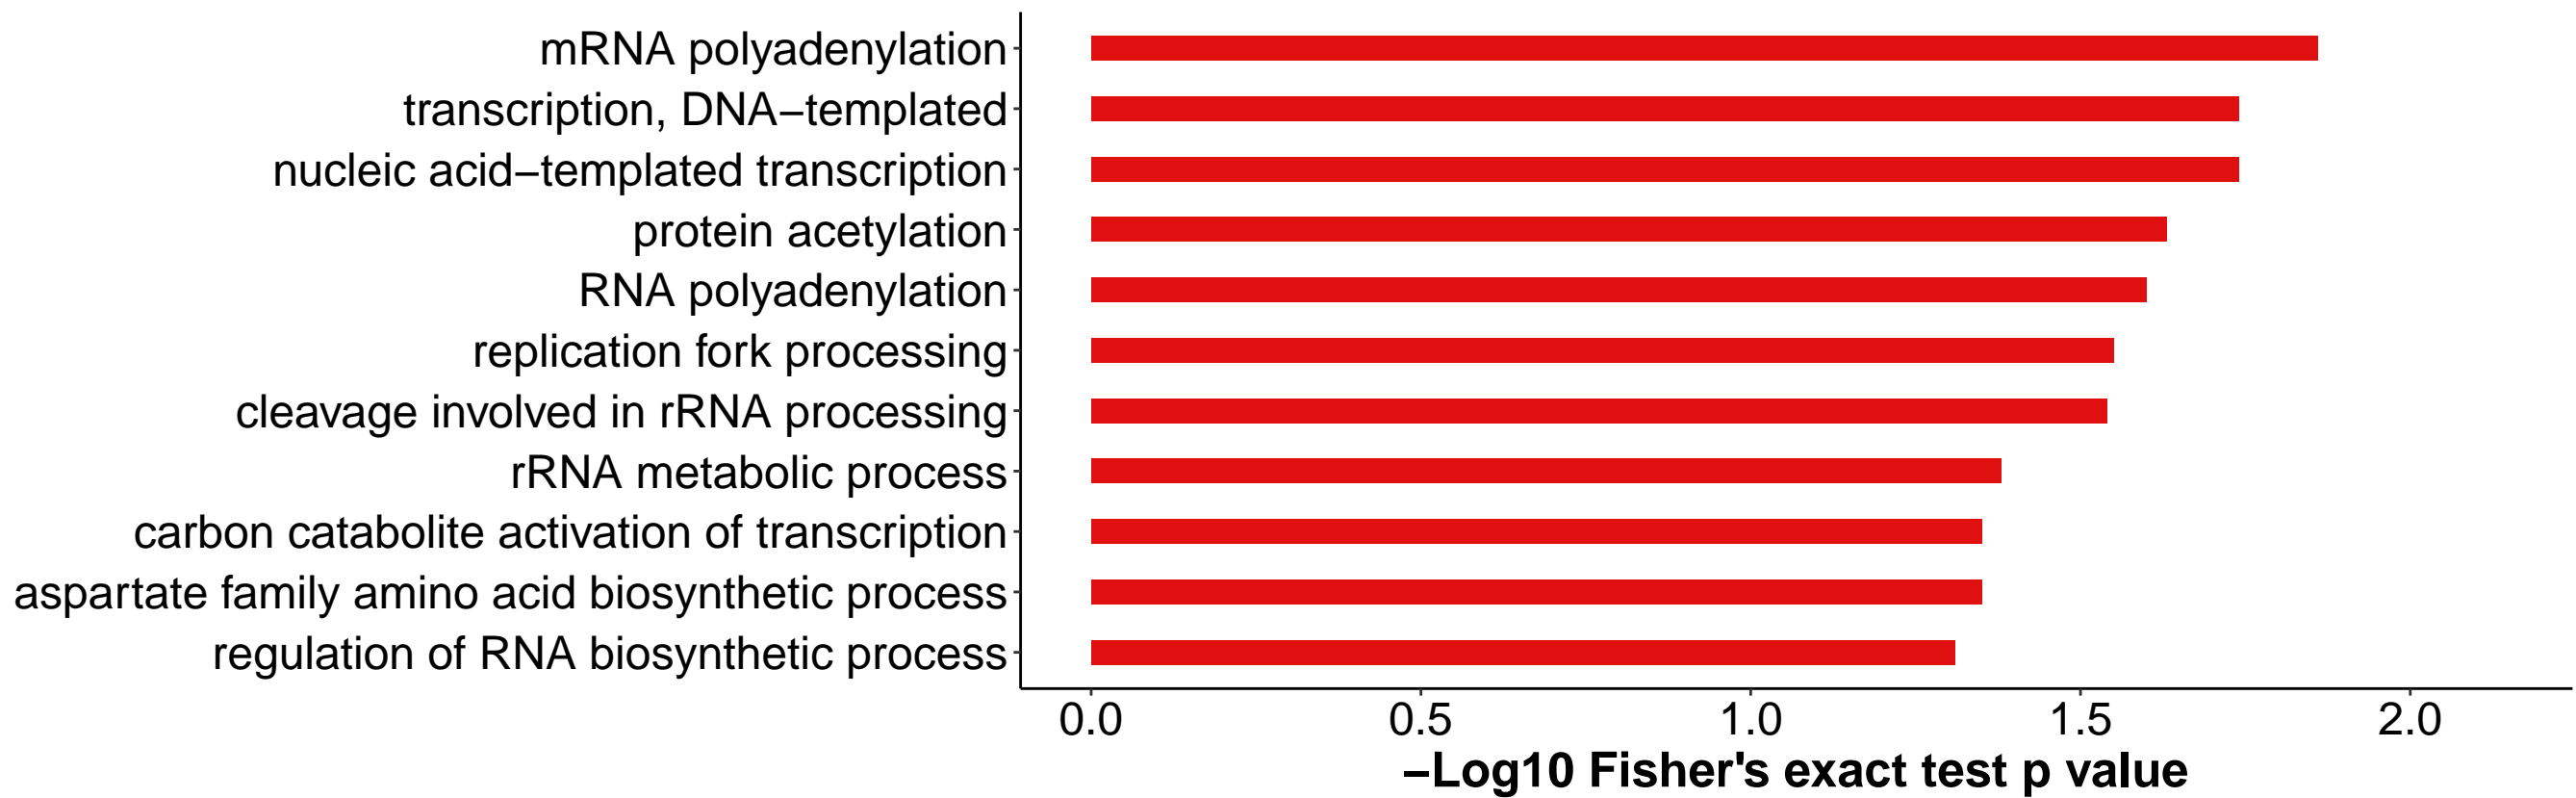

Supplement: Supplementary.zip [file Supplementary.zip]

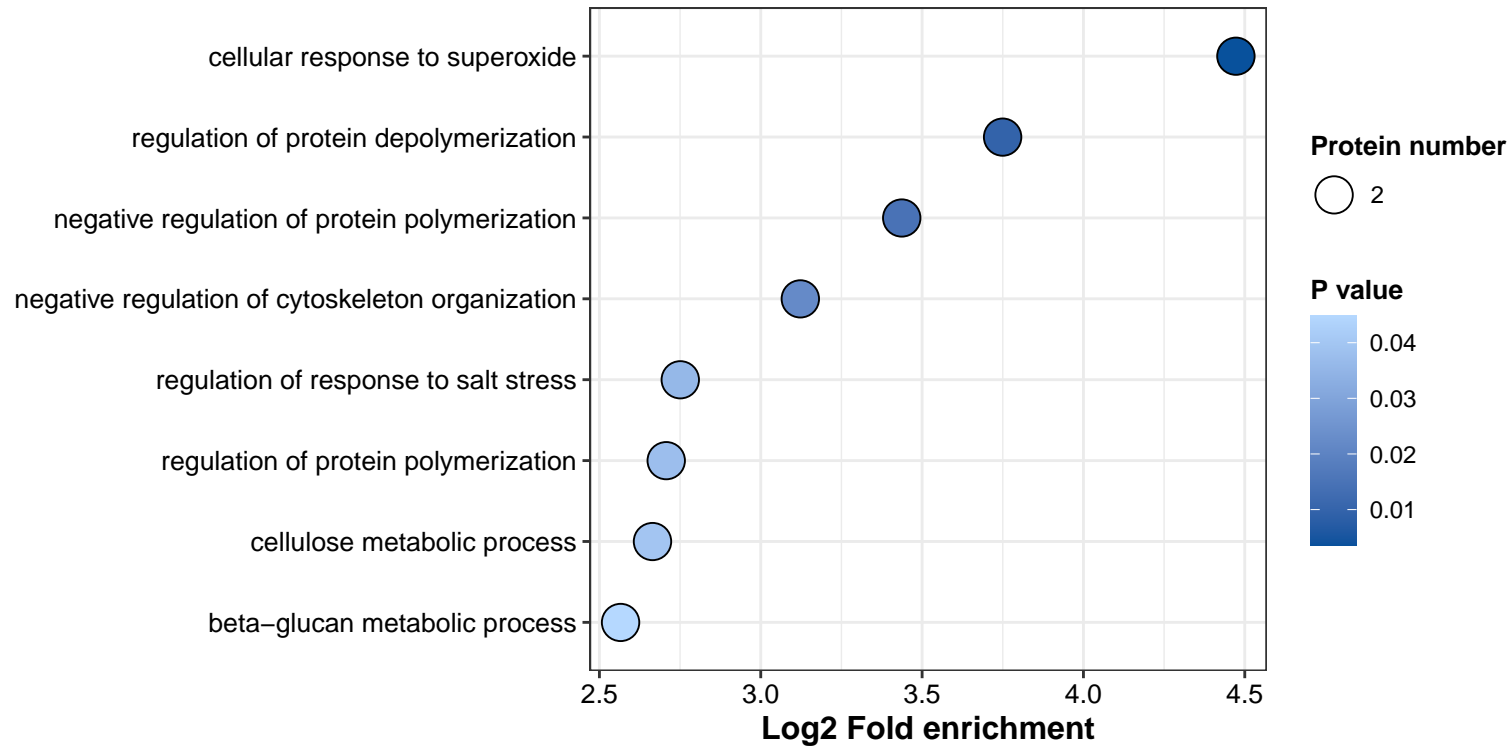

Supplement: Supplementary.zip [file Supplementary.zip]
